# Supplementary material for: Cryo-EM structures of pannexin 1 and 3 reveal differences among pannexin isoforms
Source: Springer Nature journal article supplement (doi:10.1038/s41467-024-47142-6), 2024-04-05
Supplement: MOESM3 [file 41467_2024_47142_MOESM3_ESM.pdf › 41467_2024_47142_MOESM3_ESM.pdf]

**File name: Supplementary Movie 1**

**Description:** The movement of W74 by 80° at the  $\chi^2$  torsion angle leads to reduction in pore size in PANX1 congenital mutant.
