# Supplementary material for: Cryo-EM structures of pannexin 1 and 3 reveal differences among pannexin isoforms
Source: Nat Commun. 2024 Apr 5;15:2942. doi: 10.1038/s41467-024-47142-6 (PMC10997603; doi:10.1038/s41467-024-47142-6)
Supplement: Supplementary file 6 — Source Data [file 41467_2024_47142_MOESM6_ESM.xlsx]

## Sheet: Figure2
Main_ Figure 2(J) Untransfected, with and without CBX
Voltage	Without CBX								With CBX
-120	-6.75872	-6.26826	-6.37449	-9.88971	-7.57715			-4.72304	-6.54951	-6.21062	-6.64663	-5.8235
-110	-5.55679	-5.11509	-5.18452	-7.07777	-6.14274			-3.23008	-5.35524	-4.93524	-5.21315	-4.77152
-100	-4.63788	-4.99026	-4.30322	-5.75235	-4.78568			-3.18678	-4.52303	-3.8291	-4.23424	-3.44098
-90	-2.93293	-2.87618	-3.08955	-3.66432	-3.31434			-2.00037	-2.99912	-3.05294	-2.77426	-2.59162
-80	-1.94074	-1.94779	-1.89641	-2.36397	-2.26023			-1.53007	-2.19765	-2.21661	-2.34072	-1.90885
-70	-0.85399	-1.04111	-1.01697	-0.99861	-1.07853			-0.87344	-0.8126	-0.64134	-1.30984	-0.92674
-60	0.097376	-0.07985	-0.10883	0.050633	0.009694			0.179062	-0.00713	0.253357	0.309177	-0.14224
-50	0.757116	0.989958	0.980698	1.27614	1.00885			0.752345	0.975493	0.901528	0.821739	0.891931
-40	1.88112	1.93168	2.07454	2.71739	2.05715			1.5415	2.09658	1.26635	1.90554	2.01623
-30	2.88748	2.71812	3.07423	3.82342	3.32126			2.06025	2.91012	2.47397	3.10357	3.14723
-20	3.90275	3.62332	3.90127	5.92334	4.88926			3.12921	3.93381	3.70367	4.05693	5.18815
-10	5.00081	4.76421	5.22243	7.71561	6.96679			4.2766	5.07477	5.15439	5.48445	7.11124
0	6.1418	6.02347	6.4226	9.66108	9.1748			5.42498	6.51819	6.38717	6.98592	9.26877
10	7.85852	7.35008	7.85021	11.532	12.0171			6.53696	7.33906	7.25664	9.2747	12.0048
20	9.14733	9.15339	8.84467	14.9617	14.5374			7.46595	8.25694	8.24103	11.1917	15.2177
30	10.393	10.7717	10.426	17.3685	17.2649			8.8674	9.56173	9.66755	13.2516	18.08
40	12.4304	11.7864	12.2261	20.7583	20.2479			10.3549	11.0213	11.9835	15.2251	21.2171
50	13.7592	13.7468	14.2517	23.0866	22.446			11.6091	12.6935	13.8568	17.8568	23.9571
60	16.2255	14.7833	15.5099	25.8242	25.7329			14.1198	14.3234	15.4454	19.6025	27.8489
70	18.4525	16.2092	18.8035	28.696	28.0808			15.6251	15.7853	17.0151	21.1766	30.5885
80	20.4427	18.0748	19.4515	31.3219	30.8727			17.9252	17.586	18.8422	23.3604	35.1538
90	23.9985	19.8833	21.0004	33.656	33.8416			20.9071	18.7515	20.5496	24.7507	37.0764
100	27.0114	20.9911	23.5021	37.9103	36.6565			25.4048	20.5942	23.5068	25.7051	41.7371
110	30.4922	23.4341	23.8198	41.3704	38.8544			28.2299	23.6184	23.6099	27.3244	42.0217
120	32.5642	24.6951	25.2241	43.9507	39.2892			33.0892	23.8419	26.0967	29.582	46.6634
Figure 2 k current density-voltage plot
			PANX1 WT
Voltage	Current density without CBX							Current density with CBX
-120	-53.3683	-54.9052	-59.2253	-33.5313			-51.1318	-42.8387	-21.0039	-16.8458
-100	-35.5807	-36.1944	-39.8423	-22.2916			-33.262	-27.4203	-14.1198	-10.9187
-80	-17.3744	-18.3047	-20.0505	-11.127			-15.5005	-13.3497	-7.08585	-4.97311
-60	0.068215	-0.01415	-0.00903	-0.03168			0.369755	0.022411	0.099974	-0.08426
-40	18.4668	18.4401	20.29	10.9924			16.8478	13.0903	7.29911	4.441
-20	38.0645	37.3786	41.2364	23.0011			34.0373	23.8809	15.4295	9.33182
0	60.7088	60.2694	62.6298	36.953			52.2646	37.4277	24.4015	14.6979
20	93.1296	91.3169	86.1602	58.9419			76.1244	54.8966	35.4689	21.4899
40	133.264	130.385	112.556	84.1253			100.922	74.2735	48.4123	30.473
60	175.162	171.044	140.725	109.012			123.776	93.7737	62.7154	39.6112
80	217.531	211.583	170.544	135.182			144.61	108.592	77.8494	50.3315
100	255.605	251.863	202.827	162.426			164.254	122.266	88.6269	61.7738
120	288.449	295.594	232.249	188.96			175.393	131.612	99.2234	74.2419
Figure 2 l current density-voltage plot
	PANX3_WT
Voltage	Current density without CBX											Current density with CBX
-120	-22.1874	-19.1885	-6.54616	-25.4893	-31.0234	-41.6875			-35.2949	-8.059	-6.20927	-25.2069	-19.6355	-39.327
-100	-16.0445	-13.7434	-4.31798	-17.0448	-20.7953	-27.3866			-23.1021	-5.68014	-3.68335	-15.9125	-13.7374	-24.5533
-80	-8.07436	-11.3908	-2.15406	-8.42835	-10.5339	-14.5082			-10.667	-2.97482	-1.97742	-8.07933	-6.57211	-11.9623
-60	-0.29265	-7.38021	-0.05866	-0.2364	-0.16495	-0.19504			-0.27371	-0.2682	-0.09193	-0.00069	0.019605	0.01545
-40	8.92957	-3.47276	2.05002	8.35239	10.8332	13.4349			11.4737	2.72969	1.66111	7.2824	6.65786	12.2805
-20	20.7692	2.40546	6.16935	16.5927	21.8526	26.9882			23.7556	6.4665	4.18204	14.6107	13.2067	24.286
0	36.7195	12.2366	13.8675	26.3064	34.3326	40.046			38.1411	11.9545	9.73473	22.1665	20.5055	36.2944
20	58.0808	23.2721	25.143	38.8915	48.6638	54.1332			53.6097	19.8681	17.7205	29.5126	28.6155	48.5472
40	79.5926	37.693	37.1029	54.669	65.4208	70.6876			67.6639	27.1855	24.8424	37.6967	37.4239	61.2019
60	103.085	53.4774	50.069	71.3582	83.1972	88.8203			85.1542	32.5922	28.8171	46.6965	46.9954	73.4174
80	126.519	63.5245	62.4229	84.13	101.475	108.225			107.035	39.7992	34.6623	54.7831	56.3264	86.3684
100	151.998	77.6524	75.0341	97.1917	119.918	128.595			125.784	49.3909	41.8753	64.5625	66.0927	100.788
120	179.542	94.4578	86.9514	112.107	139.384	152.667			149.268	55.5132	49.3577	74.7182	76.3637	113.763
Figure 2 m current density-Box plot(for PANX1, 3 and the mutants)
	PANX1WT	PANX3WT	PANX3I74A	PANX3I74W
	255.605	151.998	49.6155	46.9361
	251.863	77.6524	56.7962	49.9358
	202.827	75.0341	30.7276	36.2432
	162.426	97.1917	19.6982	55.1382
	193.21	119.918	77.97
	155.115	128.595	72.6187
	215.439		56.7674
	154.487		47.3422
			38.0424

## Sheet: Figure3
(Main Figure-3f)
PANX2_WT		PANX1_WR/RD
radius	cen_line_D	radius	cen_line_D
34.9181	-73.2513	34.8012	88.648
34.8343	-73.1263	34.6837	88.523
34.7508	-73.0013	34.5661	88.398
34.6675	-72.8763	34.4486	88.273
34.5844	-72.7513	34.3313	88.148
34.5016	-72.6263	34.2141	88.023
34.4191	-72.5013	34.0969	87.898
34.3368	-72.3763	33.9798	87.773
34.2547	-72.2513	33.8627	87.648
34.1729	-72.1263	33.7456	87.523
34.0913	-72.0013	33.6286	87.398
34.0099	-71.8763	33.5116	87.273
33.9288	-71.7513	33.3948	87.148
33.848	-71.6263	33.2778	87.023
33.7674	-71.5013	33.1611	86.898
33.6871	-71.3763	33.0444	86.773
33.6067	-71.2513	32.9276	86.648
33.5269	-71.1263	32.8109	86.523
33.4474	-71.0013	32.6942	86.398
33.3682	-70.8763	32.5777	86.273
33.2892	-70.7513	32.4614	86.148
33.2105	-70.6263	32.3446	86.023
33.1321	-70.5013	32.2283	85.898
33.054	-70.3763	32.1121	85.773
32.9761	-70.2513	31.996	85.648
32.8985	-70.1263	31.8799	85.523
32.8211	-70.0013	31.7638	85.398
32.7441	-69.8763	31.6477	85.273
32.6673	-69.7513	31.5318	85.148
32.5909	-69.6263	31.4158	85.023
32.5147	-69.5013	31.3	84.898
32.4388	-69.3763	31.1843	84.773
32.3631	-69.2513	31.0687	84.648
32.2878	-69.1263	30.9531	84.523
32.2128	-69.0013	30.8374	84.398
32.1381	-68.8763	30.7217	84.273
32.0636	-68.7513	30.6063	84.148
31.9895	-68.6263	30.4911	84.023
31.9157	-68.5013	30.3759	83.898
31.842	-68.3763	30.2608	83.773
31.7686	-68.2513	30.1457	83.648
31.6956	-68.1263	30.0308	83.5229
31.623	-68.0013	29.9158	83.3979
31.5507	-67.8763	29.801	83.2729
31.4788	-67.7513	29.6862	83.1479
31.4071	-67.6263	29.5714	83.0229
31.3358	-67.5013	29.4567	82.8979
31.2647	-67.3763	29.3421	82.7729
31.194	-67.2513	29.2276	82.6479
31.1236	-67.1263	29.1131	82.5229
31.0536	-67.0013	28.9987	82.3979
30.9839	-66.8763	28.8844	82.2729
30.9145	-66.7513	28.7702	82.1479
30.8454	-66.6263	28.6561	82.0229
30.7767	-66.5013	28.5426	81.8979
30.7083	-66.3763	28.4283	81.7729
30.6402	-66.2513	28.3146	81.6479
30.5725	-66.1263	28.2009	81.5229
30.5051	-66.0013	28.0874	81.3979
30.438	-65.8763	27.9737	81.2729
30.3713	-65.7513	27.8602	81.1479
30.305	-65.6263	27.7466	81.0229
30.2389	-65.5013	27.6336	80.8979
30.1733	-65.3763	27.5202	80.7729
30.108	-65.2513	27.4072	80.6479
30.0431	-65.1263	27.2943	80.5229
29.9785	-65.0013	27.1814	80.3979
29.9143	-64.8763	27.0685	80.2729
29.8504	-64.7513	26.956	80.1479
29.7869	-64.6263	26.8435	80.0229
29.7238	-64.5013	26.731	79.8979
29.6611	-64.3763	26.6187	79.7729
29.5986	-64.2513	26.5062	79.6479
29.5366	-64.1263	26.3937	79.5229
29.4751	-64.0013	26.2817	79.3979
29.4139	-63.8763	26.1699	79.2729
29.3531	-63.7513	26.0581	79.1479
29.2926	-63.6263	25.9465	79.0229
29.2326	-63.5013	25.8349	78.8979
29.1729	-63.3763	25.7235	78.7729
29.1137	-63.2513	25.6122	78.6479
29.0548	-63.1263	25.5009	78.5229
28.9963	-63.0013	25.3895	78.3979
28.9383	-62.8763	25.2783	78.2729
28.8806	-62.7513	25.168	78.1479
28.8234	-62.6263	25.0566	78.0229
28.7665	-62.5013	24.946	77.8978
28.71	-62.3763	24.8356	77.7728
28.654	-62.2513	24.7253	77.6478
28.5983	-62.1263	24.6151	77.5228
28.5431	-62.0013	24.505	77.3978
28.4882	-61.8763	24.395	77.2728
28.4338	-61.7513	24.2851	77.1478
28.3798	-61.6263	24.1754	77.0228
28.3262	-61.5013	24.0659	76.8978
28.273	-61.3763	23.9564	76.7728
28.22	-61.2513	23.8472	76.6478
28.1677	-61.1263	23.7381	76.5228
28.1159	-61.0013	23.629	76.3978
28.0645	-60.8763	23.5201	76.2728
28.0136	-60.7513	23.4113	76.1478
27.9631	-60.6263	23.3027	76.0228
27.913	-60.5013	23.1945	75.8978
27.8634	-60.3763	23.086	75.7728
27.8143	-60.2513	22.978	75.6478
27.7656	-60.1263	22.8699	75.5228
27.7173	-60.0013	22.7622	75.3978
27.6695	-59.8763	22.6545	75.2728
27.6222	-59.7513	22.5471	75.1478
27.5753	-59.6263	22.4399	75.0228
27.5288	-59.5013	22.3326	74.8978
27.4828	-59.3763	22.2255	74.7728
27.4373	-59.2513	22.1188	74.6478
27.3923	-59.1263	22.0124	74.5228
27.3477	-59.0013	21.906	74.3978
27.3036	-58.8763	21.7998	74.2728
27.26	-58.7513	21.6938	74.1478
27.2169	-58.6263	21.5879	74.0228
27.1739	-58.5013	21.4823	73.8978
27.1317	-58.3763	21.3769	73.7728
27.0899	-58.2513	21.2714	73.6478
27.0487	-58.1263	21.1661	73.5228
27.0079	-58.0013	21.0613	73.3978
26.9677	-57.8763	20.9567	73.2728
26.9279	-57.7513	20.8521	73.1478
26.8886	-57.6263	20.7474	73.0228
26.8498	-57.5013	20.6441	72.8978
26.8115	-57.3763	20.5396	72.7727
26.7737	-57.2513	20.4361	72.6477
26.7364	-57.1263	20.3328	72.5227
26.6996	-57.0013	20.2297	72.3977
26.6633	-56.8763	20.1269	72.2727
26.6275	-56.7513	20.0242	72.1477
26.5922	-56.6263	19.9217	72.0227
26.5573	-56.5013	19.8194	71.8977
26.5231	-56.3763	19.7173	71.7727
26.4891	-56.2513	19.6155	71.6477
26.4559	-56.1263	19.514	71.5227
26.4232	-56.0013	19.4127	71.3977
26.391	-55.8763	19.3115	71.2727
26.3594	-55.7513	19.2107	71.1477
26.3283	-55.6263	19.1101	71.0227
26.2976	-55.5013	19.0098	70.8977
26.2675	-55.3763	18.9097	70.7727
26.238	-55.2513	18.81	70.6477
26.209	-55.1263	18.7105	70.5227
26.1805	-55.0013	18.6118	70.3977
26.1525	-54.8763	18.5124	70.2727
26.125	-54.7513	18.4138	70.1477
26.0981	-54.6263	18.3156	70.0227
26.0718	-54.5013	18.2177	69.8977
26.0459	-54.3763	18.1202	69.7727
26.0206	-54.2513	18.0229	69.6477
25.9959	-54.1263	17.926	69.5227
25.9717	-54.0013	17.829	69.3977
25.948	-53.8763	17.7325	69.2727
25.9249	-53.7513	17.6365	69.1477
25.9022	-53.6262	17.5408	69.0227
25.8797	-53.5012	17.4452	68.8977
25.8269	-53.3761	17.3499	68.7727
25.7736	-53.251	17.2553	68.6477
25.7178	-53.126	17.161	68.5227
25.6624	-53.001	17.067	68.3977
25.6075	-52.876	16.9731	68.2727
25.5527	-52.751	16.8798	68.1477
25.4988	-52.626	16.7865	68.0227
25.4452	-52.501	16.6939	67.8977
25.3922	-52.376	16.6016	67.7727
25.3396	-52.251	16.5099	67.6477
25.2875	-52.126	16.4186	67.5227
25.2359	-52.001	16.3278	67.3977
25.1848	-51.876	16.2373	67.2727
25.1341	-51.751	16.1469	67.1477
25.084	-51.626	16.057	67.0227
25.0343	-51.501	15.9677	66.8977
24.9851	-51.376	15.8785	66.7727
24.9364	-51.251	15.7902	66.6476
24.8882	-51.126	15.7019	66.5226
24.8406	-51.001	15.6145	66.3976
24.7934	-50.876	15.5275	66.2726
24.7468	-50.751	15.4408	66.1476
24.7007	-50.626	15.3545	66.0226
24.655	-50.501	15.2689	65.8976
24.6099	-50.376	15.1838	65.7726
24.5653	-50.251	15.099	65.6476
24.5212	-50.126	15.0147	65.5226
24.4775	-50.001	14.9309	65.3976
24.4345	-49.876	14.8475	65.2726
24.392	-49.751	14.7646	65.1476
24.35	-49.626	14.6822	65.0226
24.3086	-49.501	14.6014	64.8976
24.2677	-49.376	14.5195	64.7725
24.2274	-49.251	14.4391	64.6475
24.1876	-49.126	14.3593	64.5225
24.1484	-49.001	14.2801	64.3975
24.1097	-48.876	14.2014	64.2725
24.0715	-48.751	14.1234	64.1475
24.0339	-48.626	14.0456	64.0225
23.9969	-48.501	13.9683	63.8976
23.9604	-48.376	13.8893	63.7726
23.9244	-48.251	13.805	63.6476
23.8891	-48.126	13.721	63.5226
23.8543	-48.001	13.6373	63.3976
23.82	-47.876	13.554	63.2726
23.7863	-47.751	13.4719	63.1476
23.7532	-47.626	13.3903	63.0226
23.7206	-47.501	13.3093	62.8975
23.6886	-47.376	13.2288	62.7725
23.6572	-47.251	13.1486	62.6475
23.6263	-47.126	13.0688	62.5224
23.596	-47.001	12.9903	62.3974
23.5663	-46.876	12.9124	62.2724
23.5372	-46.751	12.8351	62.1474
23.5086	-46.626	12.7585	62.0224
23.4804	-46.5009	12.6826	61.8974
23.4531	-46.3759	12.6074	61.7724
23.4264	-46.2509	12.5328	61.6474
23.4002	-46.1259	12.4585	61.5224
23.3747	-46.0009	12.3854	61.3974
23.3498	-45.8759	12.3126	61.2724
23.3255	-45.7509	12.2408	61.1474
23.3017	-45.6259	12.1696	61.0224
23.2786	-45.5009	12.0996	60.8974
23.2561	-45.3759	12.0296	60.7724
23.2342	-45.2509	11.9607	60.6474
23.2129	-45.1259	11.8926	60.5224
23.1922	-45.0009	11.8256	60.3974
23.1721	-44.8759	11.7594	60.2724
23.1527	-44.7509	11.6936	60.1474
23.1338	-44.6259	11.6287	60.0224
23.1156	-44.5009	11.565	59.8974
23.0979	-44.3759	11.5023	59.7724
23.0809	-44.2509	11.44	59.6474
23.0644	-44.1259	11.3787	59.5224
23.0487	-44.0009	11.3186	59.3974
23.0334	-43.8759	11.2594	59.2724
23.0189	-43.7509	11.1866	59.1474
23.0049	-43.6259	11.1123	59.0224
22.9916	-43.5009	11.0384	58.8974
22.9791	-43.3759	10.9652	58.7724
22.967	-43.2509	10.8929	58.6474
22.9556	-43.1259	10.8214	58.5224
22.9449	-43.0009	10.7507	58.3974
22.9348	-42.8759	10.6809	58.2724
22.9253	-42.7509	10.6125	58.1474
22.9164	-42.6259	10.5439	58.0224
22.9082	-42.5009	10.4768	57.8974
22.9005	-42.3759	10.4107	57.7724
22.8936	-42.2509	10.3455	57.6474
22.8872	-42.1259	10.2814	57.5224
22.8813	-42.0009	10.2182	57.3974
22.8767	-41.8759	10.156	57.2724
22.8711	-41.7509	10.0947	57.1474
22.8673	-41.6259	10.0345	57.0224
22.8642	-41.5009	9.97531	56.8974
22.8365	-41.3758	9.91721	56.7724
22.7386	-41.2506	9.86016	56.6474
22.6375	-41.1256	9.8042	56.5224
22.5367	-41.0006	9.74881	56.3974
22.436	-40.8756	9.69452	56.2724
22.3356	-40.7506	9.64189	56.1474
22.2354	-40.6256	9.5904	56.0224
22.1355	-40.5006	9.54007	55.8974
22.0357	-40.3756	9.49092	55.7724
21.9362	-40.2506	9.44295	55.6474
21.837	-40.1256	9.3962	55.5224
21.7379	-40.0006	9.35066	55.3974
21.6394	-39.8756	9.30636	55.2724
21.5406	-39.7506	9.26332	55.1474
21.4424	-39.6256	9.22151	55.0224
21.3445	-39.5006	9.18091	54.8974
21.2468	-39.3756	9.14157	54.7724
21.1493	-39.2506	9.10361	54.6474
21.0522	-39.1256	9.06692	54.5224
20.9553	-39.0006	9.03158	54.3974
20.8586	-38.8756	8.99758	54.2724
20.7623	-38.7506	8.96504	54.1474
20.6662	-38.6256	8.93345	54.0224
20.5705	-38.5006	8.9037	53.8974
20.4749	-38.3756	8.87535	53.7724
20.3797	-38.2506	8.84831	53.6474
20.2848	-38.1256	8.82269	53.5224
20.1902	-38.0006	8.79811	53.3973
20.0959	-37.8756	8.77498	53.2723
20.0019	-37.7506	8.75378	53.1473
19.9082	-37.6256	8.73405	53.0223
19.8148	-37.5006	8.66443	52.8919
19.7217	-37.3756	8.58383	52.7616
19.6289	-37.2506	8.48456	52.6366
19.5365	-37.1256	8.38579	52.5115
19.4444	-37.0006	8.28798	52.3865
19.3527	-36.8756	8.19078	52.2615
19.2613	-36.7506	8.09457	52.1365
19.1702	-36.6256	7.99885	52.0115
19.0795	-36.5006	7.90335	51.8865
18.9891	-36.3756	7.80853	51.7615
18.8991	-36.2506	7.71465	51.6365
18.8094	-36.1256	7.62136	51.5115
18.7201	-36.0006	7.52934	51.3864
18.6312	-35.8756	7.43739	51.2614
18.5427	-35.7506	7.34651	51.1364
18.4546	-35.6256	7.2562	51.0113
18.3668	-35.5006	7.16691	50.8862
18.2796	-35.3756	7.07823	50.761
18.1924	-35.2506	6.99047	50.636
18.1059	-35.1256	6.90361	50.511
18.0198	-35.0006	6.81713	50.3858
17.9341	-34.8756	6.73116	50.2606
17.8488	-34.7506	6.63458	50.1356
17.7639	-34.6256	6.53875	50.0106
17.6795	-34.5006	6.44389	49.8856
17.5957	-34.3756	6.34936	49.7606
17.5118	-34.2506	6.25631	49.6356
17.4288	-34.1256	6.16316	49.5106
17.3461	-34.0006	6.07179	49.3856
17.264	-33.8756	5.98066	49.2605
17.1823	-33.7506	5.89145	49.1355
17.101	-33.6256	5.80227	49.0105
17.0202	-33.5006	5.71507	48.8855
16.94	-33.3756	5.62817	48.7605
16.8602	-33.2506	5.54262	48.6355
16.7809	-33.1256	5.45743	48.5105
16.7021	-33.0006	5.37485	48.3855
16.6239	-32.8756	5.29227	48.2604
16.5461	-32.7506	5.21185	48.1354
16.4689	-32.6256	5.13202	48.0104
16.3922	-32.5006	5.0541	47.8854
16.3161	-32.3756	4.97759	47.7604
16.2404	-32.2506	4.90223	47.6354
16.1652	-32.1256	4.828	47.5104
16.0905	-32.0006	4.75592	47.3854
16.0166	-31.8756	4.68522	47.2604
15.9432	-31.7506	4.61589	47.1353
15.8704	-31.6256	4.54772	47.0102
15.7982	-31.5006	4.48241	46.8852
15.7266	-31.3756	4.4186	46.7602
15.6555	-31.2506	4.35659	46.6352
15.5851	-31.1256	4.29651	46.5102
15.5153	-31.0006	4.23878	46.3851
15.4462	-30.8756	4.18309	46.2601
15.3776	-30.7506	4.12913	46.1351
15.3097	-30.6256	4.07692	46.0101
15.2424	-30.5006	4.02772	45.885
15.1758	-30.3756	3.97965	45.76
15.1099	-30.2506	3.93514	45.635
15.0446	-30.1256	3.89299	45.51
14.98	-30.0006	3.85237	45.385
14.916	-29.8756	3.81422	45.26
14.8528	-29.7506	3.77858	45.135
14.7902	-29.6256	3.74545	45.01
14.7283	-29.5006	3.71591	44.8849
14.6671	-29.3756	3.68879	44.7598
14.6067	-29.2506	3.66385	44.6348
14.547	-29.1256	3.64139	44.5098
14.488	-29.0006	3.62244	44.3848
14.4298	-28.8756	3.60499	44.2598
14.3723	-28.7506	3.59222	44.1348
14.3156	-28.6256	3.58192	44.0098
14.2596	-28.5006	3.57386	43.8848
14.2045	-28.3756	3.5683	43.7597
14.1501	-28.2506	3.56604	43.6347
14.0965	-28.1256	3.56581	43.5097
14.0437	-28.0006	3.56972	43.3847
13.9915	-27.8756	3.5748	43.2597
13.9397	-27.7506	3.53615	43.1343
13.8893	-27.6255	3.49333	43.0089
13.8242	-27.5005	3.44387	42.8839
13.7542	-27.3755	3.39605	42.7589
13.6848	-27.2505	3.35029	42.6339
13.6161	-27.1255	3.30721	42.5089
13.5481	-27.0005	3.26915	42.3838
13.4808	-26.8755	3.23171	42.2588
13.4142	-26.7505	3.19869	42.1338
13.3485	-26.6255	3.16774	42.0088
13.2835	-26.5005	3.13971	41.8838
13.2192	-26.3755	3.1144	41.7588
13.1557	-26.2505	3.09233	41.6338
13.093	-26.1255	3.0734	41.5087
13.0311	-26.0005	3.05779	41.3837
12.97	-25.8755	3.04442	41.2587
12.9097	-25.7505	3.03536	41.1337
12.8503	-25.6255	3.02954	41.0086
12.7916	-25.5005	3.02727	40.8836
12.7338	-25.3755	3.02744	40.7586
12.6769	-25.2505	3.03168	40.6336
12.6211	-25.1255	3.03879	40.5086
12.5655	-25.0005	3.04781	40.3836
12.5111	-24.8755	3.06008	40.2586
12.4577	-24.7505	3.07608	40.1336
12.4052	-24.6255	3.09527	40.0085
12.3535	-24.5005	3.11756	39.8835
12.3028	-24.3755	3.14273	39.7585
12.2529	-24.2505	3.17156	39.6335
12.204	-24.1255	3.2022	39.5085
12.1561	-24.0005	3.23637	39.3835
12.1091	-23.8755	3.27333	39.2585
12.0631	-23.7505	3.31342	39.1335
12.0182	-23.6255	3.35618	39.0085
11.9741	-23.5005	3.40156	38.8835
11.9311	-23.3755	3.44956	38.7584
11.8892	-23.2505	3.50026	38.6334
11.8483	-23.1255	3.55342	38.5084
11.8081	-23.0004	3.60905	38.3834
11.7692	-22.8754	3.66688	38.2584
11.7312	-22.7504	3.72662	38.1334
11.6944	-22.6254	3.78852	38.0084
11.6587	-22.5004	3.85275	37.8834
11.6241	-22.3754	3.91876	37.7584
11.5905	-22.2504	3.98689	37.6334
11.558	-22.1254	4.05691	37.5084
11.5267	-22.0004	4.12876	37.3834
11.4964	-21.8754	4.20237	37.2584
11.4672	-21.7504	4.27844	37.1334
11.4392	-21.6254	4.35506	37.0084
11.4123	-21.5004	4.43356	36.8834
11.3865	-21.3754	4.51357	36.7584
11.3619	-21.2504	4.595	36.6334
11.3384	-21.1254	4.67784	36.5084
11.3161	-21.0004	4.76231	36.3834
11.2949	-20.8754	4.84807	36.2584
11.2749	-20.7504	4.93475	36.1334
11.256	-20.6254	5.02263	36.0084
11.2383	-20.5004	5.11179	35.8834
11.2218	-20.3754	5.20206	35.7584
11.2064	-20.2504	5.29356	35.6334
11.1921	-20.1254	5.38607	35.5084
11.1787	-20.0004	5.47928	35.3834
11.167	-19.8754	5.57338	35.2584
11.1565	-19.7504	5.66816	35.1333
11.1472	-19.6254	5.76321	35.0083
11.1391	-19.5004	5.86029	34.8833
11.1322	-19.3754	5.95817	34.7583
11.1265	-19.2504	6.05682	34.6333
11.122	-19.1254	6.15622	34.5083
11.1187	-19.0004	6.25633	34.3833
11.1167	-18.8754	6.35714	34.2583
11.1159	-18.7504	6.45861	34.1333
11.1162	-18.6254	6.56073	34.0083
11.1177	-18.5004	6.66327	33.8833
11.1205	-18.3754	6.76642	33.7583
11.1245	-18.2504	6.87033	33.6333
11.13	-18.1254	6.97479	33.5083
11.1357	-18.0004	7.07948	33.3833
11.1436	-17.8754	7.1847	33.2583
11.152	-17.7504	7.29071	33.1333
11.1621	-17.6254	7.39703	33.0083
11.1733	-17.5004	7.504	32.8833
11.1858	-17.3754	7.61092	32.7583
11.1995	-17.2504	7.71859	32.6333
11.2143	-17.1254	7.82669	32.5083
11.2304	-17.0004	7.93517	32.3833
11.2476	-16.8754	8.04405	32.2583
11.266	-16.7504	8.15331	32.1333
11.2855	-16.6254	8.26294	32.0083
11.3063	-16.5004	8.37342	31.8833
11.3282	-16.3754	8.48344	31.7583
11.3512	-16.2504	8.59427	31.6333
11.3754	-16.1254	8.70542	31.5083
11.4008	-16.0004	8.81666	31.3833
11.4273	-15.8754	8.92819	31.2583
11.4549	-15.7504	9.04025	31.1333
11.4836	-15.6254	9.15251	31.0083
11.5135	-15.5004	9.26489	30.8833
11.5444	-15.3754	9.37754	30.7583
11.5765	-15.2504	9.49026	30.6333
11.6097	-15.1254	9.60323	30.5083
11.6439	-15.0004	9.7116	30.3824
11.6792	-14.8754	9.82025	30.2566
11.7155	-14.7504	9.77742	30.1316
11.7529	-14.6254	9.73428	30.0066
11.7913	-14.5004	9.69294	29.8816
11.8308	-14.3754	9.65281	29.7566
11.8713	-14.2504	9.6141	29.6316
11.9128	-14.1254	9.57665	29.5066
11.9553	-14.0004	9.53989	29.3816
11.9989	-13.8754	9.50432	29.2566
12.0434	-13.7504	9.47057	29.1315
12.0889	-13.6254	9.43772	29.0065
12.1354	-13.5004	9.4055	28.8815
12.1829	-13.3754	9.37402	28.7565
12.2313	-13.2504	9.32735	28.6313
12.2812	-13.1254	9.27948	28.5062
12.3307	-13.0004	9.22784	28.3812
12.382	-12.8754	9.17737	28.2562
12.4342	-12.7504	9.12783	28.1312
12.4873	-12.6254	9.07949	28.0062
12.5413	-12.5004	9.03264	27.8812
12.5962	-12.3754	8.98703	27.7562
12.652	-12.2504	8.94199	27.6312
12.7087	-12.1254	8.89822	27.5062
12.7662	-12.0004	8.85601	27.3812
12.8245	-11.8754	8.81509	27.2562
12.8837	-11.7504	8.77568	27.1312
12.9437	-11.6254	8.73757	27.0062
13.0045	-11.5004	8.70105	26.8812
13.0661	-11.3754	8.66556	26.7562
13.1286	-11.2504	8.63092	26.6311
13.1918	-11.1254	8.59766	26.5061
13.2558	-11.0004	8.56686	26.3811
13.3207	-10.8754	8.53706	26.256
13.386	-10.7504	8.50889	26.131
13.4523	-10.6254	8.48201	26.006
13.5191	-10.5004	8.4564	25.881
13.5868	-10.3754	8.43211	25.756
13.6552	-10.2504	8.40915	25.631
13.7243	-10.1254	8.38767	25.506
13.7942	-10.0004	8.36819	25.381
13.8647	-9.87537	8.34963	25.256
13.9359	-9.75037	8.33314	25.131
14.0078	-9.62537	8.31743	25.006
14.0802	-9.50037	8.30386	24.881
14.1532	-9.37536	8.29148	24.756
14.2267	-9.25036	8.28036	24.6309
14.3013	-9.12532	8.27005	24.5059
14.3761	-9.00028	8.26279	24.3809
14.4518	-8.87528	8.25707	24.2559
14.5282	-8.75028	8.25289	24.1309
14.6051	-8.62528	8.25026	24.0059
14.6826	-8.50028	8.24907	23.8809
14.7606	-8.37528	8.24889	23.7559
14.8392	-8.25028	8.24992	23.6309
14.9184	-8.12527	8.25249	23.5059
14.9981	-8.00026	8.25695	23.3809
15.0784	-7.87526	8.26295	23.2559
15.1593	-7.75026	8.27049	23.1309
15.2407	-7.62526	8.27957	23.0059
15.3226	-7.50026	8.29018	22.8809
15.4051	-7.37526	8.30232	22.7559
15.488	-7.25026	8.31576	22.6309
15.5715	-7.12526	8.33072	22.5059
15.6555	-7.00026	8.34709	22.3809
15.7399	-6.87526	8.36497	22.2559
15.8249	-6.75026	8.38465	22.1309
15.9103	-6.62526	8.40583	22.0059
15.9962	-6.50026	8.42848	21.8809
16.0826	-6.37526	8.45259	21.7559
16.1694	-6.25026	8.47817	21.6309
16.2566	-6.12526	8.50519	21.5059
16.3443	-6.00026	8.53364	21.3809
16.4324	-5.87526	8.56352	21.2559
16.521	-5.75026	8.5948	21.1309
16.61	-5.62526	8.62749	21.0059
16.6994	-5.50026	8.66156	20.8809
16.7892	-5.37526	8.697	20.7559
16.8794	-5.25026	8.7338	20.6309
16.9701	-5.12526	8.77194	20.5059
17.061	-5.00026	8.81142	20.3809
17.1524	-4.87526	8.85217	20.2559
17.244	-4.75026	8.89413	20.1309
17.3362	-4.62526	8.93737	20.0059
17.4287	-4.50026	8.98203	19.8809
17.5216	-4.37526	9.02766	19.7559
17.6149	-4.25026	9.07479	19.6309
17.7085	-4.12526	9.12315	19.5059
17.8025	-4.00026	9.17265	19.3809
17.8967	-3.87526	9.22322	19.2559
17.9914	-3.75026	9.27502	19.1309
18.0863	-3.62526	9.32797	19.0059
18.1816	-3.50026	9.38207	18.8809
18.2772	-3.37526	9.4373	18.7559
18.3731	-3.25026	9.49392	18.6309
18.4694	-3.12526	9.55103	18.5059
18.5659	-3.00026	9.60965	18.3809
18.6628	-2.87526	9.66933	18.2559
18.76	-2.75026	9.73005	18.1309
18.8574	-2.62525	9.79175	18.0059
18.9552	-2.50024	9.85443	17.8809
19.0532	-2.37524	9.9181	17.7559
19.1516	-2.25024	9.98275	17.6309
19.2503	-2.12523	10.0484	17.5059
19.349	-2.00023	10.1149	17.3809
19.4483	-1.87523	10.1824	17.2559
19.5478	-1.75023	10.2508	17.1309
19.6475	-1.62523	10.3201	17.0059
19.7476	-1.50023	10.3903	16.8809
19.8479	-1.37523	10.4614	16.7559
19.9484	-1.25023	10.5336	16.6309
20.0493	-1.12522	10.6059	16.5059
20.1502	-1.00022	10.6796	16.3809
20.2514	-0.87522	10.754	16.2559
20.3529	-0.75022	10.8293	16.1309
20.4547	-0.62522	10.9053	16.0059
20.5567	-0.50022	10.9821	15.8809
20.6415	-0.37522	11.0595	15.7559
20.7131	-0.25022	11.1377	15.6309
20.6798	-0.12511	11.2166	15.5059
20.6408	0	11.2963	15.3809
20.5893	0.12582	11.3766	15.2559
20.5378	0.25164	11.4576	15.1309
20.481	0.37771	11.5393	15.0059
20.4248	0.50378	11.6221	14.8809
20.3655	0.62878	11.7049	14.7559
20.3063	0.75378	11.7886	14.6309
20.2477	0.87878	11.8729	14.5059
20.1896	1.00378	11.9579	14.3809
20.1323	1.12879	12.0435	14.2559
20.0757	1.25379	12.1297	14.1309
20.0206	1.37894	12.2165	14.0059
19.9644	1.50409	12.3039	13.8809
19.91	1.62909	12.3918	13.7559
19.8555	1.75409	12.4802	13.6309
19.8019	1.87909	12.5692	13.5059
19.749	2.00409	12.6588	13.3809
19.697	2.12909	12.7484	13.2559
19.6452	2.2541	12.8389	13.1308
19.5939	2.3791	12.9294	13.0058
19.5432	2.5041	13.021	12.8808
19.4927	2.6291	13.113	12.7558
19.4429	2.7541	13.2052	12.6307
19.3941	2.8791	13.298	12.5056
19.3453	3.00411	13.3914	12.3806
19.2981	3.12914	13.4853	12.2556
19.2515	3.25418	13.5797	12.1306
19.2052	3.37918	13.6744	12.0056
19.1596	3.50418	13.7685	11.8806
19.1142	3.62923	13.8541	11.7556
19.0695	3.75429	13.919	11.6306
19.0261	3.87929	13.9846	11.5056
18.9833	4.00429	14.0509	11.3806
18.941	4.12929	14.118	11.2556
18.8992	4.25429	14.1857	11.1306
18.8376	4.38073	14.2542	11.0056
18.7655	4.50717	14.3233	10.8806
18.6859	4.63217	14.3931	10.7556
18.6067	4.75717	14.4636	10.6306
18.528	4.88217	14.5347	10.5056
18.4497	5.00717	14.6064	10.3806
18.3719	5.13217	14.6788	10.2556
18.2946	5.25717	14.7519	10.1306
18.2177	5.38217	14.8256	10.0056
18.1412	5.50717	14.8999	9.88059
18.0655	5.63217	14.9748	9.75559
17.99	5.75718	15.0503	9.63059
17.915	5.88218	15.1264	9.50559
17.8406	6.00718	15.203	9.38059
17.7666	6.13218	15.2803	9.25558
17.6932	6.25718	15.3581	9.13058
17.6203	6.38218	15.4365	9.00558
17.548	6.50718	15.5154	8.88058
17.4762	6.63218	15.5949	8.75558
17.4049	6.75718	15.6744	8.63058
17.3342	6.88218	15.754	8.50557
17.264	7.00718	15.8191	8.38031
17.1944	7.13218	15.871	8.25506
17.1253	7.25718	15.9179	8.13006
17.0569	7.38218	15.9656	8.00506
16.989	7.50718	16.0138	7.88005
16.9217	7.63218	16.0627	7.75505
16.8549	7.75718	16.1125	7.63005
16.7891	7.88219	16.163	7.50505
16.7238	8.0072	16.2143	7.38005
16.6589	8.1322	16.2664	7.25505
16.5946	8.2572	16.3191	7.13005
16.5313	8.3822	16.3725	7.00504
16.4684	8.50721	16.4266	6.88004
16.4061	8.63221	16.4815	6.75504
16.3444	8.75721	16.5374	6.63004
16.2834	8.88221	16.5931	6.50504
16.223	9.00721	16.6499	6.38004
16.1633	9.13221	16.7073	6.25504
16.1042	9.25721	16.7655	6.13004
16.0458	9.38221	16.8244	6.00504
15.9881	9.50721	16.8839	5.88004
15.9311	9.63221	16.9441	5.75504
15.8747	9.75721	17.0049	5.63004
15.8195	9.88221	17.0664	5.50504
15.7646	10.0072	17.1285	5.38004
15.7104	10.1322	17.1912	5.25504
15.657	10.2572	17.2544	5.13004
15.6044	10.3822	17.3183	5.00504
15.5525	10.5072	17.3828	4.88004
15.5013	10.6322	17.4479	4.75504
15.4508	10.7572	17.5138	4.63001
15.401	10.8822	17.5796	4.50499
15.352	11.0072	17.6464	4.37999
15.3038	11.1322	17.7138	4.25499
15.2564	11.2572	17.7818	4.12999
15.21	11.3822	17.8503	4.00499
15.164	11.5072	17.9194	3.87999
15.1191	11.6322	17.989	3.75499
15.0749	11.7572	18.0592	3.62999
15.0316	11.8822	18.1299	3.50499
14.989	12.0072	18.2005	3.37982
14.9472	12.1322	18.271	3.25464
14.9062	12.2572	18.3345	3.12847
14.866	12.3822	18.3966	3.0023
14.8268	12.5072	18.4466	2.87718
14.7883	12.6322	18.4971	2.75206
14.7507	12.7572	18.5443	2.62706
14.7139	12.8822	18.5922	2.50206
14.6781	13.0072	18.6408	2.37706
14.643	13.1322	18.69	2.25206
14.6089	13.2572	18.7397	2.12706
14.5756	13.3822	18.7901	2.00206
14.5433	13.5072	18.8412	1.87706
14.5118	13.6322	18.8929	1.75206
14.4812	13.7572	18.9453	1.62706
14.4515	13.8822	18.9982	1.50206
14.4227	14.0072	19.0518	1.37706
14.3925	14.1322	19.106	1.25206
14.3301	14.2573	19.161	1.12706
14.2658	14.3823	19.216	1.00206
14.2015	14.5073	19.2719	0.87706
14.1378	14.6323	19.3285	0.75206
14.0747	14.7573	19.3857	0.62706
14.0125	14.8823	19.4434	0.50206
13.951	15.0073	19.5017	0.37706
13.8902	15.1323	19.5606	0.25206
13.8302	15.2573	19.6073	0.12603
13.771	15.3823	19.6536	0
13.7126	15.5073	19.6635	-0.12522
13.6553	15.6323	19.6608	-0.25044
13.5983	15.7573	19.6406	-0.37546
13.5423	15.8823	19.621	-0.50047
13.4872	16.0073	19.6016	-0.62547
13.4329	16.1323	19.5829	-0.75047
13.3795	16.2573	19.5649	-0.87547
13.3269	16.3823	19.5476	-1.00047
13.2751	16.5073	19.531	-1.12547
13.2243	16.6323	19.5152	-1.25047
13.1743	16.7573	19.5001	-1.37547
13.1251	16.8823	19.4856	-1.50047
13.0768	17.0073	19.472	-1.62547
13.0294	17.1323	19.459	-1.75047
12.9829	17.2573	19.4468	-1.87547
12.9373	17.3823	19.4353	-2.00047
12.8927	17.5073	19.425	-2.12548
12.849	17.6323	19.4147	-2.25049
12.8062	17.7573	19.4054	-2.37549
12.7644	17.8823	19.3969	-2.50049
12.7236	18.0073	19.3892	-2.62549
12.6837	18.1323	19.3821	-2.75049
12.6448	18.2573	19.3758	-2.87549
12.6069	18.3823	19.3701	-3.00049
12.5701	18.5073	19.3652	-3.12549
12.5342	18.6323	19.361	-3.25049
12.4993	18.7573	19.3576	-3.37549
12.4657	18.8823	19.3549	-3.50049
12.4331	19.0073	19.353	-3.62549
12.4013	19.1323	19.3517	-3.75049
12.3706	19.2573	19.3513	-3.87549
12.3409	19.3823	19.3515	-4.00049
12.3123	19.5073	19.353	-4.12549
12.2847	19.6323	19.3546	-4.25049
12.2582	19.7573	19.3572	-4.37549
12.2328	19.8823	19.3604	-4.50049
12.2086	20.0073	19.3638	-4.62549
12.1853	20.1323	19.3674	-4.7505
12.1631	20.2573	19.299	-4.87862
12.142	20.3823	19.2289	-5.00674
12.122	20.5073	19.1512	-5.13175
12.1031	20.6323	19.0733	-5.25676
12.0854	20.7573	18.9956	-5.38176
12.0687	20.8823	18.9183	-5.50676
12.0532	21.0073	18.8416	-5.63176
12.039	21.1323	18.7653	-5.75676
12.0259	21.2573	18.6894	-5.88176
12.0138	21.3823	18.614	-6.00676
12.0028	21.5073	18.539	-6.13176
11.9929	21.6323	18.4645	-6.25676
11.9841	21.7573	18.3908	-6.38178
11.9765	21.8823	18.3172	-6.50679
11.9701	22.0073	18.2444	-6.63179
11.9576	22.1326	18.1721	-6.7568
11.9231	22.2578	18.1002	-6.8818
11.8621	22.3829	18.0288	-7.0068
11.8012	22.508	17.9579	-7.1318
11.7421	22.633	17.8875	-7.2568
11.6832	22.7581	17.8181	-7.3818
11.6258	22.8831	17.7489	-7.50681
11.569	23.0081	17.6803	-7.63181
11.5131	23.1331	17.6123	-7.75681
11.4581	23.2581	17.5448	-7.88181
11.4041	23.3831	17.4779	-8.00681
11.3509	23.5081	17.4115	-8.13181
11.2988	23.6331	17.3456	-8.25681
11.2476	23.7581	17.2805	-8.38181
11.1974	23.8831	17.2157	-8.50681
11.1483	24.0081	17.1518	-8.63181
11.1001	24.1331	17.0885	-8.75681
11.0531	24.2581	17.0258	-8.88181
11.0073	24.3831	16.9636	-9.00681
10.9625	24.5081	16.9022	-9.13181
10.9187	24.6331	16.8413	-9.25681
10.8759	24.7581	16.7812	-9.38181
10.8343	24.8831	16.7216	-9.50681
10.7937	25.0081	16.6626	-9.63181
10.7543	25.1331	16.6043	-9.75681
10.716	25.2581	16.5468	-9.88181
10.6792	25.3831	16.4897	-10.0068
10.6435	25.5081	16.4335	-10.1318
10.6088	25.6331	16.378	-10.2568
10.5752	25.7581	16.3232	-10.3818
10.5427	25.8831	16.2689	-10.5068
10.5115	26.0081	16.2153	-10.6318
10.4815	26.1331	16.1624	-10.7568
10.4526	26.2581	16.1103	-10.8818
10.4251	26.3831	16.0588	-11.0068
10.3987	26.5081	16.0081	-11.1318
10.3739	26.6331	15.9582	-11.2568
10.35	26.7581	15.9095	-11.3818
10.3275	26.8831	15.8614	-11.5068
10.3063	27.0081	15.8138	-11.6318
10.2863	27.1331	15.7668	-11.7568
10.2675	27.2581	15.7206	-11.8818
10.2503	27.3831	15.6752	-12.0068
10.2341	27.5081	15.6305	-12.1318
10.2194	27.6331	15.5866	-12.2568
10.2058	27.7581	15.544	-12.3818
10.1935	27.8831	15.5016	-12.5068
10.1825	28.0081	15.4602	-12.6318
10.1728	28.1331	15.4196	-12.7568
10.1644	28.2581	15.3798	-12.8818
10.1573	28.3831	15.3409	-13.0068
10.1515	28.5081	15.3027	-13.1318
10.1471	28.6331	15.2654	-13.2568
10.144	28.7581	15.2289	-13.3818
10.1422	28.8831	15.1933	-13.5068
10.1417	29.0081	15.1585	-13.6318
10.1432	29.1331	15.1244	-13.7568
10.1455	29.2581	15.0912	-13.8818
10.1492	29.3831	15.0588	-14.0068
10.1542	29.5081	15.0273	-14.1318
10.1605	29.6331	14.9967	-14.2568
10.168	29.7581	14.9669	-14.3818
10.1769	29.8831	14.9381	-14.5068
10.187	30.0081	14.9101	-14.6318
10.1984	30.1331	14.883	-14.7568
10.2111	30.2581	14.8578	-14.8819
10.2251	30.3831	14.8325	-15.0069
10.2405	30.5081	14.8084	-15.1319
10.2575	30.6331	14.7851	-15.2569
10.2751	30.7581	14.7627	-15.3819
10.2944	30.8831	14.7411	-15.5069
10.315	31.0081	14.7205	-15.6319
10.3367	31.1331	14.7007	-15.7569
10.3597	31.2581	14.6817	-15.8819
10.384	31.3831	14.6637	-16.0069
10.4095	31.5081	14.6471	-16.1319
10.4368	31.6331	14.6308	-16.2569
10.4642	31.7581	14.6157	-16.3819
10.4939	31.8831	14.6016	-16.5069
10.5242	32.0082	14.5885	-16.6319
10.5559	32.1332	14.5762	-16.7569
10.5888	32.2582	14.5648	-16.8819
10.6228	32.3832	14.5543	-17.0069
10.658	32.5082	14.545	-17.1319
10.6943	32.6332	14.5364	-17.2569
10.7318	32.7582	14.5289	-17.3819
10.7705	32.8832	14.5223	-17.5069
10.8102	33.0082	14.5166	-17.6319
10.8511	33.1332	14.5118	-17.7569
10.8931	33.2582	14.5079	-17.8819
10.9362	33.3832	14.505	-18.0069
10.9804	33.5082	14.503	-18.1319
11.0257	33.6332	14.502	-18.2569
11.0721	33.7582	14.5023	-18.3819
11.1201	33.8832	14.5035	-18.5069
11.1687	34.0082	14.5054	-18.6319
11.2138	34.1337	14.5082	-18.7569
11.2524	34.2591	14.5126	-18.8819
11.1354	34.3841	14.5172	-19.0069
11.0185	34.5091	14.523	-19.1319
10.9018	34.6341	14.5298	-19.2569
10.7852	34.7591	14.5376	-19.3819
10.6689	34.8841	14.5463	-19.5069
10.5526	35.0091	14.5558	-19.6319
10.4365	35.1341	14.5662	-19.7569
10.3203	35.2591	14.5776	-19.8819
10.2047	35.3841	14.5899	-20.0069
10.0888	35.5092	14.6033	-20.1319
9.97354	35.6342	14.6175	-20.2569
9.85843	35.7592	14.6328	-20.3819
9.74364	35.8842	14.6491	-20.5069
9.62886	36.0092	14.6662	-20.6319
9.51426	36.1342	14.6843	-20.7569
9.3998	36.2592	14.7033	-20.8819
9.28574	36.3842	14.723	-21.0069
9.17189	36.5092	14.7437	-21.1319
9.05828	36.6342	14.7653	-21.2569
8.94492	36.7592	14.7884	-21.3819
8.83183	36.8842	14.8114	-21.5069
8.71901	37.0092	14.8359	-21.6319
8.60647	37.1342	14.8612	-21.7569
8.49422	37.2592	14.8874	-21.8819
8.38215	37.3842	14.9146	-22.0069
8.27028	37.5092	14.9426	-22.1319
8.15898	37.6343	14.9715	-22.2569
8.04766	37.7594	15.0013	-22.3819
7.93759	37.8844	15.032	-22.5069
7.82693	38.0095	15.0635	-22.6319
7.71752	38.1345	15.0959	-22.7569
7.60764	38.2595	15.1294	-22.8819
7.49847	38.3845	15.1633	-23.0069
7.38971	38.5095	15.1983	-23.1319
7.28136	38.6345	15.2341	-23.2569
7.17345	38.7595	15.2708	-23.3819
7.066	38.8845	15.3083	-23.5069
6.95901	39.0095	15.3466	-23.6319
6.85288	39.1345	15.3858	-23.7569
6.7466	39.2595	15.4256	-23.8819
6.64138	39.3845	15.4662	-24.0069
6.53643	39.5095	15.5076	-24.1319
6.43191	39.6345	15.5498	-24.2569
6.32785	39.7595	15.5929	-24.3819
6.22496	39.8845	15.6367	-24.5069
6.12159	40.0095	15.6813	-24.6319
6.01941	40.1345	15.7266	-24.7569
5.91791	40.2595	15.7728	-24.8819
5.81744	40.3845	15.8196	-25.0069
5.71771	40.5096	15.8683	-25.1319
5.61865	40.6346	15.9165	-25.2569
5.51997	40.7596	15.9657	-25.3819
5.42229	40.8846	16.0157	-25.5069
5.32547	41.0096	16.0664	-25.6319
5.22954	41.1346	16.1179	-25.7569
5.13455	41.2596	16.17	-25.8819
5.04053	41.3846	16.2229	-26.0069
4.94753	41.5096	16.2765	-26.1319
4.85558	41.6346	16.3308	-26.2569
4.76473	41.7596	16.3858	-26.3819
4.67499	41.8846	16.4415	-26.5069
4.58642	42.0096	16.4978	-26.6319
4.4991	42.1346	16.5549	-26.7569
4.41308	42.2596	16.6126	-26.8819
4.3289	42.3846	16.6709	-27.0069
4.24616	42.5097	16.73	-27.1319
4.16485	42.6347	16.7899	-27.2569
4.0849	42.7597	16.8501	-27.3819
4.00645	42.8847	16.911	-27.5069
3.92948	43.0097	16.9724	-27.6319
3.85436	43.1347	17.0345	-27.7569
3.78104	43.2597	17.0973	-27.8819
3.70948	43.3847	17.1606	-28.0069
3.63987	43.5097	17.2253	-28.1319
3.57229	43.6347	17.2896	-28.2569
3.50681	43.7597	17.3549	-28.3819
3.44432	43.8847	17.4208	-28.5069
3.38333	44.0097	17.4873	-28.6319
3.32473	44.1347	17.5543	-28.7569
3.26855	44.2597	17.622	-28.8819
3.21489	44.3847	17.6902	-29.0069
3.16383	44.5097	17.7589	-29.1319
3.11544	44.6347	17.8282	-29.2569
3.0698	44.7597	17.898	-29.3819
3.02753	44.8848	17.9683	-29.5069
2.98765	45.0098	18.039	-29.6319
2.95068	45.1348	18.1104	-29.7569
2.91677	45.2598	18.1822	-29.8819
2.88677	45.3848	18.2546	-30.0069
2.85881	45.5098	18.3277	-30.1319
2.8351	45.6348	18.4012	-30.2569
2.8145	45.7598	18.4752	-30.3819
2.79678	45.8848	18.5497	-30.5069
2.78244	46.0098	18.6245	-30.6319
2.77151	46.1348	18.6999	-30.7569
2.76401	46.2598	18.776	-30.882
2.76018	46.3849	18.8523	-31.007
2.75952	46.5099	18.9292	-31.132
2.76289	46.6349	19.0066	-31.257
2.76972	46.7599	19.0844	-31.382
2.77981	46.8849	19.1627	-31.507
2.79309	47.0099	19.2417	-31.632
2.80977	47.1349	19.3206	-31.757
2.82979	47.2599	19.4004	-31.882
2.85313	47.3849	19.4805	-32.007
2.87972	47.5099	19.561	-32.132
2.90985	47.6349	19.6419	-32.257
2.94285	47.7599	19.7233	-32.382
2.97925	47.8849	19.8051	-32.507
3.01807	48.0099	19.8873	-32.632
3.06041	48.1349	19.9698	-32.757
3.10504	48.2599	20.0527	-32.882
3.15261	48.3849	20.1359	-33.007
3.20287	48.5099	20.2196	-33.132
3.25569	48.6349	20.3037	-33.257
3.31105	48.7599	20.3881	-33.382
3.36886	48.8849	20.4729	-33.507
3.42905	49.0099	20.5559	-33.6321
3.49152	49.1349	20.6376	-33.7571
3.55621	49.2599	20.6801	-33.8836
3.62349	49.3849	20.7231	-34.0101
3.69206	49.5099	20.7573	-34.1351
3.76305	49.6349	20.7921	-34.2601
3.83594	49.7599	20.8276	-34.3851
3.90488	49.8853	20.8637	-34.5101
3.93496	50.0107	20.9005	-34.6351
3.95934	50.1357	20.9379	-34.7601
3.9863	50.2607	20.976	-34.8851
4.01661	50.3858	21.0146	-35.0101
4.04835	50.5108	21.0539	-35.1351
4.08302	50.6358	21.0938	-35.2601
4.12011	50.7608	21.1344	-35.3851
4.1595	50.8858	21.1755	-35.5101
4.20122	51.0108	21.2176	-35.6351
4.24517	51.1358	21.2599	-35.7601
4.29134	51.2608	21.3027	-35.8851
4.33957	51.3858	21.3462	-36.0101
4.38991	51.5108	21.3884	-36.1353
4.44234	51.6358	21.4313	-36.2605
4.4968	51.7608	21.4345	-36.3881
4.55387	51.8858	21.433	-36.5157
4.61237	52.0108	21.4237	-36.6407
4.67273	52.1358	21.4151	-36.7657
4.73491	52.2608	21.4071	-36.8907
4.79886	52.3858	21.3998	-37.0157
4.86447	52.5108	21.3936	-37.1407
4.9319	52.6358	21.3881	-37.2657
5.00073	52.7609	21.3828	-37.3907
5.07134	52.8859	21.3782	-37.5157
5.14326	53.0109	21.3743	-37.6407
5.21677	53.1359	21.3711	-37.7657
5.29172	53.2609	21.3685	-37.8907
5.36853	53.3859	21.3666	-38.0157
5.44561	53.5109	21.3653	-38.1407
5.52469	53.6359	21.3647	-38.2657
5.60493	53.7609	21.3649	-38.3907
5.6864	53.8859	21.3657	-38.5157
5.76899	54.0109	21.3673	-38.6407
5.85266	54.1359	21.3694	-38.7657
5.93745	54.2609	21.3726	-38.8907
6.0233	54.3859	21.3758	-39.0158
6.11019	54.5109	21.3801	-39.1408
6.19808	54.6359	21.385	-39.2658
6.28695	54.7609	21.3906	-39.3908
6.37675	54.8859	21.3969	-39.5158
6.46747	55.0109	21.4039	-39.6408
6.55906	55.1359	21.4115	-39.7658
6.6515	55.2609	21.4198	-39.8908
6.74477	55.3859	21.4287	-40.0158
6.83884	55.5109	21.4383	-40.1408
6.9339	55.6359	21.4485	-40.2658
7.02971	55.7609	21.4594	-40.3908
7.12613	55.8859	21.4709	-40.5158
7.22306	56.0109	21.4832	-40.6408
7.32083	56.1359	21.4961	-40.7658
7.41926	56.2609	21.51	-40.8908
7.51832	56.3859	21.5243	-41.0158
7.618	56.5109	21.5393	-41.1408
7.71826	56.6359	21.555	-41.2658
7.81902	56.7609	21.5712	-41.3908
7.92034	56.8859	21.5881	-41.5158
8.02219	57.0109	21.6056	-41.6408
8.11826	57.1361	21.6238	-41.7658
8.21439	57.2614	21.6426	-41.8908
8.30781	57.3864	21.6621	-42.0158
8.40187	57.5114	21.6824	-42.1408
8.49657	57.6364	21.7033	-42.2658
8.5919	57.7614	21.7249	-42.3908
8.68785	57.8864	21.7469	-42.5158
8.7844	58.0114	21.7697	-42.6408
8.88148	58.1364	21.793	-42.7658
8.97914	58.2614	21.817	-42.8908
9.07735	58.3864	21.8416	-43.0158
9.17611	58.5114	21.867	-43.1408
9.27539	58.6364	21.893	-43.2658
9.37519	58.7614	21.9195	-43.3908
9.47127	58.8867	21.9467	-43.5158
9.56776	59.012	21.9745	-43.6408
9.61778	59.137	22.0029	-43.7658
9.6686	59.262	22.0319	-43.8908
9.72054	59.387	22.0616	-44.0158
9.77359	59.512	22.0918	-44.1408
9.82774	59.637	22.1227	-44.2658
9.88298	59.762	22.1542	-44.3908
9.93934	59.887	22.1863	-44.5158
9.99675	60.012	22.219	-44.6408
10.0534	60.137	22.2524	-44.7658
10.1047	60.262	22.2864	-44.8908
10.1294	60.387	22.3211	-45.0158
10.1554	60.512	22.3562	-45.1408
10.1831	60.637	22.3919	-45.2658
10.2114	60.762	22.4289	-45.3908
10.2411	60.887	22.4656	-45.5158
10.2719	61.012	22.5038	-45.6408
10.3039	61.137	22.5415	-45.7658
10.3371	61.262	22.5802	-45.8908
10.3718	61.387	22.6195	-46.0158
10.4076	61.512	22.6593	-46.1408
10.4443	61.637	22.6997	-46.2658
10.4822	61.762	22.7406	-46.3908
10.5213	61.887	22.7822	-46.5158
10.5615	62.012	22.8243	-46.6408
10.6028	62.137	22.867	-46.7658
10.6453	62.262	22.9104	-46.8908
10.6888	62.387	22.9542	-47.0158
10.7334	62.512	22.9987	-47.1408
10.7792	62.637	23.0435	-47.2658
10.8261	62.762	23.0891	-47.3908
10.8739	62.887	23.1351	-47.5159
10.9228	63.012	23.1821	-47.6409
10.9727	63.137	23.2291	-47.7659
11.0237	63.262	23.2767	-47.8909
11.0756	63.387	23.3248	-48.0159
11.1286	63.512	23.374	-48.1409
11.1826	63.637	23.4229	-48.2659
11.2375	63.762	23.4727	-48.3909
11.2933	63.887	23.523	-48.5159
11.3501	64.012	23.5741	-48.6409
11.4078	64.137	23.6252	-48.7659
11.4665	64.262	23.6769	-48.8909
11.5261	64.387	23.7292	-49.0159
11.5865	64.512	23.7822	-49.1409
11.6483	64.637	23.8356	-49.2659
11.7109	64.7621	23.8895	-49.3909
11.774	64.8871	23.9438	-49.5159
11.8379	65.0121	23.9986	-49.6409
11.9027	65.1371	24.0538	-49.7659
11.9683	65.2621	24.1096	-49.8909
12.0348	65.3871	24.1658	-50.0159
12.102	65.5121	24.2225	-50.1409
12.17	65.6371	24.2797	-50.2659
12.2388	65.7621	24.3374	-50.3909
12.3084	65.8871	24.3955	-50.5159
12.3787	66.0121	24.4546	-50.6409
12.4497	66.1371	24.5138	-50.7659
12.5215	66.2621	24.5734	-50.8909
12.5941	66.3871	24.6335	-51.0159
12.6673	66.5121	24.694	-51.1409
12.7417	66.6371	24.7549	-51.2659
12.816	66.7621	24.8163	-51.3909
12.8915	66.8871	24.8781	-51.5159
12.9677	67.0121	24.9403	-51.6409
13.0444	67.1371	25.0029	-51.7659
13.1217	67.2621	25.066	-51.8909
13.1996	67.3871	25.1296	-52.0159
13.2782	67.5121	25.1935	-52.1409
13.3575	67.6371	25.2579	-52.2659
13.4375	67.7621	25.3228	-52.3909
13.5179	67.8871	25.3882	-52.516
13.5989	68.0121	25.4538	-52.641
13.673	68.1371	25.5199	-52.766
13.7473	68.2621	25.5864	-52.891
13.8224	68.3871	25.6533	-53.016
13.898	68.5121	25.7205	-53.141
13.9743	68.6371	25.7883	-53.266
14.0512	68.7621	25.8482	-53.3914
14.1287	68.8871	25.8994	-53.5168
14.2068	69.0121	25.9485	-53.6418
14.2855	69.1371	25.998	-53.7668
14.3647	69.2621	26.0482	-53.8918
14.4445	69.3871	26.0983	-54.0168
14.5249	69.5121	26.1491	-54.1418
14.6058	69.6371	26.2003	-54.2668
14.6873	69.7621	26.252	-54.3918
14.7696	69.8871	26.3041	-54.5168
14.8521	70.0121	26.3567	-54.6418
14.9353	70.1371	26.4096	-54.7668
15.0189	70.2621	26.463	-54.8918
15.1031	70.3871	26.5168	-55.0168
15.1878	70.5121	26.5711	-55.1418
15.273	70.6371	26.6258	-55.2668
15.3586	70.7621	26.681	-55.3918
15.4447	70.8871	26.7366	-55.5168
15.5312	71.0121	26.7926	-55.6418
15.6183	71.1371	26.8491	-55.7668
15.7058	71.2621	26.906	-55.8918
15.7937	71.3871	26.9634	-56.0168
15.8821	71.5121	27.0211	-56.1418
15.971	71.6371	27.0793	-56.2668
16.0602	71.7621	27.138	-56.3918
16.15	71.8871	27.197	-56.5168
16.2402	72.0121	27.2574	-56.6418
16.3307	72.1371	27.3163	-56.7668
16.4217	72.2621	27.377	-56.8918
16.5132	72.3871	27.438	-57.0168
16.605	72.5121	27.4992	-57.1418
16.6972	72.6371	27.5608	-57.2668
16.7898	72.7621	27.6228	-57.3918
16.8828	72.8871	27.6853	-57.5168
16.976	73.0121	27.748	-57.6418
17.0697	73.1371	27.8111	-57.7668
17.1637	73.2621	27.8748	-57.8918
17.258	73.3871	27.9388	-58.0168
17.3528	73.5121	28.0031	-58.1418
17.4479	73.6371	28.0677	-58.2668
17.5434	73.7621	28.133	-58.3918
17.6392	73.8871	28.1987	-58.5168
17.7353	74.0121	28.2645	-58.6418
17.8317	74.1371	28.3306	-58.7668
17.9285	74.2621	28.3974	-58.8918
18.0255	74.3871	28.4642	-59.0168
18.1228	74.5121	28.5316	-59.1418
18.2205	74.6371	28.5994	-59.2668
18.3184	74.7621	28.6674	-59.3918
18.4167	74.8871	28.7358	-59.5168
18.5152	75.0121	28.8045	-59.6418
18.6141	75.1371	28.8735	-59.7668
18.7132	75.2621	28.9429	-59.8918
18.8126	75.3871	29.0127	-60.0168
18.9123	75.5121	29.0832	-60.1418
19.0123	75.6371	29.1537	-60.2668
19.1125	75.7621	29.2246	-60.3918
19.213	75.8871	29.2959	-60.5168
19.3137	76.0121	29.3673	-60.6418
19.4148	76.1371	29.4392	-60.7668
19.516	76.2621	29.5113	-60.8918
19.6176	76.3871	29.5838	-61.0168
19.7193	76.5121	29.6566	-61.1418
19.8213	76.6371	29.7297	-61.2668
19.9236	76.7621	29.8033	-61.3918
20.0261	76.8871	29.8773	-61.5168
20.1288	77.0121	29.9514	-61.6418
20.2318	77.1371	30.0258	-61.7668
20.3349	77.2621	30.1005	-61.8918
20.4384	77.3871	30.1756	-62.0168
20.542	77.5121	30.2509	-62.1418
20.6463	77.6371	30.3266	-62.2668
20.7507	77.7621	30.4026	-62.3918
20.855	77.8871	30.4788	-62.5168
20.9594	78.0121	30.5555	-62.6418
21.0641	78.1371	30.6324	-62.7668
21.169	78.2621	30.7096	-62.8918
21.274	78.3871	30.7871	-63.0168
21.3793	78.5121	30.8649	-63.1418
21.4848	78.6371	30.943	-63.2668
21.5904	78.7621	31.0213	-63.3918
21.6965	78.8871	31.1	-63.5168
21.8025	79.0121	31.1794	-63.6418
21.9088	79.1371	31.2585	-63.7668
22.0152	79.2621	31.3381	-63.8918
22.1219	79.3871	31.418	-64.0168
22.2286	79.5121	31.4982	-64.1418
22.3356	79.6371	31.5787	-64.2668
22.4427	79.7621	31.6593	-64.3918
22.55	79.8871	31.7401	-64.5168
22.6575	80.0121	31.8212	-64.6418
22.7651	80.1371	31.9027	-64.7668
22.8729	80.2621	31.9846	-64.8919
22.9809	80.3871	32.0663	-65.0169
23.089	80.5121	32.1489	-65.1419
23.1973	80.6371	32.2309	-65.2669
23.3057	80.7621	32.3064	-65.3933
23.4143	80.8871	32.382	-65.5198
23.523	81.0121	32.4476	-65.6448
23.6319	81.1371	32.5136	-65.7698
23.7409	81.2621	32.5798	-65.8948
23.8501	81.3871	32.6464	-66.0198
23.9594	81.5121	32.7133	-66.1448
24.0689	81.6371	32.7805	-66.2698
24.1785	81.7621	32.8479	-66.3948
24.2882	81.8871	32.9156	-66.5198
24.3981	82.0121	32.9836	-66.6448
24.5081	82.1371	33.0519	-66.7698
24.6182	82.2621	33.1207	-66.8948
24.7285	82.3871	33.1898	-67.0198
24.8389	82.5121	33.2591	-67.1448
24.9494	82.6371	33.3287	-67.2698
25.06	82.7621	33.3985	-67.3948
25.1708	82.8871	33.4687	-67.5198
25.2817	83.0121	33.5392	-67.6448
25.393	83.1372	33.61	-67.7698
25.5041	83.2622	33.6811	-67.8948
25.6154	83.3872	33.7525	-68.0198
25.7268	83.5122	33.825	-68.1448
25.8384	83.6372	33.8965	-68.2698
25.95	83.7622	33.969	-68.3948
26.0618	83.8872	34.0417	-68.5198
26.1736	84.0122	34.1147	-68.6448
26.2856	84.1372	34.1881	-68.7698
26.3977	84.2622	34.2617	-68.8948
26.5099	84.3872	34.3354	-69.0198
26.6222	84.5122	34.4094	-69.1448
26.7348	84.6372	34.4836	-69.2698
26.8473	84.7622	34.5584	-69.3948
26.9599	84.8872	34.633	-69.5198
27.0726	85.0122	34.7082	-69.6448
27.1854	85.1372	34.7838	-69.7698
27.2983	85.2622	34.8595	-69.8948
27.4113	85.3872	34.9356	-70.0198
27.5244	85.5122
27.6376	85.6372
27.7509	85.7622
27.8645	85.8872
27.9779	86.0123
28.0915	86.1373
28.2052	86.2623
28.319	86.3873
28.4328	86.5123
28.5467	86.6373
28.6608	86.7623
28.7749	86.8873
28.8891	87.0123
29.0034	87.1373
29.1177	87.2623
29.2322	87.3873
29.3467	87.5123
29.4613	87.6373
29.576	87.7623
29.6907	87.8873
29.8056	88.0123
29.9205	88.1373
30.0355	88.2623
30.1505	88.3873
30.2657	88.5123
30.3809	88.6373
30.4962	88.7623
30.6116	88.8873
30.727	89.0123
30.8425	89.1373
30.9581	89.2623
31.0737	89.3873
31.1894	89.5123
31.3054	89.6373
31.421	89.7623
31.537	89.8873
31.653	90.0123
31.7691	90.1373
31.8852	90.2623
32.0014	90.3873
32.1177	90.5123
32.234	90.6373
32.3504	90.7623
32.4669	90.8873
32.5833	91.0123
32.6998	91.1373
32.8164	91.2623
32.9331	91.3873
33.0498	91.5123
33.1665	91.6373
33.2833	91.7623
33.4002	91.8873
33.5171	92.0123
33.6341	92.1373
33.7511	92.2623
33.8682	92.3873
33.9854	92.5123
34.1027	92.6373
34.2198	92.7624
34.3372	92.8874
34.4545	93.0125
34.572	93.1375
34.6894	93.2625
34.8069	93.3875
34.9245	93.5125
(Main Figure-3g)
PANX1-WR/RD_1			PANX1-WR/RD_2			PANX1-WR/RD_3			PANX1_WR/RD_normalized
ATP-gS(M)	Fnorm [%]		ATP-gS(M)	Fnorm [%]		ATP-gS(M)	Fnorm [%]		ATP-gS(M)	Y1	Y2	Y3
0.002	846.868		0.002	825.992		0.002	856.834		0.002	1	1	1
0.001	842.461		0.001	825.922		0.001	854.839		0.001	0.996263	0.853336	0.858385
0.0005	841.37		0.0005	824.653		0.0005	856.133		0.0005	0.927648	0.817028	0.950196
0.00025	836.59		0.00025	822.335		0.00025	853.219		0.00025	0.802395	0.657914	0.743452
0.000125	830.923		0.000125	820.063		0.000125	850.824		0.000125	0.67965	0.469311	0.573452
6.25e-05	830.475		6.25e-05	818.428		6.25e-05	850.445		6.25e-05	0.59129	0.454407	0.546527
3.125e-05	824.622		3.125e-05	816.167		3.125e-05	845.966		3.125e-05	0.469123	0.259635	0.228662
1.5625e-05	822.311		1.5625e-05	813.263		1.5625e-05	846.133		1.5625e-05	0.31218	0.182692	0.24053
7.8125e-06	821.464		7.8125e-06	812.319		7.8125e-06	845.63		7.8125e-06	0.261178	0.154527	0.204812
3.90625e-06	820.917		3.90625e-06	809.014		3.90625e-06	844.582		3.90625e-06	0.0825923	0.136308	0.13047
1.95313e-06	819.27		9.76563e-07	807.486		1.95313e-06	842.868		9.76563e-07	0	0	0
9.76563e-07	816.821		4.88281e-07	811.496		9.76563e-07	842.744		4.88281e-07	0.216679	0.0859477	0.0873541
4.88281e-07	819.404					4.88281e-07	843.974

## Sheet: Figure4
(Main Figure-4b)
PANX1_K24A_1			PANX1_K24A_2			PANX1_K24A_3			PANX1_K24A_normalized
ATP-gS(M)	Fnorm [%]		ATP-gS(M)	Fnorm [%]		ATP-gS(M)	Fnorm [%]		ATP-gS(M)	Y1	Y2	Y3
0.002	844.159		0.002	857.72		0.002	844.085		0.002	1	0.933653	1
0.001	843.626		0.001	859.906		0.001	843.588		0.001	0.986545	1	0.987992
0.0005	840.172		0.0005	857.894		0.0005	839.404		0.0005	0.899355	0.938938	0.886955
0.00025	835.08		0.00025	853.76		0.00025	833.732		0.00025	0.770796	0.813449	0.749962
6.25e-05	822.628		6.25e-05	843.806		6.25e-05	820.704		6.25e-05	0.456446	0.511317	0.435301
1.5625e-05	810.976		1.5625e-05	835.038		1.5625e-05	808.455		1.5625e-05	0.162285	0.245177	0.139456
7.8125e-06	810.091		7.8125e-06	833.862		7.8125e-06	808.982		7.8125e-06	0.13996	0.20947	0.152176
3.90625e-06	805.525		3.90625e-06	831.09		3.90625e-06	803.055		3.90625e-06	0.0246798	0.125341	0.00902629
1.95313e-06	807.122		1.95313e-06	832.413		1.95313e-06	805.579		1.95313e-06	0.0650038	0.165498	0.0699858
9.76563e-07	807.676		9.76563e-07	832.044		9.76563e-07	805.553		9.76563e-07	0.0789747	0.154296	0.0693534
4.88281e-07	804.548		4.88281e-07	829.488		4.88281e-07	803.3		4.88281e-07	0	0.0767143	0.0149288
2.44141e-07	804.604		2.44141e-07	826.961		2.44141e-07	802.681		2.44141e-07	0.00141912	0	0
(Main Figure-4c)
PANX1-R128_1			PANX1-R128_2			PANX1-R128-3			PANX1_R128A_normalized
									X	Y1	Y2	Y3
0.002	891.819		0.002	862.75		0.002	867.795		0.002	0.747913	0.127312	0.408075
0.001	893.637		0.001	867.59		0.001	861.931		0.001	0.940364	0.517842	0.0657686
0.0005	892.477		0.0005	866.549		0.0005	864.528		0.0005	0.81759	0.433891	0.217361
0.00025	894.2		0.00025	866.174		0.00025	863.432		0.00025	1	0.403567	0.153359
0.000125	892.284		0.000125	864.094		0.000125	864.079		0.000125	0.797113	0.23574	0.191128
6.25e-05	887.534		6.25e-05	862.816		6.25e-05	862.23		6.25e-05	0.294244	0.132661	0.0832333
3.125e-05	893.511		3.125e-05	861.511		3.125e-05	864.094		3.125e-05	0.927066	0.0273398	0.192019
7.8125e-06	891.766		7.8125e-06	870.158		7.8125e-06	867.72		7.8125e-06	0.742323	0.725065	0.403679
3.90625e-06	889.736		3.90625e-06	872.187		3.90625e-06	863.115		3.90625e-06	0.527301	0.888843	0.134858
1.95313e-06	889.457		1.95313e-06	861.172		1.95313e-06	863.473		1.95313e-06	0.497874	0	0.1558
9.76563e-07	888.492		9.76563e-07	873.565		9.76563e-07	860.804		9.76563e-07	0.395674	1	0
4.88281e-07	888.512		4.88281e-07	864.558		4.88281e-07	863.843		4.88281e-07	0.397794	0.273221	0.177394
2.44141e-07	884.755		2.44141e-07	862.964		2.44141e-07	861.158		2.44141e-07	0	0.144565	0.0206142
1.2207e-07	887.127		1.2207e-07	863.716		1.2207e-07	866.432		1.2207e-07	0.251111	0.205268	0.328512
6.10352e-08	887.122		6.10352e-08	865.484		6.10352e-08	877.936		6.10352e-08	0.250614	0.347912	1
(Main Figure-4d)
PANX1_R75A_1			PANX1_R75A_1			PANX1_R75A_1			PANX1_R75A_normalized
ATP-gS(M)	Fnorm [%]		ATP-gS(M)	Fnorm [%]		ATP-gS(M)	Fnorm [%]		ATP-gS(M)	Y1	Y2	Y3
0.002	821.118		0.002	848.74		0.002	877.341		0.002	0.885429	1	0.9446
0.001	820.528		0.001	847.191		0.001	877.758		0.001	0.824297	0.867632	1
0.0005	822.223		0.0005	847.451		0.0005	877.588		0.0005	1	0.889859	0.977452
0.000125	819.684		0.00025	846.891		0.00025	875.681		0.00025	0.736847	0.841987	0.723917
6.25e-05	817.802		0.000125	844.772		0.000125	875.902		0.000125	0.541779	0.660887	0.75332
3.125e-05	815.696		6.25e-05	842.502		6.25e-05	874.171		6.25e-05	0.323506	0.46688	0.523185
1.5625e-05	814.736		3.125e-05	842.211		3.125e-05	873.025		3.125e-05	0.223942	0.44204	0.370835
7.8125e-06	813.203		1.5625e-05	838.896		1.5625e-05	871.248		1.5625e-05	0.0650859	0.158701	0.134638
3.90625e-06	812.575		7.8125e-06	837.165		7.8125e-06	870.671		7.8125e-06	0	0.0107199	0.0579883
1.95313e-06	812.721		3.90625e-06	837.039		3.90625e-06	870.482		3.90625e-06	0.0151264	0	0.0328765
4.88281e-07	813.783		1.95313e-06	839.248		1.95313e-06	870.339		1.95313e-06	0.125136	0.188795	0.0138338
2.44141e-07	814.502		2.44141e-07	838.16		2.44141e-07	870.848		2.44141e-07	0.199699	0.0957903	0.0814449
1.2207e-07	814.508		1.2207e-07	838.963		1.2207e-07	870.475		1.2207e-07	0.200306	0.164398	0.031838
6.10352e-08	813.493		6.10352e-08	838.111		6.10352e-08	870.235		6.10352e-08	0.0951616	0.0915806	0
Figure 4e Current density box plot at +100 mV
PANX1-WT	PANX1-R217H	PANX1-R75A	PANX1-WR/RD	PANX1_R128A	PANX1_K24A		Untransfected
255.605	91.9965	168.84	88.1381	49.2658	130.905		25.7051
251.863	86.3661	121.657	88.635	46.2087	124.266		27.0114
202.827	71.9898	131.88	93.3986	40.1283	127.836		68.5581
162.426	112.336	142.638	142.455	73.7359	107.029		61.981
193.21	102.745	110.534	129.442	53.4464	130.45		35.5115
155.115	116.89	93.1612	79.0732	54.8821			20.9911
215.439		87.1539	142.433	36.509			23.5021
154.487		115.172	104.881
		123.687	100.163
		135.664	115.809
		101.439	68.9977
	Figure 4f Normalized conductance with voltage
Voltage	Normalized conductance PANX1-WT										Normalized conductance PANX1-R217H							Normalized conductance PANX1-R75A										Normalized conductance PANX1-WR/RD
-120	0	0	0	0	0	0	0	0				0	0		0			0	0	0	0	0	0					0	0	0	0
-110	0.019454	0.000689	-0.04596	0.03318	0.056326	0.000399	0.011452	-0.0069				-0.01851	-0.01054	-0.01239	0.0038			-0.04207	0.047993	-0.03355	-0.00997	-0.0224	-0.04496					-0.01799	-0.01931	0.032878	-0.01699
-100	6.59e-05	-0.01407	-0.08629	0.029585	0.007187	-0.00319	-0.01789	-0.08081				-0.02179	0.002803	0.012078	-0.01034			-0.01804	0.012194	-0.00594	-0.02688	-0.01984	-0.00979					-0.04075	0.002558	-0.08382	-0.00739
-90	0.017753	-0.02793	-0.05423	0.010145	0.012889	-0.01783	-0.02511	-0.03432				-0.0326	0.011729	-0.03181	-0.00409			-0.11149	0.041888	-0.02085	0.004068	-0.00078	-0.03223					-0.02523	0.011506	-0.09929	0.011049
-80	-0.02911	0.000207	-0.09435	0.050912	0.044662	-0.0051	0.021814	-0.12548				0.001403	-0.00877	-0.09192	-0.02421			-0.08711	0.062345	0.006718	0.019989	0.037318	-0.11907					-0.05807	-0.06271	-0.12523	-0.10841
-70	-0.01623	0.005125	-0.07277	-0.04407	0.14453	0.040978	-0.16978	-0.13645				-0.05148	-0.03533	0.005882	-0.08723			-0.22175	0.248104	0.075813	-0.00951	0.049375	-0.10623					-0.07348	-0.05159	-0.1583	-0.30722
-60
-50	0.043777	0.007515	-0.01254	0.121322	0.127404	-0.02154	-0.01875	-0.02589				-0.03342	0.008163	0.034908	-0.03172			-0.06838	0.223164	0.03486	0.021207	0.091029	0.133677					-0.08856	0.04239	-0.04652	0.234216
-40	0.0475	0.009516	-0.0902	0.090408	0.103903	-0.01882	-0.03965	0.01544				-0.02566	-0.02141	-0.03309	-0.02619			-0.03924	0.236574	0.037341	0.02653	0.151673	-0.20981					-0.02734	0.03581	-0.14451	0.014498
-30	0.058589	0.004616	-0.0668	0.148095	0.060017	0.021391	-0.05257	-0.0556				-0.00959	0.003276	-0.08272	-0.031			-0.01488	0.227952	0.068229	0.020828	0.18325	-0.1344					-0.01	0.046834	-0.07347	-0.01522
-20	0.08715	0.026653	-0.01762	0.144539	0.099906	0.032943	0.021299	-0.01722				0.018199	0.010265	-0.04368	-0.0352			0.0557	0.274808	0.108841	0.043109	0.241917	-0.0269					0.087791	0.042513	-0.02346	0.079095
-10	0.110961	0.068169	0.095155	0.156393	0.134515	0.078664	0.108083	0.016906				0.054272	0.049457	-0.01872	-0.03248			0.128174	0.293186	0.110857	0.075907	0.279416	0.036174					0.226136	0.074387	0.063595	0.089924
0	0.171582	0.12296	0.23055	0.187153	0.169255	0.116166	0.218631	0.061767				0.085233	0.082364	-0.01914	-0.01834			0.22864	0.342924	0.187992	0.125297	0.285178	0.107859					0.34088	0.118922	0.183324	0.186178
10	0.265883	0.205732	0.382555	0.240062	0.191227	0.22547	0.314158	0.141439				0.154709	0.1308	0.025972	0.010502			0.324373	0.401115	0.241661	0.176578	0.331827	0.210282					0.427853	0.159503	0.308449	0.27109
20	0.385188	0.31134	0.536838	0.296569	0.243412	0.362415	0.406546	0.270609				0.195584	0.170574	0.061879	0.016964			0.385019	0.491763	0.306046	0.207048	0.350928	0.336504					0.491231	0.204672	0.408247	0.350963
30	0.508381	0.426824	0.615172	0.371914	0.286413	0.466542	0.513635	0.403267				0.235611	0.199779	0.063802	0.018498			0.453787	0.576725	0.43236	0.271717	0.427618	0.423053					0.553506	0.267028	0.554513	0.428662
40	0.621534	0.534676	0.709059	0.456734	0.337227	0.575237	0.595597	0.502816				0.257057	0.253518	0.116908	0.049337			0.513808	0.616493	0.557693	0.342911	0.473032	0.517145					0.627919	0.34064	0.704899	0.537172
50	0.715646	0.623137	0.76463	0.52521	0.438731	0.649351	0.695568	0.586857				0.307873	0.327851	0.162738	0.083059			0.590609	0.644401	0.645946	0.37017	0.452969	0.613986					0.678851	0.411462	0.784608	0.662261
60	0.799714	0.701803	0.875904	0.612232	0.506218	0.712088	0.748677	0.618352				0.362699	0.380331	0.25894	0.149561			0.650328	0.733229	0.733152	0.459061	0.531275	0.721336					0.749395	0.47512	0.83744	0.69277
70	0.883431	0.764512	0.866064	0.70352	0.634157	0.773555	0.819393	0.76509				0.440651	0.495999	0.375363	0.208373			0.706323	0.790886	0.780199	0.514379	0.564618	0.796615					0.801319	0.585119	0.93526	0.751339
80	0.931699	0.820001	0.9041	0.762194	0.708454	0.828505	0.860497	0.827604				0.549677	0.557577	0.474891	0.397872			0.752941	0.850985	0.845251	0.597945	0.634414	0.91984					0.835113	0.700027	0.962642	0.840833
90	0.993045	0.872255	0.909298	0.840198	0.848983	0.877685	0.919566	0.892401				0.641964	0.684354	0.597096	0.475185			0.783595	0.915202	0.87937	0.641756	0.76665	1.0143					0.88032	0.781622	0.978543	0.896498
100	0.993038	0.906415	0.834074	0.925445	0.945795	0.92949	0.975979	0.906831				0.760022	0.812609	0.73207	0.61987			0.870197	0.933856	0.952081	0.75366	0.832291	1.03765					0.945234	0.84793	1.01068	0.907453
110	1.03487	0.962944	0.957933	0.980787	0.957071	1.00324	0.982993	0.964734				0.867963	0.873331	0.840802	0.804717			1.00045	0.937018	0.970305	0.848328	0.960184	1.10068					0.973796	0.925173	1.01887	0.917173
120	1	1	1	1	1	1	1	1				1	1	1		1		1	1	1	1	1	1					1	1	1	1

## Sheet: Figure5
(Main Figure-5d)
PANX1-WT_1			PANX1-WT_2			PANX1-WT_3			PANX1-WT_normalized
ATP-gS(M)(X)	Fnorm [%](Y)		ATP-gS(M)(X)	Fnorm [%](Y)		ATP-gS(M)(X)	Fnorm [%](Y)		ATP-gS(M)(X)	Y1	Y2	Y3
0.002	808.732		0.002	805.029		0.002	895.226		0.002	0.868899	0.849459	0.979561
0.001	808.281		0.001	807.053		0.001	896.399		0.001	1	1	0.956477
0.0005	809.132		0.0005	805.751		0.0005	895.388		0.0005	0.915676	0.870242	1
0.00025	808.308		0.00025	805.275		0.000125	894.661		0.00025	0.884792	0.777085	0.957873
0.000125	804.512		0.000125	801.094		6.25e-05	893.323		0.000125	0.613965	0.605338	0.763709
6.25e-05	804.081		3.125e-05	799.214		3.125e-05	893.334		6.25e-05	0.49216	0.606794	0.741681
3.125e-05	802.733		1.5625e-05	800.412		1.5625e-05	893.189		3.125e-05	0.56977	0.588188	0.67269
1.5625e-05	798.455		7.8125e-06	797.854		7.8125e-06	891.656		1.5625e-05	0.403988	0.391452	0.453869
7.8125e-06	798.32		3.90625e-06	795.175		3.90625e-06	892.348		7.8125e-06	0.230436	0.480309	0.446982
1.95313e-06	793.148		1.95313e-06	795.343		1.95313e-06	889.952		1.95313e-06	0.241307	0.17286	0.182422
4.88281e-07	790.425		4.88281e-07	793.683		4.88281e-07	889.697		4.88281e-07	0.0233114	0.138952	0.0431853
2.44141e-07	790.295		6.10352e-08	791.618		2.44141e-07	891.06		2.44141e-07	0.13379	0.140158	0.0364951
6.10352e-08	789.581					6.10352e-08	888.605		6.10352e-08	0	0	0
PANX1-R217H_1			PANX1-R217H_2			PANX1-R217H-3			PANX1_R217H_normalized
ATP-gS(M)(X)	Fnorm [%](Y)		ATP-gS(M)(X)	Fnorm [%](Y)		ATP-gS(M)(X)	Fnorm [%](Y)		ATP-gS(M)(X)	Y1	Y2	Y3
0.002	821.647		0.002	804.118		0.002	809.295		0.002	1	1	1
0.001	819.816		0.001	798.958		0.001	807.505		0.001	0.802016	0.739192	0.84449
0.0005	819.812		0.0005	798.714		0.0005	806.466		0.0005	0.801534	0.726877	0.754263
0.00025	818.789		0.00025	794.048		0.00025	805.761		0.00025	0.690968	0.491018	0.693039
0.000125	816.78		0.000125	791.734		0.000125	802.262		0.000125	0.473712	0.374054	0.389195
6.25e-05	816.541		6.25e-05	790.597		6.25e-05	802.285		6.25e-05	0.447826	0.316589	0.391246
3.125e-05	813.608		3.125e-05	789.235		3.125e-05	799.569		3.125e-05	0.130689	0.247718	0.155346
1.5625e-05	813.167		1.5625e-05	788.062		1.5625e-05	799.095		1.5625e-05	0.0830033	0.188423	0.114211
7.8125e-06	815.092		7.8125e-06	788.474		7.8125e-06	801.221		7.8125e-06	0.291145	0.209287	0.298825
9.76563e-07	813.72		9.76563e-07	785.463		9.76563e-07	798.826		9.76563e-07	0.142774	0.0570767	0.0908151
4.88281e-07	814.442		4.88281e-07	786.901		4.88281e-07	800.02		4.88281e-07	0.2209	0.129758	0.194526
2.44141e-07	814.677		2.44141e-07	785.454		2.44141e-07	799.754		2.44141e-07	0.246271	0.056617	0.171395
1.2207e-07	813.704		1.2207e-07	785.84		1.2207e-07	799.082		1.2207e-07	0.141038	0.0761269	0.113029
6.10352e-08	813.816		6.10352e-08	786.832		6.10352e-08	799.903		6.10352e-08	0.153176	0.126278	0.184349

## Sheet: Figure6
PANX1_WT		PANX1_R217H		PANX3_WT			Main_Figure 6
X	Y	X	Y	X	Y
99.7779	92.753	99.898	94.754	34.9852	-94.7694
99.656	92.628	99.7765	94.629	34.8693	-94.6444
99.5341	92.503	99.6551	94.504	34.7534	-94.5194
99.4123	92.378	99.5336	94.379	34.6376	-94.3944
99.2904	92.253	99.4122	94.254	34.5219	-94.2694
99.1686	92.128	99.2907	94.129	34.4062	-94.1444
99.0467	92.003	99.1693	94.004	34.2906	-94.0194
98.9249	91.878	99.0479	93.879	34.1751	-93.8944
98.803	91.753	98.9265	93.754	34.0596	-93.7694
98.6812	91.628	98.8051	93.629	33.9442	-93.6444
98.5593	91.503	98.6837	93.504	33.8288	-93.5194
98.4375	91.378	98.5623	93.379	33.7135	-93.3944
98.3157	91.253	98.4409	93.254	33.5983	-93.2694
98.194	91.128	98.3196	93.129	33.4832	-93.1444
98.0722	91.003	98.1982	93.004	33.3681	-93.0194
97.9504	90.878	98.0769	92.879	33.2531	-92.8944
97.8286	90.753	97.9556	92.754	33.1381	-92.7694
97.7069	90.628	97.8342	92.629	33.0232	-92.6444
97.5851	90.503	97.7129	92.504	32.9084	-92.5194
97.4634	90.378	97.5916	92.379	32.7937	-92.3944
97.3416	90.253	97.4703	92.254	32.679	-92.2694
97.2199	90.128	97.349	92.129	32.5644	-92.1444
97.0981	90.003	97.2278	92.004	32.4499	-92.0194
96.9764	89.878	97.1065	91.879	32.3354	-91.8944
96.8547	89.753	96.9852	91.754	32.221	-91.7694
96.733	89.628	96.864	91.629	32.1067	-91.6444
96.6113	89.503	96.7427	91.504	31.9925	-91.5194
96.4896	89.378	96.6215	91.379	31.8783	-91.3944
96.368	89.253	96.5003	91.254	31.7642	-91.2694
96.2463	89.128	96.3791	91.129	31.6502	-91.1444
96.1247	89.003	96.2578	91.004	31.5363	-91.0194
96.003	88.878	96.1367	90.879	31.4226	-90.8944
95.8814	88.753	96.0155	90.754	31.3086	-90.7694
95.7598	88.628	95.8943	90.629	31.1949	-90.6444
95.6382	88.503	95.7731	90.504	31.0814	-90.5194
95.5166	88.378	95.652	90.3789	30.9679	-90.3944
95.395	88.253	95.5307	90.2539	30.8545	-90.2694
95.2734	88.128	95.4096	90.1289	30.7412	-90.1444
95.1518	88.003	95.2885	90.0039	30.6279	-90.0194
95.0302	87.878	95.1674	89.8789	30.5148	-89.8944
94.9087	87.753	95.0463	89.7539	30.4018	-89.7694
94.7871	87.628	94.9252	89.6289	30.2887	-89.6444
94.6656	87.503	94.8041	89.5039	30.1757	-89.5194
94.544	87.378	94.683	89.3789	30.0629	-89.3944
94.4225	87.253	94.5619	89.2539	29.9502	-89.2694
94.301	87.128	94.4409	89.1289	29.8377	-89.1444
94.1795	87.003	94.3199	89.0039	29.7251	-89.0194
94.0579	86.878	94.1988	88.8789	29.6127	-88.8944
93.9364	86.753	94.0778	88.7539	29.5004	-88.7694
93.815	86.628	93.9568	88.6289	29.3882	-88.6444
93.6934	86.503	93.8358	88.5039	29.2761	-88.5194
93.5719	86.378	93.7148	88.3789	29.164	-88.3944
93.4505	86.253	93.5938	88.2539	29.052	-88.2694
93.329	86.128	93.4728	88.1289	28.9402	-88.1444
93.2076	86.003	93.3519	88.0039	28.8284	-88.0194
93.0862	85.878	93.2309	87.8789	28.7167	-87.8944
92.9648	85.753	93.11	87.7539	28.6051	-87.7694
92.8434	85.628	92.9891	87.6289	28.4937	-87.6444
92.722	85.503	92.8681	87.5039	28.3823	-87.5194
92.6006	85.378	92.7472	87.3789	28.2714	-87.3944
92.4792	85.253	92.6264	87.2539	28.16	-87.2694
92.3578	85.128	92.5055	87.1289	28.049	-87.1444
92.2365	85.003	92.3846	87.0039	27.9382	-87.0194
92.1151	84.878	92.2637	86.8789	27.8274	-86.8944
91.9938	84.753	92.1429	86.7539	27.7168	-86.7694
91.8724	84.628	92.022	86.6289	27.6063	-86.6444
91.7511	-144.503	91.9012	-146.504	27.4959	-86.5194
91.6298	-144.378	91.7804	-146.379	27.3857	-86.3944
91.5085	-144.253	91.6596	-146.254	27.2755	-86.2694
91.3872	-144.128	91.5388	-146.129	27.1655	-86.1444
91.2659	-144.003	91.418	-146.004	27.0556	-86.0194
91.1446	-143.878	91.2972	-145.879	26.9458	-85.8944
91.0234	-143.753	91.1764	-145.754	26.8361	-85.7694
90.9021	-143.628	91.0557	-145.629	26.7265	-85.6444
90.7809	-143.503	90.9349	-145.504	26.6171	-85.5194
90.6596	-143.378	90.8142	-145.379	26.5077	-85.3944
90.5384	-143.253	90.6935	-145.254	26.3985	-85.2694
90.4172	-143.128	90.5727	-145.129	26.2894	-85.1444
90.296	-143.003	90.452	-145.004	26.1805	-85.0194
90.1748	-142.878	90.3314	-144.879	26.0718	-84.8944
90.0536	-142.753	90.2107	-144.754	25.9631	-84.7694
89.9324	-142.628	90.09	-144.629	25.8546	-84.6444
89.8113	-142.503	89.9693	-144.504	25.7463	-84.5194
89.6901	-142.378	89.8487	-144.379	25.6381	-84.3944
89.569	-142.253	89.7281	-144.254	25.53	-84.2694
89.4478	-142.128	89.6075	-144.129	25.4221	-84.1444
89.3267	-142.003	89.4869	-144.004	25.3143	-84.0194
89.2056	-141.878	89.3663	-143.879	25.2066	-83.8944
89.0845	-141.753	89.2457	-143.754	25.0991	-83.7694
88.9634	-141.628	89.1251	-143.629	24.9917	-83.6444
88.8423	-141.503	89.0045	-143.504	24.8846	-83.5194
88.7213	-141.378	88.884	-143.379	24.7776	-83.3944
88.6002	-141.253	88.7635	-143.254	24.6707	-83.2694
88.4792	-141.128	88.6429	-143.129	24.5639	-83.1444
88.3581	-141.003	88.5224	-143.004	24.4571	-83.0194
88.2371	-140.878	88.4019	-142.879	24.3508	-82.8944
88.1161	-140.753	88.2814	-142.754	24.2446	-82.7694
87.9951	-140.628	88.1609	-142.629	24.1386	-82.6444
87.874	-140.503	88.0404	-142.504	24.0328	-82.5194
87.753	-140.378	87.92	-142.379	23.9272	-82.3944
87.632	-140.253	87.7995	-142.254	23.8217	-82.2694
87.511	-140.128	87.6791	-142.129	23.7163	-82.1444
87.3901	-140.003	87.5587	-142.004	23.6112	-82.0194
87.2692	-139.878	87.4383	-141.879	23.5063	-81.8944
87.1482	-139.753	87.3179	-141.754	23.4015	-81.7694
87.0273	-139.628	87.1975	-141.629	23.2969	-81.6444
86.9064	-139.503	87.0772	-141.504	23.1926	-81.5194
86.7855	-139.378	86.9568	-141.379	23.0884	-81.3944
86.6646	-139.253	86.8365	-141.254	22.9844	-81.2694
86.5437	-139.128	86.7161	-141.129	22.8805	-81.1444
86.4229	-139.003	86.5958	-141.004	22.7769	-81.0194
86.302	-138.878	86.4755	-140.879	22.6734	-80.8944
86.1812	-138.753	86.3552	-140.754	22.5702	-80.7694
86.0604	-138.628	86.235	-140.629	22.4671	-80.6444
85.9395	-138.503	86.1147	-140.504	22.3641	-80.5194
85.8187	-138.378	85.9945	-140.379	22.2615	-80.3944
85.698	-138.253	85.8742	-140.254	22.1591	-80.2694
85.5772	-138.128	85.754	-140.129	22.0569	-80.1444
85.4564	-138.003	85.6338	-140.004	21.9549	-80.0194
85.3357	-137.878	85.5136	-139.879	21.8532	-79.8944
85.2149	-137.753	85.3934	-139.754	21.7516	-79.7694
85.0942	-137.628	85.2732	-139.629	21.6503	-79.6444
84.9734	-137.503	85.1531	-139.504	21.5493	-79.5194
84.8527	-137.378	85.033	-139.379	21.4484	-79.3944
84.732	-137.253	84.9128	-139.254	21.3478	-79.2694
84.6114	-137.128	84.7927	-139.129	21.2475	-79.1444
84.4907	-137.003	84.6726	-139.004	21.1473	-79.0194
84.37	-136.878	84.5526	-138.879	21.0476	-78.8944
84.2494	-136.753	84.4325	-138.754	20.9475	-78.7694
84.1287	-136.628	84.3124	-138.629	20.8482	-78.6444
84.0081	-136.503	84.1924	-138.504	20.7492	-78.5194
83.8875	-136.378	84.0724	-138.379	20.6504	-78.3944
83.7669	-136.253	83.9524	-138.254	20.5519	-78.2694
83.6463	-136.128	83.8324	-138.129	20.4536	-78.1444
83.5257	-136.003	83.7124	-138.004	20.3555	-78.0194
83.4051	-135.878	83.5924	-137.879	20.2578	-77.8944
83.2846	-135.753	83.4725	-137.754	20.1602	-77.7694
83.1641	-135.628	83.3526	-137.629	20.063	-77.6444
83.0436	-135.503	83.2326	-137.504	19.9662	-77.5194
82.9231	-135.378	83.1127	-137.379	19.8696	-77.3944
82.8026	-135.253	82.9927	-137.254	19.7733	-77.2694
82.6821	-135.128	82.8728	-137.129	19.6772	-77.1444
82.5616	-135.003	82.753	-137.004	19.5813	-77.0194
82.4412	-134.878	82.6331	-136.879	19.486	-76.8944
82.3207	-134.753	82.5133	-136.754	19.3909	-76.7694
82.2003	-134.628	82.3935	-136.629	19.2961	-76.6444
82.0799	-134.503	82.2737	-136.504	19.2016	-76.5194
81.9595	-134.378	82.1539	-136.379	19.1075	-76.3944
81.8391	-134.253	82.0341	-136.254	19.0137	-76.2694
81.7187	-134.128	81.9144	-136.129	18.9202	-76.1444
81.5984	-134.003	81.7946	-136.004	18.8269	-76.0194
81.478	-133.878	81.6749	-135.879	18.734	-75.8944
81.3577	-133.753	81.5552	-135.754	18.6415	-75.7694
81.2374	-133.628	81.4355	-135.629	18.5494	-75.6444
81.1171	-133.503	81.3158	-135.504	18.4576	-75.5194
80.9968	-133.378	81.1962	-135.379	18.3661	-75.3944
80.8765	-133.253	81.0765	-135.254	18.275	-75.2694
80.7562	-133.128	80.9569	-135.129	18.1842	-75.1444
80.636	-133.003	80.8372	-135.004	18.0938	-75.0194
80.5158	-132.878	80.7177	-134.879	18.004	-74.8944
80.3955	-132.753	80.5981	-134.754	17.9143	-74.7694
80.2753	-132.628	80.4785	-134.629	17.8251	-74.6444
80.1551	-132.503	80.3589	-134.504	17.7364	-74.5194
80.035	-132.378	80.2394	-134.379	17.6481	-74.3944
79.9148	-132.253	80.1199	-134.254	17.5602	-74.2694
79.7946	-132.128	80.0004	-134.129	17.4727	-74.1444
79.6745	-132.003	79.8809	-134.004	17.3856	-74.0194
79.5544	-131.878	79.7614	-133.879	17.299	-73.8944
79.4343	-131.753	79.642	-133.754	17.2127	-73.7694
79.3142	-131.628	79.5225	-133.629	17.1268	-73.6444
79.1941	-131.503	79.4031	-133.504	17.0414	-73.5194
79.074	-131.378	79.2837	-133.379	16.9563	-73.3944
78.954	-131.253	79.1643	-133.254	16.8717	-73.2694
78.8339	-131.128	79.0449	-133.129	16.7879	-73.1444
78.7139	-131.003	78.9256	-133.004	16.7038	-73.0194
78.5939	-130.878	78.8062	-132.879	16.6207	-72.8944
78.4739	-130.753	78.6869	-132.754	16.5381	-72.7694
78.3539	-130.628	78.5676	-132.629	16.456	-72.6444
78.234	-130.503	78.4483	-132.504	16.3745	-72.5194
78.114	-130.378	78.329	-132.379	16.2934	-72.3944
77.9941	-130.253	78.2098	-132.254	16.2129	-72.2694
77.8742	-130.128	78.0905	-132.129	16.1328	-72.1444
77.7543	-130.003	77.9713	-132.004	16.0533	-72.0194
77.6344	-129.878	77.8521	-131.879	15.9743	-71.8944
77.5146	-129.753	77.7329	-131.754	15.8957	-71.7694
77.3947	-129.628	77.6138	-131.629	15.8178	-71.6444
77.2749	-129.503	77.4946	-131.504	15.7403	-71.5194
77.1551	-129.378	77.3754	-131.379	15.6633	-71.3944
77.0353	-129.253	77.2562	-131.254	15.5869	-71.2694
76.9155	-129.128	77.1371	-131.129	15.5112	-71.1443
76.7957	-129.003	77.0181	-131.004	15.4355	-71.0193
76.676	-128.878	76.899	-130.879	15.361	-70.8943
76.5562	-128.753	76.78	-130.754	15.2871	-70.7693
76.4365	-128.628	76.661	-130.629	15.2138	-70.6443
76.3168	-128.503	76.542	-130.504	15.1411	-70.5193
76.1971	-128.378	76.423	-130.379	15.0687	-70.3943
76.0774	-128.253	76.304	-130.254	14.9969	-70.2693
75.9578	-128.128	76.1851	-130.129	14.9261	-70.1443
75.8382	-128.003	76.0661	-130.004	14.8559	-70.0193
75.7185	-127.878	75.9472	-129.879	14.7864	-69.8943
75.599	-127.753	75.8283	-129.754	14.7147	-69.7693
75.4794	-127.628	75.7095	-129.629	14.6424	-69.6443
75.3598	-127.503	75.5906	-129.504	14.5707	-69.5193
75.2403	-127.378	75.4718	-129.379	14.4993	-69.3943
75.1208	-127.253	75.353	-129.254	14.4285	-69.2693
75.0012	-127.128	75.2342	-129.129	14.3584	-69.1443
74.8817	-127.003	75.1154	-129.004	14.2889	-69.0193
74.7623	-126.878	74.9967	-128.879	14.2201	-68.8943
74.6428	-126.753	74.878	-128.754	14.1519	-68.7693
74.5234	-126.628	74.7592	-128.629	14.0845	-68.6443
74.404	-126.503	74.6406	-128.504	14.0177	-68.5193
74.2846	-126.378	74.5219	-128.379	13.9516	-68.3943
74.1652	-126.253	74.4033	-128.254	13.8862	-68.2693
74.0458	-126.128	74.2846	-128.129	13.8215	-68.1443
73.9264	-126.003	74.166	-128.004	13.7575	-68.0193
73.8071	-125.878	74.0474	-127.879	13.6943	-67.8943
73.6878	-125.753	73.9289	-127.754	13.6318	-67.7693
73.5685	-125.628	73.8103	-127.629	13.57	-67.6443
73.4492	-125.503	73.6918	-127.504	13.5091	-67.5193
73.3299	-125.378	73.5733	-127.379	13.4494	-67.3943
73.2107	-125.253	73.4548	-127.254	13.3897	-67.2693
73.0915	-125.128	73.3364	-127.129	13.3312	-67.1443
72.9722	-125.003	73.2179	-127.004	13.2736	-67.0193
72.853	-124.878	73.0995	-126.879	13.2168	-66.8943
72.7339	-124.753	72.9811	-126.754	13.1607	-66.7693
72.6147	-124.628	72.8628	-126.629	13.1056	-66.6443
72.4956	-124.503	72.744	-126.504	13.0513	-66.5193
72.3765	-124.378	72.6257	-126.379	12.9978	-66.3943
72.2574	-124.253	72.5074	-126.254	12.9453	-66.2693
72.1383	-124.128	72.3873	-126.129	12.8935	-66.1443
72.0193	-124.003	72.2672	-126.004	12.8427	-66.0193
71.9003	-123.878	72.1463	-125.879	12.7926	-65.8943
71.7813	-123.753	72.0254	-125.754	12.7431	-65.7693
71.6623	-123.628	71.9045	-125.629	12.6949	-65.6443
71.5433	-123.503	71.7837	-125.504	12.6477	-65.5193
71.4244	-123.378	71.6628	-125.379	12.6013	-65.3943
71.3054	-123.253	71.542	-125.254	12.5559	-65.2693
71.1865	-123.128	71.4212	-125.129	12.5113	-65.1443
71.0676	-123.003	71.3004	-125.004	12.4677	-65.0193
70.9488	-122.878	71.1796	-124.879	12.4254	-64.8943
70.8299	-122.753	71.0588	-124.754	12.3834	-64.7693
70.7111	-122.628	70.9381	-124.629	12.3429	-64.6443
70.5923	-122.503	70.8173	-124.504	12.3034	-64.5193
70.4735	-122.378	70.6966	-124.379	12.2648	-64.3943
70.3547	-122.253	70.5759	-124.254	12.2272	-64.2693
70.2359	-122.128	70.4552	-124.129	12.1907	-64.1443
70.1172	-122.003	70.3345	-124.004	12.1552	-64.0193
69.9985	-121.878	70.2138	-123.879	12.1207	-63.8943
69.8798	-121.753	70.0931	-123.754	12.0872	-63.7693
69.7611	-121.628	69.9725	-123.629	12.0547	-63.6443
69.6425	-121.503	69.8519	-123.504	12.0231	-63.5193
69.5239	-121.378	69.7313	-123.379	11.9928	-63.3943
69.4053	-121.253	69.6107	-123.254	11.9633	-63.2693
69.2867	-121.128	69.4901	-123.129	11.9349	-63.1443
69.1682	-121.003	69.3695	-123.004	11.9076	-63.0193
69.0496	-120.878	69.249	-122.879	11.8811	-62.8943
68.9311	-120.753	69.1284	-122.754	11.8557	-62.7692
68.8127	-120.628	69.0079	-122.629	11.8288	-62.6442
68.6942	-120.503	68.8874	-122.504	11.7979	-62.5192
68.5757	-120.378	68.7669	-122.379	11.7553	-62.3942
68.4573	-120.253	68.6464	-122.254	11.7138	-62.2692
68.3389	-120.128	68.526	-122.129	11.673	-62.1442
68.2206	-120.003	68.4055	-122.004	11.6332	-62.0192
68.1022	-119.878	68.2851	-121.879	11.5948	-61.8942
67.9839	-119.753	68.1647	-121.754	11.5575	-61.7692
67.8656	-119.628	68.0443	-121.629	11.5211	-61.6442
67.7473	-119.503	67.9239	-121.504	11.4859	-61.5192
67.6291	-119.378	67.8036	-121.379	11.4518	-61.3942
67.5108	-119.253	67.6832	-121.254	11.4189	-61.2692
67.3926	-119.128	67.5629	-121.129	11.3865	-61.1442
67.2745	-119.003	67.4426	-121.004	11.3552	-61.0191
67.1563	-118.878	67.3223	-120.879	11.3256	-60.8941
67.0382	-118.753	67.202	-120.754	11.2971	-60.7691
66.9201	-118.628	67.0818	-120.629	11.2698	-60.6441
66.802	-118.503	66.9615	-120.504	11.2437	-60.5191
66.6839	-118.378	66.8413	-120.379	11.2187	-60.3941
66.5659	-118.253	66.7211	-120.254	11.195	-60.2691
66.4479	-118.128	66.6009	-120.129	11.1723	-60.1441
66.3299	-118.003	66.4807	-120.004	11.1509	-60.0191
66.2119	-117.878	66.3606	-119.879	11.1306	-59.8941
66.094	-117.753	66.2404	-119.754	11.1111	-59.7691
65.9761	-117.628	66.1203	-119.629	11.0926	-59.6441
65.8582	-117.503	66.0002	-119.504	11.0745	-59.5191
65.7403	-117.378	65.8801	-119.379	11.0586	-59.3941
65.6225	-117.253	65.76	-119.254	11.044	-59.2691
65.5047	-117.128	65.64	-119.129	11.0318	-59.1441
65.3869	-117.003	65.52	-119.004	11.0184	-59.0191
65.2691	-116.878	65.3999	-118.879	11.0077	-58.8941
65.1514	-116.753	65.2799	-118.754	10.9982	-58.7691
65.0337	-116.628	65.1599	-118.629	10.9865	-58.644
64.916	-116.503	65.0399	-118.504	10.9425	-58.519
64.7984	-116.378	64.92	-118.379	10.8952	-58.394
64.6808	-116.253	64.8	-118.254	10.8489	-58.269
64.5631	-116.128	64.6801	-118.129	10.8036	-58.144
64.4456	-116.003	64.5603	-118.004	10.7595	-58.019
64.328	-115.878	64.4404	-117.879	10.7165	-57.894
64.2105	-115.753	64.3205	-117.754	10.6744	-57.769
64.093	-115.628	64.2007	-117.629	10.6335	-57.644
63.9756	-115.503	64.0809	-117.504	10.5938	-57.519
63.8582	-115.378	63.9611	-117.379	10.5553	-57.394
63.7407	-115.253	63.8414	-117.254	10.5175	-57.269
63.6234	-115.128	63.7216	-117.129	10.4814	-57.144
63.506	-115.003	63.6019	-117.004	10.4464	-57.019
63.3887	-114.878	63.4822	-116.879	10.4124	-56.894
63.2714	-114.753	63.3625	-116.754	10.3788	-56.7689
63.1542	-114.628	63.2428	-116.629	10.3473	-56.6439
63.037	-114.503	63.1232	-116.504	10.317	-56.5189
62.9198	-114.378	63.0035	-116.379	10.2776	-56.3938
62.8026	-114.253	62.8839	-116.254	10.2184	-56.2686
62.6855	-114.128	62.7643	-116.129	10.1575	-56.1436
62.5683	-114.003	62.6448	-116.004	10.0976	-56.0186
62.4513	-113.878	62.5252	-115.879	10.0387	-55.8936
62.3342	-113.753	62.4057	-115.754	9.98075	-55.7686
62.2172	-113.628	62.2862	-115.629	9.92421	-55.6436
62.1002	-113.503	62.1667	-115.504	9.86812	-55.5186
61.9832	-113.378	62.0472	-115.379	9.81344	-55.3936
61.8663	-113.253	61.9278	-115.254	9.75985	-55.2686
61.7494	-113.128	61.8084	-115.129	9.70653	-55.1436
61.6325	-113.003	61.689	-115.004	9.65431	-55.0186
61.5157	-112.878	61.5696	-114.879	9.60277	-54.8936
61.3989	-112.753	61.4502	-114.754	9.50996	-54.7686
61.2821	-112.628	61.3309	-114.629	9.41747	-54.6436
61.1653	-112.503	61.2116	-114.504	9.32526	-54.5186
61.0486	-112.378	61.0923	-114.379	9.23408	-54.3936
60.932	-112.253	60.973	-114.254	9.14356	-54.2686
60.8153	-112.128	60.8538	-114.129	9.05372	-54.1436
60.6987	-112.003	60.7345	-114.004	8.96458	-54.0186
60.5821	-111.878	60.6153	-113.879	8.87616	-53.8936
60.4655	-111.753	60.4962	-113.754	8.78847	-53.7686
60.349	-111.628	60.377	-113.629	8.70153	-53.6436
60.2325	-111.503	60.2579	-113.504	8.61537	-53.5186
60.116	-111.378	60.1388	-113.379	8.52997	-53.3936
59.9996	-111.253	60.0197	-113.254	8.44538	-53.2686
59.8832	-111.128	59.9006	-113.129	8.36164	-53.1436
59.7669	-111.003	59.7816	-113.004	8.27876	-53.0186
59.6505	-110.878	59.6626	-112.879	8.19674	-52.8936
59.5342	-110.753	59.5436	-112.754	8.11562	-52.7686
59.418	-110.628	59.4246	-112.629	8.03541	-52.6436
59.3018	-110.503	59.3057	-112.504	7.95614	-52.5186
59.1856	-110.378	59.1868	-112.379	7.87777	-52.3936
59.0694	-110.253	59.0678	-112.254	7.80035	-52.2686
58.9533	-110.128	58.949	-112.129	7.72394	-52.1436
58.8371	-110.003	58.8301	-112.004	7.64856	-52.0186
58.721	-109.878	58.7113	-111.879	7.57424	-51.8936
58.605	-109.753	58.5925	-111.754	7.50099	-51.7686
58.4891	-109.628	58.4737	-111.629	7.42886	-51.6436
58.3732	-109.503	58.355	-111.504	7.35785	-51.5186
58.2572	-109.378	58.2362	-111.379	7.28836	-51.3936
58.1414	-109.253	58.1176	-111.254	7.21949	-51.2686
58.0256	-109.128	57.9989	-111.129	7.15213	-51.1436
57.9098	-109.003	57.8802	-111.004	7.086	-51.0186
57.794	-108.878	57.7616	-110.879	7.02114	-50.8936
57.6783	-108.753	57.643	-110.754	6.95758	-50.7686
57.5627	-108.628	57.5245	-110.629	6.89534	-50.6436
57.447	-108.503	57.4059	-110.504	6.83446	-50.5186
57.3314	-108.378	57.2874	-110.379	6.77495	-50.3936
57.2159	-108.253	57.169	-110.254	6.71677	-50.2686
57.1004	-108.128	57.0505	-110.129	6.66003	-50.1436
56.9849	-108.003	56.9321	-110.004	6.60476	-50.0186
56.8695	-107.878	56.8137	-109.879	6.55098	-49.8936
56.754	-107.753	56.6953	-109.754	6.49873	-49.7686
56.6387	-107.628	56.577	-109.629	6.44804	-49.6436
56.5234	-107.503	56.4586	-109.504	6.39892	-49.5186
56.4081	-107.378	56.3404	-109.379	6.35142	-49.3936
56.2928	-107.253	56.2221	-109.254	6.30556	-49.2686
56.1776	-107.128	56.1039	-109.129	6.26169	-49.1436
56.0624	-107.003	55.9857	-109.004	6.21867	-49.0186
55.9474	-106.878	55.8675	-108.879	6.17796	-48.8936
55.8321	-106.753	55.7493	-108.754	6.13901	-48.7686
55.7171	-106.628	55.6312	-108.629	6.10184	-48.6436
55.6021	-106.503	55.5131	-108.504	6.06648	-48.5186
55.4871	-106.378	55.3951	-108.379	6.03336	-48.3936
55.3722	-106.253	55.2771	-108.254	6.00121	-48.2686
55.2573	-106.128	55.159	-108.129	5.9714	-48.1436
55.1425	-106.003	55.041	-108.004	5.94348	-48.0186
55.0277	-105.878	54.9231	-107.879	5.91482	-47.8935
54.9127	-105.753	54.8052	-107.754	5.87667	-47.7684
54.7981	-105.628	54.6873	-107.629	5.81655	-47.6434
54.6832	-105.503	54.5694	-107.504	5.75801	-47.5184
54.5686	-105.378	54.4515	-107.379	5.70108	-47.3934
54.4539	-105.253	54.3338	-107.254	5.64575	-47.2684
54.3395	-105.128	54.216	-107.129	5.59212	-47.1434
54.2246	-105.003	54.0983	-107.004	5.54017	-47.0184
54.1103	-104.878	53.9804	-106.879	5.48996	-46.8934
53.9958	-104.753	53.8625	-106.754	5.44119	-46.7683
53.8814	-104.628	53.7449	-106.629	5.39473	-46.6433
53.7671	-104.503	53.6273	-106.504	5.35013	-46.5183
53.6529	-104.378	53.5097	-106.379	5.30744	-46.3933
53.5387	-104.253	53.3922	-106.254	5.26658	-46.2683
53.4245	-104.128	53.2743	-106.129	5.22825	-46.1433
53.3104	-104.003	53.1565	-106.003	5.19094	-46.0183
53.1898	-103.878	53.0382	-105.878	5.15617	-45.8933
53.0685	-103.753	52.9195	-105.753	5.12347	-45.7683
52.9467	-103.628	52.7989	-105.628	5.09286	-45.6433
52.8248	-103.503	52.6781	-105.503	5.06438	-45.5183
52.703	-103.378	52.5568	-105.378	5.03805	-45.3933
52.5811	-103.253	52.4356	-105.253	5.01389	-45.2683
52.4593	-103.128	52.3143	-105.128	4.99194	-45.1433
52.3375	-103.003	52.193	-105.003	4.9722	-45.0183
52.2157	-102.878	52.0718	-104.878	4.9547	-44.8933
52.094	-102.753	51.9506	-104.753	4.93946	-44.7683
51.9722	-102.628	51.8294	-104.628	4.92649	-44.6433
51.8505	-102.503	51.7082	-104.503	4.91581	-44.5183
51.7288	-102.378	51.5871	-104.378	4.90742	-44.3933
51.6071	-102.253	51.4659	-104.253	4.90134	-44.2683
51.4854	-102.128	51.3447	-104.128	4.89752	-44.1433
51.3637	-102.003	51.2236	-104.003	4.89599	-44.0183
51.242	-101.878	51.1025	-103.878	4.89677	-43.8933
51.1204	-101.753	50.9815	-103.753	4.89987	-43.7683
50.9988	-101.628	50.8604	-103.628	4.9048	-43.6433
50.8771	-101.503	50.7394	-103.503	4.91203	-43.5183
50.7555	-101.378	50.6184	-103.378	4.92188	-43.3933
50.6339	-101.253	50.4974	-103.253	4.93324	-43.2683
50.5123	-101.128	50.3764	-103.128	4.9479	-43.1433
50.3908	-101.003	50.2555	-103.003	4.96481	-43.0183
50.2693	-100.878	50.1345	-102.878	4.98373	-42.8933
50.1477	-100.753	50.0136	-102.753	5.00488	-42.7683
50.0262	-100.628	49.8927	-102.628	5.0275	-42.6433
49.9048	-100.503	49.7718	-102.503	5.05211	-42.5183
49.7833	-100.378	49.651	-102.378	5.08021	-42.3932
49.6619	-100.253	49.5301	-102.253	5.10791	-42.2682
49.5404	-100.128	49.4093	-102.128	5.14003	-42.1432
49.419	-100.003	49.2885	-102.003	5.17415	-42.0182
49.2976	-99.8775	49.1677	-101.878	5.20986	-41.8931
49.1762	-99.7525	49.047	-101.753	5.24691	-41.7681
49.0549	-99.6275	48.9261	-101.628	5.28604	-41.6431
48.9335	-99.5025	48.8054	-101.503	5.32712	-41.5181
48.8122	-99.3775	48.6847	-101.378	5.37094	-41.3931
48.6909	-99.2525	48.564	-101.253	5.41627	-41.268
48.5696	-99.1275	48.4433	-101.128	5.4631	-41.143
48.4483	-99.0025	48.3227	-101.003	5.51176	-41.018
48.3271	-98.8775	48.2021	-100.878	5.56235	-40.893
48.2058	-98.7525	48.0815	-100.753	5.61469	-40.768
48.0846	-98.6275	47.9609	-100.628	5.66962	-40.643
47.9634	-98.5025	47.8404	-100.503	5.72621	-40.518
47.8422	-98.3775	47.7199	-100.378	5.78354	-40.393
47.7211	-98.2525	47.5994	-100.253	5.84196	-40.268
47.5999	-98.1275	47.4789	-100.128	5.90229	-40.143
47.4788	-98.0025	47.3584	-100.003	5.964	-40.018
47.3577	-97.8775	47.238	-99.8777	6.02863	-39.893
47.2366	-97.7525	47.1176	-99.7527	6.09415	-39.7679
47.1156	-97.6275	46.9972	-99.6277	6.16078	-39.6429
46.9945	-97.5025	46.8768	-99.5027	6.22841	-39.5179
46.8735	-97.3775	46.7565	-99.3777	6.29793	-39.3929
46.7525	-97.2525	46.6362	-99.2527	6.36867	-39.2679
46.6315	-97.1275	46.5159	-99.1277	6.44035	-39.1429
46.5106	-97.0025	46.3956	-99.0027	6.51319	-39.0179
46.3896	-96.8775	46.2753	-98.8777	6.58759	-38.8929
46.2687	-96.7525	46.1551	-98.7527	6.66271	-38.7678
46.1478	-96.6275	46.0349	-98.6277	6.73918	-38.6428
46.0269	-96.5025	45.9147	-98.5027	6.81677	-38.5177
45.906	-96.3775	45.7946	-98.3777	6.89629	-38.3927
45.7852	-96.2525	45.6745	-98.2527	6.97687	-38.2677
45.6644	-96.1275	45.5544	-98.1277	7.05826	-38.1427
45.5436	-96.0025	45.4343	-98.0027	7.13985	-38.0177
45.4228	-95.8775	45.3142	-97.8777	7.22293	-37.8927
45.3021	-95.7525	45.1942	-97.7527	7.30695	-37.7677
45.1813	-95.6275	45.0742	-97.6277	7.39135	-37.6427
45.0605	-95.5025	44.9542	-97.5027	7.47666	-37.5177
44.9399	-95.3775	44.8343	-97.3777	7.56387	-37.3927
44.8192	-95.2525	44.7143	-97.2527	7.65192	-37.2677
44.6986	-95.1275	44.5945	-97.1277	7.73982	-37.1427
44.578	-95.0025	44.4746	-97.0027	7.82854	-37.0176
44.4574	-94.8775	44.3548	-96.8777	7.91892	-36.8926
44.3368	-94.7525	44.2349	-96.7527	8.00901	-36.7675
44.2163	-94.6275	44.1152	-96.6277	8.10077	-36.6425
44.0957	-94.5025	43.9954	-96.5027	8.19324	-36.5175
43.9752	-94.3775	43.8757	-96.3777	8.28656	-36.3925
43.8548	-94.2525	43.756	-96.2527	8.37968	-36.2675
43.7343	-94.1275	43.6363	-96.1277	8.47427	-36.1425
43.6139	-94.0025	43.5167	-96.0027	8.56898	-36.0175
43.4935	-93.8775	43.3971	-95.8777	8.66483	-35.8925
43.3731	-93.7525	43.2775	-95.7527	8.76101	-35.7675
43.2528	-93.6275	43.1579	-95.6277	8.8577	-35.6424
43.1325	-93.5025	43.0384	-95.5027	8.9547	-35.5174
43.0122	-93.3775	42.9189	-95.3777	9.05308	-35.3924
42.8919	-93.2525	42.7995	-95.2527	9.15125	-35.2674
42.7716	-93.1275	42.68	-95.1277	9.25024	-35.1424
42.6514	-93.0025	42.5606	-95.0027	9.34902	-35.0174
42.5312	-92.8775	42.4413	-94.8777	9.44934	-34.8924
42.4111	-92.7525	42.3219	-94.7527	9.55007	-34.7674
42.2909	-92.6275	42.2026	-94.6277	9.65092	-34.6424
42.1708	-92.5025	42.0833	-94.5027	9.75224	-34.5174
42.0507	-92.3775	41.9641	-94.3777	9.85383	-34.3923
41.9307	-92.2525	41.8449	-94.2527	9.95581	-34.2673
41.8107	-92.1275	41.7256	-94.1277	10.0453	-34.1369
41.6906	-92.0025	41.6064	-94.0027	10.0682	-34.0065
41.5707	-91.8775	41.4873	-93.8777	10.0207	-33.8815
41.4507	-91.7525	41.3682	-93.7527	9.9742	-33.7565
41.3308	-91.6275	41.2492	-93.6277	9.92857	-33.6315
41.2109	-91.5025	41.1302	-93.5027	9.88372	-33.5065
41.0911	-91.3775	41.0112	-93.3777	9.84091	-33.3815
40.9712	-91.2525	40.8922	-93.2527	9.79931	-33.2565
40.8514	-91.1275	40.7733	-93.1277	9.75862	-33.1315
40.7317	-91.0025	40.6545	-93.0027	9.71893	-33.0065
40.6119	-90.8775	40.5356	-92.8777	9.68088	-32.8815
40.4922	-90.7525	40.4168	-92.7527	9.64409	-32.7565
40.3725	-90.6275	40.2981	-92.6277	9.60846	-32.6315
40.2529	-90.5025	40.1793	-92.5027	9.57356	-32.5065
40.1332	-90.3775	40.0606	-92.3777	9.54074	-32.3815
40.0136	-90.2525	39.9419	-92.2527	9.50922	-32.2565
39.8941	-90.1275	39.8233	-92.1277	9.4785	-32.1315
39.7746	-90.0025	39.7047	-92.0027	9.44911	-32.0064
39.6551	-89.8775	39.5862	-91.8777	9.42156	-31.8814
39.5356	-89.7525	39.4677	-91.7527	9.39537	-31.7564
39.4162	-89.6275	39.3492	-91.6277	9.37052	-31.6314
39.2968	-89.5025	39.2308	-91.5027	9.34682	-31.5064
39.1774	-89.3775	39.1124	-91.3777	9.32431	-31.3814
39.0581	-89.2525	38.994	-91.2527	9.30317	-31.2564
38.9388	-89.1275	38.8757	-91.1277	9.28382	-31.1314
38.8195	-89.0025	38.7574	-91.0027	9.26482	-31.0064
38.7003	-88.8775	38.6392	-90.8777	9.24829	-30.8814
38.5811	-88.7525	38.521	-90.7527	9.23316	-30.7564
38.462	-88.6275	38.4028	-90.6277	9.21936	-30.6314
38.3428	-88.5025	38.2847	-90.5027	9.20666	-30.5064
38.2238	-88.3775	38.1666	-90.3777	9.19538	-30.3814
38.1047	-88.2525	38.0485	-90.2527	9.18554	-30.2564
37.9857	-88.1275	37.9305	-90.1277	9.17705	-30.1314
37.8667	-88.0025	37.8126	-90.0027	9.16872	-30.0064
37.7478	-87.8775	37.6947	-89.8777	9.16345	-29.8814
37.6289	-87.7525	37.5769	-89.7527	9.1595	-29.7564
37.5101	-87.6275	37.459	-89.6277	9.15724	-29.6314
37.3912	-87.5025	37.3413	-89.5027	9.15642	-29.5063
37.2724	-87.3775	37.2236	-89.3777	9.15708	-29.3813
37.1536	-87.2525	37.1059	-89.2527	9.15889	-29.2563
37.035	-87.1275	36.9883	-89.1277	9.15046	-29.1312
36.9163	-87.0025	36.8707	-89.0027	9.14349	-29.0061
36.7977	-86.8775	36.7531	-88.8777	9.13241	-28.8811
36.6791	-86.7525	36.6356	-88.7527	9.12277	-28.756
36.5605	-86.6275	36.5182	-88.6277	9.11482	-28.631
36.4421	-86.5025	36.4008	-88.5027	9.10832	-28.506
36.3236	-86.3775	36.2835	-88.3777	9.10234	-28.381
36.2052	-86.2525	36.1662	-88.2527	9.09781	-28.256
36.0868	-86.1275	36.0489	-88.1277	9.09566	-28.131
35.9685	-86.0025	35.9317	-88.0027	9.09496	-28.006
35.8502	-85.8775	35.8146	-87.8777	9.09463	-27.881
35.7319	-85.7525	35.6975	-87.7527	9.09575	-27.756
35.6137	-85.6275	35.5804	-87.6277	9.09941	-27.631
35.4956	-85.5025	35.4634	-87.5027	9.10453	-27.506
35.3775	-85.3775	35.3465	-87.3777	9.1107	-27.3809
35.2594	-85.2525	35.2296	-87.2527	9.11831	-27.2559
35.1414	-85.1275	35.1128	-87.1277	9.12777	-27.1309
35.0234	-85.0025	34.996	-87.0027	9.13835	-27.0059
34.9055	-84.8775	34.8792	-86.8777	9.15061	-26.8809
34.7876	-84.7525	34.7625	-86.7527	9.16398	-26.7559
34.6696	-84.6275	34.6459	-86.6277	9.17844	-26.6309
34.5518	-84.5025	34.5293	-86.5027	9.19382	-26.5059
34.434	-84.3775	34.4128	-86.3777	9.2117	-26.3808
34.3163	-84.2525	34.2963	-86.2527	9.23043	-26.2557
34.1987	-84.1275	34.1799	-86.1277	9.25112	-26.1307
34.0811	-84.0025	34.0636	-86.0027	9.2732	-26.0056
33.9635	-83.8775	33.9473	-85.8777	9.2968	-25.8806
33.846	-83.7525	33.831	-85.7527	9.32179	-25.7556
33.7285	-83.6275	33.715	-85.6277	9.34753	-25.6306
33.6111	-83.5025	33.5987	-85.5027	9.37457	-25.5056
33.4938	-83.3775	33.4827	-85.3777	9.39406	-25.3806
33.3765	-83.2525	33.3667	-85.2527	9.39832	-25.2555
33.2593	-83.1275	33.2508	-85.1277	9.40111	-25.1305
33.1421	-83.0025	33.135	-85.0027	9.40497	-25.0055
33.025	-82.8775	33.0192	-84.8777	9.41011	-24.8805
32.9079	-82.7525	32.9034	-84.7527	9.41666	-24.7555
32.7909	-82.6275	32.7878	-84.6277	9.42514	-24.6305
32.6739	-82.5025	32.6722	-84.5027	9.43334	-24.5055
32.557	-82.3775	32.5566	-84.3777	9.44458	-24.3805
32.4402	-82.2525	32.4412	-84.2527	9.45722	-24.2555
32.3234	-82.1275	32.3258	-84.1277	9.47111	-24.1305
32.2067	-82.0025	32.2105	-84.0027	9.48638	-24.0055
32.09	-81.8775	32.0952	-83.8777	9.50318	-23.8805
31.9734	-81.7525	31.98	-83.7527	9.52134	-23.7555
31.8569	-81.6275	31.8649	-83.6277	9.5404	-23.6305
31.7403	-81.5025	31.7498	-83.5027	9.56068	-23.5055
31.6239	-81.3775	31.6349	-83.3777	9.58364	-23.3805
31.5075	-81.2525	31.52	-83.2527	9.60562	-23.2555
31.3912	-81.1275	31.4051	-83.1277	9.63054	-23.1305
31.275	-81.0025	31.2904	-83.0027	9.65678	-23.0055
31.1588	-80.8775	31.1757	-82.8777	9.68407	-22.8805
31.0427	-80.7525	31.0611	-82.7527	9.71257	-22.7554
30.9266	-80.6275	30.9465	-82.6277	9.74275	-22.6304
30.8107	-80.5025	30.8321	-82.5027	9.77422	-22.5054
30.6947	-80.3775	30.7177	-82.3777	9.8068	-22.3804
30.5789	-80.2525	30.6034	-82.2527	9.84058	-22.2554
30.4632	-80.1274	30.4892	-82.1277	9.87584	-22.1304
30.3474	-80.0024	30.375	-82.0027	9.91234	-22.0054
30.2317	-79.8774	30.2609	-81.8777	9.94983	-21.8804
30.1162	-79.7524	30.1469	-81.7527	9.98854	-21.7554
30.0007	-79.6274	30.033	-81.6277	10.028	-21.6304
29.8852	-79.5024	29.9191	-81.5027	10.0687	-21.5054
29.7699	-79.3774	29.8054	-81.3777	10.1111	-21.3804
29.6546	-79.2524	29.6917	-81.2527	10.1546	-21.2554
29.5394	-79.1274	29.5781	-81.1277	10.1995	-21.1304
29.4243	-79.0024	29.4646	-81.0027	10.2454	-21.0054
29.3092	-78.8774	29.3512	-80.8777	10.2917	-20.8804
29.1943	-78.7524	29.2379	-80.7527	10.3391	-20.7554
29.0794	-78.6274	29.1248	-80.6277	10.3885	-20.6304
28.9646	-78.5024	29.0115	-80.5027	10.439	-20.5054
28.8498	-78.3774	28.8985	-80.3777	10.4905	-20.3804
28.7352	-78.2524	28.7856	-80.2527	10.5431	-20.2554
28.6206	-78.1274	28.6727	-80.1277	10.5966	-20.1304
28.5061	-78.0024	28.56	-80.0027	10.6507	-20.0054
28.3917	-77.8774	28.4474	-79.8777	10.7063	-19.8804
28.2774	-77.7524	28.3348	-79.7527	10.7629	-19.7554
28.1631	-77.6274	28.2223	-79.6277	10.8204	-19.6304
28.049	-77.5024	28.11	-79.5027	10.879	-19.5054
27.9349	-77.3774	27.9977	-79.3777	10.9385	-19.3804
27.8209	-77.2524	27.8856	-79.2527	10.999	-19.2554
27.707	-77.1274	27.7736	-79.1277	11.0602	-19.1304
27.5932	-77.0024	27.6616	-79.0027	11.122	-19.0054
27.4795	-76.8774	27.5498	-78.8777	11.1851	-18.8804
27.3659	-76.7524	27.4381	-78.7527	11.249	-18.7554
27.2524	-76.6274	27.3264	-78.6277	11.3142	-18.6304
27.139	-76.5024	27.2149	-78.5027	11.3792	-18.5054
27.0256	-76.3774	27.1035	-78.3777	11.446	-18.3804
26.9124	-76.2524	26.9922	-78.2527	11.5137	-18.2554
26.7991	-76.1274	26.8811	-78.1277	11.5821	-18.1304
26.6859	-76.0024	26.77	-78.0027	11.6514	-18.0054
26.5732	-75.8774	26.6591	-77.8777	11.7213	-17.8804
26.4601	-75.7524	26.5482	-77.7527	11.7919	-17.7554
26.3474	-75.6274	26.4375	-77.6277	11.8632	-17.6304
26.2347	-75.5024	26.3269	-77.5027	11.9353	-17.5054
26.1222	-75.3774	26.2164	-77.3777	12.0082	-17.3804
26.0098	-75.2524	26.1061	-77.2527	12.0818	-17.2554
25.8975	-75.1274	25.9958	-77.1277	12.1572	-17.1304
25.7853	-75.0024	25.8857	-77.0027	12.2319	-17.0054
25.6732	-74.8774	25.7758	-76.8777	12.3081	-16.8804
25.5612	-74.7524	25.6659	-76.7527	12.3849	-16.7554
25.4493	-74.6274	25.5562	-76.6277	12.4625	-16.6304
25.3375	-74.5024	25.4466	-76.5027	12.5406	-16.5054
25.2259	-74.3774	25.3372	-76.3777	12.6192	-16.3804
25.1144	-74.2524	25.2279	-76.2527	12.6984	-16.2554
25.003	-74.1274	25.1187	-76.1277	12.7784	-16.1304
24.8917	-74.0024	25.0096	-76.0027	12.8591	-16.0054
24.7805	-73.8774	24.9007	-75.8777	12.9402	-15.8804
24.6695	-73.7524	24.7919	-75.7527	13.0219	-15.7554
24.5586	-73.6274	24.6833	-75.6277	13.1049	-15.6304
24.4477	-73.5024	24.5748	-75.5027	13.1877	-15.5054
24.3371	-73.3774	24.4665	-75.3777	13.2715	-15.3804
24.2265	-73.2524	24.3583	-75.2527	13.3559	-15.2554
24.1161	-73.1274	24.2502	-75.1277	13.4407	-15.1304
24.0058	-73.0024	24.1422	-75.0027	13.526	-15.0054
23.8957	-72.8774	24.0345	-74.8777	13.6121	-14.8804
23.7857	-72.7524	23.9269	-74.7527	13.6983	-14.7553
23.6758	-72.6274	23.8195	-74.6277	13.7854	-14.6303
23.5661	-72.5024	23.7122	-74.5027	13.8729	-14.5053
23.4565	-72.3774	23.6051	-74.3777	13.9608	-14.3803
23.3471	-72.2524	23.4982	-74.2527	14.049	-14.2553
23.2378	-72.1274	23.3914	-74.1277	14.138	-14.1303
23.1286	-72.0024	23.2848	-74.0027	14.2274	-14.0053
23.0196	-71.8774	23.1784	-73.8777	14.3176	-13.8803
22.9108	-71.7524	23.0721	-73.7527	14.4077	-13.7553
22.8021	-71.6274	22.966	-73.6277	14.4985	-13.6303
22.6934	-71.5024	22.8602	-73.5027	14.5897	-13.5053
22.585	-71.3774	22.7544	-73.3777	14.6816	-13.3803
22.4768	-71.2524	22.6489	-73.2527	14.7739	-13.2553
22.3687	-71.1274	22.5435	-73.1277	14.8388	-13.1282
22.2609	-71.0024	22.4382	-73.0027	14.8749	-13.0012
22.1531	-70.8774	22.3332	-72.8777	14.893	-12.8762
22.0456	-70.7524	22.2284	-72.7527	14.9121	-12.7512
21.9382	-70.6274	22.1239	-72.6277	14.9321	-12.6262
21.831	-70.5024	22.0195	-72.5027	14.953	-12.5012
21.7239	-70.3774	21.9153	-72.3777	14.9753	-12.3762
21.617	-70.2524	21.8113	-72.2527	14.9981	-12.2512
21.5103	-70.1274	21.7075	-72.1277	15.022	-12.1262
21.4038	-70.0024	21.6039	-72.0027	15.0466	-12.0012
21.2975	-69.8774	21.5005	-71.8777	15.0721	-11.8762
21.1914	-69.7524	21.3974	-71.7527	15.0984	-11.7512
21.0855	-69.6274	21.2944	-71.6277	15.1257	-11.6262
20.9797	-69.5024	21.1917	-71.5027	15.1532	-11.5012
20.8742	-69.3774	21.0892	-71.3777	15.1825	-11.3762
20.7689	-69.2524	20.9869	-71.2527	15.2126	-11.2512
20.6637	-69.1274	20.8849	-71.1277	15.2433	-11.1262
20.5587	-69.0024	20.783	-71.0027	15.2748	-11.0012
20.4539	-68.8774	20.6814	-70.8777	15.3076	-10.8762
20.3493	-68.7524	20.5801	-70.7527	15.3411	-10.7512
20.245	-68.6274	20.4789	-70.6277	15.3756	-10.6262
20.1409	-68.5024	20.3779	-70.5027	15.4108	-10.5012
20.037	-68.3774	20.2772	-70.3777	15.4468	-10.3762
19.9333	-68.2524	20.1768	-70.2527	15.4835	-10.2512
19.8299	-68.1274	20.0767	-70.1277	15.5213	-10.1262
19.7267	-68.0024	19.9768	-70.0027	15.5593	-10.0012
19.6237	-67.8774	19.8772	-69.8777	15.5987	-9.8762
19.521	-67.7524	19.7779	-69.7527	15.6388	-9.7512
19.4185	-67.6274	19.6788	-69.6277	15.6798	-9.6262
19.3162	-67.5024	19.58	-69.5027	15.7215	-9.5012
19.2142	-67.3774	19.4815	-69.3777	15.7642	-9.3762
19.1124	-67.2524	19.3832	-69.2527	15.8076	-9.2512
19.0109	-67.1274	19.2856	-69.1277	15.8515	-9.1262
18.9097	-67.0024	19.1874	-69.0027	15.8963	-9.00119
18.8087	-66.8774	19.0901	-68.8777	15.9419	-8.87619
18.708	-66.7524	18.9927	-68.7527	15.9882	-8.75119
18.6075	-66.6274	18.8959	-68.6277	16.0354	-8.62619
18.5073	-66.5024	18.7994	-68.5027	16.0831	-8.50119
18.4074	-66.3774	18.7033	-68.3777	16.1318	-8.37619
18.3077	-66.2524	18.6073	-68.2527	16.1811	-8.25119
18.2083	-66.1274	18.5117	-68.1277	16.2315	-8.12619
18.1092	-66.0024	18.4165	-68.0027	16.2824	-8.00119
18.0104	-65.8774	18.3216	-67.8777	16.3341	-7.87619
17.9119	-65.7524	18.227	-67.7527	16.3864	-7.75119
17.8137	-65.6274	18.1327	-67.6277	16.4395	-7.62618
17.7158	-65.5024	18.0388	-67.5027	16.4931	-7.50118
17.6182	-65.3774	17.9452	-67.3777	16.5476	-7.37618
17.521	-65.2524	17.8519	-67.2527	16.6028	-7.25118
17.4241	-65.1274	17.7591	-67.1277	16.6585	-7.12618
17.3275	-65.0024	17.6666	-67.0027	16.7148	-7.00117
17.2312	-64.8774	17.5744	-66.8777	16.772	-6.87617
17.1352	-64.7524	17.4826	-66.7527	16.8298	-6.75117
17.0396	-64.6274	17.391	-66.6277	16.8882	-6.62617
16.9444	-64.5024	17.2999	-66.5027	16.9473	-6.50117
16.8495	-64.3774	17.2092	-66.3777	17.007	-6.37617
16.7549	-64.2524	17.1189	-66.2527	17.0673	-6.25117
16.6607	-64.1274	17.0291	-66.1277	17.1288	-6.12617
16.5669	-64.0024	16.9396	-66.0027	17.1902	-6.00116
16.4734	-63.8774	16.8505	-65.8777	17.2527	-5.87616
16.3803	-63.7524	16.7619	-65.7527	17.3158	-5.75116
16.2876	-63.6274	16.6736	-65.6277	17.3795	-5.62616
16.1953	-63.5024	16.5857	-65.5027	17.4437	-5.50116
16.1034	-63.3774	16.4984	-65.3777	17.5083	-5.37616
16.0119	-63.2524	16.4114	-65.2527	17.5734	-5.25116
15.9208	-63.1274	16.325	-65.1277	17.6395	-5.12616
15.8301	-63.0024	16.2389	-65.0027	17.7062	-5.00116
15.7399	-62.8774	16.1533	-64.8777	17.7731	-4.87616
15.6501	-62.7524	16.0682	-64.7527	17.8406	-4.75115
15.5607	-62.6274	15.9837	-64.6277	17.9087	-4.62615
15.4717	-62.5024	15.8991	-64.5027	17.9775	-4.50115
15.3832	-62.3774	15.8155	-64.3776	18.047	-4.37615
15.2951	-62.2524	15.7317	-64.2526	18.117	-4.25115
15.2075	-62.1274	15.649	-64.1276	18.1876	-4.12615
15.1204	-62.0024	15.5668	-64.0026	18.2588	-4.00115
15.0338	-61.8774	15.4851	-63.8776	18.3304	-3.87615
14.9476	-61.7524	15.4039	-63.7526	18.4026	-3.75115
14.8619	-61.6274	15.3233	-63.6276	18.4753	-3.62615
14.7767	-61.5024	15.2432	-63.5026	18.5483	-3.50115
14.6921	-61.3774	15.1636	-63.3776	18.6218	-3.37615
14.6079	-61.2524	15.0846	-63.2526	18.6955	-3.25115
14.5243	-61.1274	15.0061	-63.1276	18.7702	-3.12615
14.4412	-61.0024	14.9282	-63.0026	18.8454	-3.00115
14.3586	-60.8774	14.8509	-62.8776	18.9205	-2.87614
14.2766	-60.7524	14.7742	-62.7526	18.9953	-2.75113
14.195	-60.6274	14.698	-62.6276	19.069	-2.6259
14.1141	-60.5024	14.6224	-62.5026	19.1432	-2.50068
14.0337	-60.3774	14.5436	-62.3776	19.1578	-2.37536
13.9539	-60.2524	14.4608	-62.2526	19.1703	-2.25003
13.8748	-60.1274	14.3785	-62.1276	19.1794	-2.12502
13.7962	-60.0024	14.2968	-62.0026	19.1888	-2.00001
13.7182	-59.8774	14.2157	-61.8776	19.1995	-1.87501
13.6409	-59.7524	14.1351	-61.7526	19.2109	-1.75001
13.5618	-59.6274	14.055	-61.6276	19.223	-1.62501
13.4769	-59.5024	13.9756	-61.5026	19.2358	-1.50001
13.3925	-59.3774	13.8968	-61.3776	19.2494	-1.37501
13.3087	-59.2524	13.8186	-61.2526	19.2637	-1.25001
13.2255	-59.1274	13.7409	-61.1276	19.2791	-1.12501
13.1428	-59.0024	13.6639	-61.0026	19.2943	-1.00001
13.0607	-58.8774	13.5875	-60.8776	19.3111	-0.875
12.9792	-58.7524	13.5118	-60.7526	19.3279	-0.75
12.8983	-58.6274	13.4367	-60.6276	19.3458	-0.625
12.818	-58.5024	13.3622	-60.5026	19.3645	-0.5
12.7384	-58.3774	13.2883	-60.3776	19.3839	-0.375
12.6594	-58.2524	13.2151	-60.2526	19.404	-0.25
12.581	-58.1274	13.1423	-60.1276	19.4247	-0.125
12.5034	-58.0024	13.0701	-60.0026	19.446	0
12.4263	-57.8774	12.9992	-59.8776	19.468	0.125
12.35	-57.7524	12.9284	-59.7526	19.4908	0.25
12.2744	-57.6274	12.8587	-59.6276	19.5142	0.375
12.1994	-57.5024	12.7897	-59.5026	19.5383	0.5
12.1249	-57.3774	12.7216	-59.3776	19.5631	0.625
12.0512	-57.2524	12.6543	-59.2526	19.5887	0.75
11.9784	-57.1274	12.5874	-59.1275	19.6154	0.875
11.9064	-57.0024	12.5211	-59.0025	19.6423	1.00001
11.8351	-56.8774	12.4575	-58.8774	19.6702	1.12501
11.7647	-56.7524	12.3883	-58.7523	19.6987	1.25001
11.695	-56.6274	12.3165	-58.6273	19.6909	1.3753
11.626	-56.5024	12.2455	-58.5023	19.6828	1.5006
11.558	-56.3774	12.1753	-58.3773	19.6703	1.6256
11.4908	-56.2524	12.1058	-58.2523	19.6585	1.7506
11.4244	-56.1274	12.0371	-58.1273	19.6479	1.8756
11.3589	-56.0024	11.9692	-58.0023	19.6374	2.00061
11.2942	-55.8774	11.9021	-57.8773	19.628	2.12561
11.2304	-55.7524	11.8359	-57.7523	19.6193	2.25061
11.1675	-55.6274	11.7705	-57.6273	19.6113	2.37561
11.1055	-55.5024	11.7059	-57.5023	19.6038	2.50061
11.0444	-55.3773	11.642	-57.3773	19.5974	2.62561
10.9834	-55.2523	11.579	-57.2523	19.5917	2.75061
10.9252	-55.1273	11.5171	-57.1273	19.5866	2.87562
10.8652	-55.0023	11.4558	-57.0023	19.5819	3.00062
10.8076	-54.8773	11.3956	-56.8773	19.5783	3.12562
10.7342	-54.7523	11.3362	-56.7523	19.5754	3.25062
10.6617	-54.6273	11.2779	-56.6273	19.5733	3.37562
10.59	-54.5023	11.2204	-56.5023	19.5718	3.50062
10.5192	-54.3773	11.164	-56.3773	19.5711	3.62562
10.4493	-54.2523	11.1085	-56.2523	19.571	3.75062
10.3802	-54.1273	11.0542	-56.1273	19.5716	3.87562
10.3121	-54.0023	11.0004	-56.0023	19.5729	4.00062
10.2449	-53.8773	10.948	-55.8773	19.5752	4.12562
10.1786	-53.7523	10.8966	-55.7523	19.5781	4.25063
10.1133	-53.6273	10.8463	-55.6273	19.5817	4.37563
10.0489	-53.5023	10.7968	-55.5023	19.586	4.50063
9.98557	-53.3773	10.7485	-55.3773	19.5913	4.62563
9.92321	-53.2523	10.7012	-55.2523	19.5972	4.75063
9.86188	-53.1273	10.6549	-55.1273	19.5908	4.87687
9.80157	-53.0023	10.6098	-55.0022	19.585	5.0031
9.74232	-52.8773	10.5659	-54.8772	19.5159	5.1281
9.68414	-52.7523	10.5229	-54.7522	19.4471	5.2531
9.62705	-52.6273	10.4787	-54.6272	19.3788	5.3781
9.57105	-52.5023	10.4308	-54.5022	19.311	5.5031
9.51618	-52.3773	10.3824	-54.3772	19.2437	5.6281
9.46244	-52.2523	10.335	-54.2522	19.177	5.7531
9.40979	-52.1273	10.2889	-54.1272	19.1108	5.8781
9.35832	-52.0023	10.2431	-54.0022	19.0451	6.0031
9.30809	-51.8773	10.1954	-53.877	18.98	6.1281
9.25883	-51.7523	10.1433	-53.7519	18.9153	6.2531
9.21101	-51.6273	10.0677	-53.6269	18.8513	6.3781
9.16442	-51.5023	9.99283	-53.5019	18.7877	6.5031
9.11909	-51.3773	9.91886	-53.3769	18.7248	6.6281
9.07502	-51.2523	9.84576	-53.2519	18.6621	6.7531
9.03223	-51.1273	9.77354	-53.1269	18.6002	6.8781
8.99073	-51.0023	9.70222	-53.0019	18.5389	7.0031
8.95055	-50.8773	9.63181	-52.8769	18.4779	7.12811
8.9117	-50.7523	9.56234	-52.7519	18.4175	7.25313
8.87418	-50.6273	9.49431	-52.6268	18.3579	7.37813
8.83803	-50.5023	9.42632	-52.5018	18.299	7.50313
8.80324	-50.3773	9.35994	-52.3768	18.241	7.62822
8.76983	-50.2523	9.29412	-52.2518	18.1832	7.75331
8.73783	-50.1273	9.22959	-52.1268	18.1262	7.87831
8.70723	-50.0023	9.1661	-52.0018	18.0697	8.00331
8.67805	-49.8773	9.10367	-51.8768	18.0143	8.12832
8.65031	-49.7523	9.04231	-51.7518	17.9593	8.25332
8.62386	-49.6273	8.98205	-51.6268	17.9044	8.37832
8.59871	-49.5023	8.92291	-51.5018	17.8502	8.50332
8.57528	-49.3773	8.86489	-51.3768	17.797	8.62832
8.55325	-49.2523	8.80803	-51.2518	17.7444	8.75333
8.53262	-49.1273	8.75233	-51.1268	17.6924	8.87838
8.51347	-49.0023	8.69783	-51.0018	17.6406	9.00344
8.49583	-48.8773	8.64452	-50.8768	17.59	9.12844
8.4665	-48.7523	8.59245	-50.7518	17.5401	9.25344
8.40983	-48.6273	8.5415	-50.6268	17.491	9.37844
8.35438	-48.5023	8.49173	-50.5018	17.4424	9.50344
8.3006	-48.3773	8.44361	-50.3768	17.3946	9.62844
8.24688	-48.2523	8.39644	-50.2518	17.3475	9.75344
8.19517	-48.1273	8.35079	-50.1268	17.3011	9.87844
8.14476	-48.0023	8.30644	-50.0018	17.2554	10.0034
8.09568	-47.8773	8.26324	-49.8768	17.2103	10.1284
8.04793	-47.7523	8.22135	-49.7518	17.1658	10.2534
8.00154	-47.6273	8.18115	-49.6268	17.1219	10.3784
7.95652	-47.5023	8.14235	-49.5018	17.0787	10.5035
7.91289	-47.3773	8.10497	-49.3768	17.0363	10.6285
7.87068	-47.2523	8.06903	-49.2518	16.9945	10.7535
7.82958	-47.1273	8.03466	-49.1268	16.9543	10.8785
7.78993	-47.0023	8.00122	-49.0017	16.9145	11.0035
7.75206	-46.8773	7.96962	-48.8767	16.8753	11.1285
7.71567	-46.7523	7.93952	-48.7517	16.8365	11.2535
7.65703	-46.6271	7.91092	-48.6267	16.7984	11.3785
7.56996	-46.502	7.88384	-48.5017	16.7611	11.5035
7.48257	-46.377	7.85781	-48.3767	16.7248	11.6285
7.39602	-46.252	7.83332	-48.2517	16.6893	11.7535
7.31035	-46.127	7.78669	-48.1266	16.6543	11.8785
7.2256	-46.002	7.709	-48.0016	16.6201	12.0035
7.14199	-45.877	7.63101	-47.8766	16.5873	12.1285
7.05903	-45.752	7.55403	-47.7516	16.5546	12.2535
6.97727	-45.627	7.47816	-47.6266	16.5232	12.3785
6.89652	-45.502	7.40336	-47.5016	16.4925	12.5035
6.81683	-45.377	7.32874	-47.3764	16.4622	12.6285
6.73821	-45.252	7.25204	-47.2514	16.4328	12.7535
6.66071	-45.127	7.14925	-47.1264	16.4041	12.8785
6.58434	-45.002	7.04689	-47.0014	16.3763	13.0035
6.50915	-44.877	6.94511	-46.8764	16.3501	13.1285
6.43516	-44.752	6.84391	-46.7514	16.3243	13.2535
6.36241	-44.627	6.74327	-46.6264	16.2994	13.3785
6.29068	-44.502	6.64327	-46.5014	16.2748	13.5035
6.22039	-44.377	6.54393	-46.3764	16.2511	13.6285
6.15118	-44.252	6.44503	-46.2513	16.2282	13.7535
6.08371	-44.127	6.34701	-46.1263	16.2069	13.8785
6.01764	-44.002	6.24974	-46.0013	16.1853	14.0035
5.95289	-43.877	6.15336	-45.8763	16.1654	14.1285
5.88963	-43.752	6.05777	-45.7513	16.1464	14.2535
5.82799	-43.627	5.96312	-45.6263	16.128	14.3785
5.76791	-43.502	5.86932	-45.5013	16.1101	14.5035
5.70942	-43.377	5.77642	-45.3763	16.0938	14.6285
5.65255	-43.252	5.68445	-45.2513	16.0779	14.7535
5.59735	-43.127	5.59345	-45.1263	16.063	14.8785
5.54385	-43.002	5.50344	-45.0013	16.0488	15.0035
5.49209	-42.877	5.41447	-44.8763	16.0353	15.1285
5.44185	-42.752	5.32657	-44.7513	16.0226	15.2535
5.39364	-42.627	5.2395	-44.6263	16.0109	15.3785
5.34702	-42.502	5.15358	-44.5013	16.0001	15.5035
5.30258	-42.377	5.06914	-44.3763	15.99	15.6285
5.26005	-42.252	4.98594	-44.2513	15.9808	15.7535
5.21948	-42.127	4.90389	-44.1263	15.9734	15.8786
5.1809	-42.002	4.82317	-44.0013	15.9657	16.0036
5.14447	-41.8769	4.74398	-43.8763	15.9596	16.1286
5.10919	-41.7519	4.66623	-43.7513	15.9544	16.2536
5.07736	-41.6269	4.58996	-43.6263	15.9497	16.3786
5.03094	-41.5019	4.51522	-43.5013	15.9458	16.5036
4.97421	-41.3769	4.44195	-43.3763	15.9427	16.6286
4.91932	-41.2519	4.37033	-43.2513	15.9405	16.7536
4.8663	-41.1269	4.30019	-43.1263	15.9398	16.8786
4.8152	-41.0019	4.23172	-43.0013	15.94	17.0036
4.76641	-40.8769	4.16546	-42.8762	15.9404	17.1286
4.71906	-40.7519	4.0999	-42.7512	15.9418	17.2536
4.67409	-40.6269	4.03855	-42.6261	15.9446	17.3786
4.63122	-40.5019	3.96064	-42.501	15.9483	17.5036
4.5905	-40.3769	3.87793	-42.376	15.9522	17.6286
4.55195	-40.2519	3.79678	-42.251	15.9571	17.7536
4.51563	-40.1269	3.71725	-42.126	15.9628	17.8786
4.48157	-40.0019	3.63941	-42.001	15.9694	18.0036
4.4498	-39.8769	3.56335	-41.876	15.9771	18.1286
4.42017	-39.7519	3.48909	-41.751	15.9858	18.2536
4.3929	-39.6269	3.41664	-41.626	15.995	18.3786
4.36784	-39.5019	3.34619	-41.501	16.0051	18.5036
4.34558	-39.3769	3.27793	-41.376	16.0169	18.6286
4.32578	-39.2519	3.21141	-41.251	16.0281	18.7536
4.30854	-39.1269	3.14776	-41.126	16.0408	18.8786
4.29342	-39.0019	3.08569	-41.001	16.0543	19.0036
4.28105	-38.8769	3.02649	-40.876	16.07	19.1287
4.27066	-38.7519	2.96967	-40.751	16.0842	19.2537
4.26341	-38.6269	2.91553	-40.626	16.1008	19.3787
4.25871	-38.5019	2.86394	-40.5009	16.1179	19.5037
4.2564	-38.3769	2.81534	-40.3759	16.1362	19.6287
4.25665	-38.2519	2.76961	-40.2509	16.155	19.7537
4.25962	-38.1269	2.72684	-40.1259	16.1745	19.8787
4.26514	-38.0019	2.68694	-40.0009	16.1949	20.0037
4.27288	-37.8768	2.65031	-39.8759	16.2161	20.1287
4.28315	-37.7518	2.61671	-39.7509	16.2382	20.2537
4.2962	-37.6268	2.58641	-39.6259	16.2611	20.3787
4.31145	-37.5018	2.55945	-39.5009	16.2848	20.5037
4.32923	-37.3768	2.53577	-39.3759	16.3094	20.6287
4.34949	-37.2518	2.51554	-39.2509	16.3348	20.7537
4.37199	-37.1268	2.4994	-39.1259	16.3616	20.8787
4.37799	-37.0018	2.4863	-39.0009	16.3889	21.0038
4.37889	-36.8768	2.47714	-38.8759	16.417	21.1288
4.38233	-36.7518	2.47158	-38.7509	16.4458	21.2538
4.38809	-36.6268	2.46926	-38.6259	16.4752	21.3788
4.39638	-36.5018	2.47044	-38.5009	16.5055	21.5038
4.40743	-36.3768	2.47555	-38.3759	16.5365	21.6288
4.421	-36.2518	2.48385	-38.2508	16.5684	21.7538
4.43706	-36.1268	2.49631	-38.1258	16.6014	21.8788
4.4556	-36.0018	2.51231	-38.0008	16.6352	22.0038
4.4766	-35.8768	2.53144	-37.8758	16.6694	22.1288
4.49981	-35.7518	2.55374	-37.7508	16.7044	22.2538
4.5252	-35.6268	2.58019	-37.6258	16.741	22.3788
4.55277	-35.5018	2.60921	-37.5008	16.7778	22.5038
4.58332	-35.3768	2.64207	-37.3758	16.8152	22.6288
4.61617	-35.2518	2.67789	-37.2508	16.8533	22.7538
4.6513	-35.1268	2.71672	-37.1258	16.8921	22.8788
4.68866	-35.0018	2.75861	-37.0008	16.9317	23.0038
4.72777	-34.8768	2.79592	-36.8758	16.9729	23.1288
4.73881	-34.7518	2.81359	-36.7508	17.0136	23.2538
4.74379	-34.6268	2.83361	-36.6258	17.0557	23.3788
4.75092	-34.5018	2.8567	-36.5008	17.0986	23.5038
4.76088	-34.3768	2.88299	-36.3758	17.1419	23.6288
4.77252	-34.2518	2.91242	-36.2508	17.1859	23.7538
4.78705	-34.1268	2.94534	-36.1258	17.2307	23.8788
4.80391	-34.0018	2.98098	-36.0008	17.276	24.0038
4.82288	-33.8768	3.01955	-35.8758	17.3221	24.1288
4.84393	-33.7518	3.06097	-35.7508	17.369	24.2538
4.86754	-33.6268	3.10533	-35.6258	17.4165	24.3788
4.8934	-33.5018	3.15196	-35.5008	17.4647	24.5038
4.92128	-33.3768	3.20177	-35.3758	17.5136	24.6288
4.9509	-33.2518	3.2539	-35.2508	17.5633	24.7538
4.983	-33.1268	3.30885	-35.1258	17.6135	24.8788
5.01724	-33.0018	3.36594	-35.0008	17.6645	25.0038
5.05356	-32.8768	3.42568	-34.8758	17.7161	25.1288
5.09195	-32.7518	3.48707	-34.7507	17.7684	25.2538
5.13341	-32.6268	3.55099	-34.6257	17.822	25.3788
5.17522	-32.5017	3.61702	-34.5007	17.8757	25.5038
5.21986	-32.3767	3.68509	-34.3757	17.9302	25.6288
5.26642	-32.2517	3.75512	-34.2507	17.9853	25.7538
5.31486	-32.1267	3.82689	-34.1257	18.0414	25.8788
5.36514	-32.0017	3.90041	-34.0007	18.0972	26.0038
5.41722	-31.8767	3.97646	-33.8757	18.1539	26.1288
5.47099	-31.7517	4.05322	-33.7505	18.2113	26.2538
5.52629	-31.6267	4.13228	-33.6255	18.2694	26.3788
5.58328	-31.5017	4.21288	-33.5005	18.3279	26.5039
5.64192	-31.3767	4.29488	-33.3755	18.3873	26.6289
5.70217	-31.2517	4.37826	-33.2505	18.4471	26.7539
5.76423	-31.1267	4.46289	-33.1255	18.5035	26.8789
5.82761	-31.0017	4.5488	-33.0005	18.5602	27.004
5.89269	-30.8767	4.63628	-32.8755	18.6059	27.1291
5.95902	-30.7517	4.7249	-32.7505	18.6524	27.2543
6.02677	-30.6267	4.8146	-32.6255	18.6958	27.3793
6.09591	-30.5017	4.90525	-32.5005	18.7399	27.5043
6.1664	-30.3767	4.99673	-32.3755	18.7846	27.6293
6.23822	-30.2517	5.08925	-32.2505	18.83	27.7543
6.3111	-30.1267	5.18311	-32.1255	18.876	27.8793
6.38524	-30.0017	5.27792	-32.0005	18.9227	28.0043
6.46183	-29.8766	5.37365	-31.8755	18.97	28.1293
6.53755	-29.7516	5.47027	-31.7505	19.0179	28.2543
6.61568	-29.6266	5.56789	-31.6255	19.0665	28.3793
6.69493	-29.5016	5.66603	-31.5005	19.1158	28.5043
6.77526	-29.3766	5.76512	-31.3755	19.1656	28.6293
6.85664	-29.2516	5.86497	-31.2505	19.2159	28.7543
6.93904	-29.1266	5.96554	-31.1255	19.2622	28.8794
7.02244	-29.0016	6.0668	-31.0005	19.302	29.0045
7.10681	-28.8766	6.16874	-30.8755	19.3217	29.1295
7.19212	-28.7516	6.27132	-30.7505	19.341	29.2545
7.27825	-28.6266	6.37452	-30.6255	19.3616	29.3795
7.36515	-28.5016	6.47832	-30.5005	19.3828	29.5045
7.4529	-28.3766	6.58269	-30.3755	19.4045	29.6295
7.54149	-28.2516	6.68759	-30.2505	19.427	29.7545
7.63092	-28.1266	6.79302	-30.1255	19.4502	29.8795
7.72115	-28.0016	6.89897	-30.0005	19.4741	30.0045
7.81215	-27.8766	7.00541	-29.8755	19.4987	30.1295
7.9039	-27.7516	7.11234	-29.7505	19.5239	30.2545
7.99687	-27.6266	7.21973	-29.6255	19.5499	30.3795
8.08979	-27.5016	7.32756	-29.5005	19.5767	30.5045
8.18388	-27.3766	7.43582	-29.3755	19.605	30.6295
8.27863	-27.2516	7.5445	-29.2505	19.6324	30.7545
8.37374	-27.1266	7.65358	-29.1255	19.6617	30.8795
8.46948	-27.0016	7.76305	-29.0005	19.6915	31.0045
8.56614	-26.8766	7.87286	-28.8755	19.7219	31.1295
8.66339	-26.7516	7.98303	-28.7505	19.7529	31.2545
8.76116	-26.6266	8.09355	-28.6255	19.7846	31.3795
8.85921	-26.5016	8.2044	-28.5005	19.817	31.5045
8.95779	-26.3765	8.31559	-28.3755	19.8501	31.6295
9.05644	-26.2515	8.42709	-28.2505	19.8838	31.7545
9.1565	-26.1265	8.5389	-28.1255	19.9182	31.8795
9.25706	-26.0015	8.65101	-28.0005	19.9532	32.0045
9.28305	-25.8759	8.76363	-27.8755	19.9888	32.1295
9.23471	-25.7504	8.8761	-27.7505	20.025	32.2545
9.17781	-25.6254	8.98911	-27.6255	20.0618	32.3795
9.12205	-25.5004	9.10237	-27.5005	20.0993	32.5045
9.06745	-25.3754	9.21588	-27.3755	20.1374	32.6295
9.01403	-25.2504	9.32964	-27.2505	20.1761	32.7545
8.96179	-25.1254	9.44364	-27.1255	20.2155	32.8795
8.91077	-25.0004	9.55787	-27.0005	20.2555	33.0045
8.86104	-24.8754	9.67232	-26.8755	20.2962	33.1295
8.81244	-24.7504	9.78695	-26.7505	20.3375	33.2545
8.76519	-24.6254	9.90173	-26.6255	20.3802	33.3795
8.71922	-24.5004	10.0167	-26.5004	20.4227	33.5045
8.67454	-24.3754	10.1315	-26.3754	20.466	33.6295
8.63115	-24.2504	10.2464	-26.2503	20.51	33.7545
8.58907	-24.1254	10.362	-26.1253	20.5546	33.8795
8.54835	-24.0004	10.4778	-26.0003	20.5998	34.0045
8.50898	-23.8754	10.4989	-25.8753	20.6454	34.1295
8.47099	-23.7504	10.424	-25.7502	20.6916	34.2545
8.43436	-23.6254	10.3488	-25.6252	20.7384	34.3795
8.39897	-23.5004	10.2734	-25.5002	20.7858	34.5045
8.36524	-23.3754	10.1994	-25.3752	20.8338	34.6295
8.33295	-23.2504	10.1263	-25.2502	20.8824	34.7545
8.30211	-23.1254	10.054	-25.1252	20.9315	34.8795
8.27273	-23.0004	9.98264	-25.0002	20.9812	35.0045
8.24483	-22.8754	9.91218	-24.8752	21.0325	35.1295
8.21842	-22.7504	9.84264	-24.7502	21.0834	35.2545
8.19347	-22.6254	9.77405	-24.6252	21.1351	35.3795
8.17004	-22.5004	9.70643	-24.5002	21.1872	35.5045
8.14813	-22.3754	9.63978	-24.3752	21.24	35.6295
8.12775	-22.2504	9.57412	-24.2502	21.2933	35.7545
8.10891	-22.1254	9.50949	-24.1252	21.3471	35.8795
8.09163	-22.0004	9.44588	-24.0002	21.4014	36.0045
8.07591	-21.8754	9.38332	-23.8752	21.4561	36.1295
8.06175	-21.7504	9.32175	-23.7502	21.5114	36.2545
8.04917	-21.6254	9.26124	-23.6252	21.5673	36.3795
8.03816	-21.5004	9.20184	-23.5002	21.6236	36.5045
8.02875	-21.3754	9.14372	-23.3752	21.6811	36.6295
8.02092	-21.2504	9.08644	-23.2502	21.7386	36.7546
8.01469	-21.1254	9.03069	-23.1252	21.7968	36.8796
8.01005	-21.0004	8.97533	-23.0002	21.8554	37.0046
8.00702	-20.8754	8.91126	-22.8752	21.9145	37.1296
8.00558	-20.7504	8.84167	-22.7502	21.974	37.2546
8.00575	-20.6254	8.77278	-22.6252	22.034	37.3796
8.00752	-20.5004	8.70494	-22.5002	22.0944	37.5046
8.01089	-20.3754	8.63829	-22.3752	22.1559	37.6296
8.01585	-20.2504	8.57273	-22.2502	22.2173	37.7546
8.02242	-20.1254	8.50827	-22.1252	22.2794	37.8796
8.03058	-20.0004	8.44494	-22.0002	22.3421	38.0046
8.04032	-19.8754	8.38276	-21.8752	22.4052	38.1296
8.05165	-19.7504	8.32174	-21.7502	22.4688	38.2546
8.06456	-19.6254	8.26191	-21.6252	22.5329	38.3796
8.07905	-19.5004	8.20329	-21.5002	22.5973	38.5046
8.09549	-19.3754	8.14587	-21.3752	22.6621	38.6296
8.1125	-19.2504	8.08964	-21.2502	22.7274	38.7546
8.1317	-19.1254	8.03479	-21.1252	22.7932	38.8796
8.15243	-19.0004	7.98111	-21.0002	22.8594	39.0046
8.1747	-18.8754	7.92886	-20.8752	22.9261	39.1296
8.19849	-18.7504	7.87796	-20.7502	22.9932	39.2546
8.22379	-18.6254	7.82841	-20.6252	23.0608	39.3796
8.25059	-18.5004	7.78025	-20.5002	23.1288	39.5046
8.27887	-18.3754	7.73341	-20.3752	23.1981	39.6296
8.30863	-18.2504	7.68799	-20.2502	23.2664	39.7546
8.33973	-18.1254	7.6441	-20.1252	23.336	39.8796
8.37216	-18.0004	7.60163	-20.0002	23.4059	40.0046
8.40617	-17.8754	7.56061	-19.8752	23.4762	40.1296
8.44117	-17.7504	7.52105	-19.7502	23.547	40.2546
8.47804	-17.6254	7.48283	-19.6252	23.6182	40.3796
8.51629	-17.5004	7.44615	-19.5002	23.6898	40.5046
8.55585	-17.3754	7.41134	-19.3752	23.762	40.6296
8.59668	-17.2504	7.3781	-19.2502	23.8343	40.7546
8.63886	-17.1254	7.34646	-19.1252	23.9069	40.8796
8.68236	-17.0004	7.31644	-19.0002	23.98	41.0046
8.72717	-16.8754	7.28804	-18.8752	24.0535	41.1296
8.77328	-16.7504	7.26129	-18.7502	24.1274	41.2546
8.82066	-16.6254	7.2362	-18.6252	24.2017	41.3796
8.8693	-16.5004	7.21278	-18.5002	24.2763	41.5046
8.91919	-16.3754	7.19105	-18.3752	24.3384	41.6309
8.9703	-16.2504	7.17099	-18.2502	24.3853	41.7573
9.02262	-16.1254	7.15256	-18.1252	24.3819	41.8823
9.07613	-16.0004	7.13586	-18.0002	24.379	42.0073
9.13081	-15.8754	7.12089	-17.8752	24.3768	42.1323
9.18665	-15.7504	7.10766	-17.7502	24.3751	42.2573
9.24363	-15.6254	7.09617	-17.6252	24.3741	42.3823
9.30172	-15.5004	7.08644	-17.5002	24.3736	42.5073
9.3609	-15.3754	7.07882	-17.3752	24.3742	42.6323
9.42118	-15.2504	7.07234	-17.2502	24.3751	42.7573
9.43959	-15.1254	7.068	-17.1252	24.3764	42.8823
9.38906	-15.0004	7.06543	-17.0002	24.3784	43.0073
9.33917	-14.8754	7.06463	-16.8752	24.3809	43.1323
9.29046	-14.7504	7.0656	-16.7502	24.3841	43.2573
9.24292	-14.6254	7.06835	-16.6252	24.3879	43.3823
9.1966	-14.5004	7.07286	-16.5002	24.3922	43.5073
9.15155	-14.3754	7.07915	-16.3752	24.3971	43.6323
9.10767	-14.2504	7.08719	-16.2502	24.4025	43.7573
9.06504	-14.1254	7.09683	-16.1252	24.4086	43.8823
9.0237	-14.0004	7.10823	-16.0002	24.4152	44.0073
8.98366	-13.8754	7.12153	-15.8751	24.4225	44.1323
8.94492	-13.7504	7.13653	-15.7501	24.4304	44.2573
8.90489	-13.6253	7.1532	-15.6251	24.4389	44.3823
8.85789	-13.5003	7.17158	-15.5001	24.448	44.5073
8.81251	-13.3753	7.1911	-15.3751	24.4577	44.6323
8.76843	-13.2503	7.21171	-15.2501	24.468	44.7573
8.72566	-13.1253	7.17101	-15.1251	24.4789	44.8823
8.68423	-13.0003	7.11264	-15.0001	24.4903	45.0073
8.64415	-12.8753	7.05323	-14.8751	24.5022	45.1323
8.60544	-12.7503	6.9952	-14.7501	24.5147	45.2573
8.56811	-12.6253	6.93824	-14.6251	24.5278	45.3823
8.53215	-12.5003	6.88271	-14.5001	24.5415	45.5073
8.49757	-12.3753	6.82899	-14.3751	24.5558	45.6323
8.46442	-12.2503	6.77677	-14.2501	24.5707	45.7573
8.4327	-12.1253	6.72607	-14.1251	24.5861	45.8823
8.40244	-12.0003	6.67691	-14.0001	24.6021	46.0073
8.37365	-11.8753	6.62934	-13.8751	24.6188	46.1323
8.34634	-11.7503	6.58336	-13.7501	24.636	46.2573
8.32067	-11.6253	6.53898	-13.6251	24.6545	46.3823
8.2961	-11.5003	6.49616	-13.5001	24.6726	46.5074
8.27336	-11.3753	6.45502	-13.3751	24.6917	46.6324
8.25215	-11.2503	6.41558	-13.2501	24.7114	46.7574
8.23248	-11.1253	6.37787	-13.1251	24.7317	46.8824
8.21435	-11.0003	6.34192	-13.0001	24.7526	47.0074
8.1977	-10.8753	6.30775	-12.8751	24.7739	47.1324
8.18252	-10.7503	6.27539	-12.7501	24.7957	47.2574
8.16899	-10.6253	6.24543	-12.6251	24.8181	47.3824
8.15702	-10.5003	6.2163	-12.5001	24.841	47.5074
8.14663	-10.3753	6.18956	-12.3751	24.8647	47.6324
8.13782	-10.2503	6.1647	-12.2501	24.8888	47.7574
8.1306	-10.1253	6.14179	-12.1251	24.9135	47.8824
8.12497	-10.0003	6.1208	-12.0001	24.9388	48.0074
8.12095	-9.87534	6.10175	-11.8751	24.9646	48.1324
8.11851	-9.75034	6.08464	-11.7501	24.9909	48.2574
8.11761	-9.62534	6.0695	-11.6251	25.0178	48.3824
8.1183	-9.50034	6.05632	-11.5001	25.0453	48.5074
8.12067	-9.37534	6.04478	-11.3751	25.0733	48.6324
8.12463	-9.25034	6.03522	-11.2501	25.1018	48.7574
8.1302	-9.12534	6.02802	-11.1251	25.1309	48.8824
8.13735	-9.00034	6.02282	-11.0001	25.1606	49.0074
8.14609	-8.87534	6.01963	-10.8751	25.1908	49.1324
8.15642	-8.75034	6.01845	-10.7501	25.2215	49.2574
8.16821	-8.62534	6.01928	-10.6251	25.2528	49.3824
8.18152	-8.50034	6.02212	-10.5001	25.2846	49.5074
8.19684	-8.37533	6.02687	-10.3751	25.317	49.6324
8.21261	-8.25033	6.03358	-10.2501	25.3499	49.7574
8.23085	-8.12533	6.04229	-10.1251	25.3833	49.8824
8.25063	-8.00033	6.05299	-10.0001	25.4173	50.0074
8.27194	-7.87533	6.06568	-9.87506	25.4518	50.1324
8.29478	-7.75033	6.08034	-9.75006	25.4868	50.2574
8.31928	-7.62532	6.09697	-9.62506	25.5236	50.3824
8.34436	-7.50032	6.1155	-9.50006	25.5597	50.5074
8.37165	-7.37532	6.13588	-9.37506	25.5966	50.6324
8.40042	-7.25032	6.15817	-9.25006	25.6337	50.7574
8.4305	-7.12532	6.18238	-9.12506	25.6715	50.8824
8.46204	-7.00032	6.20847	-9.00006	25.7099	51.0074
8.49517	-6.87532	6.23644	-8.87506	25.7487	51.1324
8.52974	-6.75032	6.26625	-8.75006	25.7881	51.2574
8.56571	-6.62532	6.2979	-8.62506	25.8278	51.3824
8.60309	-6.50032	6.33136	-8.50006	25.868	51.5074
8.64184	-6.37532	6.36661	-8.37506	25.909	51.6324
8.68197	-6.25032	6.40362	-8.25006	25.9502	51.7574
8.72344	-6.12532	6.44235	-8.12506	25.9921	51.8824
8.76616	-6.00032	6.48279	-8.00006	26.0344	52.0074
8.81012	-5.87532	6.52491	-7.87506	26.0773	52.1324
8.85539	-5.75032	6.56871	-7.75006	26.1206	52.2574
8.90194	-5.62532	6.61414	-7.62506	26.1643	52.3824
8.94976	-5.50032	6.66118	-7.50006	26.2085	52.5074
8.99883	-5.37532	6.70981	-7.37506	26.2532	52.6324
9.04914	-5.25032	6.75999	-7.25006	26.2984	52.7574
9.10067	-5.12532	6.81171	-7.12506	26.344	52.8824
9.15339	-5.00031	6.86493	-7.00006	26.3902	53.0074
9.2073	-4.87531	6.91963	-6.87506	26.437	53.1324
9.26238	-4.75031	6.97577	-6.75006	26.4844	53.2574
9.3186	-4.62531	7.03334	-6.62506	26.532	53.3824
9.37596	-4.50031	7.09229	-6.50006	26.58	53.5074
9.43443	-4.37531	7.15262	-6.37506	26.6288	53.6324
9.49399	-4.25031	7.21427	-6.25006	26.6776	53.7574
9.55463	-4.12531	7.27716	-6.12506	26.7271	53.8824
9.61633	-4.00031	7.34133	-6.00006	26.7771	54.0074
9.67948	-3.87529	7.40676	-5.87506	26.8276	54.1324
9.74281	-3.75026	7.47343	-5.75006	26.8786	54.2574
9.80774	-3.62526	7.54137	-5.62506	26.9299	54.3824
9.87367	-3.50026	7.61049	-5.50006	26.9816	54.5074
9.94056	-3.37526	7.68075	-5.37506	27.0338	54.6324
10.0084	-3.25026	7.75215	-5.25006	27.0864	54.7574
10.0772	-3.12526	7.82464	-5.12506	27.1398	54.8824
10.1468	-3.00026	7.8982	-5.00006	27.1933	55.0074
10.2172	-2.87526	7.97282	-4.87506	27.2473	55.1324
10.2885	-2.75026	8.04846	-4.75006	27.3019	55.2574
10.3609	-2.62526	8.12511	-4.62506	27.3568	55.3824
10.4341	-2.50026	8.20274	-4.50006	27.4123	55.5074
10.5082	-2.37526	8.28132	-4.37506	27.4681	55.6324
10.5831	-2.25026	8.36084	-4.25006	27.5242	55.7574
10.6589	-2.12526	8.44127	-4.12506	27.5807	55.8824
10.7354	-2.00026	8.52259	-4.00006	27.6377	56.0074
10.8126	-1.87526	8.60478	-3.87506	27.6951	56.1324
10.8906	-1.75026	8.68782	-3.75006	27.7529	56.2574
10.9693	-1.62526	8.77169	-3.62506	27.8111	56.3824
11.0488	-1.50026	8.85637	-3.50006	27.8697	56.5074
11.1289	-1.37526	8.94168	-3.37506	27.9292	56.6324
11.2098	-1.25026	9.02776	-3.25005	27.9883	56.7574
11.2914	-1.12526	9.11463	-3.12505	28.0483	56.8824
11.3737	-1.00026	9.20209	-3.00005	28.1087	57.0074
11.4566	-0.87523	9.29057	-2.87505	28.1694	57.1324
11.54	-0.7502	9.37975	-2.75005	28.2306	57.2574
11.6244	-0.62518	9.46962	-2.62505	28.2922	57.3824
11.7087	-0.50016	9.56015	-2.50005	28.3542	57.5074
11.7943	-0.37516	9.65133	-2.37505	28.4165	57.6324
11.8805	-0.25016	9.74315	-2.25005	28.4793	57.7574
11.871	-0.12508	9.83559	-2.12505	28.5424	57.8824
11.8429	0	9.92864	-2.00005	28.6058	58.0074
11.8133	0.125	10.0223	-1.87505	28.6696	58.1324
11.7848	0.25	10.1165	-1.75005	28.7337	58.2574
11.7573	0.375	10.2113	-1.62505	28.7983	58.3824
11.731	0.5	10.3066	-1.50005	28.8632	58.5074
11.7058	0.625	10.4025	-1.37505	28.9285	58.6324
11.6816	0.75	10.4988	-1.25005	28.9941	58.7574
11.6589	0.875	10.5955	-1.12505	29.0606	58.8824
11.6371	1.00001	10.6926	-1.00004	29.1268	59.0074
11.6164	1.12501	10.7905	-0.87504	29.1937	59.1324
11.5969	1.25001	10.8889	-0.75004	29.2609	59.2574
11.5784	1.37501	10.9877	-0.62504	29.3285	59.3824
11.5612	1.50001	11.0867	-0.50003	29.3964	59.5074
11.545	1.62501	11.1864	-0.37503	29.4647	59.6324
11.5299	1.75001	11.2865	-0.25003	29.5332	59.7574
11.5161	1.87501	11.3879	-0.12502	29.6021	59.8824
11.5034	2.00001	11.4877	0	29.6713	60.0074
11.4918	2.12501	11.5894	0.125	29.7412	60.1324
11.4815	2.25001	11.6914	0.25	29.811	60.2574
11.4723	2.37501	11.7756	0.37543	29.8814	60.3824
11.4642	2.50001	11.7679	0.50085	29.9521	60.5074
11.4574	2.62501	11.7599	0.62585	30.0231	60.6324
11.4517	2.75001	11.7527	0.75086	30.0944	60.7574
11.4473	2.87501	11.7467	0.87586	30.1659	60.8824
11.444	3.00001	11.7418	1.00086	30.2378	61.0074
11.4418	3.12501	11.738	1.12586	30.3101	61.1324
11.4409	3.25001	11.7355	1.25086	30.3826	61.2574
11.4412	3.37501	11.7341	1.37586	30.4555	61.3824
11.4426	3.50001	11.7339	1.50086	30.5287	61.5074
11.4459	3.62501	11.7348	1.62586	30.6024	61.6324
11.4495	3.75002	11.737	1.75086	30.6765	61.7574
11.4546	3.87502	11.7402	1.87586	30.7506	61.8824
11.4608	4.00002	11.7447	2.00086	30.8251	62.0074
11.4682	4.12502	11.7503	2.12586	30.8998	62.1324
11.4768	4.25002	11.7571	2.25086	30.9749	62.2574
11.4866	4.37502	11.765	2.37586	31.0502	62.3824
11.4976	4.50002	11.7741	2.50086	31.1259	62.5074
11.5097	4.62502	11.7844	2.62586	31.2019	62.6324
11.5229	4.75002	11.7958	2.75086	31.2782	62.7574
11.5374	4.87502	11.8088	2.87586	31.3547	62.8824
11.553	5.00002	11.8223	3.00086	31.4316	63.0074
11.5697	5.12502	11.8372	3.12586	31.5093	63.1324
11.5876	5.25002	11.8532	3.25086	31.5865	63.2574
11.6066	5.37502	11.8704	3.37586	31.6643	63.3824
11.6267	5.50002	11.8887	3.50086	31.7424	63.5074
11.648	5.62502	11.9081	3.62586	31.8208	63.6324
11.6704	5.75002	11.9287	3.75086	31.8995	63.7574
11.6939	5.87502	11.9504	3.87586	31.9785	63.8824
11.7185	6.00002	11.9732	4.00086	32.0578	64.0074
11.7443	6.12502	11.9971	4.12586	32.1373	64.1324
11.7711	6.25002	12.0221	4.25086	32.217	64.2574
11.7991	6.37502	12.0482	4.37586	32.297	64.3824
11.8281	6.50002	12.0753	4.50086	32.3772	64.5074
11.8583	6.62502	12.1036	4.62586	32.4577	64.6324
11.8895	6.75002	12.1328	4.75086	32.5385	64.7574
11.9218	6.87502	12.1632	4.87586	32.6195	64.8824
11.9551	7.00002	12.1946	5.00086	32.7008	65.0074
11.9895	7.12502	12.2271	5.12586	32.7824	65.1324
12.025	7.25002	12.2606	5.25086	32.8642	65.2574
12.0615	7.37502	12.2954	5.37586	32.9468	65.3824
12.099	7.50002	12.3311	5.50086	33.0288	65.5074
12.1376	7.62502	12.3677	5.62586	33.1115	65.6324
12.1771	7.75002	12.4054	5.75086	33.1944	65.7574
12.2177	7.87502	12.4441	5.87586	33.2778	65.8824
12.2593	8.00002	12.4837	6.00086	33.3612	66.0074
12.3018	8.12502	12.5244	6.12586	33.4447	66.1324
12.3454	8.25002	12.566	6.25086	33.5286	66.2574
12.3819	8.37503	12.6086	6.37586	33.6126	66.3824
12.3564	8.50005	12.6522	6.50086	33.6969	66.5074
12.3336	8.62505	12.6967	6.62586	33.7816	66.6324
12.3106	8.75006	12.7422	6.75086	33.8665	66.7574
12.2889	8.87506	12.7886	6.87586	33.9515	66.8824
12.2682	9.00006	12.8359	7.00086	34.0367	67.0074
12.249	9.12506	12.8841	7.12586	34.1224	67.1324
12.2306	9.25006	12.9333	7.25086	34.2084	67.2574
12.2132	9.37506	12.9834	7.37586	34.2943	67.3824
12.1969	9.50006	13.0343	7.50086	34.3805	67.5074
12.1817	9.62506	13.0862	7.62586	34.4669	67.6324
12.1677	9.75006	13.1389	7.75086	34.5535	67.7574
12.1547	9.87506	13.1926	7.87586	34.6406	67.8824
12.1427	10.0001	13.2471	8.00086	34.7275	68.0074
12.1319	10.1251	13.3023	8.12586	34.8149	68.1324
12.1222	10.2501	13.3583	8.25086	34.9025	68.2574
12.1136	10.3751	13.4153	8.37586	19.4251	5.12535
12.106	10.5001	13.473	8.50087	19.4267	5.25036
12.0996	10.6251	13.5316	8.62587	19.4293	5.37536
12.0943	10.7501	13.591	8.75087	19.4321	5.50036
12.0902	10.8751	13.6511	8.87587	19.4362	5.62545
12.0871	11.0001	13.7121	9.00087	19.4402	5.75053
12.0855	11.1251	13.7738	9.12587	19.4462	5.87554
12.0844	11.2501	13.8363	9.25087	19.4531	6.00054
12.0848	11.3751	13.8996	9.37587	19.4602	6.12554
12.0863	11.5001	13.9636	9.50087	19.4681	6.25054
12.089	11.6251	14.0282	9.62587	19.4762	6.37554
12.0927	11.7501	14.0936	9.75087	19.4847	6.50054
12.0976	11.8751	14.1597	9.87587	19.4171	6.62566
12.1036	12.0001	14.2264	10.0009	19.3496	6.75077
12.1107	12.1251	14.2939	10.1259	19.2838	6.87578
12.1189	12.2501	14.3621	10.2509	19.2185	7.00079
12.1282	12.3751	14.4313	10.3759	19.1528	7.12581
12.1387	12.5001	14.5011	10.5009	19.0874	7.25082
12.1502	12.6251	14.5713	10.6259	19.023	7.37583
12.1628	12.7501	14.6422	10.7509	18.9591	7.50083
12.1765	12.8751	14.7137	10.8759	18.8968	7.62597
12.1913	13.0001	14.7859	11.0009	18.835	7.75111
12.2072	13.1251	14.8587	11.1259	18.7734	7.87614
12.2241	13.2501	14.9321	11.2509	18.7116	8.00117
12.2422	13.3751	15.0061	11.3759	18.6512	8.12618
12.2614	13.5001	15.0807	11.5009	18.591	8.25118
12.2819	13.6251	15.1559	11.6259	18.5307	8.37618
12.3031	13.7501	15.2317	11.7509	18.4709	8.50118
12.3255	13.8751	15.3081	11.8759	18.4132	8.6262
12.349	14.0001	15.385	12.0009	18.3551	8.75122
12.3736	14.1251	15.4631	12.1259	18.298	8.87622
12.3992	14.2501	15.541	12.2509	18.2415	9.00123
12.4259	14.3751	15.6197	12.3759	18.1849	9.12625
12.4536	14.5001	15.699	12.5009	18.1286	9.25127
12.4824	14.6251	15.7788	12.6259	18.075	9.3765
12.5121	14.7501	15.8591	12.7509	18.0216	9.50173
12.5429	14.8751	15.9402	12.8759	17.9679	9.62675
12.5747	15.0001	16.0217	13.0009	17.9149	9.75177
12.6074	15.1251	16.1035	13.1259	17.8633	9.87677
12.6412	15.2501	16.1858	13.2509	17.8119	10.0018
12.676	15.3751	16.2686	13.3759	17.7605	10.1268
12.7117	15.5001	16.3518	13.5009	17.7097	10.2519
12.7484	15.6251	16.3481	13.6264	17.661	10.3769
12.7861	15.7501	16.2983	13.7518	17.6125	10.5019
12.8248	15.8751	16.2461	13.8768	17.5637	10.6269
12.8645	16.0001	16.1946	14.0018	17.5157	10.7519
12.9054	16.1251	16.1438	14.1268	17.4694	10.8769
12.9466	16.2501	16.0938	14.2518	17.4234	11.0019
12.9892	16.3751	16.0445	14.3768	17.3783	11.1269
13.0326	16.5001	15.9959	14.5018	17.3338	11.252
13.077	16.6251	15.9486	14.6268	17.2895	11.377
13.1221	16.7501	15.9017	14.7518	17.2455	11.502
13.1684	16.8751	15.8554	14.8768	17.2031	11.627
13.2156	17.0001	15.8099	15.0018	17.1615	11.752
13.2635	17.1251	15.7651	15.1268	17.1205	11.877
13.3122	17.2501	15.7211	15.2518	17.0802	12.002
13.3028	17.3751	15.6778	15.3768	17.0403	12.127
13.2805	17.5001	15.6354	15.5018	17.001	12.252
13.2587	17.6251	15.5937	15.6268	16.9632	12.3771
13.238	17.7501	15.5528	15.7518	16.9256	12.5021
13.2183	17.8751	15.5128	15.8768	16.8892	12.6271
13.1997	18.0001	15.4735	16.0019	16.8533	12.7521
13.182	18.1251	15.4351	16.1269	16.818	12.8771
13.1653	18.2501	15.3974	16.2519	16.7832	13.0021
13.1497	18.3751	15.3606	16.3769	16.7498	13.1271
13.1351	18.5001	15.3247	16.5019	16.7172	13.2522
13.1215	18.6251	15.2895	16.6269	16.6851	13.3772
13.109	18.7501	15.2552	16.7519	16.6537	13.5022
13.0975	18.8751	15.2218	16.8769	16.623	13.6272
13.087	19.0001	15.1892	17.0019	16.5921	13.7523
13.0776	19.1251	15.1575	17.1269	16.5644	13.8773
13.0692	19.2501	15.1266	17.2519	16.5373	14.0023
13.0618	19.3751	15.0966	17.3769	16.5099	14.1273
13.0555	19.5001	15.0674	17.5019	16.4832	14.2523
13.0502	19.6251	15.0392	17.6269	16.4572	14.3773
13.0459	19.7501	15.0118	17.7519	16.4314	14.5023
13.0429	19.8751	14.9853	17.8769	16.4084	14.6273
13.0408	20.0001	14.9596	18.0019	16.3854	14.7524
13.0398	20.1251	14.9349	18.1269	16.3636	14.8774
13.0397	20.2501	14.9111	18.2519	16.3419	15.0024
13.0408	20.3751	14.8882	18.3769	16.321	15.1274
13.0429	20.5001	14.8661	18.5019	16.3009	15.2524
13.0459	20.6251	14.845	18.6269	16.2821	15.3774
13.0501	20.7501	14.8248	18.7519	16.2643	15.5024
13.0553	20.8751	14.8057	18.8769	16.2466	15.6274
13.0616	21.0001	14.7874	19.0019	16.2298	15.7524
13.0689	21.1251	14.77	19.1269	16.215	15.8775
13.0772	21.2501	14.7535	19.2519	16.1993	16.0025
13.0866	21.3751	14.7379	19.3769	16.1861	16.1275
13.097	21.5001	14.7232	19.5019	16.1725	16.2525
13.1084	21.6251	14.7095	19.6269	16.1608	16.3775
13.1209	21.7501	14.6966	19.7519	16.1501	16.5025
13.1344	21.8751	14.6847	19.8769	16.1388	16.6275
13.1489	22.0001	14.6738	20.0019	16.1283	16.7525
13.1651	22.1251	14.6638	20.1269	16.1202	16.8776
13.1814	22.2501	14.6547	20.2519	16.113	17.0026
13.1991	22.3751	14.6466	20.3769	16.1059	17.1276
13.2178	22.5001	14.6395	20.5019	16.0992	17.2526
13.2375	22.6251	14.6333	20.6269	16.094	17.3776
13.2583	22.7501	14.628	20.7519	16.0897	17.5026
13.2802	22.8751	14.6236	20.8769	16.0862	17.6278
13.3028	23.0001	14.6203	21.0019	16.0827	17.7529
13.3264	23.1251	14.6178	21.1269	16.0814	17.878
13.3511	23.2501	14.6163	21.2519	16.081	18.003
13.3767	23.3751	14.6158	21.3769	16.0814	18.128
13.4033	23.5001	14.6162	21.5019	16.0816	18.2531
13.4309	23.6251	14.6175	21.6269	16.084	18.3781
13.4596	23.7501	14.6198	21.7519	16.0867	18.5031
13.4891	23.8751	14.623	21.8769	16.0899	18.6281
13.5196	24.0001	14.6272	22.0019	16.0941	18.7531
13.551	24.1251	14.6324	22.1269	16.1	18.8781
13.5834	24.2501	14.6385	22.2519	16.1053	19.0032
13.6167	24.3751	14.6455	22.3769	16.1128	19.1282
13.6509	24.5001	14.6535	22.5019	16.1209	19.2532
13.6861	24.6251	14.6624	22.6269	16.1295	19.3782
13.7222	24.7501	14.6722	22.7519	16.1389	19.5032
13.7592	24.8751	14.683	22.8769	16.1488	19.6282
13.7972	25.0001	14.6948	23.0019	16.1594	19.7532
13.836	25.1251	14.7074	23.1269	16.1717	19.8782
13.8758	25.2501	14.721	23.2519	16.1848	20.0032
13.9168	25.3751	14.7356	23.3769	16.1989	20.1282
13.958	25.5001	14.751	23.5019	16.2138	20.2532
14.0005	25.6251	14.7674	23.6269	16.2298	20.3782
14.0438	25.7501	14.7848	23.7519	16.2455	20.5032
14.0882	25.8751	14.803	23.8769	16.2634	20.6282
14.133	26.0001	14.8221	24.0019	16.2805	20.7532
14.1791	26.1251	14.8422	24.1269	16.2999	20.8783
14.2259	26.2501	14.8632	24.2519	16.3197	21.0033
14.2734	26.3751	14.885	24.3769	16.3404	21.1283
14.3217	26.5001	14.9078	24.5019	16.3614	21.2534
14.3709	26.6251	14.9315	24.6269	16.3841	21.3784
14.4207	26.7501	14.9561	24.7519	16.4065	21.5035
14.4715	26.8751	14.9816	24.8769	16.4312	21.6285
14.5231	27.0001	15.0079	25.0019	16.4558	21.7535
14.5754	27.1251	15.0352	25.1269	16.4804	21.8785
14.6285	27.2501	15.0633	25.2519	16.5058	22.0035
14.6824	27.3751	15.0923	25.3769	16.5338	22.1285
14.7371	27.5001	15.1222	25.5019	16.5626	22.2536
14.7926	27.6251	15.1529	25.6269	16.5916	22.3786
14.8487	27.7501	15.1845	25.7519	16.6214	22.5037
14.9057	27.8751	15.217	25.8769	16.6519	22.6287
14.9633	28.0001	15.2503	26.0019	16.6832	22.7537
15.0217	28.1251	15.2845	26.1269	16.7153	22.8787
15.0809	28.2501	15.3195	26.2519	16.7481	23.0037
15.1409	28.3751	15.3553	26.3769	16.7811	23.1287
15.2012	28.5001	15.392	26.5019	16.8148	23.2537
15.2625	28.6251	15.4295	26.6269	16.8503	23.3788
15.3245	28.7501	15.4678	26.7519	16.8866	23.5038
15.3872	28.8751	15.5069	26.8769	16.9223	23.6288
15.4505	29.0001	15.5469	27.0019	16.9587	23.7538
15.5145	29.1251	15.5876	27.1269	16.9913	23.8789
15.579	29.2501	15.6291	27.2519	17.0225	24.004
15.6443	29.3751	15.6715	27.3769	17.0469	24.13
15.7101	29.5001	15.7146	27.5019	17.0721	24.256
15.7767	29.6251	15.7585	27.6269	17.0877	24.381
15.8438	29.7501	15.8032	27.7519	17.1036	24.506
15.9116	29.8751	15.8487	27.8769	17.1205	24.631
15.98	30.0001	15.8949	28.0019	17.1381	24.756
16.049	30.1251	15.9419	28.1269	17.1575	24.881
16.1186	30.2501	15.9896	28.2519	17.1772	25.006
16.1888	30.3751	16.0381	28.3769	17.1975	25.131
16.2597	30.5001	16.0873	28.5019	17.2181	25.256
16.3311	30.6251	16.1372	28.6269	17.2401	25.3811
16.403	30.7501	16.1879	28.7519	17.2618	25.5062
16.4759	30.8751	16.2393	28.8769	17.2856	25.6312
16.5492	31.0001	16.2914	29.0019	17.3101	25.7562
16.6229	31.1251	16.3442	29.1269	17.3357	25.8812
16.6971	31.2501	16.3978	29.2519	17.362	26.0062
16.7718	31.3751	16.452	29.3769	17.3882	26.1312
16.8471	31.5001	16.5069	29.5019	17.4152	26.2562
16.9229	31.6251	16.5629	29.6269	17.4443	26.3813
16.9992	31.7501	16.6189	29.7519	17.4729	26.5063
17.0764	31.8751	16.6758	29.8769	17.5028	26.6313
17.1536	32.0001	16.7335	30.0019	17.5334	26.7563
17.2111	32.1251	16.7918	30.1269	17.5644	26.8813
17.198	32.2502	16.8507	30.2519	17.5959	27.0063
17.1876	32.3752	16.9104	30.3769	17.6289	27.1313
17.1771	32.5002	16.9707	30.5019	17.6624	27.2563
17.1672	32.6252	17.0315	30.6269	17.6965	27.3813
17.1581	32.7502	17.093	30.7519	17.731	27.5063
17.1499	32.8752	17.1551	30.8769	17.7674	27.6313
17.1425	33.0002	17.2179	31.0019	17.8035	27.7563
17.1359	33.1252	17.2812	31.1269	17.8413	27.8813
17.1301	33.2502	17.3452	31.2519	17.8788	28.0063
17.1252	33.3752	17.4097	31.3769	17.9176	28.1313
17.1211	33.5002	17.4749	31.5019	17.9572	28.2563
17.1178	33.6252	17.5406	31.6269	17.9968	28.3814
17.1154	33.7502	17.607	31.7519	18.037	28.5065
17.1138	33.8752	17.6738	31.8769	18.0793	28.6315
17.113	34.0002	17.7413	32.0019	18.1221	28.7565
17.1131	34.1252	17.8093	32.1269	18.1644	28.8815
17.114	34.2502	17.8779	32.2519	18.2071	29.0065
17.1157	34.3752	17.947	32.3769	18.2505	29.1315
17.1183	34.5002	18.0167	32.5019	18.2946	29.2565
17.1217	34.6252	18.0869	32.6269	18.3419	29.3816
17.1259	34.7502	18.1576	32.7519	18.389	29.5067
17.131	34.8752	18.2289	32.8769	18.436	29.6317
17.1369	35.0002	18.3007	33.0019	18.4832	29.7567
17.1436	35.1252	18.373	33.1269	18.5309	29.8818
17.1511	35.2502	18.4458	33.2519	18.5788	30.007
17.1596	35.3752	18.5191	33.3769	18.6289	30.1321
17.1689	35.5002	18.593	33.5019	18.6794	30.2572
17.1792	35.6252	18.6673	33.6269	18.7303	30.3822
17.1904	35.7502	18.7421	33.7519	18.7819	30.5072
17.202	35.8752	18.8174	33.8769	18.834	30.6323
17.2145	36.0002	18.8932	34.0019	18.8859	30.7574
17.2279	36.1252	18.9695	34.1269	18.9397	30.8825
17.242	36.2502	19.0462	34.2519	18.9941	31.0075
17.257	36.3752	19.1234	34.3769	19.0488	31.1325
17.2729	36.5002	19.201	34.5019	19.1031	31.2576
17.2894	36.6252	19.2791	34.6269	19.159	31.3826
17.3068	36.7502	19.3577	34.7519	19.2152	31.5076
17.325	36.8752	19.4367	34.8769	19.2713	31.6326
17.344	37.0002	19.5161	35.0019	19.3281	31.7576
17.3638	37.1252	19.596	35.1269	19.3873	31.8826
17.3844	37.2502	19.6763	35.2519	19.4469	32.0076
17.4058	37.3752	19.757	35.3769	19.5061	32.1326
17.4279	37.5002	19.8381	35.5019	19.5659	32.2577
17.4508	37.6252	19.9197	35.6269	19.6266	32.3827
17.4746	37.7502	20.0017	35.7519	19.687	32.5077
17.4991	37.8752	20.0841	35.8769	19.7478	32.6327
17.5243	38.0002	20.1668	36.0019	19.8091	32.7577
17.5504	38.1252	20.25	36.1269	19.8721	32.8828
17.5772	38.2502	20.3336	36.2519	19.9349	33.0079
17.6048	38.3752	20.4175	36.3769	19.9998	33.1329
17.6332	38.5002	20.5019	36.5019	20.0642	33.2579
17.6624	38.6252	20.5867	36.6269	20.1292	33.3829
17.6923	38.7502	20.6718	36.7519	20.194	33.5079
17.723	38.8752	20.7572	36.8769	20.2601	33.633
17.7545	39.0002	20.8431	37.0019	20.3251	33.758
17.7867	39.1252	20.9293	37.1269	20.3894	33.883
17.8196	39.2502	21.0159	37.2519	20.4323	34.008
17.8533	39.3752	21.1028	37.3769	20.4755	34.133
17.8879	39.5002	21.19	37.5019	20.5193	34.258
17.923	39.6252	21.2776	37.6269	20.5634	34.383
17.9589	39.7502	21.3656	37.7519	20.6077	34.508
17.9955	39.8752	21.4539	37.8769	20.6534	34.6331
18.0329	40.0002	21.5425	38.0019	20.6998	34.7581
18.0709	40.1252	21.6271	38.1272	20.747	34.8831
18.1097	40.2502	21.6891	38.2525	20.7937	35.0082
18.1492	40.3752	21.7214	38.3776	20.8419	35.1332
18.1894	40.5002	21.7543	38.5026	20.8907	35.2582
18.2304	40.6252	21.7868	38.6276	20.9401	35.3832
18.272	40.7502	21.82	38.7526	20.9895	35.5082
18.3143	40.8752	21.8537	38.8776	21.0391	35.6332
18.3573	41.0002	21.8881	39.0026	21.0893	35.7582
18.401	41.1252	21.923	39.1276	21.1414	35.8832
18.4453	41.2502	21.9586	39.2526	21.1935	36.0082
18.4904	41.3752	21.9948	39.3776	21.246	36.1332
18.5361	41.5002	22.0316	39.5026	21.2984	36.2582
18.5825	41.6252	22.0689	39.6276	21.3526	36.3832
18.6295	41.7502	22.1069	39.7526	21.4066	36.5083
18.6775	41.8752	22.1457	39.8777	21.4621	36.6333
18.7257	42.0002	22.1849	40.0027	21.5168	36.7583
18.7748	42.1252	22.2247	40.1277	21.5727	36.8834
18.8245	42.2502	22.2649	40.2527	21.6285	37.0084
18.8749	42.3752	22.2746	40.3777	21.6856	37.1334
18.9259	42.5002	22.2849	40.5027	21.7427	37.2584
18.9775	42.6252	22.2947	40.6277	21.8009	37.3835
19.0297	42.7502	22.3051	40.7528	21.8597	37.5085
19.0825	42.8752	22.3153	40.8778	21.9187	37.6335
19.136	43.0002	22.3261	41.0028	21.9776	37.7585
19.19	43.1252	22.3376	41.1278	22.0381	37.8835
19.2446	43.2502	22.3498	41.2528	22.0981	38.0085
19.2999	43.3752	22.3625	41.3778	22.1593	38.1335
19.3558	43.5002	22.3759	41.5028	22.2211	38.2585
19.4122	43.6252	22.3899	41.6278	22.2828	38.3835
19.4692	43.7502	22.4046	41.7528	22.3446	38.5085
19.5268	43.8752	22.4199	41.8778	22.4075	38.6335
19.585	44.0002	22.4358	42.0028	22.4709	38.7585
19.6438	44.1252	22.4524	42.1278	22.5354	38.8835
19.7032	44.2502	22.4696	42.2528	22.5991	39.0086
19.7631	44.3752	22.4874	42.3778	22.6642	39.1336
19.8235	44.5002	22.5059	42.5028	22.7293	39.2586
19.8846	44.6252	22.525	42.6278	22.7945	39.3836
19.9461	44.7502	22.5447	42.7528	22.8601	39.5086
20.0082	44.8752	22.565	42.8778	22.9273	39.6336
20.0709	45.0002	22.586	43.0028	22.995	39.7586
20.1343	45.1252	22.6076	43.1278	23.0625	39.8836
20.1979	45.2502	22.6298	43.2528	23.1303	40.0086
20.2622	45.3752	22.6527	43.3778	23.1986	40.1336
20.327	45.5002	22.6761	43.5028	23.267	40.2587
20.3923	45.6252	22.7003	43.6278	23.337	40.3837
20.4581	45.7502	22.725	43.7528	23.4071	40.5088
20.5245	45.8752	22.7503	43.8778	23.4767	40.6338
20.5913	46.0002	22.7762	44.0028	23.5467	40.7588
20.6586	46.1252	22.8027	44.1278	23.6171	40.8838
20.7265	46.2502	22.8299	44.2528	23.688	41.0088
20.7953	46.3752	22.8576	44.3778	23.7613	41.1338
20.8638	46.5002	22.886	44.5028	23.8338	41.2589
20.9331	46.6252	22.9149	44.6278	23.9069	41.3839
21.0029	46.7502	22.9444	44.7528	23.9794	41.5089
21.0731	46.8752	22.9746	44.8778	24.0532	41.6339
21.1439	47.0002	23.0053	45.0028	24.1266	41.7589
21.2152	47.1252	23.0366	45.1278	24.2011	41.8839
21.2868	47.2502	23.0685	45.2528	24.2752	42.0089
21.359	47.3752	23.101	45.3778	24.3506	42.1339
21.4316	47.5002	23.1341	45.5028	24.4252	42.2589
21.5047	47.6252	23.1678	45.6278	24.5015	42.3839
21.5781	47.7502	23.202	45.7528	24.5779	42.5089
21.6521	47.8752	23.2368	45.8778	24.6542	42.6339
21.7264	48.0002	23.2722	46.0028	24.7308	42.7589
21.8011	48.1252	23.3082	46.1278	24.8079	42.884
21.8763	48.2502	23.3448	46.2528	24.8853	43.009
21.9518	48.3752	23.3819	46.3778	24.9635	43.134
22.0278	48.5002	23.4196	46.5028	25.042	43.259
22.1043	48.6252	23.4578	46.6278	25.1201	43.384
22.1811	48.7502	23.4966	46.7528	25.1986	43.509
22.2583	48.8752	23.536	46.8778	25.2784	43.634
22.3359	49.0002	23.5759	47.0028	25.3583	43.759
22.414	49.1252	23.6164	47.1278	25.3793	43.8841
22.4924	49.2502	23.6574	47.2528	25.3866	44.0092
22.5612	49.3753	23.699	47.3778	25.3931	44.1342
22.616	49.5003	23.7411	47.5028	25.4002	44.2592
22.6709	49.6253	23.7838	47.6278	25.4071	44.3842
22.7263	49.7503	23.827	47.7528	25.4145	44.5092
22.7823	49.8753	23.8425	47.8778	25.422	44.6342
22.8387	50.0003	23.8511	48.0028	25.4301	44.7592
22.896	50.1254	23.8603	48.1278	25.4396	44.8842
22.9535	50.2504	23.87	48.2528	25.4493	45.0093
23.0115	50.3754	23.8804	48.3778	25.46	45.1343
23.07	50.5004	23.8914	48.5028	25.4707	45.2593
23.1289	50.6254	23.9033	48.6278	25.4823	45.3843
23.1883	50.7504	23.9158	48.7528	25.4942	45.5093
23.2482	50.8754	23.9286	48.8778	25.5062	45.6343
23.3086	51.0004	23.942	49.0028	25.5187	45.7593
23.3694	51.1254	23.956	49.1278	25.5327	45.8843
23.4307	51.2504	23.9705	49.2528	25.5473	46.0093
23.4925	51.3754	23.9857	49.3778	25.5614	46.1343
23.5547	51.5004	24.0015	49.5028	25.5761	46.2593
23.6175	51.6254	24.0179	49.6278	25.5927	46.3844
23.6806	51.7504	24.0348	49.7528	25.6099	46.5094
23.7443	51.8754	24.0524	49.8778	25.6266	46.6344
23.8083	52.0004	24.0705	50.0028	25.6439	46.7594
23.8728	52.1254	24.0892	50.1278	25.6624	46.8844
23.9378	52.2504	24.1086	50.2528	25.6808	47.0094
24.0032	52.3754	24.1287	50.3778	25.7004	47.1344
24.0691	52.5004	24.1491	50.5028	25.7201	47.2594
24.1353	52.6254	24.1702	50.6278	25.7403	47.3844
24.2021	52.7504	24.1919	50.7528	25.7608	47.5094
24.2692	52.8754	24.2142	50.8778	25.7825	47.6344
24.3368	53.0004	24.237	51.0028	25.8048	47.7594
24.4051	53.1254	24.2605	51.1278	25.8271	47.8845
24.4737	53.2504	24.2845	51.2528	25.8496	48.0095
24.5425	53.3754	24.3091	51.3778	25.8734	48.1345
24.6117	53.5004	24.3342	51.5028	25.8976	48.2595
24.6814	53.6254	24.36	51.6278	25.9224	48.3845
24.7514	53.7504	24.3863	51.7528	25.9478	48.5095
24.8172	53.8754	24.4131	51.8778	25.9739	48.6345
24.8238	54.0005	24.4406	52.0028	26.0001	48.7595
24.8291	54.1255	24.4686	52.1278	26.0273	48.8845
24.835	54.2505	24.4971	52.2528	26.0544	49.0095
24.8414	54.3755	24.5262	52.3778	26.0817	49.1345
24.8485	54.5005	24.5558	52.5028	26.1096	49.2595
24.8561	54.6255	24.5861	52.6278	26.1392	49.3845
24.8643	54.7505	24.6168	52.7528	26.1693	49.5095
24.8731	54.8755	24.6482	52.8778	26.1992	49.6346
24.8825	55.0005	24.68	53.0028	26.2297	49.7596
24.8925	55.1255	24.7125	53.1278	26.2611	49.8846
24.903	55.2505	24.7454	53.2528	26.2931	50.0096
24.9141	55.3755	24.779	53.3778	26.3252	50.1346
24.9259	55.5005	24.813	53.5028	26.3573	50.2596
24.9381	55.6255	24.8476	53.6278	26.3905	50.3847
24.951	55.7505	24.8828	53.7528	26.423	50.5097
24.9644	55.8755	24.9184	53.8778	26.458	50.6347
24.9784	56.0005	24.9547	54.0028	26.4935	50.7597
24.9929	56.1255	24.9914	54.1278	26.5286	50.8848
25.008	56.2505	25.0287	54.2528	26.5643	51.0098
25.0237	56.3755	25.0665	54.3778	26.6008	51.1348
25.0399	56.5005	25.1048	54.5028	26.6379	51.2598
25.0567	56.6255	25.1437	54.6278	26.6749	51.3848
25.0741	56.7505	25.1831	54.7528	26.7121	51.5098
25.0921	56.8755	25.223	54.8778	26.7498	51.6348
25.1106	57.0005	25.2634	55.0028	26.7879	51.7598
25.1297	57.1255	25.3043	55.1278	26.828	51.8848
25.1493	57.2505	25.3458	55.2528	26.8682	52.0098
25.1695	57.3755	25.3877	55.3778	26.9084	52.1348
25.1903	57.5005	25.4302	55.5028	26.9492	52.2599
25.2116	57.6255	25.4732	55.6278	26.9907	52.3849
25.2335	57.7505	25.5166	55.7528	27.0326	52.5099
25.2561	57.8755	25.5606	55.8778	27.0747	52.6349
25.2792	58.0005	25.6051	56.0028	27.1172	52.7599
25.3028	58.1255	25.6501	56.1278	27.1598	52.8849
25.327	58.2505	25.6955	56.2528	27.2028	53.0099
25.3516	58.3755	25.7415	56.3778	27.247	53.1349
25.3768	58.5005	25.7879	56.5028	27.2916	53.2599
25.4026	58.6255	25.8349	56.6278	27.3363	53.3849
25.4289	58.7505	25.8823	56.7528	27.3815	53.51
25.4557	58.8755	25.9302	56.8778	27.4283	53.6351
25.4831	59.0005	25.9786	57.0028	27.4757	53.7602
25.511	59.1255	26.0274	57.1278	27.5225	53.8853
25.5395	59.2505	26.0767	57.2528	27.569	54.0103
25.5685	59.3755	26.1265	57.3778	27.617	54.1354
25.5981	59.5005	26.1768	57.5028	27.6656	54.2604
25.6282	59.6255	26.2275	57.6278	27.7146	54.3855
25.6588	59.7505	26.2787	57.7528	27.7637	54.5105
25.6899	59.8755	26.3304	57.8778	27.8136	54.6355
25.7216	60.0005	26.3825	58.0028	27.8636	54.7605
25.7538	60.1255	26.4352	58.1278	27.9142	54.8855
25.7866	60.2505	26.4882	58.2528	27.9648	55.0105
25.8199	60.3755	26.5417	58.3778	28.0164	55.1355
25.8538	60.5005	26.5956	58.5028	28.0676	55.2605
25.8883	60.6255	26.65	58.6278	28.1201	55.3856
25.9233	60.7505	26.7048	58.7528	28.172	55.5107
25.9587	60.8755	26.7601	58.8778	28.2257	55.6357
25.9946	61.0005	26.8158	59.0028	28.2793	55.7607
26.031	61.1255	26.8719	59.1278	28.3333	55.8857
26.0678	61.2505	26.9285	59.2528	28.3877	56.0107
26.1053	61.3755	26.9855	59.3778	28.4424	56.1357
26.1432	61.5005	27.0429	59.5028	28.4972	56.2607
26.1816	61.6255	27.1008	59.6278	28.5531	56.3857
26.2205	61.7505	27.1591	59.7528	28.609	56.5108
26.26	61.8755	27.2178	59.8778	28.6655	56.6358
26.2999	62.0005	27.2769	60.0028	28.7224	56.7608
26.3403	62.1255	27.3364	60.1278	28.7795	56.8858
26.3813	62.2505	27.3964	60.2528	28.837	57.0108
26.4227	62.3755	27.4567	60.3778	28.8958	57.1358
26.4646	62.5005	27.5175	60.5028	28.9541	57.2608
26.507	62.6255	27.5787	60.6278	29.0133	57.3858
26.5499	62.7505	27.6402	60.7528	29.0722	57.5108
26.5932	62.8755	27.7022	60.8778	29.1322	57.6358
26.6371	63.0005	27.7646	61.0028	29.1917	57.7609
26.6814	63.1255	27.8274	61.1278	29.2522	57.8859
26.7262	63.2505	27.8905	61.2528	29.3131	58.0109
26.7715	63.3755	27.9541	61.3778	29.3743	58.1359
26.8173	63.5005	28.018	61.5028	29.4354	58.2609
26.8635	63.6255	28.0823	61.6278	29.498	58.3859
26.9102	63.7505	28.147	61.7528	29.5595	58.5109
26.9574	63.8755	28.2121	61.8778	29.6225	58.6359
27.005	64.0005	28.2776	62.0028	29.6858	58.7609
27.0531	64.1255	28.3435	62.1278	29.7495	58.8859
27.1016	64.2505	28.4097	62.2528	29.8136	59.0109
27.1506	64.3755	28.4763	62.3778	29.8776	59.136
27.2001	64.5005	28.5432	62.5028	29.942	59.261
27.25	64.6255	28.6105	62.6278	30.0071	59.386
27.3004	64.7505	28.6782	62.7528	30.0723	59.511
27.3512	64.8755	28.7462	62.8778	30.1376	59.636
27.4025	65.0005	28.8147	63.0028	30.2029	59.7611
27.4542	65.1255	28.8834	63.1278	30.2694	59.8861
27.5063	65.2505	28.9525	63.2528	30.3362	60.0111
27.5591	65.3755	29.022	63.3778	30.4032	60.1361
27.6122	65.5005	29.0918	63.5028	30.4707	60.2611
27.6657	65.6255	29.1619	63.6278	30.5384	60.3861
27.7196	65.7505	29.2324	63.7528	30.6065	60.5111
27.7739	65.8755	29.3033	63.8778	30.6744	60.6361
27.8287	66.0005	29.3745	64.0028	30.7426	60.7611
27.8839	66.1255	29.446	64.1278	30.8128	60.8861
27.9395	66.2505	29.5178	64.2528	30.8822	61.0111
27.9955	66.3755	29.59	64.3778	30.952	61.1361
28.0519	66.5005	29.6625	64.5028	31.0221	61.2611
28.1087	66.6255	29.7354	64.6278	31.0926	61.3861
28.166	66.7505	29.8086	64.7528	31.1628	61.5111
28.2237	66.8755	29.882	64.8778	31.2343	61.6362
28.2818	67.0005	29.9559	65.0028	31.3047	61.7612
28.3403	67.1255	30.03	65.1278	31.3767	61.8862
28.3991	67.2505	30.1045	65.2528	31.4489	62.0112
28.4584	67.3755	30.1792	65.3778	31.5211	62.1362
28.5181	67.5005	30.2543	65.5028	31.5932	62.2612
28.5782	67.6255	30.3297	65.6278	31.6666	62.3862
28.6387	67.7505	30.4054	65.7528	31.74	62.5112
28.6995	67.8755	30.4814	65.8778	31.8135	62.6363
28.7608	68.0005	30.5577	66.0028	31.8869	62.7613
28.8224	68.1255	30.6343	66.1278	31.9611	62.8863
28.8845	68.2505	30.7112	66.2528	32.0356	63.0113
28.9469	68.3755	30.7884	66.3778	32.111	63.1363
29.0097	68.5005	30.8659	66.5028	32.1861	63.2613
29.0728	68.6255	30.9437	66.6278	32.2615	63.3864
29.1364	68.7505	31.0218	66.7528	32.337	63.5114
29.2003	68.8755	31.1002	66.8778	32.4128	63.6364
29.2646	69.0005	31.1789	67.0028	32.4885	63.7614
29.3292	69.1255	31.2578	67.1278	32.5657	63.8864
29.3943	69.2505	31.337	67.2528	32.6421	64.0114
29.4597	69.3755	31.4166	67.3778	32.7193	64.1364
29.5254	69.5005	31.4963	67.5028	32.7968	64.2614
29.5915	69.6255	31.5764	67.6278	32.8742	64.3864
29.658	69.7505	31.6568	67.7528	32.9516	64.5114
29.7248	69.8755	31.7374	67.8778	33.0304	64.6364
29.792	70.0005	31.8183	68.0028	33.1083	64.7615
29.8596	70.1255	31.8994	68.1278	33.1872	64.8865
29.9276	70.2505	31.9808	68.2528	33.2664	65.0115
29.9958	70.3755	32.0625	68.3778	33.3456	65.1365
30.0643	70.5005	32.1445	68.5028	33.4249	65.2615
30.1332	70.6255	32.2267	68.6278	33.5042	65.3865
30.2025	70.7505	32.3092	68.7528	33.5837	65.5116
30.2721	70.8755	32.3919	68.8778	33.6649	65.6367
30.342	71.0005	32.4749	69.0028	33.7449	65.7617
30.4122	71.1255	32.5583	69.1278	33.8255	65.8868
30.4828	71.2505	32.6418	69.2528	33.906	66.0118
30.5537	71.3755	32.7255	69.3778	33.9876	66.1368
30.6249	71.5005	32.8095	69.5028	34.0694	66.2618
30.6965	71.6255	32.8938	69.6278	34.1514	66.3868
30.7684	71.7505	32.9782	69.7528	34.2337	66.5118
30.8406	71.8755	33.063	69.8778	34.3163	66.6368
30.9131	72.0005	33.1479	70.0028	34.3991	66.7618
30.9859	72.1255	33.2332	70.1278	34.4816	66.8868
31.059	72.2505	33.3186	70.2528	34.5644	67.0118
31.1325	72.3755	33.4043	70.3778	34.6479	67.1368
31.2063	72.5005	33.4902	70.5028	34.7315	67.2618
31.2803	72.6255	33.5764	70.6278	34.8154	67.3869
31.3547	72.7505	33.6627	70.7528	34.8995	67.5119
31.4294	72.8755	33.7495	70.8778	34.9833	67.6369
31.5044	73.0005	33.8364	71.0028	35.0674	67.7619
31.5796	73.1255	33.9235	71.1278	35.1528	67.8869
31.6552	73.2505	34.0108	71.2528	35.2365	68.012
31.7311	73.3755	34.0983	71.3778	35.3223	68.137
31.8072	73.5005	34.186	71.5028	35.4083	68.262
31.8837	73.6255	34.274	71.6278	35.4936	68.387
31.9604	73.7505	34.3621	71.7528	35.5792	68.512
32.0375	73.8755	34.4505	71.8778	35.6654	68.637
32.1148	74.0005	34.5391	72.0028	35.7512	68.762
32.1924	74.1255	34.6279	72.1278	35.8375	68.887
32.2703	74.2505	34.717	72.2528	35.9241	69.012
32.3484	74.3755	34.8062	72.3778	36.0113	69.1371
32.4269	74.5005	34.8956	72.5028	36.0988	69.2621
32.5056	74.6255	34.9853	72.6278	36.1858	69.3871
32.5846	74.7505	35.0751	72.7528	36.273	69.5121
32.6571	74.8755	35.1576	72.8778	36.3609	69.6371
32.7293	75.0005	35.2403	73.0028	36.4485	69.7621
32.802	75.1256	35.3241	73.1278	36.5373	69.8873
32.8743	75.2507	35.4073	73.2528	36.6256	70.0125
32.9473	75.3757	35.4909	73.3778	36.7142	70.1375
33.0206	75.5007	35.5744	73.5028	36.803	70.2625
33.0945	75.6257	35.6583	73.6278	36.8924	70.3875
33.1684	75.7507	35.7424	73.7528	36.9816	70.5125
33.2426	75.8757	35.8267	73.8778	37.071	70.6375
33.317	76.0007	35.9112	74.0028	37.1605	70.7625
33.3918	76.1257	35.996	74.1278	37.2504	70.8875
33.4667	76.2507	36.081	74.2528	37.3402	71.0125
33.5421	76.3757	36.1662	74.3778	37.4304	71.1375
33.6176	76.5007	36.2517	74.5028	37.5204	71.2625
33.6935	76.6257	36.3375	74.6278	37.6113	71.3875
33.7696	76.7507	36.4234	74.7528	37.7015	71.5125
33.846	76.8757	36.5095	74.8778	37.7925	71.6375
33.9227	77.0007	36.5959	75.0028	37.8836	71.7625
34	77.1257	36.6824	75.1278	37.975	71.8876
34.0774	77.2507	36.7691	75.2528	38.0661	72.0126
34.1548	77.3757	36.8561	75.3778	38.1578	72.1376
34.2326	77.5007	36.9432	75.5028	38.2492	72.2626
34.3106	77.6257	37.0306	75.6278	38.3418	72.3876
34.3889	77.7507	37.1182	75.7528	38.4339	72.5126
34.4675	77.8757	37.2059	75.8778	38.5262	72.6376
34.5463	78.0007	37.2939	76.0028	38.6187	72.7626
34.6253	78.1257	37.3821	76.1278	38.7116	72.8876
34.7047	78.2507	37.4705	76.2528	38.8047	73.0126
34.7845	78.3757	37.559	76.3778	38.8977	73.1377
34.8643	78.5007	37.6478	76.5028	38.9906	73.2627
34.9444	78.6257	37.7368	76.6278	39.0841	73.3877
35.0248	78.7507	37.8259	76.7528	39.1777	73.5127
35.1054	78.8757	37.9153	76.8778	39.2714	73.6377
35.1863	79.0007	38.0049	77.0028	39.3651	73.7627
35.2674	79.1257	38.0946	77.1278	39.4587	73.8877
35.3487	79.2507	38.1845	77.2528	39.5525	74.0127
35.4303	79.3757	38.2747	77.3778	39.6473	74.1377
35.5121	79.5007	38.365	77.5028	39.7422	74.2627
35.5942	79.6257	38.4555	77.6278	39.8368	74.3877
35.6765	79.7507	38.5461	77.7528	39.9316	74.5127
35.759	79.8757	38.637	77.8778	40.0269	74.6378
35.8418	80.0007	38.7281	78.0028	40.1218	74.7628
35.9248	80.1257	38.8193	78.1278	40.2174	74.8878
36.008	80.2507	38.9107	78.2528	40.3127	75.0128
36.0915	80.3757	39.0023	78.3778	40.4085	75.1378
36.1752	80.5007	39.0941	78.5028	40.504	75.2629
36.2591	80.6257	39.186	78.6278	40.6004	75.3879
36.3433	80.7507	39.2781	78.7528	40.6965	75.5129
36.4277	80.8757	39.3704	78.8778	40.7929	75.6379
36.5123	81.0007	39.4629	79.0028	40.8895	75.7629
36.5971	81.1257	39.5555	79.1278	40.986	75.8879
36.6821	81.2507	39.6483	79.2528	41.0826	76.0129
36.7674	81.3757	39.7413	79.3778	41.1795	76.1379
36.8529	81.5007	39.8344	79.5028	41.2762	76.2629
36.9386	81.6257	39.9278	79.6278	41.3734	76.3879
37.0245	81.7507	40.0212	79.7528	41.4703	76.5129
37.1106	81.8757	40.1149	79.8778	41.5681	76.6379
37.1969	82.0007	40.2087	80.0028	41.6654	76.763
37.2834	82.1257	40.3026	80.1278	41.7633	76.888
37.3702	82.2507	40.3968	80.2528	41.8614	77.013
37.4571	82.3757	40.4911	80.3778	41.9594	77.138
37.5443	82.5007	40.5855	80.5028	42.0572	77.263
37.6316	82.6257	40.6802	80.6278	42.1557	77.388
37.7192	82.7507	40.775	80.7528	42.2537	77.5131
37.807	82.8757	40.8699	80.8778	42.3525	77.6381
37.8949	83.0007	40.965	81.0028	42.4514	77.7631
37.9831	83.1257	41.0602	81.1278	42.5501	77.8881
38.0714	83.2507	41.1556	81.2528	42.6486	78.0131
38.16	83.3757	41.2512	81.3778	42.7478	78.1381
38.2488	83.5007	41.3468	81.5028	42.847	78.2631
38.3377	83.6257	41.4428	81.6279	42.9464	78.3881
38.4268	83.7507	41.5387	81.7529	43.0459	78.5131
38.5162	83.8757	41.6351	81.8779	43.1457	78.6381
38.6057	84.0007	41.7314	82.0029	43.245	78.7631
38.6954	84.1257	41.8278	82.1279	43.345	78.8881
38.7853	84.2507	41.9244	82.2529	43.4449	79.0131
38.8756	84.3757	42.0211	82.3779	43.5449	79.1381
38.9659	84.5007	42.118	82.5029	43.6451	79.2631
39.0564	84.6257	42.215	82.6279	43.7453	79.3881
39.1471	84.7507	42.3122	82.7529	43.8454	79.5131
39.2379	84.8757	42.4094	82.8779	43.9462	79.6382
39.3289	85.0007	42.5069	83.0029	44.0463	79.7632
39.4201	85.1257	42.6044	83.1279	44.1475	79.8882
39.5114	85.2507	42.7022	83.2529	44.2489	80.0132
39.6029	85.3757	42.8	83.3779	44.3498	80.1382
39.6947	85.5007	42.898	83.5029	44.4505	80.2632
39.7865	85.6257	42.9961	83.6279	44.552	80.3883
39.8786	85.7507	43.0943	83.7529	44.6526	80.5134
39.9708	85.8757	43.1927	83.8779	44.7551	80.6384
40.0632	86.0007	43.2912	84.0029	44.8563	80.7635
40.1558	86.1257	43.3899	84.1279	44.9581	80.8885
40.2485	86.2507	43.4886	84.2529	45.0595	81.0136
40.3414	86.3757	43.5876	84.3779	45.1618	81.1386
40.4345	86.5007	43.6866	84.5029	45.2642	81.2636
40.5277	86.6257	43.7858	84.6279	45.3663	81.3886
40.6211	86.7507	43.885	84.7529	45.4684	81.5136
40.7147	86.8757	43.9845	84.8779	45.5713	81.6387
40.8084	87.0007	44.084	85.0029	45.6735	81.7638
40.9023	87.1257	44.1837	85.1279	45.7765	81.8888
40.9964	87.2507	44.2835	85.2529	45.879	82.0138
41.0906	87.3757	44.3834	85.3779	45.9818	82.1388
41.1849	87.5007	44.4834	85.5029	46.0847	82.2638
41.2794	87.6257	44.5836	85.6279	46.1879	82.3889
41.3741	87.7507	44.6838	85.7529	46.2906	82.5139
41.4689	87.8757	44.7842	85.8779	46.3939	82.6389
41.5639	88.0007	44.8847	86.0029	46.4973	82.7639
41.6591	88.1257	44.9854	86.1279	46.6007	82.8889
41.7543	88.2507	45.0861	86.2529	46.7043	83.0139
41.8498	88.3757	45.187	86.3779	46.808	83.1389
41.9454	88.5007	45.288	86.5029	46.9115	83.2639
42.0411	88.6257	45.3891	86.6279	47.0158	83.3889
42.137	88.7507	45.4903	86.7529	47.1198	83.5139
42.233	88.8757	45.5916	86.8779	47.2238	83.6389
42.3292	89.0007	45.693	87.0029	47.3276	83.7639
42.4255	89.1257	45.7946	87.1279	47.4322	83.8889
42.5219	89.2507	45.8962	87.2529	47.536	84.0139
42.6185	89.3757	45.998	87.3779	47.6406	84.1389
42.7153	89.5007	46.0999	87.5029	47.7452	84.2639
42.8122	89.6257	46.2019	87.6279	47.85	84.389
42.9092	89.7507	46.304	87.7529	47.9548	84.514
43.0064	89.8757	46.4062	87.8779	48.0598	84.639
43.1038	90.0007	46.5085	88.0029	48.1645	84.764
43.2012	90.1257	46.6109	88.1279	48.2696	84.8891
43.2988	90.2507	46.7135	88.2529	48.3741	85.0142
43.3965	90.3757	46.8161	88.3779	48.4799	85.1392
43.4944	90.5007	46.9188	88.5029	48.5851	85.2642
43.5924	90.6257	47.0217	88.6279	48.6904	85.3892
43.6905	90.7507	47.1246	88.7529	48.7958	85.5142
43.7887	90.8757	47.2277	88.8779	48.9014	85.6392
43.8871	91.0007	47.3308	89.0029	49.0071	85.7643
43.9856	91.1257	47.4341	89.1279	49.1129	85.8893
44.0842	91.2507	47.5374	89.2529	49.2188	86.0143
44.183	91.3757	47.6409	89.3779	49.3248	86.1393
44.2819	91.5007	47.7445	89.5029	49.4306	86.2643
44.3809	91.6257	47.8482	89.6279	49.5365	86.3893
44.4801	91.7507	47.9521	89.7529	49.6423	86.5143
44.5793	91.8757	48.0559	89.8779	49.7489	86.6393
44.6788	92.0007	48.1599	90.0029	49.8555	86.7643
44.7783	92.1257	48.2639	90.1279	49.9616	86.8893
44.8779	92.2507	48.3681	90.2529	50.0677	87.0143
44.9777	92.3757	48.4723	90.3779	50.1747	87.1393
45.0776	92.5007	48.5767	90.5029	50.2814	87.2643
45.1776	92.6257	48.6811	90.6279	50.3883	87.3893
45.2777	92.7507	48.7856	90.7529	50.4949	87.5143
45.3779	92.8757	48.8902	90.8779	50.6018	87.6393
45.4783	93.0007	48.9949	91.0029	50.7084	87.7643
45.5788	93.1257	49.0997	91.1279	50.8155	87.8893
45.6794	93.2507	49.2046	91.2529	50.9227	88.0143
45.7801	93.3757	49.3096	91.3779	51.0299	88.1394
45.8809	93.5007	49.4146	91.5029	51.1373	88.2644
45.9819	93.6257	49.5198	91.6279	51.2447	88.3894
46.0829	93.7507	49.625	91.7529	51.3522	88.5144
46.1841	93.8757	49.7304	91.8779	51.4598	88.6394
46.2854	94.0007	49.8358	92.0029	51.567	88.7644
46.3868	94.1257	49.9413	92.1279	51.6747	88.8895
46.4883	94.2507	50.0469	92.2529	51.7825	89.0145
46.5899	94.3757	50.1526	92.3779	51.8905	89.1395
46.6917	94.5007	50.2584	92.5029	51.9985	89.2645
46.7935	94.6257	50.3642	92.6279	52.1065	89.3895
46.8954	94.7507	50.4701	92.7529	52.2145	89.5145
46.9975	94.8757	50.5763	92.8779	52.3227	89.6395
47.0996	95.0007	50.6825	93.0029	52.4305	89.7645
47.2019	95.1257	50.7887	93.1279	52.539	89.8896
47.3043	95.2507	50.8949	93.2529	52.6472	90.0146
47.4068	95.3757	51.0013	93.3779	52.7559	90.1396
47.5093	95.5007	51.1077	93.5029	52.8645	90.2646
47.612	95.6257	51.2142	93.6279	52.9727	90.3896
47.7148	95.7507	51.3208	93.7529	53.081	90.5146
47.8177	95.8757	51.4275	93.8779	53.1901	90.6397
47.9207	96.0007	51.5343	94.0029	53.2985	90.7648
48.0239	96.1257	51.6411	94.1279	53.4078	90.8898
48.1271	96.2507	51.748	94.2529	53.5166	91.0148
48.2304	96.3757	51.855	94.3779	53.6253	91.1398
48.3338	96.5007	51.9621	94.5029	53.734	91.2648
48.4373	96.6257	52.0692	94.6279	53.8438	91.3898
48.5409	96.7507	52.1765	94.7529	53.9527	91.5149
48.6446	96.8757	52.2838	94.8779	54.062	91.6399
[truncated: 447 more rows]

## Sheet: Supplementary_fig.6
Supplementary Fig. 6
Supplementary Fig. 6a
Current density-Box plot
PANX3_WT	PANX3_C-del
151.998	115.32
77.6524	136.212
75.0341	118.066
97.1917	99.1953
119.918	106.978
128.595
Supplementary Fig. 6b (Surface expression)
PANX3_WT	PANX3_C-del	PANX3_I74A	PANX3_I74W
0.285624	0.608776	0.389268	0.56689
0.82316	0.457437	1.07308	0.194193
0.553749	0.669712	0.623555	0.705281
0.779371	0.881576	0.635334	0.24432
0.367341	0.636473	0.309926	0.611607
0.754439	0.452677	0.582316	0.47805
0.736765	0.517194	0.687805	0.33268
0.811122	0.573106	0.793246	0.451797
0.453199	0.698213	0.511946	0.506888
0.876923	0.965663	0.286652	0.970943
0.351038	0.359007	0.279691	0.897012
0.557064	0.702021	0.495305	0.355837
0.607007	0.770096	0.501013	0.650434
0.428971	0.972263	0.741411	0.458251
1.05636	0.658599	1.18322	0.348511
1.40127	0.806695	0.393611	0.391741
0.405643	0.652111	0.672014	0.66325
0.549243	0.725041	1.03384	0.68449
0.820935	0.86898	0.702703	0.499474
0.483049	0.338481	0.421649	0.823825
0.457408	1.09866	0.896587	0.732494
0.363524	1.10149	0.63825	1.12494
1.13665	0.407918	0.610106	0.448942
0.672383	0.981271	1.29762	0.348766
0.484302	1.29981	0.421985	0.592338
0.969375	0.857078	0.742032	0.332304
0.809221	0.649573	0.597603	0.515955
0.332725	0.654264	1.12265	0.466352
0.388294	0.743727	0.522097	0.538647
0.586459	1.04897	0.655374	0.451952
0.617458	0.666231	0.569754	0.837948
0.829569	0.765361	0.510255	0.582218
0.851069	0.917031	0.86189	0.513383
0.975935	1.38569	1.02711	0.62338
0.805755	0.881543	0.322853	0.503202
0.470785	0.815157	1.07745	0.70696
0.630606	1.35245	0.422449	0.409824
0.873096	0.74682	0.237406	0.562564
0.966019	0.462361	0.866665	0.670606
0.537453	0.621892	0.627686	0.434907
0.944417	1.13787	0.34788	0.503529
0.914389	0.557195	0.59899	1.22634
0.580058	0.662554	1.20013	0.40617
0.770465	1.30014	0.481761	0.254345
0.289593	0.409176	1.04851	0.451328
0.336451	0.787511	0.900829
0.882271		0.180377
0.394207		0.993837
0.735496		0.361607
0.876543		0.235744
1.09589
0.5
0.788889
0.479452
1.4
0.609375
0.946429
0.625
1.1087

## Sheet: Supplementary_fig7
Supplementary Fig. 7a
MST (PANX1-ATP)
ATP(X)	Fnorm[%](Y)
0.0025	948.305
0.00125	947.213
0.000625	945.513
0.0003125	943.753
0.00015625	942.393
7.8125e-05	940.842
3.90625e-05	940.176
1.95313e-05	939.561
9.76563e-06	940.023
4.88281e-06	939.947
6.10352e-07	940.707
1.52588e-07	939.54
(Supplementary Fig. 7b)
PANX1-WT_1			PANX1-WT_2			PANX1-WT_3			PANX1-WT_normalized
ATP-gS(M)(X)	Fnorm [%](Y)		ATP-gS(M)(X)	Fnorm [%](Y)		ATP-gS(M)(X)	Fnorm [%](Y)		ATP-gS(M)(X)	Y1	Y2	Y3
0.002	808.732		0.002	805.029		0.002	895.226		0.002	0.868899	0.849459	0.979561
0.001	808.281		0.001	807.053		0.001	896.399		0.001	1	1	0.956477
0.0005	809.132		0.0005	805.751		0.0005	895.388		0.0005	0.915676	0.870242	1
0.00025	808.308		0.00025	805.275		0.000125	894.661		0.00025	0.884792	0.777085	0.957873
0.000125	804.512		0.000125	801.094		6.25e-05	893.323		0.000125	0.613965	0.605338	0.763709
6.25e-05	804.081		3.125e-05	799.214		3.125e-05	893.334		6.25e-05	0.49216	0.606794	0.741681
3.125e-05	802.733		1.5625e-05	800.412		1.5625e-05	893.189		3.125e-05	0.56977	0.588188	0.67269
1.5625e-05	798.455		7.8125e-06	797.854		7.8125e-06	891.656		1.5625e-05	0.403988	0.391452	0.453869
7.8125e-06	798.32		3.90625e-06	795.175		3.90625e-06	892.348		7.8125e-06	0.230436	0.480309	0.446982
1.95313e-06	793.148		1.95313e-06	795.343		1.95313e-06	889.952		1.95313e-06	0.241307	0.17286	0.182422
4.88281e-07	790.425		4.88281e-07	793.683		4.88281e-07	889.697		4.88281e-07	0.0233114	0.138952	0.0431853
2.44141e-07	790.295		6.10352e-08	791.618		2.44141e-07	891.06		2.44141e-07	0.13379	0.140158	0.0364951
6.10352e-08	789.581					6.10352e-08	888.605		6.10352e-08	0	0	0
(Supplementary Fig. 7c)
PANX3_WT_1			PANX3_WT_2			PANX3_WT_3			PANX3_WT_normalized
ATP-gS(M)(X)	Fnorm [%](Y)		ATP-gS(M)(X)	Fnorm [%](Y)		ATP-gS(M)(X)	Fnorm [%](Y)		ATP-gS(M)(X)	Y1	Y2	Y3
0.002	941.756					0.002	930.54		0.002	0.958392	0.940558	0.925028
0.001	942.15		0.002	977.086		0.001	931.347		0.001	1	1	1
0.0005	941.321		0.001	976.803		0.0005	930.209		0.0005	0.912434	0.947782	0.894182
0.00025	940.589		0.0005	975.337		0.00025	929.552		0.00025	0.835185	0.762997	0.833149
0.000125	939.798		0.00025	974.858		0.000125	928.864		0.000125	0.751679	0.786827	0.769245
6.25e-05	939.074		0.000125	974.623		6.25e-05	928.374		6.25e-05	0.675241	0.507659	0.72366
3.125e-05	935.415		6.25e-05	972.505		3.125e-05	923.722		3.125e-05	0.288879	0.357918	0.29126
1.5625e-05	934.873		3.125e-05	971.586		1.5625e-05	923.005		1.5625e-05	0.231696	0.155258	0.224565
3.90625e-06	935.088		1.5625e-05	971.021		3.90625e-06	923.123		3.90625e-06	0.254424	0	0.235554
9.76563e-07	934.849		3.90625e-06	969.641		9.76563e-07	922.693		9.76563e-07	0.229202	0.0328107	0.195615
4.88281e-07	932.678		4.88281e-07	970.735		4.88281e-07	920.589		4.88281e-07	0	0.0779351	0
	Supplementary Fig. 7d
PANX1WT	PANX1R217H	PANX1R75A	PANX1DM	Untransfected	PANX3
43.0562	74.8	70.0782	23.166	5.94811	29.9421
58.6371	34.5	75.5969	30.8501	14.5042	25.6552
46.1332	63.96	64.0979	19.46	1.89117	33.9818
61.8397	56.35	63.8619	16.0401	-0.02001	28.482
68.149			39.21		42.41
67.3085			37.63
43.05			32.72
Extended_Data_Figure_7e
PANX1-CBX
CBX(X)	Fnorm [%](Y)
0.005	920.663
0.0025	922.465
0.00125	924.087
0.000625	927.772
0.0003125	926.336
0.00015625	929.311
7.8125e-05	929.157
3.90625e-05	929.406
1.95313e-05	932.621
9.76563e-06	930.344
4.88281e-06	929.993
2.44141e-06	930.496
1.2207e-06	929.13
6.10352e-07	933.088
3.05176e-07	931.36
1.52588e-07	930.525
Extended_Data_Figure_7f
PANX1-buffer
ATP(M)(X)	Fnorm [%](Y)
0.002	908.562
0.001	907.021
0.0005	906.565
0.00025	905.96
0.000125	898.175
6.25e-05	906.779
3.125e-05	907.107
1.5625e-05	907.993
7.8125e-06	906.413
3.90625e-06	905.973
1.95313e-06	906.862
9.76563e-07	907.027
4.88281e-07	908.217
2.44141e-07	906.445
1.2207e-07	910.302
6.10352e-08	908.126

## Sheet: Supplementary_fig8
					Supplementary Fig. 8a _Current density -Voltage Plot
Voltage	Current density PANX1WT										Current density PANX1R217H										Current density PANX1R75A												Current density PANX1WR/RD												Current density Untransfected cells
-120	-53.3683	-54.9052	-59.2253	-33.5313	-30.9679	-25.2673	-29.9177	-53.8613	-28.586			-6.32787	-6.94653	-53.0388	-6.92724	-27.634	-20.6068	-20.8515			-31.7191	-15.6443	-9.08007	-13.8621	-33.3902	-36.0304	-35.1001	-37.292	-27.7783	-37.0475			-11.8004	-22.1708	-8.97784	-26.6782	-30.6957	-14.8448	-31.9279	-11.795	-21.6325	-12.86			-6.64663	-6.75872	-10.4464	-26.5385	-5.89469
-110	-45.1671	-45.7794	-49.8574	-27.9525	-26.2122	-19.7457	-26.5888	-45.5272	-23.6357			-4.70146	-5.5139	-43.9906	-5.87524	-18.4148	-16.996	-18.7587			-26.0243	-13.3036	-7.07696	-11.3935	-28.9133	-31.1039	-29.0687	-30.5406	-22.3148	-31.0189			-9.4967	-17.4126	-6.98717	-24.5806	-25.7284	-15.1073	-26.4361	-9.70516	-18.618	-10.5136			-5.21315	-5.55679	-10.2896	-19.2221	-4.72494
-100	-35.5807	-36.1944	-39.8423	-22.2916	-20.1382	-16.2627	-22.5037	-36.8021	-17.314			-3.68003	-4.68952	-35.1464	-4.39502	-18.0378	-13.6517	-15.8323			-21.0883	-11.1159	-4.99755	-9.23791	-23.5428	-26.0695	-23.2715	-23.9983	-18.3736	-24.788			-7.25617	-10.7824	-6.03762	-21.287	-22.1788	-11.446	-21.3046	-8.31049	-13.2166	-8.50265			-4.23424	-4.63788	-8.093	-16.7267	-3.76341
-90	-27.0639	-26.8434	-29.7049	-16.5031	-14.9502	-11.5601	-17.7035	-27.3825	-13.7377			-2.5597	-3.65686	-26.3163	-3.39746	-13.6294	-10.147	-12.252			-15.7073	-9.46076	-4.6599	-6.5934	-17.5675	-20.3275	-17.5463	-17.8139	-13.5305	-18.6985			-5.61655	-7.33127	-4.66565	-16.4474	-19.9964	-10.0788	-15.2417	-5.84832	-9.74564	-6.50921			-2.77426	-2.93293	-5.56476	-11.8332	-2.77246
-80	-17.3744	-18.3047	-20.0505	-11.127	-10.6317	-7.97024	-10.9504	-18.247	-8.17513			-2.12662	-2.22402	-17.425	-2.04776	-8.03469	-6.91287	-8.31526			-10.6057	-7.58415	-3.4193	-4.56084	-11.8054	-14.4129	-11.8209	-11.6196	-8.376	-12.659			-3.49827	-6.87642	-2.35055	-11.5801	-12.2954	-6.59953	-9.93738	-4.06128	-6.31065	-3.7684			-2.34072	-1.94074	-4.25513	-7.86796	-1.69123
-70	-8.77898	-9.18812	-9.73728	-5.78972	-3.9585	-4.10714	-5.77538	-9.37637	-4.0284			-0.73663	-0.97339	-9.13693	-0.68384	-5.07652	-3.38802	-4.42275			-5.47103	-5.71236	-1.41992	-2.30643	-6.01452	-9.23159	-5.93	-7.01379	-4.23565	-6.85408			-1.69142	-4.13207	-1.2322	-5.601	-6.14084	-4.07233	-4.75217	-2.25115	-3.03646	-1.40899			-1.30984	-0.85399	-1.63975	-3.18881	-0.79469
-60	0.068215	-0.01415	-0.00903	-0.03168	-0.63894	-0.38552	-0.93896	-0.04842	-0.41183			0.164584	0.051988	0.174377	0.185298	1.5998	-0.24984	0.06486			0.082425	-3.5943	0.867071	-0.09454	0.177981	-3.37963	0.020003	-0.66837	-0.07083	-0.76913			-0.10573	-1.74176	-0.11064	0.236108	0.033237	0.420588	0.29328	-0.13575	0.081181	0.340091			0.309177	0.097376	-0.41969	-0.51577	0.288798
-50	9.20686	9.2055	10.2387	5.48279	5.02844	4.71021	6.02672	9.10602	4.6247			0.848176	1.20035	8.9934	0.9834	4.1777	3.46023	4.38359			5.37136	-1.88611	1.72162	2.05944	5.97862	2.08075	5.99748	2.78077	5.12562	4.86159			1.63491	0.38998	1.71333	5.93325	6.16026	3.78127	4.77872	1.97047	3.43822	2.70316			0.821739	0.757116	0.374355	4.37506	1.13722
-40	18.4668	18.4401	20.29	10.9924	9.76082	8.361	11.4508	18.6455	9.69522			1.79227	2.09205	18.48	2.02639	7.88606	7.01455	9.34734			10.7548	0.559362	3.54778	4.16002	12.0866	8.24785	12.1914	9.15909	7.70285	10.8813			3.72859	2.10703	3.35929	12.5237	11.7555	8.02939	9.40785	3.98431	6.17201	4.35596			1.90554	1.88112	2.4658	6.71195	2.06993
-30	27.9374	27.5533	30.9596	17.0807	14.3666	12.4558	17.3937	28.6592	13.3934			2.98628	3.52454	27.499	2.96187	10.9155	10.882	14.0905			16.3577	3.94929	5.15369	6.44693	18.4322	15.016	18.4406	14.6097	12.3935	16.9835			5.78776	4.63738	5.20824	19.5535	19.9547	13.1385	14.2111	5.66779	10.0241	6.32087			3.10357	2.88748	4.80971	9.87874	3.12669
-20	38.0645	37.3786	41.2364	23.0011	21.2488	16.2509	22.7632	39.4027	18.6857			4.66828	4.84527	36.7756	3.85848	14.659	14.8073	18.9275			22.2056	8.71543	7.74683	8.71958	24.407	20.7076	24.9676	18.9879	18.1197	22.9368			9.18279	7.19703	6.85583	26.9804	26.8745	17.5998	17.8757	7.74297	14.0844	9.32953			4.05693	3.90275	6.93283	13.2944	4.75495
-10	48.4295	48.2326	51.7252	29.8736	29.6351	20.834	28.5077	50.7719	24.2776			6.94957	7.0791	46.4793	4.89638	18.74	19.0371	24.4969			27.7816	14.7994	11.294	11.0451	30.5385	26.4818	31.5132	24.741	23.8196	29.1021			14.0705	10.3032	9.38572	34.4734	34.9396	22.9139	23.1255	10.0229	19.17	11.7913			5.48445	5.00081	10.2926	16.349	6.52911
0	60.7088	60.2694	62.6298	36.953	40.2612	26.3586	34.8504	63.5385	30.5849			9.48711	9.52515	56.4834	6.33335	22.4339	23.7226	29.9437			34.4642	22.7004	16.4632	13.8874	37.0521	32.9303	37.8719	28.7862	30.179	35.5489			19.4643	13.6377	12.6309	43.0782	42.8041	27.531	26.7401	12.4834	25.586	15.53			6.98592	6.1418	12.572	20.1329	8.58181
10	75.5337	74.5272	74.191	46.868	51.7088	32.3192	41.8179	78.0837	38.6904			14.0727	12.8818	67.4978	8.47844	27.3165	29.0012	35.6141			41.1225	32.0013	22.7323	16.2324	43.2426	39.22	44.7128	36.6626	37.8685	41.8227			24.9896	18.9577	16.1904	50.7957	50.3078	32.6243	31.2487	14.8876	32.9985	19.5391			9.2747	7.85852	16.659	25.986	10.8293
20	93.1296	91.3169	86.1602	58.9419	64.3319	39.6517	48.4618	91.8037	49.7911			18.1031	16.3824	79.4302	9.9686	34.4519	34.9027	41.2057			48.2507	42.4186	28.3737	19.5264	49.7817	45.178	51.3479	41.7998	47.0242	48.1499			30.4595	25.596	20.3532	60.7793	60.2073	37.9299	36.4532	17.5984	40.5821	23.8577			11.1917	9.14733	22.4135	29.9451	13.1523
30	112.676	110.289	98.9861	70.9103	79.2015	47.325	55.4412	106.792	62.4545			22.5914	19.8016	90.8391	11.2892	38.3961	41.7504	47.0549			57.0488	54.6408	37.6364	22.8294	55.8258	51.1077	58.8845	48.5977	55.7918	54.3691			36.367	32.2669	25.7706	69.7874	72.7588	42.9746	40.4386	20.9831	50.3864	28.5114			13.2516	10.393	27.2459	34.8015	15.6639
40	133.264	130.385	112.556	84.1253	93.8083	55.2514	62.6041	122.799	74.7632			26.4265	24.8059	102.534	14.2076	42.0881	48.7086	53.5215			66.4377	65.7011	48.81	27.1295	61.8016	56.3083	66.1628	55.8276	65.4814	60.7447			43.1962	39.5209	32.4027	80.5881	82.053	47.8437	46.7688	24.3608	61.3901	34.273			15.2251	12.4304	32.4051	41.2406	18.2352
50	153.972	150.499	126.096	96.5401	110.98	63.1894	70.9298	139.25	87.2256			32.5223	31.553	113.219	17.63	52.7416	56.4588	61.364			75.4441	77.4021	56.6358	33.9993	66.9616	61.9114	72.4216	64.2629	75.9812	67.6675			49.6151	47.0804	39.6313	89.9509	94.5541	52.2409	53.0028	28.89	70.6806	40.9892			17.8568	13.7592	39.3083	44.6984	21.291
60	175.162	171.044	140.725	109.012	125.584	71.0302	81.1244	155.506	97.1936			39.5432	37.7075	124.255	23.5389	61.2561	64.6826	70.1273			84.8494	88.6371	72.2601	45.1082	73.1787	67.4985	80.5276	74.4415	87.6673	74.7179			57.2976	53.7722	47.1451	100.871	98.4949	55.9224	62.2211	35.633	79.3848	45.5906			19.6025	16.2255	44.4028	49.0087	24.0242
70	197.519	191.225	156.05	122.019	142.562	82.4597	94.5767	171.171	115.582			49.0987	48.6959	135.478	29.626	72.1712	75.3033	77.775			93.4086	99.4622	85.3444	57.0462	77.4494	72.7678	87.9403	85.34	98.6032	79.347			64.6017	62.5956	58.3948	117.503	105.346	60.8129	72.1265	46.2162	90.5708	51.2097			21.1766	18.4525	50.9781	55.1299	26.7705
80	217.531	211.583	170.544	135.182	157.605	92.9187	112.247	187.972	129.193			62.3049	56.94	147.448	46.2204	84.5018	84.7877	89.9266			102.81	111.12	103.399	71.0729	82.7138	77.4037	96.2879	96.7132	112.588	85.073			71.3439	71.4477	71.1228	126.584	113.073	65.3969	80.3836	63.4955	98.9157	58.1437			23.3604	20.4427	56.9929	60.0154	29.6683
90	239.631	232.396	186.273	148.46	175.14	109.041	135.345	199.138	143.664			75.3069	70.9299	159.75	55.7796	95.0065	93.9435	102.381			111.4	121.06	117.238	91.4044	88.3857	83.1204	106.379	110.497	125.886	93.1437			78.9808	79.3097	82.4691	138.751	124.837	72.3264	90.5943	78.7944	106.838	64.2926			24.7507	23.9985	62.1315	65.1597	32.4145
100	255.605	251.863	202.827	162.426	193.21	125.671	155.115	215.439	154.487			91.9965	86.3661	172.706	71.9898	112.336	102.745	116.89			121.657	131.88	142.638	110.534	93.1612	87.1539	115.172	123.687	135.664	101.439			88.1381	88.635	93.3986	142.455	129.442	79.0732	104.881	100.163	115.809	68.9977			25.7051	27.0114	68.5581	70.749	35.5115
110	276.651	274.591	218.356	178.733	206.131	138.443	185.293	227.282	169.451			109.082	97.1503	185.756	93.4456	124.565	111.285	127.686			130.015	141.944	167.358	128.027	100.496	93.983	125.892	131.577	148.118	106.815			95.4661	99.6964	105.959	149.418	148.713	88.4878	120.022	114.923	123.548	73.705			27.3244	30.4922	71.8447	77.3824	39.0054
120	288.449	295.594	232.249	188.96	220.425	156.859	190.89	236.392	182.843			130.181	114.762	196.898	117.91	147.681	119.484	130.736			138.964	151.246	204.014	161.695	100.385	93.1109	134.458	136.84	150.108	115.096			102.849	110.842	119.087	148.719	153.526	92.527	130.96	123.861	129.594	81.6042			29.582	32.5642	78.0972	85.398	42.0604
Supplementary Fig. 8b _Surface_Expression(PANX1_WT and its mutants)
PANX1_WT	PANX1_K24A	PANX1_R75A	PANX1_R128A	PANX1_WR/RD	PANX1_R217H
0.4827	0.675179	0.459434	1.34069	1.1777	0.353346
0.760942	0.354546	0.851494	1.26087	1.09428	0.955757
0.363504	0.888685	1.02407	1.51271	1.41126	0.625507
0.3666	0.901617	2.12349	0.662809	2.07694	2.00689
0.968946	0.623955	0.762224	1.45234	2.34484	0.658368
0.908878	0.593126	2.93475	2.14879	1.2069	0.333153
0.604007	0.993659	1.6912	1.69759	1.92913	1.07765
1.34798	0.956966	1.28841	1.34031	1.84431	0.517211
0.840635	1.18401	1.71835	0.656971	2.39485	0.65466
1.09593	0.925187	0.499991	0.75264	2.15651	0.550942
0.395349	0.343874	1.90974	1.34954	0.752681	1.19173
0.543864	0.445297	1.55368	1.56315	2.00694	1.92753
1.27273	1.25438	3.15838	1.70412	1.02562	1.51421
0.500558	0.367197	1.74407	1.73381	1.129	1.36096
1.12832	0.404939	1.15429	1.84944	1.2356	2.19421
0.466023	0.554036	3.23983	1.25283	1.41303	1.5437
0.692308	0.277849	2.56535	0.875587	1.03975	0.846634
0.820513	1.10636	0.75373	0.873405	1.28169	0.535672
0.794872	0.535472	1.36678	1.91228	1.3473	0.554136
1.1572	0.70647	2.52737	2.66563	1.03314	2.12331
1.24558	0.450213	2.29636	0.807982	1.09156	2.35629
1.01379	0.997204	2.71892	2.39637	1.28689	0.30293
0.966463	1.30481	1.52397	0.676816	1.98148	2.302
1.93743	0.509395	1.96747	0.338124	1.25707	1.29054
0.801718	0.876	1.88211	1.0672	1.53479	0.923798
1.27422	1.11194	2.37701	0.591621	0.426383	0.817709
1.27437	1.11937	2.56687	0.373968	2.15837	1.10187
0.375643	0.692593	0.503319	0.435827	0.955946	1.30533
0.487179	0.586459	0.898336	0.697746	1.16903	1.8752
0.577909	0.750582	0.695526	0.472104	2.1256	2.54391
0.306383	0.678171	0.532333	1.00785	2.62188	0.366722
0.814871	1.03349	0.35509	0.787846	1.29451	1.00342
1.70182	0.558125	0.814332	0.581034	1.30147	1.3447
0.490186	0.472499	0.885914	1.45277	1.38416	1.43175
0.674261	0.807028	2.19924	1.19264	2.99648	2.51288
1.0655	0.908001	2.48261	1.30857	2.16936	0.783354
1.05823	1.13038	2.34939	0.254873	1.87628	2.1137
1.88636	0.770787	1.65508	0.516488	1.47511	1.02433
2	0.935761	0.443064	1.2893	1.00266	1.97192
1.09654	0.448654	0.45262	0.422583	0.728741	1.92219
1.83437	0.839497	1.02897	0.55493	1.21573	1.65497
0.786587	0.813285	1.19474	1.43057	0.71844	0.648407
1.99749		1.09978	0.501043	1.50552	1.09978
0.88626			1.00921
1.45951			0.988583
1.21392			2.13272
1.2353			2.01744
			0.822326
			0.685035
			1.33666
			0.84066
			0.862029
			1.23683
			1.43884
			1.0788
			1.20753
			2.39396
Conductance-density - Voltage plot (Supplementary Fig. 8c)
Voltage	PANX1-WT							PANX1-R217H									PANX1-R75A										PANX1-WR/RD
-120	0.889471	0.915086	0.558855	0.516131	0.897688			0.105464	0.115775	0.115454	0.460566	0.343447	0.347524				0.528652	0.151334	0.231035	0.585002	0.462972						0.196674	0.149631	0.511595	0.247413	0.532132	0.196583	0.360542	0.214333
-110	0.903342	0.915587	0.559051	0.524244	0.910544			0.094029	0.110278	0.117505	0.368295	0.33992	0.375173				0.520487	0.141539	0.22787	0.581374	0.446295						0.189934	0.139743	0.514567	0.302146	0.528721	0.194103	0.372359	0.210271
-100	0.889518	0.904859	0.55729	0.503454	0.920053			0.092001	0.117238	0.109876	0.450944	0.341292	0.395809				0.527208	0.124939	0.230948	0.581788	0.459341						0.181404	0.15094	0.55447	0.286151	0.532614	0.207762	0.330416	0.212566
-90	0.90213	0.894779	0.550102	0.498339	0.912751			0.085323	0.121895	0.113249	0.454313	0.338234	0.408401				0.523577	0.15533	0.21978	0.584876	0.451017						0.187218	0.155522	0.666545	0.33596	0.508057	0.194944	0.324855	0.216974
-80	0.868718	0.915237	0.556352	0.531585	0.91235			0.106331	0.111201	0.102388	0.401734	0.345644	0.415763				0.530287	0.170965	0.228042	0.591047	0.4188						0.174913	0.117527	0.61477	0.329976	0.496869	0.203064	0.315533	0.18842
-70	0.877898	0.918812	0.578972	0.39585	0.937637			0.073663	0.097339	0.068384	0.507652	0.338802	0.442275				0.547103	0.141992	0.230643	0.593	0.423565						0.169142	0.12322	0.614084	0.407233	0.475217	0.225115	0.303646	0.140899
-60
-50	0.920686	0.92055	0.548279	0.502844	0.910602			0.084818	0.120035	0.09834	0.41777	0.346023	0.438359				0.537136	0.172162	0.205944	0.599748	0.512562						0.163491	0.171333	0.616026	0.378127	0.477873	0.197047	0.343822	0.270316
-40	0.92334	0.922005	0.549618	0.488041	0.932274			0.089614	0.104603	0.10132	0.394303	0.350728	0.467367				0.53774	0.177389	0.208001	0.609572	0.385142						0.186429	0.167964	0.587774	0.40147	0.470392	0.199215	0.308601	0.217798
-30	0.931247	0.918442	0.569356	0.478887	0.955307			0.099543	0.117485	0.098729	0.363851	0.362734	0.469683				0.545257	0.17179	0.214898	0.614687	0.413117						0.192925	0.173608	0.665155	0.437951	0.473702	0.188926	0.334136	0.210696
-20	0.951612	0.934465	0.575028	0.53122	0.985067			0.116707	0.121132	0.096462	0.366474	0.370183	0.473188				0.555141	0.193671	0.21799	0.62419	0.452993						0.22957	0.171396	0.671863	0.439995	0.446892	0.193574	0.35211	0.233238
-10	0.968589	0.964652	0.597473	0.592702	1.01544			0.138991	0.141582	0.097928	0.374799	0.380741	0.489938				0.555631	0.225881	0.220902	0.630265	0.476391						0.281409	0.187714	0.698793	0.458278	0.46251	0.200459	0.3834	0.235827
0	1.01181	1.00449	0.615883	0.671021	1.05897			0.158119	0.158752	0.105556	0.373898	0.395377	0.499061				0.574404	0.274386	0.231457	0.631198	0.502984						0.324405	0.210515	0.713401	0.45885	0.445669	0.208056	0.426434	0.258834
10	1.07905	1.06467	0.669543	0.738697	1.11548			0.201038	0.184026	0.121121	0.390236	0.414302	0.508773				0.587465	0.324747	0.231892	0.638754	0.540979						0.356995	0.231291	0.718683	0.466061	0.446411	0.212681	0.471407	0.27913
20	1.16412	1.14146	0.736773	0.804149	1.14755			0.226289	0.20478	0.124608	0.430649	0.436284	0.515071				0.603134	0.354672	0.244079	0.641849	0.587803						0.380743	0.254415	0.752591	0.474124	0.455666	0.21998	0.507277	0.298221
30	1.25196	1.22543	0.787892	0.880017	1.18658			0.251016	0.220018	0.125435	0.426624	0.463893	0.522832				0.633875	0.418182	0.25366	0.654272	0.619909						0.404078	0.28634	0.808431	0.477495	0.449318	0.233146	0.559849	0.316793
40	1.33264	1.30385	0.841253	0.938083	1.22799			0.264265	0.248059	0.142076	0.420881	0.487086	0.535215				0.664377	0.4881	0.271295	0.661628	0.654814						0.431962	0.324027	0.82053	0.478437	0.467688	0.243608	0.613901	0.34273
50	1.39974	1.36817	0.877637	1.00891	1.26591			0.295657	0.286845	0.160273	0.479469	0.513261	0.557855				0.685855	0.514871	0.309084	0.658378	0.690738						0.451047	0.360285	0.859583	0.474917	0.481844	0.262637	0.642551	0.372629
60	1.45969	1.42537	0.908436	1.04653	1.29588			0.329527	0.314229	0.196157	0.510467	0.539021	0.584394				0.707078	0.602168	0.375901	0.671063	0.730561						0.47748	0.392875	0.820791	0.46602	0.518509	0.296942	0.66154	0.379921
70	1.51938	1.47096	0.938612	1.09663	1.3167			0.377682	0.374584	0.227892	0.555163	0.579256	0.598269				0.718528	0.656495	0.438817	0.676464	0.758486						0.496936	0.449191	0.810353	0.467791	0.554819	0.355509	0.696699	0.393921
80	1.5538	1.51131	0.965588	1.12575	1.34266			0.445035	0.406715	0.330146	0.603585	0.605627	0.642333				0.73436	0.738563	0.507663	0.68777	0.804198						0.509599	0.50802	0.807665	0.467121	0.574169	0.453539	0.706541	0.415312
90	1.59754	1.5493	0.989732	1.1676	1.32759			0.502046	0.472866	0.371864	0.633377	0.62629	0.682538				0.742663	0.781589	0.609363	0.709191	0.83924						0.526539	0.549794	0.832244	0.482176	0.603962	0.525296	0.712256	0.428617
100	1.59753	1.57414	1.01516	1.20757	1.34649			0.574978	0.539788	0.449936	0.702102	0.642153	0.730563				0.760359	0.891487	0.69084	0.719824	0.8479						0.550863	0.583741	0.809015	0.494208	0.655506	0.626017	0.723807	0.431236
110	1.62736	1.61524	1.05137	1.21253	1.33695			0.64166	0.571472	0.54968	0.732733	0.65462	0.751092				0.764794	0.984459	0.7531	0.740541	0.871285						0.561565	0.623287	0.874779	0.520516	0.706014	0.67602	0.726752	0.433559
120	1.6025	1.64219	1.04978	1.22458	1.31329			0.723228	0.637567	0.655055	0.820451	0.663801	0.726309				0.772021	1.13341	0.898306	0.746991	0.833934						0.571384	0.661596	0.852921	0.514039	0.727555	0.688114	0.719968	0.453357
[truncated: 14 more columns]

## Sheet: Supplementay_fig9
Supplementary Fig. 9
Supplementary_Fig. 9a	PANX1WT		Supplementary_Fig. 9b	PANX1R217H		Supplementary_Fig. 9c	PANX1WR/RD		Supplementary_Fig. 9d	PANX3		Supplementary_Fig. 9e	PANX1R24A		Supplementary_Fig. 9f	PANX1R75A		Supplementary_Fig. 9g	PANX1R128A
Volume(ml)	Absorbance(mAU)		Volume(ml)	Absorbance(mAU)		Volume(ml)	Absorbance(mAU)		Volume(ml)	Absorbance(mAU)		Volume(ml)	Absorbance(mAU)		Volume(ml)	Absorbance(mAU)			Absorbance(mAU)
-1.02538	0.00076		-1.02501	-1.19466		-1.02533	0		-1.02507	0		-1.02458	0		-1.0256	2.01025		-1.02501	3.35287
-1.02472	1.14166		-1.02434	-1.28556		-1.02466	-0.022005		-1.02441	-0.16044		-1.02392	0.218435		-1.02493	1.99331		-1.0244	3.34025
-1.02405	1.14076		-1.02367	-1.28485		-1.024	-0.021453		-1.02374	-0.160998		-1.02325	0.218147		-1.02427	1.99284		-1.0238	3.34119
-1.02338	1.14054		-1.02301	-1.28439		-1.02333	-0.020704		-1.02307	-0.161708		-1.02259	0.217585		-1.0236	1.99249		-1.02319	3.3421
-1.02272	1.13976		-1.02234	-1.28354		-1.02266	-0.019897		-1.02241	-0.162373		-1.02192	0.216457		-1.02293	1.99198		-1.02259	3.34267
-1.02205	1.13891		-1.02168	-1.28259		-1.022	-0.019158		-1.02174	-0.163893		-1.02126	0.215776		-1.02227	1.99141		-1.02198	3.3429
-1.02139	1.13777		-1.02101	-1.28251		-1.02133	-0.01818		-1.02108	-0.165629		-1.02059	0.2154		-1.0216	1.99106		-1.02137	3.34316
-1.02072	1.14802		-1.02035	-1.27989		-1.02067	-0.017198		-1.02041	-0.167006		-1.01993	0.230838		-1.02094	1.99086		-1.02077	3.34328
-1.02006	1.24239		-1.01968	-1.27172		-1.02	-0.016331		-1.01975	-0.168261		-1.01926	0.274128		-1.02027	1.99051		-1.02016	3.34773
-1.01939	1.31574		-1.01902	-1.26716		-1.01934	-0.015161		-1.01908	-0.169695		-1.0186	0.286144		-1.01961	1.98985		-1.01956	3.35513
-1.01873	1.31576		-1.01835	-1.266		-1.01867	-0.014125		-1.01841	-0.171221		-1.01793	0.286274		-1.01894	1.98923		-1.01895	3.35779
-1.01806	1.31634		-1.01768	-1.26636		-1.018	-0.000869		-1.01775	-0.17263		-1.01727	0.287188		-1.01827	1.9888		-1.01835	3.35805
-1.0174	1.31734		-1.01702	-1.26624		-1.01734	0.024228		-1.01708	-0.174242		-1.0166	0.287483		-1.01761	2.00453		-1.01774	3.35746
-1.01673	1.31768		-1.01635	-1.2667		-1.01667	0.049325		-1.01642	-0.175832		-1.01594	0.287519		-1.01694	2.03227		-1.01713	3.35615
-1.01606	1.31833		-1.01569	-1.2662		-1.01601	0.068994		-1.01575	-0.175692		-1.01527	0.287607		-1.01628	2.05475		-1.01653	3.35507
-1.0154	1.31887		-1.01502	-1.26588		-1.01534	0.06872		-1.01508	-0.176104		-1.0146	0.287643		-1.01561	2.05479		-1.01592	3.35487
-1.01473	1.31878		-1.01436	-1.26536		-1.01467	0.068549		-1.01442	-0.175625		-1.01394	0.287689		-1.01494	2.05418		-1.01532	3.35595
-1.01407	1.31829		-1.01369	-1.26568		-1.01401	0.069268		-1.01375	-0.175595		-1.01327	0.287699		-1.01428	2.05457		-1.01471	3.35735
-1.0134	1.3181		-1.01303	-1.26568		-1.01334	0.06859		-1.01309	-0.175009		-1.01261	0.288047		-1.01361	2.05436		-1.01411	3.35829
-1.01274	1.31799		-1.01236	-1.26534		-1.01268	0.068816		-1.01242	-0.17454		-1.01194	0.287922		-1.01294	2.05377		-1.0135	3.35879
-1.01207	1.31831		-1.0117	-1.26615		-1.01201	0.069464		-1.01175	-0.174239		-1.01128	0.287265		-1.01228	2.05308		-1.0129	3.35895
-1.01141	1.31851		-1.01103	-1.26679		-1.01134	0.070159		-1.01109	-0.174242		-1.01061	0.287364		-1.01161	2.05305		-1.01229	3.35877
-1.01074	1.31804		-1.01036	-1.26718		-1.01068	0.070895		-1.01042	-0.175526		-1.00995	0.288043		-1.01095	2.05342		-1.01169	3.35848
-1.01007	1.31844		-1.0097	-1.26702		-1.01001	0.071458		-1.00976	-0.175307		-1.00928	0.289126		-1.01028	2.05391		-1.01108	3.35839
-1.00941	1.31865		-1.00903	-1.26621		-1.00935	0.072088		-1.00909	-0.17424		-1.00862	0.28977		-1.00961	2.05411		-1.01048	3.3582
-1.00874	1.31761		-1.00837	-1.26551		-1.00868	0.071784		-1.00842	-0.174125		-1.00795	0.289139		-1.00895	2.05409		-1.00987	3.35852
-1.00808	1.31696		-1.0077	-1.26524		-1.00801	0.072163		-1.00776	-0.173505		-1.00729	0.288726		-1.00828	2.05269		-1.00926	3.35968
-1.00741	1.31766		-1.00704	-1.26507		-1.00735	0.072122		-1.00709	-0.173882		-1.00662	0.288985		-1.00762	2.05282		-1.00866	3.36027
-1.00675	1.31826		-1.00637	-1.26447		-1.00668	0.072488		-1.00643	-0.173332		-1.00596	0.289586		-1.00695	2.05335		-1.00805	3.36031
-1.00608	1.31819		-1.00571	-1.26492		-1.00602	0.072596		-1.00576	-0.172684		-1.00529	0.289005		-1.00629	2.05421		-1.00745	3.35992
-1.00541	1.31905		-1.00504	-1.2648		-1.00535	0.0735		-1.00509	-0.172994		-1.00463	0.288624		-1.00562	2.05398		-1.00684	3.35895
-1.00475	1.32036		-1.00437	-1.26473		-1.00468	0.073438		-1.00443	-0.173048		-1.00396	0.07469		-1.00495	2.05385		-1.00624	3.35983
-1.00408	0.55511		-1.00371	-0.413286		-1.00402	0.07301		-1.00376	-0.172712		-1.0033	-0.000428		-1.00429	2.05394		-1.00563	3.35963
-1.00342	0.001212		-1.00304	-0.000178		-1.00335	0.072306		-1.0031	-0.171894		-1.00263	0.000319		-1.00362	2.05291		-1.00503	3.35957
-1.00275	0.003389		-1.00238	-0.000805		-1.00269	0.07259		-1.00243	-0.172641		-1.00197	0.000463		-1.00296	2.05208		-1.00442	3.35948
-1.00209	0.006582		-1.00171	-0.001267		-1.00202	0.07377		-1.00176	-0.172625		-1.0013	0.000511		-1.00229	2.05179		-1.00381	1.71758
-1.00142	0.011225		-1.00105	-0.001294		-1.00135	0.074785		-1.0011	-0.17244		-1.00064	0.000859		-1.00162	2.05156		-1.00321	2.1e-05
-1.00076	0.017269		-1.00038	-0.001413		-1.00069	0.075658		-1.00043	-0.172752		-0.999971	0.00143		-1.00096	2.05151		-1.0026	2.4e-05
-1.00009	0.023388		-0.999715	-0.00133		-1.00002	0.076041		-0.999766	-0.172248		-0.999305	0.002666		-1.00029	2.05271		-1.002	-0.000129
-0.999426	0.030649		-0.999049	-0.001378		-0.999356	0.076098		-0.9991	-0.170946		-0.99864	0.003619		-0.999625	2.05358		-1.00139	-0.000339
-0.99876	0.039494		-0.998384	-0.000849		-0.99869	0.059029		-0.998434	-0.047674		-0.997975	0.004514		-0.998959	2.03218		-1.00079	0.000143
-0.998095	0.048856		-0.997718	-3.4e-05		-0.998024	0.000175		-0.997768	0.000742		-0.99731	0.00507		-0.998293	0.021726		-1.00018	0.000438
-0.997429	0.059236		-0.997053	0.000162		-0.997358	0.000859		-0.997102	0.001976		-0.996645	0.005778		-0.997627	0.000667		-0.999576	0.000412
-0.996763	0.070789		-0.996387	0.000792		-0.996692	0.001548		-0.996436	0.003236		-0.995979	0.006714		-0.996961	0.001499		-0.99897	0.001279
-0.996098	0.082389		-0.995722	0.001411		-0.996026	0.002665		-0.99577	0.003557		-0.995314	0.008037		-0.996295	0.0026		-0.998365	0.000967
-0.995432	0.093945		-0.995056	0.001448		-0.99536	0.003692		-0.995104	0.00397		-0.994649	0.010338		-0.995629	0.003165		-0.997759	0.000455
-0.994767	0.105726		-0.99439	0.001798		-0.994694	0.005623		-0.994438	0.005338		-0.993984	0.011267		-0.994963	0.003934		-0.997154	0.000466
-0.994101	0.117133		-0.993725	0.001972		-0.994028	0.007316		-0.993772	0.006243		-0.993319	0.011904		-0.994297	0.005485		-0.996548	0.000606
-0.993436	0.128458		-0.993059	0.003058		-0.993362	0.009234		-0.993106	0.006238		-0.992654	0.012489		-0.993631	0.007214		-0.995943	4e-06
-0.99277	0.139862		-0.992394	0.003948		-0.992696	0.011627		-0.99244	0.006105		-0.991988	0.01404		-0.992965	0.010401		-0.995337	-0.000686
-0.992105	0.151014		-0.991728	0.00539		-0.99203	0.013065		-0.991774	0.006277		-0.991323	0.01506		-0.992299	0.013245		-0.994732	-0.000385
-0.991439	0.161004		-0.991063	0.005436		-0.991364	0.013888		-0.991108	0.006838		-0.990658	0.015857		-0.991633	0.016004		-0.994126	-0.000919
-0.990774	0.170925		-0.990397	0.005171		-0.990698	0.015065		-0.990443	0.007213		-0.989993	0.016558		-0.990967	0.018464		-0.993521	-0.000427
-0.990108	0.18069		-0.989732	0.004752		-0.990032	0.017193		-0.989776	0.007729		-0.989328	0.017708		-0.990301	0.0211		-0.992915	-0.000267
-0.989443	0.190101		-0.989066	0.005237		-0.989366	0.019188		-0.989111	0.007841		-0.988662	0.019369		-0.989635	0.023509		-0.99231	-8e-06
-0.988777	0.198123		-0.9884	0.00561		-0.9887	0.021334		-0.988445	0.007885		-0.987997	0.02103		-0.988969	0.026562		-0.991704	0.000116
-0.988112	0.206065		-0.987735	0.00632		-0.988034	0.022702		-0.987779	0.007929		-0.987332	0.023168		-0.988303	0.028645		-0.991099	-0.000371
-0.987446	0.213278		-0.987069	0.007048		-0.987368	0.023828		-0.987113	0.008741		-0.986667	0.024871		-0.987637	0.033099		-0.990493	-0.000341
-0.986781	0.21986		-0.986404	0.007307		-0.986702	0.02484		-0.986447	0.00958		-0.986002	0.026991		-0.986971	0.036613		-0.989888	-1.4e-05
-0.986115	0.224827		-0.985738	0.007188		-0.986036	0.026419		-0.985781	0.009713		-0.985336	0.028418		-0.986305	0.03982		-0.989282	-0.000401
-0.985449	0.230298		-0.985073	0.007582		-0.98537	0.027818		-0.985115	0.009852		-0.984671	0.030145		-0.985639	0.045112		-0.988677	-0.001136
-0.984784	0.233729		-0.984407	0.008287		-0.984704	0.028735		-0.984449	0.010164		-0.984006	0.032127		-0.984973	0.048713		-0.988071	-0.002362
-0.984118	0.237512		-0.983742	0.00924		-0.984038	0.030142		-0.983783	0.009938		-0.983341	0.033805		-0.984307	0.051651		-0.987466	-0.002072
-0.983453	0.241032		-0.983076	0.010305		-0.983372	0.031648		-0.983117	0.009624		-0.982676	0.036188		-0.983641	0.05549		-0.98686	-0.001828
-0.982787	0.243894		-0.98241	0.01067		-0.982706	0.032464		-0.982451	0.009836		-0.982011	0.037857		-0.982975	0.059474		-0.986255	-0.001678
-0.982122	0.245264		-0.981745	0.01077		-0.98204	0.033439		-0.981785	0.010441		-0.981345	0.039998		-0.982309	0.063334		-0.985649	-0.002085
-0.981456	0.246773		-0.981079	0.010891		-0.981374	0.033901		-0.981119	0.010691		-0.98068	0.04311		-0.981643	0.067654		-0.985044	-0.001838
-0.980791	0.248267		-0.980414	0.011285		-0.980708	0.033678		-0.980453	0.010795		-0.980015	0.046204		-0.980977	0.071389		-0.984438	-0.001955
-0.980125	0.249672		-0.979748	0.011808		-0.980042	0.03551		-0.979787	0.010524		-0.97935	0.048727		-0.980311	0.074857		-0.983833	-0.002282
-0.97946	0.250802		-0.979083	0.0119		-0.979376	0.036268		-0.979121	0.010834		-0.978685	0.052709		-0.979645	0.079813		-0.983227	-0.002043
-0.978794	0.251254		-0.978417	0.012415		-0.97871	0.037754		-0.978455	0.011153		-0.978019	0.056231		-0.978979	0.085284		-0.982622	-0.001957
-0.978129	0.251513		-0.977752	0.013805		-0.978044	0.037617		-0.977789	0.011494		-0.977354	0.059047		-0.978313	0.089166		-0.982016	-0.002885
-0.977463	0.251734		-0.977086	0.015058		-0.977378	0.036534		-0.977123	0.01275		-0.976689	0.062079		-0.977647	0.093941		-0.981411	-0.0036
-0.976798	0.250779		-0.976421	0.015096		-0.976712	0.036114		-0.976457	0.012868		-0.976024	0.064773		-0.976981	0.097516		-0.980805	-0.003909
-0.976132	0.249629		-0.975755	0.015474		-0.976046	0.035252		-0.975791	0.013216		-0.975359	0.067653		-0.976315	0.102262		-0.9802	-0.003512
-0.975466	0.249638		-0.975089	0.016153		-0.97538	0.036408		-0.975125	0.013175		-0.974693	0.071836		-0.975649	0.106877		-0.979594	-0.002942
-0.974801	0.248908		-0.974424	0.017088		-0.974714	0.03576		-0.974459	0.013446		-0.974028	0.074985		-0.974983	0.112628		-0.978989	-0.002486
-0.974135	0.246751		-0.973758	0.018405		-0.974048	0.035655		-0.973793	0.013667		-0.973363	0.07788		-0.974317	0.117748		-0.978383	-0.001642
-0.97347	0.244453		-0.973093	0.018293		-0.973382	0.034765		-0.973127	0.01393		-0.972698	0.081146		-0.973651	0.121585		-0.977778	-0.000753
-0.972804	0.242704		-0.972427	0.018943		-0.972716	0.034478		-0.972461	0.013957		-0.972033	0.084101		-0.972985	0.125966		-0.977172	0.000229
-0.972139	0.240555		-0.971762	0.019159		-0.97205	0.033985		-0.971795	0.014436		-0.971368	0.087262		-0.972319	0.130214		-0.976567	0.000399
-0.971473	0.237048		-0.971096	0.019458		-0.971384	0.033622		-0.971129	0.015392		-0.970702	0.089398		-0.971653	0.135518		-0.975961	0.000282
-0.970808	0.234508		-0.970431	0.02017		-0.970718	0.033652		-0.970463	0.015927		-0.970037	0.092823		-0.970987	0.139631		-0.975356	0.000638
-0.970142	0.231458		-0.969765	0.020867		-0.970052	0.033671		-0.969797	0.015583		-0.969372	0.09487		-0.970321	0.145376		-0.97475	0.000112
-0.969477	0.227598		-0.9691	0.021843		-0.969386	0.033131		-0.969131	0.015612		-0.968707	0.097744		-0.969655	0.151525		-0.974145	0.000404
-0.968811	0.223377		-0.968434	0.022268		-0.96872	0.032453		-0.968465	0.015333		-0.968042	0.101437		-0.968989	0.155938		-0.973539	0.001676
-0.968146	0.218031		-0.967768	0.023087		-0.968054	0.031761		-0.967799	0.015515		-0.967376	0.104386		-0.968323	0.161377		-0.972934	0.001826
-0.96748	0.210533		-0.967103	0.023768		-0.967388	0.030674		-0.967133	0.015678		-0.966711	0.106695		-0.967657	0.167276		-0.972328	0.001798
-0.966815	0.202009		-0.966437	0.023808		-0.966722	0.02969		-0.966467	0.014566		-0.966046	0.109011		-0.966991	0.171316		-0.971723	0.002108
-0.966149	0.192316		-0.965772	0.023927		-0.966056	0.028698		-0.965801	0.013415		-0.965381	0.111005		-0.966325	0.175751		-0.971117	0.002845
-0.965484	0.180732		-0.965106	0.023852		-0.96539	0.027434		-0.965135	0.012724		-0.964716	0.113342		-0.965659	0.181232		-0.970512	0.003804
-0.964818	0.168575		-0.964441	0.024413		-0.964724	0.025829		-0.964469	0.011932		-0.96405	0.115855		-0.964993	0.186684		-0.969906	0.004877
-0.964152	0.155089		-0.963775	0.024755		-0.964058	0.024003		-0.963803	0.011683		-0.963385	0.118106		-0.964327	0.191832		-0.969301	0.005981
-0.963487	0.140412		-0.96311	0.025447		-0.963392	0.022215		-0.963137	0.010916		-0.96272	0.120557		-0.963661	0.195897		-0.968695	0.007049
-0.962821	0.125074		-0.962444	0.025929		-0.962726	0.02057		-0.962471	0.010259		-0.962055	0.122533		-0.962995	0.200084		-0.96809	0.008157
-0.962156	0.110186		-0.961778	0.027068		-0.96206	0.018782		-0.961805	0.010177		-0.96139	0.124423		-0.962329	0.203935		-0.967484	0.009282
-0.96149	0.094528		-0.961113	0.027648		-0.961394	0.016501		-0.961139	0.009323		-0.960724	0.126436		-0.961663	0.208076		-0.966879	0.009677
-0.960825	0.078703		-0.960447	0.028339		-0.960728	0.013665		-0.960473	0.008633		-0.960059	0.128198		-0.960997	0.211105		-0.966273	0.009305
-0.960159	0.063023		-0.959782	0.028297		-0.960062	0.011473		-0.959807	0.007579		-0.959394	0.129517		-0.960331	0.21419		-0.965668	0.008906
-0.959494	0.047912		-0.959116	0.028919		-0.959396	0.009077		-0.959141	0.006725		-0.958729	0.131472		-0.959665	0.216803		-0.965062	0.009009
-0.958828	0.032722		-0.958451	0.028525		-0.95873	0.007184		-0.958475	0.006422		-0.958064	0.133948		-0.958999	0.219634		-0.964457	0.009511
-0.958163	0.018128		-0.957785	0.028026		-0.958064	0.004807		-0.95781	0.006172		-0.957399	0.136348		-0.958333	0.222858		-0.963851	0.010413
-0.957497	0.004896		-0.95712	0.02859		-0.957398	0.002678		-0.957144	0.005648		-0.956733	0.138465		-0.957667	0.225997		-0.963246	0.011586
-0.956832	-0.00862		-0.956454	0.02902		-0.956732	0.000418		-0.956478	0.00446		-0.956068	0.140294		-0.957001	0.228865		-0.96264	0.013063
-0.956166	-0.022135		-0.955789	0.028574		-0.956066	-0.00214		-0.955812	0.003474		-0.955403	0.142468		-0.956335	0.231784		-0.962035	0.014545
-0.955501	-0.034547		-0.955123	0.028363		-0.9554	-0.005068		-0.955146	0.002656		-0.954738	0.144614		-0.955669	0.234174		-0.961429	0.015386
-0.954835	-0.045833		-0.954457	0.028099		-0.954734	-0.007824		-0.95448	0.001432		-0.954073	0.14603		-0.955003	0.237423		-0.960824	0.016187
-0.95417	-0.057319		-0.953792	0.027589		-0.954068	-0.010542		-0.953814	0.000454		-0.953407	0.147882		-0.954337	0.239212		-0.960218	0.015959
-0.953504	-0.067786		-0.953126	0.027001		-0.953402	-0.012664		-0.953148	-0.000226		-0.952742	0.149429		-0.953671	0.240933		-0.959613	0.016331
-0.952838	-0.078342		-0.952461	0.027306		-0.952736	-0.015287		-0.952482	-0.000567		-0.952077	0.151293		-0.953005	0.243424		-0.959007	0.017379
-0.952173	-0.088457		-0.951795	0.02758		-0.95207	-0.018176		-0.951816	-0.000874		-0.951412	0.152862		-0.952339	0.244514		-0.958402	0.018827
-0.951507	-0.097602		-0.95113	0.02791		-0.951404	-0.019865		-0.95115	-0.001867		-0.950747	0.153877		-0.951673	0.246641		-0.957796	0.020133
-0.950842	-0.105723		-0.950464	0.028368		-0.950738	-0.021794		-0.950484	-0.002556		-0.950081	0.155535		-0.951007	0.249079		-0.957191	0.020891
-0.950176	-0.113993		-0.949799	0.02827		-0.950073	-0.024357		-0.949818	-0.002411		-0.949416	0.157357		-0.950341	0.250827		-0.956585	0.021331
-0.949511	-0.122241		-0.949133	0.028378		-0.949407	-0.02629		-0.949152	-0.002841		-0.948751	0.15904		-0.949675	0.252293		-0.95598	0.022011
-0.948845	-0.129866		-0.948467	0.028871		-0.948741	-0.027945		-0.948486	-0.003909		-0.948086	0.159891		-0.949009	0.253686		-0.955374	0.023235
-0.94818	-0.135776		-0.947802	0.028544		-0.948075	-0.029282		-0.94782	-0.004623		-0.947421	0.160497		-0.948343	0.254983		-0.954769	0.024581
-0.947514	-0.141332		-0.947136	0.027753		-0.947409	-0.030479		-0.947154	-0.005297		-0.946756	0.161305		-0.947677	0.256375		-0.954163	0.024982
-0.946849	-0.147383		-0.946471	0.027526		-0.946743	-0.032284		-0.946488	-0.005975		-0.94609	0.161985		-0.947011	0.258284		-0.953557	0.025411
-0.946183	-0.153343		-0.945805	0.027617		-0.946077	-0.034617		-0.945822	-0.006621		-0.945425	0.162151		-0.946345	0.259749		-0.952952	0.026033
-0.945518	-0.158981		-0.94514	0.027992		-0.945411	-0.036608		-0.945156	-0.007395		-0.94476	0.162415		-0.945679	0.261005		-0.952347	0.026524
-0.944852	-0.164213		-0.944474	0.027744		-0.944745	-0.037128		-0.94449	-0.008298		-0.944095	0.162775		-0.945013	0.262903		-0.951741	0.026707
-0.944187	-0.168589		-0.943809	0.02758		-0.944079	-0.037391		-0.943824	-0.008973		-0.94343	0.163127		-0.944347	0.263673		-0.951136	0.027621
-0.943521	-0.172702		-0.943143	0.028303		-0.943413	-0.039411		-0.943158	-0.009496		-0.942764	0.163836		-0.943681	0.264794		-0.95053	0.028801
-0.942855	-0.175925		-0.942478	0.028163		-0.942747	-0.041472		-0.942492	-0.010299		-0.942099	0.163967		-0.943015	0.266477		-0.949924	0.029526
-0.94219	-0.179947		-0.941812	0.028151		-0.942081	-0.042411		-0.941826	-0.011005		-0.941434	0.163839		-0.942349	0.26787		-0.949319	0.029577
-0.941524	-0.183611		-0.941146	0.028176		-0.941415	-0.042809		-0.94116	-0.011375		-0.940769	0.164141		-0.941683	0.268515		-0.948713	0.029321
-0.940859	-0.186981		-0.940481	0.027488		-0.940749	-0.043364		-0.940494	-0.012014		-0.940104	0.164396		-0.941017	0.269001		-0.948108	0.02913
-0.940193	-0.19014		-0.939815	0.028067		-0.940083	-0.044552		-0.939828	-0.012674		-0.939438	0.164034		-0.940351	0.270496		-0.947502	0.028678
-0.939528	-0.193474		-0.93915	0.028073		-0.939417	-0.04585		-0.939162	-0.013083		-0.938773	0.163856		-0.939685	0.271312		-0.946897	0.028546
-0.938862	-0.196957		-0.938484	0.028037		-0.938751	-0.047297		-0.938496	-0.01346		-0.938108	0.163899		-0.939019	0.271944		-0.946291	0.027889
-0.938197	-0.199112		-0.937819	0.027987		-0.938085	-0.04906		-0.93783	-0.014516		-0.937443	0.164021		-0.938353	0.272133		-0.945686	0.02687
-0.937531	-0.202764		-0.937153	0.028211		-0.937419	-0.050927		-0.937164	-0.015733		-0.936778	0.164721		-0.937687	0.272779		-0.94508	0.026012
-0.936866	-0.207241		-0.936488	0.029414		-0.936753	-0.051686		-0.936498	-0.016778		-0.936113	0.165438		-0.937021	0.27338		-0.944475	0.025602
-0.9362	-0.210498		-0.935822	0.0298		-0.936087	-0.052453		-0.935832	-0.017744		-0.935447	0.165999		-0.936355	0.274093		-0.943869	0.024821
-0.935535	-0.213495		-0.935156	0.029824		-0.935421	-0.053394		-0.935166	-0.01801		-0.934782	0.166183		-0.935689	0.275964		-0.943264	0.023818
-0.934869	-0.216835		-0.934491	0.028947		-0.934755	-0.054942		-0.9345	-0.01915		-0.934117	0.166582		-0.935023	0.276853		-0.942658	0.022933
-0.934204	-0.219583		-0.933825	0.027912		-0.934089	-0.055821		-0.933834	-0.020785		-0.933452	0.167294		-0.934357	0.276922		-0.942053	0.022175
-0.933538	-0.222326		-0.93316	0.027938		-0.933423	-0.056451		-0.933168	-0.021265		-0.932787	0.167834		-0.933691	0.278584		-0.941447	0.022588
-0.932872	-0.224934		-0.932494	0.028928		-0.932757	-0.057363		-0.932502	-0.021168		-0.932121	0.168893		-0.933025	0.279828		-0.940842	0.022875
-0.932207	-0.227349		-0.931829	0.029684		-0.932091	-0.058268		-0.931836	-0.021356		-0.931456	0.169968		-0.932359	0.279679		-0.940236	0.021632
-0.931541	-0.230021		-0.931163	0.029227		-0.931425	-0.05876		-0.93117	-0.022022		-0.930791	0.170639		-0.931693	0.280653		-0.939631	0.020634
-0.930876	-0.231991		-0.930498	0.029195		-0.930759	-0.059309		-0.930504	-0.022869		-0.930126	0.171537		-0.931027	0.2817		-0.939025	0.020816
-0.93021	-0.233757		-0.929832	0.029347		-0.930093	-0.060385		-0.929838	-0.023474		-0.929461	0.172462		-0.930361	0.28303		-0.93842	0.020397
-0.929545	-0.235749		-0.929167	0.029278		-0.929427	-0.061736		-0.929172	-0.023576		-0.928795	0.173121		-0.929695	0.283896		-0.937814	0.019589
-0.928879	-0.238109		-0.928501	0.029147		-0.928761	-0.062422		-0.928506	-0.023604		-0.92813	0.173697		-0.929029	0.285867		-0.937209	0.018763
-0.928214	-0.240376		-0.927835	0.028931		-0.928095	-0.063146		-0.92784	-0.024309		-0.927465	0.174322		-0.928363	0.287589		-0.936603	0.017875
-0.927548	-0.241599		-0.92717	0.029343		-0.927429	-0.06352		-0.927174	-0.025419		-0.9268	0.175162		-0.927697	0.289604		-0.935998	0.017036
-0.926883	-0.243041		-0.926504	0.029527		-0.926763	-0.065064		-0.926508	-0.025282		-0.926135	0.176266		-0.927031	0.291644		-0.935392	0.016413
-0.926217	-0.24512		-0.925839	0.028916		-0.926097	-0.065837		-0.925843	-0.024993		-0.92547	0.177		-0.926365	0.292929		-0.934787	0.015423
-0.925552	-0.245935		-0.925173	0.028979		-0.925431	-0.066631		-0.925177	-0.02588		-0.924804	0.177371		-0.925699	0.293177		-0.934181	0.014255
-0.924886	-0.245593		-0.924508	0.030053		-0.924765	-0.066427		-0.924511	-0.026564		-0.924139	0.1783		-0.925033	0.29403		-0.933576	0.013698
-0.924221	-0.246404		-0.923842	0.030835		-0.924099	-0.066446		-0.923845	-0.026715		-0.923474	0.179484		-0.924367	0.29484		-0.93297	0.01341
-0.923555	-0.246671		-0.923177	0.031272		-0.923433	-0.066948		-0.923179	-0.026298		-0.922809	0.181203		-0.923701	0.295733		-0.932365	0.013005
-0.92289	-0.246212		-0.922511	0.031482		-0.922767	-0.067122		-0.922513	-0.025021		-0.922144	0.182477		-0.923035	0.296283		-0.931759	0.012431
-0.922224	-0.246113		-0.921845	0.031714		-0.922101	-0.066104		-0.921847	-0.024652		-0.921478	0.183399		-0.922369	0.298751		-0.931154	0.01201
-0.921558	-0.246562		-0.92118	0.032613		-0.921435	-0.06557		-0.921181	-0.024451		-0.920813	0.184732		-0.921703	0.300103		-0.930548	0.011166
-0.920893	-0.246429		-0.920514	0.033695		-0.920769	-0.064378		-0.920515	-0.024258		-0.920148	0.186097		-0.921037	0.30143		-0.929943	0.009871
-0.920227	-0.246085		-0.919849	0.035285		-0.920103	-0.064015		-0.919849	-0.024606		-0.919483	0.18793		-0.920371	0.30351		-0.929337	0.008493
-0.919562	-0.244847		-0.919183	0.036285		-0.919437	-0.063466		-0.919183	-0.025076		-0.918818	0.189988		-0.919705	0.305996		-0.928732	0.00672
-0.918896	-0.243401		-0.918518	0.037017		-0.918771	-0.06294		-0.918517	-0.02513		-0.918152	0.192218		-0.919039	0.30892		-0.928126	0.00453
-0.918231	-0.242269		-0.917852	0.037135		-0.918105	-0.06233		-0.917851	-0.024806		-0.917487	0.194655		-0.918373	0.311683		-0.927521	0.003439
-0.917565	-0.240706		-0.917187	0.037037		-0.917439	-0.061326		-0.917185	-0.024762		-0.916822	0.19655		-0.917707	0.314793		-0.926915	0.002655
-0.9169	-0.238348		-0.916521	0.037825		-0.916773	-0.060391		-0.916519	-0.024665		-0.916157	0.198712		-0.917041	0.317373		-0.92631	0.002624
-0.916234	-0.236065		-0.915856	0.039251		-0.916107	-0.059045		-0.915853	-0.0234		-0.915492	0.201276		-0.916375	0.320628		-0.925704	0.001706
-0.915569	-0.232896		-0.91519	0.040301		-0.915441	-0.058033		-0.915187	-0.0219		-0.914826	0.204482		-0.915709	0.323467		-0.925099	0.000938
-0.914903	-0.230314		-0.914524	0.0413		-0.914775	-0.057424		-0.914521	-0.020102		-0.914161	0.20827		-0.915043	0.326253		-0.924493	0.000117
-0.914238	-0.227996		-0.913859	0.042791		-0.914109	-0.056727		-0.913855	-0.017859		-0.913496	0.211608		-0.914377	0.33044		-0.923888	-0.000163
-0.913572	-0.224062		-0.913193	0.044645		-0.913443	-0.055348		-0.913189	-0.014987		-0.912831	0.216258		-0.913711	0.334803		-0.923282	0.000141
-0.912907	-0.21973		-0.912528	0.046184		-0.912777	-0.053709		-0.912523	-0.012823		-0.912166	0.221753		-0.913045	0.33922		-0.922677	0.000558
-0.912241	-0.214738		-0.911862	0.047823		-0.912111	-0.052295		-0.911857	-0.010361		-0.911501	0.227451		-0.912379	0.342909		-0.922071	0.000282
-0.911575	-0.208561		-0.911197	0.050108		-0.911445	-0.050784		-0.911191	-0.008478		-0.910835	0.233561		-0.911713	0.347127		-0.921466	-0.001064
-0.91091	-0.203017		-0.910531	0.052211		-0.910779	-0.04923		-0.910525	-0.006807		-0.91017	0.239953		-0.911047	0.35253		-0.92086	-0.000404
-0.910244	-0.196901		-0.909866	0.054026		-0.910113	-0.046788		-0.909859	-0.003333		-0.909505	0.247617		-0.910381	0.358367		-0.920255	-0.000729
-0.909579	-0.19048		-0.9092	0.05645		-0.909447	-0.044402		-0.909193	0.000738		-0.90884	0.257223		-0.909715	0.363471		-0.919649	-0.000689
-0.908913	-0.183527		-0.908535	0.058915		-0.908781	-0.042327		-0.908527	0.004894		-0.908175	0.267534		-0.909049	0.369756		-0.919044	-0.000649
-0.908248	-0.17506		-0.907869	0.061547		-0.908115	-0.03989		-0.907861	0.009661		-0.907509	0.278634		-0.908383	0.3771		-0.918438	7.9e-05
-0.907582	-0.165837		-0.907203	0.064851		-0.907449	-0.037541		-0.907195	0.015228		-0.906844	0.291153		-0.907717	0.384948		-0.917833	0.000236
-0.906917	-0.155866		-0.906538	0.068492		-0.906783	-0.034712		-0.906529	0.021986		-0.906179	0.30584		-0.907051	0.391844		-0.917227	0.000649
-0.906251	-0.144649		-0.905872	0.073329		-0.906117	-0.031894		-0.905863	0.028017		-0.905514	0.322298		-0.906385	0.40004		-0.916622	0.001583
-0.905586	-0.132765		-0.905207	0.078327		-0.905451	-0.027777		-0.905197	0.035407		-0.904849	0.34138		-0.905719	0.409604		-0.916016	0.002799
-0.90492	-0.119895		-0.904541	0.082876		-0.904785	-0.023281		-0.904531	0.044266		-0.904183	0.361974		-0.905053	0.419222		-0.915411	0.004554
-0.904255	-0.10524		-0.903876	0.088002		-0.904119	-0.018626		-0.903865	0.053334		-0.903518	0.383522		-0.904387	0.429448		-0.914805	0.006919
-0.903589	-0.089244		-0.90321	0.093752		-0.903453	-0.013778		-0.903199	0.063254		-0.902853	0.407299		-0.903721	0.439407		-0.9142	0.008728
-0.902924	-0.072537		-0.902545	0.100356		-0.902787	-0.008575		-0.902533	0.074385		-0.902188	0.433823		-0.903055	0.4511		-0.913594	0.010779
-0.902258	-0.055891		-0.901879	0.107517		-0.902121	-0.002766		-0.901867	0.085709		-0.901523	0.461987		-0.902389	0.46357		-0.912989	0.01316
-0.901593	-0.038143		-0.901213	0.115407		-0.901455	0.00312		-0.901201	0.098187		-0.900858	0.49294		-0.901723	0.475813		-0.912383	0.015327
-0.900927	-0.018982		-0.900548	0.124033		-0.900789	0.009154		-0.900535	0.111066		-0.900192	0.526276		-0.901057	0.490654		-0.911778	0.018046
-0.900261	0.001665		-0.899882	0.132114		-0.900123	0.015672		-0.899869	0.124592		-0.899527	0.562393		-0.900391	0.504375		-0.911172	0.020307
-0.899596	0.022821		-0.899217	0.139402		-0.899457	0.022057		-0.899203	0.13793		-0.898862	0.600503		-0.899725	0.519636		-0.910567	0.022922
-0.89893	0.045427		-0.898551	0.147666		-0.898791	0.029049		-0.898537	0.151507		-0.898197	0.641203		-0.899059	0.535779		-0.909961	0.026929
-0.898265	0.068748		-0.897886	0.157021		-0.898125	0.036251		-0.897871	0.16729		-0.897532	0.684784		-0.898393	0.551422		-0.909356	0.030904
-0.897599	0.092942		-0.89722	0.166441		-0.897459	0.044351		-0.897205	0.183641		-0.896866	0.730233		-0.897727	0.568149		-0.90875	0.034317
-0.896934	0.116927		-0.896555	0.176549		-0.896793	0.053813		-0.896539	0.201327		-0.896201	0.778358		-0.897061	0.584953		-0.908145	0.038033
-0.896268	0.142797		-0.895889	0.188035		-0.896127	0.063853		-0.895873	0.21892		-0.895536	0.829565		-0.896395	0.602011		-0.907539	0.041967
-0.895603	0.16982		-0.895223	0.199465		-0.895461	0.073432		-0.895207	0.236851		-0.894871	0.883171		-0.895729	0.617858		-0.906934	0.047164
-0.894937	0.196995		-0.894558	0.211475		-0.894795	0.083238		-0.894542	0.255373		-0.894206	0.938313		-0.895063	0.634225		-0.906328	0.052706
-0.894272	0.224212		-0.893892	0.223385		-0.894129	0.094187		-0.893875	0.274369		-0.89354	0.994869		-0.894397	0.652279		-0.905723	0.058517
-0.893606	0.252239		-0.893227	0.236528		-0.893463	0.105275		-0.89321	0.293398		-0.892875	1.05409		-0.893731	0.67241		-0.905117	0.064693
-0.892941	0.281082		-0.892561	0.249709		-0.892797	0.11601		-0.892544	0.312974		-0.89221	1.11476		-0.893065	0.692461		-0.904512	0.070926
-0.892275	0.309209		-0.891896	0.263542		-0.892131	0.127173		-0.891878	0.332771		-0.891545	1.17633		-0.892399	0.713196		-0.903906	0.077823
-0.89161	0.336508		-0.89123	0.276832		-0.891465	0.138297		-0.891212	0.352205		-0.89088	1.23853		-0.891733	0.734299		-0.903301	0.085378
-0.890944	0.364381		-0.890565	0.289325		-0.890799	0.149716		-0.890546	0.371357		-0.890215	1.3021		-0.891068	0.756069		-0.902695	0.093814
-0.890279	0.392701		-0.889899	0.302663		-0.890133	0.161139		-0.88988	0.390831		-0.889549	1.36586		-0.890401	0.77806		-0.90209	0.103062
-0.889613	0.42133		-0.889234	0.316452		-0.889467	0.172424		-0.889214	0.409801		-0.888884	1.43104		-0.889735	0.80015		-0.901484	0.112587
-0.888947	0.44939		-0.888568	0.329857		-0.888801	0.183589		-0.888548	0.42895		-0.888219	1.49693		-0.889069	0.821201		-0.900879	0.122374
-0.888282	0.476835		-0.887902	0.344051		-0.888135	0.194621		-0.887882	0.449495		-0.887554	1.56309		-0.888403	0.842478		-0.900273	0.133453
-0.887616	0.504055		-0.887237	0.357826		-0.887469	0.205706		-0.887216	0.469677		-0.886889	1.62995		-0.887738	0.864314		-0.899668	0.145796
-0.886951	0.531661		-0.886571	0.371663		-0.886803	0.217406		-0.88655	0.48936		-0.886223	1.69659		-0.887071	0.885955		-0.899062	0.158146
-0.886285	0.559451		-0.885906	0.385583		-0.886137	0.228564		-0.885884	0.508811		-0.885558	1.76324		-0.886405	0.906272		-0.898457	0.171937
-0.88562	0.586827		-0.88524	0.399344		-0.885471	0.23935		-0.885218	0.527641		-0.884893	1.82985		-0.885739	0.926591		-0.897851	0.186259
-0.884954	0.613528		-0.884575	0.41288		-0.884806	0.249535		-0.884552	0.546472		-0.884228	1.89662		-0.885073	0.946875		-0.897246	0.202398
-0.884289	0.63879		-0.883909	0.426633		-0.88414	0.260037		-0.883886	0.565395		-0.883563	1.96326		-0.884407	0.967169		-0.89664	0.219688
-0.883623	0.66392		-0.883244	0.440014		-0.883474	0.271069		-0.88322	0.583189		-0.882897	2.02923		-0.883741	0.987121		-0.896035	0.2379
-0.882958	0.689446		-0.882578	0.452989		-0.882807	0.281329		-0.882554	0.600222		-0.882232	2.0934		-0.883075	1.00693		-0.895429	0.257862
-0.882292	0.714193		-0.881913	0.465625		-0.882142	0.291875		-0.881888	0.616766		-0.881567	2.1574		-0.882409	1.02699		-0.894824	0.279279
-0.881627	0.738595		-0.881247	0.47845		-0.881476	0.303187		-0.881222	0.632659		-0.880902	2.22108		-0.881743	1.04727		-0.894218	0.301316
-0.880961	0.761781		-0.880581	0.490403		-0.88081	0.313502		-0.880556	0.64822		-0.880237	2.2841		-0.881077	1.06677		-0.893613	0.324632
-0.880296	0.783402		-0.879916	0.500882		-0.880144	0.32313		-0.87989	0.662961		-0.879571	2.34529		-0.880412	1.08513		-0.893007	0.348301
-0.87963	0.804651		-0.87925	0.511643		-0.879478	0.332361		-0.879224	0.677679		-0.878906	2.40525		-0.879745	1.10186		-0.892402	0.374889
-0.878964	0.825093		-0.878585	0.522697		-0.878812	0.340802		-0.878558	0.692656		-0.878241	2.46469		-0.879079	1.11894		-0.891796	0.401546
-0.878299	0.844992		-0.877919	0.533509		-0.878146	0.348993		-0.877892	0.707312		-0.877576	2.52256		-0.878413	1.13614		-0.891191	0.428548
-0.877633	0.864216		-0.877254	0.545077		-0.87748	0.357647		-0.877226	0.721718		-0.876911	2.57902		-0.877747	1.15142		-0.890585	0.455086
-0.876968	0.882699		-0.876588	0.556673		-0.876814	0.3665		-0.87656	0.734709		-0.876245	2.63231		-0.877082	1.16586		-0.88998	0.481459
-0.876302	0.900249		-0.875923	0.567091		-0.876148	0.37461		-0.875894	0.746518		-0.87558	2.68343		-0.876415	1.18054		-0.889374	0.508516
-0.875637	0.917159		-0.875257	0.577352		-0.875482	0.38166		-0.875228	0.757508		-0.874915	2.73333		-0.875749	1.19464		-0.888769	0.537847
-0.874971	0.931854		-0.874591	0.587786		-0.874816	0.388267		-0.874562	0.767844		-0.87425	2.78122		-0.875084	1.2081		-0.888163	0.571095
-0.874306	0.945409		-0.873926	0.597954		-0.87415	0.394757		-0.873896	0.777462		-0.873585	2.82688		-0.874417	1.21998		-0.887558	0.604152
-0.87364	0.957961		-0.87326	0.607385		-0.873484	0.401995		-0.87323	0.785543		-0.87292	2.87095		-0.873752	1.23242		-0.886952	0.638864
-0.872975	0.968623		-0.872595	0.615352		-0.872818	0.409406		-0.872564	0.793487		-0.872254	2.91228		-0.873085	1.24384		-0.886347	0.674014
-0.872309	0.978194		-0.871929	0.622417		-0.872152	0.41537		-0.871898	0.80084		-0.871589	2.94911		-0.872419	1.25438		-0.885741	0.709755
-0.871644	0.987164		-0.871264	0.629764		-0.871486	0.421247		-0.871232	0.806178		-0.870924	2.9839		-0.871754	1.26404		-0.885136	0.744998
-0.870978	0.994384		-0.870598	0.63721		-0.87082	0.427403		-0.870566	0.810379		-0.870259	3.01634		-0.871087	1.27191		-0.88453	0.781013
-0.870313	1.00071		-0.869933	0.643446		-0.870154	0.43154		-0.8699	0.814081		-0.869594	3.04587		-0.870422	1.2804		-0.883925	0.817318
-0.869647	1.0051		-0.869267	0.648116		-0.869488	0.43581		-0.869234	0.816719		-0.868928	3.07196		-0.869756	1.28703		-0.883319	0.852714
-0.868981	1.00889		-0.868602	0.652665		-0.868822	0.439108		-0.868568	0.818287		-0.868263	3.09438		-0.869089	1.29187		-0.882714	0.888187
-0.868316	1.01132		-0.867936	0.657492		-0.868156	0.442479		-0.867902	0.819537		-0.867598	3.11327		-0.868423	1.29736		-0.882108	0.924596
-0.86765	1.01206		-0.86727	0.661086		-0.86749	0.445749		-0.867236	0.818879		-0.866933	3.12867		-0.867757	1.30061		-0.881503	0.959438
-0.866985	1.01013		-0.866605	0.664078		-0.866824	0.447852		-0.86657	0.816021		-0.866268	3.1403		-0.867091	1.30323		-0.880897	0.995634
-0.866319	1.00798		-0.865939	0.667435		-0.866158	0.451016		-0.865904	0.813397		-0.865602	3.1488		-0.866426	1.30521		-0.880292	1.03183
-0.865654	1.00389		-0.865274	0.670107		-0.865492	0.452582		-0.865238	0.810484		-0.864937	3.1539		-0.865759	1.30685		-0.879686	1.06711
-0.864988	0.99825		-0.864608	0.671895		-0.864826	0.454045		-0.864572	0.807144		-0.864272	3.15552		-0.865093	1.30843		-0.879081	1.10315
-0.864323	0.990919		-0.863943	0.67274		-0.86416	0.453946		-0.863906	0.8021		-0.863607	3.15464		-0.864428	1.30865		-0.878475	1.13823
-0.863657	0.984556		-0.863277	0.673162		-0.863494	0.453105		-0.86324	0.795614		-0.862942	3.15152		-0.863761	1.30811		-0.87787	1.17286
-0.862992	0.976088		-0.862612	0.672783		-0.862828	0.451499		-0.862574	0.788349		-0.862277	3.14482		-0.863096	1.30692		-0.877264	1.20768
-0.862326	0.965087		-0.861946	0.671415		-0.862162	0.449499		-0.861908	0.780598		-0.861611	3.13577		-0.862429	1.30448		-0.876659	1.24172
-0.861661	0.954257		-0.86128	0.669804		-0.861496	0.447769		-0.861243	0.773056		-0.860946	3.12322		-0.861763	1.30204		-0.876053	1.27457
-0.860995	0.942118		-0.860615	0.668549		-0.86083	0.444703		-0.860577	0.764768		-0.860281	3.10789		-0.861098	1.29813		-0.875448	1.3078
-0.86033	0.929103		-0.859949	0.666384		-0.860164	0.441988		-0.859911	0.75549		-0.859616	3.09043		-0.860431	1.29291		-0.874842	1.34058
-0.859664	0.915896		-0.859284	0.663152		-0.859498	0.438811		-0.859245	0.74552		-0.858951	3.06995		-0.859766	1.28776		-0.874237	1.37207
-0.858999	0.902063		-0.858618	0.659066		-0.858832	0.435091		-0.858579	0.736152		-0.858285	3.04763		-0.8591	1.28155		-0.873631	1.4025
-0.858333	0.887978		-0.857953	0.654577		-0.858166	0.430758		-0.857913	0.726985		-0.85762	3.02319		-0.858433	1.27496		-0.873026	1.43249
-0.857667	0.873516		-0.857287	0.650728		-0.8575	0.426198		-0.857247	0.717514		-0.856955	2.99662		-0.857768	1.26838		-0.87242	1.4606
-0.857002	0.857701		-0.856622	0.646933		-0.856834	0.421083		-0.856581	0.707261		-0.85629	2.96906		-0.857102	1.26142		-0.871815	1.48803
-0.856336	0.840509		-0.855956	0.64323		-0.856168	0.416253		-0.855915	0.696901		-0.855625	2.93858		-0.856436	1.25368		-0.871209	1.51558
-0.855671	0.823707		-0.855291	0.639256		-0.855502	0.410839		-0.855249	0.686256		-0.854959	2.90749		-0.85577	1.24642		-0.870604	1.54244
-0.855005	0.806623		-0.854625	0.634208		-0.854836	0.405756		-0.854583	0.6748		-0.854294	2.87523		-0.855103	1.23839		-0.869998	1.56804
-0.85434	0.791048		-0.853959	0.629699		-0.85417	0.401048		-0.853917	0.663517		-0.853629	2.84172		-0.854438	1.23041		-0.869393	1.5923
-0.853674	0.773466		-0.853294	0.625312		-0.853504	0.395929		-0.853251	0.652887		-0.852964	2.80554		-0.853772	1.223		-0.868787	1.61503
-0.853009	0.75615		-0.852628	0.619969		-0.852838	0.391339		-0.852585	0.642288		-0.852299	2.76976		-0.853106	1.21514		-0.868182	1.63676
-0.852343	0.738033		-0.851963	0.61491		-0.852172	0.38742		-0.851919	0.632007		-0.851634	2.73317		-0.85244	1.20663		-0.867576	1.65822
-0.851678	0.720035		-0.851297	0.610248		-0.851506	0.382657		-0.851253	0.621424		-0.850968	2.69655		-0.851774	1.1981		-0.866971	1.67806
-0.851012	0.703162		-0.850632	0.605251		-0.85084	0.377927		-0.850587	0.610904		-0.850303	2.65949		-0.851107	1.1897		-0.866365	1.69604
-0.850347	0.686759		-0.849966	0.600323		-0.850174	0.373051		-0.849921	0.600414		-0.849638	2.62191		-0.850442	1.18236		-0.86576	1.71334
-0.849681	0.668818		-0.849301	0.595026		-0.849508	0.36781		-0.849255	0.589889		-0.848973	2.58509		-0.849775	1.17371		-0.865154	1.73003
-0.849016	0.650903		-0.848635	0.589827		-0.848842	0.362347		-0.848589	0.579636		-0.848308	2.54799		-0.84911	1.16486		-0.864549	1.74541
-0.84835	0.633521		-0.847969	0.585202		-0.848176	0.35583		-0.847923	0.569813		-0.847642	2.50929		-0.848444	1.15643		-0.863943	1.75891
-0.847685	0.615778		-0.847304	0.580596		-0.84751	0.350379		-0.847257	0.560871		-0.846977	2.47106		-0.847777	1.14729		-0.863338	1.77108
-0.847019	0.600391		-0.846638	0.577015		-0.846844	0.346028		-0.846591	0.552643		-0.846312	2.43334		-0.847112	1.13979		-0.862732	1.78197
-0.846353	0.585113		-0.845973	0.573024		-0.846178	0.341376		-0.845925	0.544401		-0.845647	2.39533		-0.846446	1.13263		-0.862127	1.79057
-0.845688	0.569154		-0.845307	0.569236		-0.845512	0.337519		-0.845259	0.535223		-0.844982	2.35709		-0.84578	1.12564		-0.861521	1.79703
-0.845022	0.552279		-0.844642	0.565568		-0.844846	0.333796		-0.844593	0.525401		-0.844316	2.3194		-0.845114	1.11845		-0.860916	1.80266
-0.844357	0.536191		-0.843976	0.561342		-0.84418	0.329262		-0.843927	0.516095		-0.843651	2.28239		-0.844447	1.11204		-0.86031	1.80604
-0.843691	0.520031		-0.843311	0.556684		-0.843514	0.32515		-0.843261	0.506657		-0.842986	2.24537		-0.843782	1.10514		-0.859705	1.80838
-0.843026	0.503523		-0.842645	0.552493		-0.842848	0.321214		-0.842595	0.498062		-0.842321	2.20932		-0.843116	1.09908		-0.859099	1.80788
-0.84236	0.487258		-0.84198	0.548372		-0.842182	0.317418		-0.841929	0.489497		-0.841656	2.17351		-0.84245	1.09261		-0.858494	1.80659
-0.841695	0.471302		-0.841314	0.543798		-0.841516	0.312641		-0.841263	0.481515		-0.840991	2.13844		-0.841784	1.08725		-0.857888	1.80375
-0.841029	0.456836		-0.840648	0.53904		-0.84085	0.30815		-0.840597	0.473689		-0.840325	2.10332		-0.841118	1.08181		-0.857283	1.79923
-0.840364	0.441253		-0.839983	0.534399		-0.840184	0.303904		-0.839931	0.466049		-0.83966	2.06886		-0.840452	1.07573		-0.856677	1.79325
-0.839698	0.427079		-0.839317	0.530406		-0.839518	0.299849		-0.839265	0.457963		-0.838995	2.03261		-0.839786	1.06952		-0.856072	1.78617
-0.839033	0.412278		-0.838652	0.527156		-0.838852	0.29618		-0.838599	0.449556		-0.83833	1.99949		-0.83912	1.06317		-0.855466	1.7781
-0.838367	0.397822		-0.837986	0.523491		-0.838186	0.292778		-0.837933	0.442304		-0.837665	1.9665		-0.838454	1.05708		-0.854861	1.76851
-0.837702	0.383784		-0.837321	0.51925		-0.83752	0.289321		-0.837267	0.435597		-0.836999	1.9344		-0.837788	1.05246		-0.854255	1.75721
-0.837036	0.370004		-0.836655	0.515215		-0.836854	0.286476		-0.836601	0.428923		-0.836334	1.90163		-0.837121	1.04702		-0.85365	1.74477
-0.83637	0.356932		-0.83599	0.512344		-0.836188	0.283087		-0.835935	0.421699		-0.835669	1.86883		-0.836456	1.04136		-0.853044	1.73162
-0.835705	0.3438		-0.835324	0.509023		-0.835522	0.279394		-0.835269	0.41468		-0.835004	1.83792		-0.83579	1.03629		-0.852439	1.71705
-0.835039	0.330738		-0.834659	0.505314		-0.834856	0.275812		-0.834603	0.40793		-0.834339	1.80754		-0.835124	1.03154		-0.851833	1.7026
-0.834374	0.318395		-0.833993	0.502154		-0.83419	0.272262		-0.833937	0.401877		-0.833673	1.77773		-0.834458	1.02738		-0.851228	1.68741
-0.833708	0.306658		-0.833327	0.498762		-0.833524	0.268922		-0.833271	0.396476		-0.833008	1.74825		-0.833791	1.02304		-0.850622	1.67175
-0.833043	0.295361		-0.832662	0.494685		-0.832858	0.265549		-0.832605	0.390512		-0.832343	1.71916		-0.833126	1.01859		-0.850017	1.6558
-0.832377	0.284143		-0.831996	0.490825		-0.832192	0.262468		-0.831939	0.384896		-0.831678	1.69112		-0.83246	1.01349		-0.849411	1.63884
-0.831712	0.273554		-0.831331	0.487521		-0.831526	0.259552		-0.831273	0.378834		-0.831013	1.66418		-0.831794	1.00864		-0.848806	1.62075
-0.831046	0.263334		-0.830665	0.485238		-0.83086	0.257482		-0.830607	0.372859		-0.830347	1.63705		-0.831128	1.00392		-0.8482	1.60255
-0.830381	0.252858		-0.83	0.482066		-0.830194	0.255246		-0.829942	0.367811		-0.829682	1.61021		-0.830462	0.999116		-0.847595	1.58431
-0.829715	0.242953		-0.829334	0.478862		-0.829528	0.252836		-0.829275	0.362918		-0.829017	1.58487		-0.829796	0.994387		-0.846989	1.56551
-0.82905	0.233273		-0.828669	0.476163		-0.828862	0.250573		-0.82861	0.357784		-0.828352	1.55902		-0.82913	0.990374		-0.846384	1.54707
-0.828384	0.223896		-0.828003	0.47284		-0.828196	0.247969		-0.827944	0.352148		-0.827687	1.53267		-0.828464	0.98656		-0.845778	1.52744
-0.827719	0.215159		-0.827337	0.469681		-0.82753	0.244949		-0.827278	0.346924		-0.827022	1.50774		-0.827798	0.982999		-0.845173	1.50889
-0.827053	0.205683		-0.826672	0.46704		-0.826864	0.242674		-0.826612	0.342551		-0.826356	1.48243		-0.827132	0.979432		-0.844567	1.4898
-0.826388	0.196489		-0.826006	0.464455		-0.826198	0.240601		-0.825946	0.33802		-0.825691	1.45836		-0.826466	0.976048		-0.843962	1.47082
-0.825722	0.187167		-0.825341	0.461803		-0.825532	0.238241		-0.82528	0.332894		-0.825026	1.43531		-0.8258	0.973774		-0.843356	1.45188
-0.825056	0.17795		-0.824675	0.459708		-0.824866	0.236435		-0.824614	0.327809		-0.824361	1.41247		-0.825134	0.971713		-0.842751	1.43316
-0.824391	0.169012		-0.82401	0.457656		-0.8242	0.234492		-0.823948	0.323206		-0.823696	1.38962		-0.824468	0.969179		-0.842145	1.4144
-0.823725	0.160935		-0.823344	0.455061		-0.823534	0.232741		-0.823282	0.318966		-0.82303	1.36743		-0.823802	0.966211		-0.84154	1.39507
-0.82306	0.153297		-0.822679	0.452079		-0.822868	0.231291		-0.822616	0.314834		-0.822365	1.34534		-0.823136	0.964209		-0.840934	1.37576
-0.822394	0.145321		-0.822013	0.449125		-0.822202	0.229711		-0.82195	0.310239		-0.8217	1.32327		-0.82247	0.961669		-0.840329	1.35723
-0.821729	0.13844		-0.821347	0.446818		-0.821536	0.227929		-0.821284	0.305717		-0.821035	1.30239		-0.821804	0.958957		-0.839723	1.33917
-0.821063	0.130895		-0.820682	0.444261		-0.82087	0.225509		-0.820618	0.301684		-0.82037	1.28326		-0.821138	0.956432		-0.839118	1.32089
-0.820398	0.123434		-0.820016	0.441438		-0.820204	0.223366		-0.819952	0.297659		-0.819704	1.26487		-0.820472	0.953723		-0.838512	1.30313
-0.819732	0.114812		-0.819351	0.439261		-0.819538	0.220491		-0.819286	0.293563		-0.819039	1.24562		-0.819806	0.951797		-0.837907	1.28603
-0.819067	0.108324		-0.818685	0.438256		-0.818873	0.217166		-0.81862	0.289563		-0.818374	1.22726		-0.81914	0.950082		-0.837301	1.26868
-0.818401	0.102309		-0.81802	0.436194		-0.818207	0.215689		-0.817954	0.285645		-0.817709	1.20883		-0.818474	0.948106		-0.836696	1.25221
-0.817736	0.096084		-0.817354	0.434113		-0.817541	0.21297		-0.817288	0.28193		-0.817044	1.1903		-0.817808	0.945509		-0.83609	1.23654
-0.81707	0.088998		-0.816689	0.431625		-0.816875	0.210485		-0.816622	0.279112		-0.816379	1.17175		-0.817142	0.942794		-0.835485	1.21968
-0.816405	0.082386		-0.816023	0.429203		-0.816209	0.208811		-0.815956	0.27626		-0.815713	1.15349		-0.816476	0.940872		-0.834879	1.20278
-0.815739	0.076049		-0.815358	0.427792		-0.815543	0.207796		-0.81529	0.272842		-0.815048	1.13555		-0.81581	0.939335		-0.834274	1.18609
-0.815073	0.069382		-0.814692	0.42627		-0.814877	0.206914		-0.814624	0.269319		-0.814383	1.11921		-0.815144	0.937791		-0.833668	1.16904
-0.814408	0.062665		-0.814026	0.42354		-0.814211	0.206245		-0.813958	0.265681		-0.813718	1.10298		-0.814478	0.935849		-0.833063	1.15197
-0.813742	0.055365		-0.813361	0.420426		-0.813545	0.202709		-0.813292	0.261878		-0.813053	1.08652		-0.813812	0.933622		-0.832457	1.13567
-0.813077	0.047309		-0.812695	0.417936		-0.812879	0.200524		-0.812626	0.257736		-0.812387	1.07027		-0.813146	0.932498		-0.831852	1.11955
-0.812411	0.039079		-0.81203	0.416532		-0.812213	0.197798		-0.81196	0.254201		-0.811722	1.0553		-0.81248	0.931206		-0.831246	1.10322
-0.811746	0.032544		-0.811364	0.414361		-0.811547	0.194962		-0.811294	0.251094		-0.811057	1.04056		-0.811814	0.929345		-0.830641	1.0873
-0.81108	0.025621		-0.810699	0.411982		-0.810881	0.19315		-0.810628	0.247881		-0.810392	1.02721		-0.811148	0.928232		-0.830035	1.07191
-0.810415	0.018394		-0.810033	0.409791		-0.810215	0.191476		-0.809962	0.244261		-0.809727	1.01455		-0.810482	0.927274		-0.82943	1.05635
-0.809749	0.011997		-0.809368	0.407664		-0.809549	0.189226		-0.809296	0.240762		-0.809061	1.00117		-0.809816	0.925482		-0.828824	1.04208
-0.809084	0.005794		-0.808702	0.405519		-0.808883	0.187116		-0.80863	0.237839		-0.808396	0.986869		-0.80915	0.924628		-0.828219	1.02803
-0.808418	0.000125		-0.808037	0.40358		-0.808217	0.186284		-0.807964	0.234552		-0.807731	0.974902		-0.808484	0.923105		-0.827613	1.01344
-0.807753	-0.006491		-0.807371	0.401386		-0.807551	0.185507		-0.807298	0.231219		-0.807066	0.960858		-0.807818	0.923014		-0.827008	0.999586
-0.807087	-0.012313		-0.806705	0.399147		-0.806885	0.183255		-0.806632	0.228062		-0.806401	0.946997		-0.807152	0.922171		-0.826402	0.985808
-0.806422	-0.019238		-0.80604	0.397348		-0.806219	0.180945		-0.805966	0.225036		-0.805735	0.93467		-0.806486	0.921444		-0.825796	0.972511
-0.805756	-0.025812		-0.805374	0.394565		-0.805553	0.179162		-0.8053	0.222413		-0.80507	0.921799		-0.80582	0.920686		-0.825191	0.959549
-0.805091	-0.032146		-0.804709	0.391873		-0.804887	0.177264		-0.804634	0.220381		-0.804405	0.909242		-0.805154	0.9209		-0.824585	0.946921
-0.804425	-0.038151		-0.804043	0.389979		-0.804221	0.175388		-0.803968	0.21758		-0.80374	0.895933		-0.804488	0.919644		-0.82398	0.934172
-0.803759	-0.043409		-0.803378	0.387592		-0.803555	0.172958		-0.803302	0.214587		-0.803075	0.883384		-0.803822	0.919067		-0.823375	0.921433
-0.803094	-0.049643		-0.802712	0.38486		-0.802889	0.17098		-0.802636	0.212503		-0.80241	0.87233		-0.803156	0.91896		-0.822769	0.909565
-0.802428	-0.054619		-0.802047	0.383447		-0.802223	0.169909		-0.80197	0.211032		-0.801744	0.860545		-0.80249	0.918883		-0.822164	0.89733
-0.801763	-0.061272		-0.801381	0.382119		-0.801557	0.168206		-0.801304	0.209196		-0.801079	0.850545		-0.801824	0.917925		-0.821558	0.885046
-0.801097	-0.066667		-0.800715	0.379962		-0.800891	0.167205		-0.800638	0.206224		-0.800414	0.838718		-0.801158	0.917116		-0.820953	0.873022
-0.800432	-0.072468		-0.80005	0.37811		-0.800225	0.166372		-0.799972	0.203474		-0.799749	0.828802		-0.800492	0.916135		-0.820347	0.861749
-0.799766	-0.078173		-0.799384	0.376784		-0.799559	0.165139		-0.799306	0.200653		-0.799084	0.818169		-0.799826	0.915489		-0.819741	0.85015
-0.799101	-0.084444		-0.798719	0.375122		-0.798893	0.163006		-0.79864	0.19796		-0.798418	0.807635		-0.79916	0.91526		-0.819136	0.839303
-0.798435	-0.090394		-0.798053	0.372966		-0.798227	0.16038		-0.797974	0.195929		-0.797753	0.797047		-0.798494	0.91487		-0.81853	0.828577
-0.79777	-0.096675		-0.797388	0.370605		-0.797561	0.157812		-0.797309	0.193796		-0.797088	0.78721		-0.797828	0.91539		-0.817925	0.817382
-0.797104	-0.103558		-0.796722	0.368117		-0.796895	0.155954		-0.796643	0.191252		-0.796423	0.778164		-0.797162	0.915342		-0.81732	0.806052
-0.796439	-0.109471		-0.796057	0.365708		-0.796229	0.154085		-0.795977	0.188597		-0.795758	0.768101		-0.796496	0.915205		-0.816714	0.795095
-0.795773	-0.115852		-0.795391	0.362863		-0.795563	0.152984		-0.795311	0.18628		-0.795092	0.757858		-0.79583	0.915292		-0.816108	0.784545
-0.795108	-0.121736		-0.794725	0.360812		-0.794897	0.15274		-0.794645	0.1841		-0.794427	0.748626		-0.795164	0.915403		-0.815503	0.774446
-0.794442	-0.128052		-0.79406	0.359441		-0.794231	0.152662		-0.793979	0.182092		-0.793762	0.739904		-0.794498	0.914983		-0.814897	0.764994
-0.793777	-0.132549		-0.793394	0.357085		-0.793565	0.151266		-0.793313	0.180177		-0.793097	0.731478		-0.793832	0.914855		-0.814292	0.755304
-0.793111	-0.138003		-0.792729	0.354823		-0.792899	0.15029		-0.792647	0.178089		-0.792432	0.722477		-0.793166	0.91529		-0.813686	0.745726
-0.792445	-0.144103		-0.792063	0.352941		-0.792233	0.149022		-0.791981	0.176062		-0.791767	0.713712		-0.7925	0.914616		-0.813081	0.736034
-0.79178	-0.149734		-0.791398	0.35026		-0.791567	0.1469		-0.791315	0.174435		-0.791101	0.704136		-0.791834	0.9139		-0.812475	0.727158
-0.791114	-0.155061		-0.790732	0.347273		-0.790901	0.145356		-0.790649	0.171972		-0.790436	0.695088		-0.791168	0.913221		-0.81187	0.717172
-0.790449	-0.160846		-0.790067	0.344724		-0.790235	0.14478		-0.789983	0.169624		-0.789771	0.686556		-0.790502	0.913161		-0.811264	0.707406
-0.789783	-0.16635		-0.789401	0.342986		-0.789569	0.142762		-0.789317	0.167364		-0.789106	0.679316		-0.789836	0.911999		-0.810659	0.698227
-0.789118	-0.170899		-0.788736	0.340933		-0.788903	0.141238		-0.788651	0.166093		-0.788441	0.672783		-0.78917	0.912582		-0.810053	0.68933
-0.788452	-0.176445		-0.78807	0.33849		-0.788237	0.140248		-0.787985	0.165165		-0.787775	0.666178		-0.788504	0.913466		-0.809448	0.680495
-0.787787	-0.181548		-0.787404	0.336073		-0.787571	0.139734		-0.787319	0.163328		-0.78711	0.657742		-0.787838	0.914392		-0.808842	0.671054
-0.787121	-0.186056		-0.786739	0.333561		-0.786905	0.138402		-0.786653	0.16103		-0.786445	0.64939		-0.787172	0.915322		-0.808237	0.662359
-0.786456	-0.189602		-0.786073	0.330778		-0.786239	0.137653		-0.785987	0.158411		-0.78578	0.642298		-0.786506	0.915743		-0.807631	0.654942
-0.78579	-0.194199		-0.785408	0.327578		-0.785573	0.13692		-0.785321	0.156464		-0.785115	0.634878		-0.78584	0.915948		-0.807026	0.647427
-0.785125	-0.199366		-0.784742	0.324723		-0.784907	0.135556		-0.784655	0.154606		-0.784449	0.627298		-0.785174	0.916734		-0.80642	0.638763
-0.784459	-0.205239		-0.784077	0.322201		-0.784241	0.135036		-0.783989	0.152474		-0.783784	0.620089		-0.784508	0.917788		-0.805815	0.630783
-0.783794	-0.210916		-0.783411	0.319737		-0.783575	0.133914		-0.783323	0.150189		-0.783119	0.612491		-0.783842	0.918799		-0.805209	0.62306
-0.783128	-0.216627		-0.782746	0.317402		-0.782909	0.132735		-0.782657	0.147199		-0.782454	0.604895		-0.783176	0.91979		-0.804604	0.614813
-0.782462	-0.221137		-0.78208	0.314979		-0.782243	0.131717		-0.781991	0.145811		-0.781789	0.598736		-0.78251	0.920506		-0.803998	0.607523
-0.781797	-0.226074		-0.781415	0.312497		-0.781577	0.13057		-0.781325	0.144266		-0.781124	0.592567		-0.781844	0.920454		-0.803393	0.600683
-0.781131	-0.230323		-0.780749	0.310407		-0.780911	0.12911		-0.780659	0.142484		-0.780458	0.585184		-0.781178	0.921293		-0.802787	0.593345
-0.780466	-0.235376		-0.780083	0.308561		-0.780245	0.128993		-0.779993	0.140856		-0.779793	0.577863		-0.780512	0.922779		-0.802182	0.586569
-0.7798	-0.239484		-0.779418	0.306072		-0.779579	0.128537		-0.779327	0.139486		-0.779128	0.571953		-0.779846	0.922815		-0.801576	0.579751
-0.779135	-0.243267		-0.778752	0.303291		-0.778913	0.127533		-0.778661	0.138276		-0.778463	0.565894		-0.77918	0.923202		-0.800971	0.572795
-0.778469	-0.248409		-0.778087	0.300743		-0.778247	0.126731		-0.777995	0.136098		-0.777798	0.560125		-0.778514	0.923962		-0.800365	0.566833
-0.777804	-0.252349		-0.777421	0.297749		-0.777581	0.125998		-0.777329	0.134227		-0.777132	0.553095		-0.777848	0.924273		-0.79976	0.56167
-0.777138	-0.256417		-0.776756	0.2951		-0.776915	0.125558		-0.776663	0.131717		-0.776467	0.546786		-0.777182	0.925061		-0.799154	0.5552
-0.776473	-0.259694		-0.77609	0.292882		-0.776249	0.1253		-0.775997	0.130567		-0.775802	0.541718		-0.776516	0.926399		-0.798549	0.54831
-0.775807	-0.264556		-0.775425	0.289916		-0.775583	0.124327		-0.775331	0.129378		-0.775137	0.535439		-0.77585	0.927698		-0.797943	0.542141
-0.775142	-0.26836		-0.774759	0.287032		-0.774917	0.123247		-0.774665	0.127904		-0.774472	0.528048		-0.775184	0.928467		-0.797338	0.53609
-0.774476	-0.271695		-0.774093	0.284839		-0.774251	0.122319		-0.773999	0.12668		-0.773806	0.522373		-0.774518	0.928044		-0.796732	0.529578
-0.773811	-0.276582		-0.773428	0.282621		-0.773585	0.122479		-0.773333	0.125066		-0.773141	0.516762		-0.773852	0.928251		-0.796127	0.5229
-0.773145	-0.280716		-0.772762	0.280349		-0.772919	0.122941		-0.772667	0.123127		-0.772476	0.510956		-0.773186	0.928782		-0.795521	0.516666
-0.77248	-0.28446		-0.772097	0.278765		-0.772253	0.121973		-0.772001	0.12181		-0.771811	0.504851		-0.77252	0.929729		-0.794916	0.511096
-0.771814	-0.287563		-0.771431	0.276827		-0.771587	0.120204		-0.771335	0.119573		-0.771146	0.499711		-0.771854	0.929874		-0.79431	0.505624
-0.771148	-0.291534		-0.770766	0.274723		-0.770921	0.119929		-0.770669	0.117697		-0.770481	0.494782		-0.771188	0.930663		-0.793705	0.50046
-0.770483	-0.295761		-0.7701	0.272006		-0.770255	0.119608		-0.770003	0.116947		-0.769815	0.489711		-0.770522	0.932602		-0.793099	0.494506
-0.769817	-0.299949		-0.769435	0.270592		-0.769589	0.118444		-0.769337	0.115095		-0.76915	0.483948		-0.769856	0.93383		-0.792494	0.488911
-0.769152	-0.304426		-0.768769	0.267895		-0.768923	0.117207		-0.768671	0.113169		-0.768485	0.478824		-0.76919	0.934065		-0.791888	0.48278
-0.768486	-0.307517		-0.768103	0.264841		-0.768257	0.117196		-0.768005	0.110573		-0.76782	0.472354		-0.768524	0.934614		-0.791283	0.476765
-0.767821	-0.311361		-0.767438	0.26237		-0.767591	0.116288		-0.767339	0.108815		-0.767155	0.467717		-0.767858	0.935311		-0.790677	0.471506
-0.767155	-0.314546		-0.766772	0.260273		-0.766925	0.115012		-0.766673	0.107766		-0.766489	0.462315		-0.767192	0.936398		-0.790072	0.466264
-0.76649	-0.318334		-0.766107	0.257638		-0.766259	0.114419		-0.766007	0.106738		-0.765824	0.456981		-0.766526	0.937461		-0.789466	0.460672
-0.765824	-0.321533		-0.765441	0.255148		-0.765593	0.114511		-0.765342	0.106069		-0.765159	0.452237		-0.76586	0.938797		-0.788861	0.455121
-0.765159	-0.324581		-0.764776	0.253552		-0.764927	0.115377		-0.764675	0.10454		-0.764494	0.447901		-0.765194	0.939592		-0.788255	0.449856
-0.764493	-0.327851		-0.76411	0.251788		-0.764261	0.115199		-0.76401	0.102608		-0.763829	0.443593		-0.764528	0.93992		-0.78765	0.445305
-0.763828	-0.331093		-0.763445	0.249713		-0.763595	0.11459		-0.763344	0.101782		-0.763163	0.437754		-0.763862	0.940953		-0.787044	0.44022
-0.763162	-0.334797		-0.762779	0.248184		-0.762929	0.113416		-0.762678	0.100936		-0.762498	0.433136		-0.763196	0.942774		-0.786439	0.436015
-0.762497	-0.3371		-0.762114	0.246799		-0.762263	0.112646		-0.762012	0.100064		-0.761833	0.42856		-0.76253	0.943518		-0.785833	0.430583
-0.761831	-0.340227		-0.761448	0.245986		-0.761597	0.111171		-0.761346	0.099183		-0.761168	0.424356		-0.761864	0.943875		-0.785228	0.426691
-0.761165	-0.342746		-0.760782	0.243588		-0.760931	0.109292		-0.76068	0.09882		-0.760503	0.419343		-0.761198	0.945035		-0.784622	0.422555
-0.7605	-0.346597		-0.760117	0.241281		-0.760265	0.109228		-0.760014	0.097687		-0.759838	0.414917		-0.760532	0.945717		-0.784017	0.418085
-0.759834	-0.349872		-0.759451	0.239842		-0.759599	0.107951		-0.759348	0.095808		-0.759172	0.410986		-0.759866	0.945994		-0.783411	0.413873
-0.759169	-0.353328		-0.758786	0.23856		-0.758933	0.107898		-0.758682	0.094783		-0.758507	0.406303		-0.7592	0.946581		-0.782806	0.410126
-0.758503	-0.356537		-0.75812	0.237572		-0.758267	0.107193		-0.758016	0.093559		-0.757842	0.402334		-0.758534	0.948126		-0.7822	0.405934
-0.757838	-0.360016		-0.757455	0.236749		-0.757601	0.108323		-0.75735	0.092511		-0.757177	0.399037		-0.757868	0.949969		-0.781595	0.401854
-0.757172	-0.363131		-0.756789	0.236055		-0.756935	0.108674		-0.756684	0.091563		-0.756512	0.394597		-0.757202	0.951504		-0.780989	0.397252
-0.756507	-0.365788		-0.756124	0.234645		-0.756269	0.110865		-0.756018	0.090952		-0.755846	0.390776		-0.756536	0.952914		-0.780384	0.393026
-0.755841	-0.368556		-0.755458	0.233041		-0.755603	0.113424		-0.755352	0.089677		-0.755181	0.386093		-0.75587	0.953761		-0.779778	0.388982
-0.755176	-0.372562		-0.754793	0.231988		-0.754937	0.116249		-0.754686	0.088473		-0.754516	0.381661		-0.755204	0.954156		-0.779173	0.38523
-0.75451	-0.37686		-0.754127	0.229982		-0.754272	0.117581		-0.75402	0.08755		-0.753851	0.377495		-0.754538	0.955105		-0.778567	0.382067
-0.753845	-0.380482		-0.753461	0.228532		-0.753605	0.117792		-0.753354	0.086745		-0.753186	0.373344		-0.753872	0.955497		-0.777962	0.378882
-0.753179	-0.384228		-0.752796	0.227195		-0.75294	0.117098		-0.752688	0.085507		-0.75252	0.369641		-0.753206	0.95587		-0.777356	0.374947
-0.752514	-0.388282		-0.75213	0.225391		-0.752274	0.115985		-0.752022	0.083502		-0.751855	0.365247		-0.75254	0.956286		-0.776751	0.370792
-0.751848	-0.391147		-0.751465	0.224351		-0.751608	0.115304		-0.751356	0.082203		-0.75119	0.360574		-0.751874	0.956676		-0.776145	0.366817
-0.751182	-0.393499		-0.750799	0.223118		-0.750942	0.114734		-0.75069	0.081323		-0.750525	0.356066		-0.751208	0.957842		-0.77554	0.3633
-0.750517	-0.396185		-0.750134	0.221443		-0.750276	0.114285		-0.750024	0.080449		-0.74986	0.352139		-0.750542	0.958802		-0.774934	0.359262
-0.749851	-0.398938		-0.749468	0.219798		-0.74961	0.114111		-0.749358	0.079104		-0.749194	0.349029		-0.749876	0.958932		-0.774329	0.355384
-0.749186	-0.402451		-0.748803	0.217539		-0.748944	0.113984		-0.748692	0.077183		-0.748529	0.34472		-0.74921	0.959737		-0.773723	0.352047
-0.74852	-0.405717		-0.748137	0.21503		-0.748278	0.113684		-0.748026	0.076057		-0.747864	0.339608		-0.748544	0.961511		-0.773118	0.348558
-0.747855	-0.408441		-0.747471	0.213281		-0.747612	0.11388		-0.74736	0.075288		-0.747199	0.335585		-0.747878	0.961762		-0.772512	0.345447
-0.747189	-0.410685		-0.746806	0.211713		-0.746946	0.113234		-0.746694	0.075044		-0.746534	0.332435		-0.747212	0.961482		-0.771907	0.342706
-0.746524	-0.412976		-0.74614	0.210142		-0.74628	0.112561		-0.746028	0.074204		-0.745869	0.328285		-0.746546	0.962624		-0.771301	0.339904
-0.745858	-0.41492		-0.745475	0.208863		-0.745614	0.112768		-0.745362	0.073685		-0.745203	0.323548		-0.74588	0.963061		-0.770696	0.336752
-0.745193	-0.417271		-0.744809	0.208022		-0.744948	0.112434		-0.744696	0.073511		-0.744538	0.319794		-0.745214	0.964197		-0.77009	0.333445
-0.744527	-0.420063		-0.744144	0.206961		-0.744282	0.111307		-0.74403	0.073297		-0.743873	0.316649		-0.744548	0.965614		-0.769485	0.330451
-0.743862	-0.422667		-0.743478	0.206341		-0.743616	0.109881		-0.743364	0.074003		-0.743208	0.313506		-0.743882	0.966209		-0.768879	0.326981
-0.743196	-0.425199		-0.742813	0.205572		-0.74295	0.109338		-0.742698	0.073452		-0.742543	0.309386		-0.743216	0.967683		-0.768274	0.324178
-0.742531	-0.427755		-0.742147	0.204672		-0.742284	0.109367		-0.742032	0.072225		-0.741877	0.3063		-0.74255	0.969163		-0.767668	0.321501
-0.741865	-0.431338		-0.741482	0.203865		-0.741618	0.10838		-0.741366	0.071648		-0.741212	0.302061		-0.741884	0.970635		-0.767063	0.31858
-0.741199	-0.434625		-0.740816	0.202875		-0.740952	0.108123		-0.7407	0.071		-0.740547	0.298034		-0.741218	0.972536		-0.766457	0.3154
-0.740534	-0.437084		-0.74015	0.202445		-0.740286	0.107361		-0.740034	0.070699		-0.739882	0.294849		-0.740552	0.972966		-0.765852	0.31235
-0.739868	-0.440279		-0.739485	0.201495		-0.73962	0.105779		-0.739368	0.071202		-0.739217	0.291654		-0.739886	0.973844		-0.765246	0.309259
-0.739203	-0.442597		-0.738819	0.200802		-0.738954	0.105041		-0.738702	0.071026		-0.738551	0.288187		-0.73922	0.974055		-0.764641	0.306392
-0.738537	-0.445058		-0.738154	0.199869		-0.738288	0.105588		-0.738036	0.069877		-0.737886	0.284673		-0.738554	0.975521		-0.764035	0.303588
-0.737872	-0.448396		-0.737488	0.198298		-0.737622	0.104834		-0.73737	0.06906		-0.737221	0.281541		-0.737888	0.976718		-0.76343	0.300527
-0.737206	-0.450954		-0.736823	0.197434		-0.736956	0.104976		-0.736704	0.067958		-0.736556	0.277624		-0.737222	0.97755		-0.762824	0.298011
-0.736541	-0.453601		-0.736157	0.196128		-0.73629	0.105234		-0.736038	0.067587		-0.735891	0.274295		-0.736556	0.978938		-0.762219	0.295502
-0.735875	-0.457062		-0.735492	0.19461		-0.735624	0.105736		-0.735372	0.066306		-0.735225	0.271018		-0.73589	0.98036		-0.761613	0.292687
-0.73521	-0.45907		-0.734826	0.193102		-0.734958	0.105156		-0.734706	0.065554		-0.73456	0.267988		-0.735224	0.981208		-0.761008	0.289801
-0.734544	-0.461966		-0.73416	0.191625		-0.734292	0.105217		-0.73404	0.065277		-0.733895	0.264192		-0.734558	0.982355		-0.760402	0.286694
-0.733879	-0.464603		-0.733495	0.19026		-0.733626	0.104381		-0.733374	0.063906		-0.73323	0.260861		-0.733892	0.984036		-0.759797	0.28442
-0.733213	-0.467074		-0.732829	0.189057		-0.73296	0.103351		-0.732709	0.063119		-0.732565	0.257803		-0.733226	0.985718		-0.759191	0.281585
-0.732548	-0.469509		-0.732164	0.187599		-0.732294	0.103114		-0.732043	0.061962		-0.731899	0.254285		-0.73256	0.986867		-0.758586	0.279028
-0.731882	-0.471837		-0.731498	0.18594		-0.731628	0.102611		-0.731377	0.061704		-0.731234	0.250143		-0.731894	0.987572		-0.75798	0.276642
-0.731217	-0.473912		-0.730833	0.184567		-0.730962	0.101881		-0.730711	0.061277		-0.730569	0.246045		-0.731228	0.988622		-0.757375	0.273858
-0.730551	-0.475723		-0.730167	0.183227		-0.730296	0.101462		-0.730045	0.059581		-0.729904	0.242581		-0.730562	0.989414		-0.756769	0.270851
-0.729885	-0.4786		-0.729502	0.182566		-0.72963	0.101035		-0.729379	0.058606		-0.729239	0.239624		-0.729896	0.990308		-0.756164	0.268076
-0.72922	-0.481934		-0.728836	0.181552		-0.728964	0.101119		-0.728713	0.057726		-0.728574	0.236247		-0.72923	0.99185		-0.755558	0.265542
-0.728554	-0.484805		-0.728171	0.179418		-0.728298	0.101374		-0.728047	0.056228		-0.727908	0.233747		-0.728564	0.993655		-0.754953	0.262159
-0.727889	-0.487439		-0.727505	0.177798		-0.727632	0.102047		-0.727381	0.054393		-0.727243	0.232092		-0.727898	0.994926		-0.754347	0.259123
-0.727223	-0.489674		-0.726839	0.1764		-0.726966	0.100657		-0.726715	0.053008		-0.726578	0.229108		-0.727232	0.996946		-0.753742	0.256975
-0.726558	-0.491955		-0.726174	0.175329		-0.7263	0.100344		-0.726049	0.053069		-0.725913	0.226034		-0.726566	0.999396		-0.753136	0.254178
-0.725892	-0.492889		-0.725508	0.173643		-0.725634	0.099502		-0.725383	0.052883		-0.725248	0.223285		-0.7259	1.00177		-0.752531	0.252603
-0.725227	-0.494072		-0.724843	0.172118		-0.724968	0.099132		-0.724717	0.052994		-0.724582	0.220749		-0.725234	1.00347		-0.751925	0.249799
-0.724561	-0.495714		-0.724177	0.170434		-0.724302	0.097205		-0.724051	0.052286		-0.723917	0.218395		-0.724568	1.00454		-0.75132	0.246675
-0.723896	-0.498636		-0.723512	0.168648		-0.723636	0.095431		-0.723385	0.051905		-0.723252	0.217139		-0.723902	1.00532		-0.750714	0.244624
-0.72323	-0.501768		-0.722846	0.167492		-0.72297	0.092785		-0.722719	0.050896		-0.722587	0.213867		-0.723236	1.00675		-0.750109	0.242999
-0.722565	-0.504367		-0.722181	0.166514		-0.722304	0.089423		-0.722053	0.050037		-0.721922	0.211453		-0.72257	1.00872		-0.749503	0.240825
-0.721899	-0.505608		-0.721515	0.1654		-0.721638	0.086652		-0.721387	0.049247		-0.721256	0.207189		-0.721904	1.01049		-0.748898	0.238394
-0.721234	-0.506849		-0.72085	0.164992		-0.720972	0.085106		-0.720721	0.04827		-0.720591	0.20398		-0.721238	1.01214		-0.748292	0.235437
-0.720568	-0.508812		-0.720184	0.164735		-0.720306	0.08395		-0.720055	0.047547		-0.719926	0.201087		-0.720572	1.01362		-0.747687	0.233155
-0.719903	-0.510938		-0.719518	0.164		-0.71964	0.084012		-0.719389	0.047358		-0.719261	0.197266		-0.719906	1.01604		-0.747081	0.230961
-0.719237	-0.51168		-0.718853	0.16294		-0.718974	0.084151		-0.718723	0.047779		-0.718596	0.194408		-0.71924	1.01851		-0.746476	0.229085
-0.718571	-0.514786		-0.718187	0.161001		-0.718308	0.083782		-0.718057	0.047763		-0.717931	0.192718		-0.718574	1.01998		-0.74587	0.226149
-0.717906	-0.517734		-0.717522	0.159424		-0.717642	0.083462		-0.717391	0.047106		-0.717265	0.190741		-0.717908	1.0212		-0.745265	0.223389
-0.71724	-0.51963		-0.716856	0.158629		-0.716976	0.08289		-0.716725	0.045753		-0.7166	0.188253		-0.717242	1.02281		-0.744659	0.22076
-0.716575	-0.521318		-0.716191	0.158361		-0.71631	0.082267		-0.716059	0.045119		-0.715935	0.18546		-0.716576	1.02507		-0.744054	0.218588
-0.715909	-0.522814		-0.715525	0.157275		-0.715644	0.081484		-0.715393	0.045125		-0.71527	0.183933		-0.71591	1.02738		-0.743448	0.21665
-0.715244	-0.524666		-0.71486	0.156286		-0.714978	0.080538		-0.714727	0.044379		-0.714605	0.183419		-0.715244	1.02929		-0.742843	0.214266
-0.714578	-0.527062		-0.714194	0.155766		-0.714312	0.079729		-0.714061	0.043667		-0.713939	0.181788		-0.714578	1.03179		-0.742237	0.211996
-0.713913	-0.529674		-0.713528	0.155234		-0.713646	0.079119		-0.713395	0.043344		-0.713274	0.179411		-0.713912	1.03413		-0.741632	0.210265
-0.713247	-0.530942		-0.712863	0.154866		-0.71298	0.078596		-0.712729	0.042569		-0.712609	0.177966		-0.713246	1.03545		-0.741026	0.208433
-0.712582	-0.533499		-0.712197	0.154272		-0.712314	0.078226		-0.712063	0.04234		-0.711944	0.176265		-0.71258	1.03653		-0.740421	0.206304
-0.711916	-0.535992		-0.711532	0.152497		-0.711648	0.077936		-0.711397	0.041705		-0.711279	0.173465		-0.711914	1.03802		-0.739815	0.204793
-0.711251	-0.538371		-0.710866	0.151665		-0.710982	0.078163		-0.710731	0.04191		-0.710613	0.171379		-0.711248	1.03966		-0.73921	0.202293
-0.710585	-0.540119		-0.710201	0.150575		-0.710316	0.078137		-0.710065	0.041387		-0.709948	0.169817		-0.710582	1.04137		-0.738604	0.19992
-0.70992	-0.542146		-0.709535	0.148522		-0.70965	0.077993		-0.709399	0.04092		-0.709283	0.167343		-0.709916	1.04254		-0.737999	0.198169
-0.709254	-0.543886		-0.70887	0.147773		-0.708984	0.077198		-0.708733	0.040658		-0.708618	0.165473		-0.70925	1.04319		-0.737393	0.19636
-0.708588	-0.544286		-0.708204	0.146626		-0.708318	0.076945		-0.708067	0.040023		-0.707953	0.164568		-0.708584	1.04428		-0.736788	0.194144
-0.707923	-0.545245		-0.707538	0.145894		-0.707652	0.076671		-0.707401	0.038835		-0.707288	0.163476		-0.707918	1.04585		-0.736182	0.192086
-0.707257	-0.546573		-0.706873	0.144478		-0.706986	0.07593		-0.706735	0.037678		-0.706622	0.161604		-0.707252	1.04842		-0.735577	0.190478
-0.706592	-0.547579		-0.706207	0.143421		-0.70632	0.077019		-0.706069	0.036582		-0.705957	0.159646		-0.706586	1.05132		-0.734971	0.188504
-0.705926	-0.54847		-0.705542	0.141761		-0.705654	0.076527		-0.705403	0.035789		-0.705292	0.158177		-0.70592	1.0535		-0.734366	0.186113
-0.705261	-0.550967		-0.704876	0.140767		-0.704988	0.075635		-0.704737	0.035189		-0.704627	0.155774		-0.705254	1.05551		-0.73376	0.18406
-0.704595	-0.552758		-0.704211	0.140454		-0.704322	0.07495		-0.704071	0.034318		-0.703962	0.154108		-0.704588	1.05682		-0.733155	0.181804
-0.70393	-0.553632		-0.703545	0.140101		-0.703656	0.073433		-0.703405	0.033637		-0.703296	0.152357		-0.703922	1.05771		-0.732549	0.180398
-0.703264	-0.555013		-0.70288	0.139432		-0.70299	0.07192		-0.702739	0.03296		-0.702631	0.151129		-0.703256	1.05852		-0.731944	0.17954
-0.702599	-0.55555		-0.702214	0.138603		-0.702324	0.071255		-0.702073	0.032881		-0.701966	0.149249		-0.70259	1.0601		-0.731338	0.177778
-0.701933	-0.556731		-0.701549	0.137254		-0.701658	0.071455		-0.701407	0.032144		-0.701301	0.147697		-0.701924	1.06284		-0.730733	0.175933
-0.701268	-0.557834		-0.700883	0.136866		-0.700992	0.070426		-0.700742	0.031558		-0.700636	0.146721		-0.701258	1.06503		-0.730127	0.174529
-0.700602	-0.559537		-0.700217	0.136434		-0.700326	0.070519		-0.700076	0.031868		-0.69997	0.145342		-0.700592	1.06682		-0.729522	0.17322
-0.699937	-0.561485		-0.699552	0.136208		-0.69966	0.070387		-0.69941	0.031361		-0.699305	0.143544		-0.699926	1.06832		-0.728916	0.171051
-0.699271	-0.563017		-0.698886	0.136411		-0.698994	0.068971		-0.698744	0.030963		-0.69864	0.141816		-0.69926	1.0708		-0.728311	0.16914
-0.698606	-0.564592		-0.698221	0.136345		-0.698328	0.069239		-0.698078	0.030355		-0.697975	0.140208		-0.698594	1.07307		-0.727705	0.16709
-0.69794	-0.566053		-0.697555	0.135377		-0.697662	0.069444		-0.697412	0.030665		-0.69731	0.139015		-0.697928	1.07542		-0.7271	0.164999
-0.697274	-0.567527		-0.69689	0.135159		-0.696996	0.068634		-0.696746	0.031595		-0.696645	0.138298		-0.697262	1.07798		-0.726494	0.162826
-0.696609	-0.56803		-0.696224	0.134261		-0.69633	0.069773		-0.69608	0.031713		-0.695979	0.137206		-0.696596	1.08022		-0.725889	0.160885
-0.695943	-0.568462		-0.695559	0.133466		-0.695664	0.069055		-0.695414	0.031418		-0.695314	0.135495		-0.69593	1.08183		-0.725283	0.159034
-0.695278	-0.568604		-0.694893	0.133937		-0.694998	0.068773		-0.694748	0.031717		-0.694649	0.133623		-0.695264	1.08293		-0.724678	0.157109
-0.694612	-0.570092		-0.694227	0.133912		-0.694332	0.06772		-0.694082	0.031867		-0.693984	0.131687		-0.694598	1.08372		-0.724072	0.155677
-0.693947	-0.571511		-0.693562	0.134813		-0.693666	0.068268		-0.693416	0.031511		-0.693319	0.130382		-0.693932	1.08466		-0.723467	0.154808
-0.693281	-0.572945		-0.692896	0.133803		-0.693	0.067888		-0.69275	0.03083		-0.692653	0.129753		-0.693266	1.0852		-0.722861	0.153451
-0.692616	-0.575028		-0.692231	0.133814		-0.692334	0.068113		-0.692084	0.030009		-0.691988	0.128539		-0.6926	1.0856		-0.722256	0.153055
-0.69195	-0.576738		-0.691565	0.134097		-0.691668	0.067893		-0.691418	0.029563		-0.691323	0.127352		-0.691934	1.08643		-0.72165	0.152616
-0.691285	-0.578347		-0.6909	0.133545		-0.691002	0.068399		-0.690752	0.029825		-0.690658	0.126287		-0.691268	1.08863		-0.721045	0.151891
-0.690619	-0.579084		-0.690234	0.133446		-0.690336	0.068215		-0.690086	0.029472		-0.689993	0.124315		-0.690602	1.09135		-0.720439	0.149945
-0.689954	-0.580067		-0.689569	0.13216		-0.68967	0.067768		-0.68942	0.029079		-0.689327	0.122953		-0.689936	1.09287		-0.719834	0.148009
-0.689288	-0.58161		-0.688903	0.130696		-0.689004	0.067153		-0.688754	0.028576		-0.688662	0.122222		-0.68927	1.09387		-0.719228	0.145767
-0.688623	-0.583365		-0.688238	0.130781		-0.688339	0.065526		-0.688088	0.028793		-0.687997	0.122156		-0.688604	1.09494		-0.718623	0.143689
-0.687957	-0.585705		-0.687572	0.13031		-0.687672	0.064787		-0.687422	0.02917		-0.687332	0.121085		-0.687938	1.09639		-0.718017	0.142382
-0.687292	-0.58733		-0.686906	0.129253		-0.687007	0.064865		-0.686756	0.029226		-0.686667	0.119857		-0.687272	1.09733		-0.717412	0.141186
-0.686626	-0.587653		-0.686241	0.12806		-0.686341	0.064852		-0.68609	0.028962		-0.686002	0.119134		-0.686606	1.09818		-0.716806	0.139833
-0.68596	-0.588738		-0.685575	0.127708		-0.685675	0.064574		-0.685424	0.028438		-0.685336	0.118637		-0.68594	1.09963		-0.716201	0.138727
-0.685295	-0.58914		-0.68491	0.127637		-0.685009	0.065117		-0.684758	0.02794		-0.684671	0.117354		-0.685274	1.10185		-0.715595	0.137292
-0.684629	-0.589641		-0.684244	0.127282		-0.684343	0.064327		-0.684092	0.028335		-0.684006	0.116113		-0.684608	1.10374		-0.71499	0.135871
-0.683964	-0.590623		-0.683579	0.127031		-0.683677	0.063763		-0.683426	0.028591		-0.683341	0.115813		-0.683942	1.10519		-0.714384	0.134736
-0.683298	-0.591812		-0.682913	0.126816		-0.683011	0.062818		-0.68276	0.028288		-0.682676	0.11568		-0.683276	1.10681		-0.713779	0.133364
-0.682633	-0.593122		-0.682248	0.126944		-0.682345	0.061949		-0.682094	0.028417		-0.68201	0.114995		-0.68261	1.10817		-0.713173	0.131149
-0.681967	-0.59408		-0.681582	0.127825		-0.681679	0.061757		-0.681428	0.029099		-0.681345	0.112793		-0.681944	1.10925		-0.712568	0.129908
-0.681302	-0.594888		-0.680916	0.127049		-0.681013	0.061768		-0.680762	0.029082		-0.68068	0.110966		-0.681278	1.11061		-0.711962	0.129046
-0.680636	-0.595737		-0.680251	0.12605		-0.680347	0.061069		-0.680096	0.029178		-0.680015	0.109697		-0.680612	1.11234		-0.711357	0.128203
-0.679971	-0.598133		-0.679585	0.124956		-0.679681	0.061471		-0.67943	0.029288		-0.67935	0.10807		-0.679946	1.11448		-0.710751	0.127894
-0.679305	-0.59996		-0.67892	0.123927		-0.679015	0.062088		-0.678764	0.0287		-0.678684	0.106356		-0.67928	1.11766		-0.710146	0.12697
-0.67864	-0.599993		-0.678254	0.123115		-0.678349	0.062301		-0.678098	0.027727		-0.678019	0.10523		-0.678614	1.12043		-0.70954	0.126027
-0.677974	-0.600576		-0.677589	0.122869		-0.677683	0.062783		-0.677432	0.025797		-0.677354	0.104459		-0.677948	1.12227		-0.708935	0.124785
-0.677309	-0.602462		-0.676923	0.122574		-0.677017	0.062478		-0.676766	0.025584		-0.676689	0.103502		-0.677282	1.12398		-0.708329	0.123608
-0.676643	-0.604251		-0.676258	0.122342		-0.676351	0.061328		-0.6761	0.024391		-0.676024	0.103091		-0.676616	1.12664		-0.707724	0.122281
-0.675977	-0.605849		-0.675592	0.122183		-0.675685	0.061521		-0.675434	0.024172		-0.675359	0.101727		-0.67595	1.12912		-0.707118	0.120437
-0.675312	-0.60799		-0.674927	0.1218		-0.675019	0.061406		-0.674768	0.023946		-0.674693	0.100139		-0.675284	1.13115		-0.706513	0.118467
-0.674646	-0.609576		-0.674261	0.120927		-0.674353	0.060825		-0.674102	0.02304		-0.674028	0.099042		-0.674618	1.13279		-0.705907	0.117551
-0.673981	-0.611587		-0.673595	0.119945		-0.673687	0.060478		-0.673436	0.022888		-0.673363	0.098407		-0.673952	1.13429		-0.705302	0.11656
-0.673315	-0.613012		-0.67293	0.11948		-0.673021	0.059657		-0.67277	0.021582		-0.672698	0.097906		-0.673286	1.13538		-0.704696	0.115184
-0.67265	-0.614366		-0.672264	0.1189		-0.672355	0.05962		-0.672104	0.020994		-0.672033	0.096533		-0.67262	1.13705		-0.704091	0.114398
-0.671984	-0.614706		-0.671599	0.11834		-0.671689	0.060107		-0.671438	0.020396		-0.671367	0.094839		-0.671954	1.13845		-0.703485	0.114125
-0.671319	-0.615635		-0.670933	0.118492		-0.671023	0.060349		-0.670772	0.020215		-0.670702	0.093224		-0.671288	1.14003		-0.70288	0.113515
-0.670653	-0.617163		-0.670268	0.118481		-0.670357	0.060863		-0.670106	0.019529		-0.670037	0.092777		-0.670622	1.14183		-0.702274	0.112068
-0.669988	-0.61838		-0.669602	0.118134		-0.669691	0.061185		-0.669441	0.019282		-0.669372	0.091791		-0.669956	1.14334		-0.701669	0.11022
-0.669322	-0.62065		-0.668937	0.11818		-0.669025	0.061499		-0.668774	0.018667		-0.668707	0.09108		-0.66929	1.14539		-0.701063	0.109412
-0.668657	-0.622413		-0.668271	0.118736		-0.668359	0.06139		-0.668109	0.017929		-0.668041	0.089675		-0.668624	1.14634		-0.700458	0.108701
-0.667991	-0.624022		-0.667606	0.118115		-0.667693	0.061059		-0.667443	0.017359		-0.667376	0.088688		-0.667958	1.14745		-0.699852	0.10805
-0.667326	-0.624958		-0.66694	0.11798		-0.667027	0.060268		-0.666777	0.01627		-0.666711	0.088156		-0.667292	1.14928		-0.699247	0.107089
-0.66666	-0.626399		-0.666274	0.118089		-0.666361	0.060323		-0.666111	0.016205		-0.666046	0.088017		-0.666626	1.15047		-0.698641	0.105886
-0.665995	-0.628064		-0.665609	0.117174		-0.665695	0.060414		-0.665445	0.016051		-0.665381	0.088021		-0.66596	1.15197		-0.698036	0.105118
-0.665329	-0.629948		-0.664943	0.116683		-0.665029	0.059345		-0.664779	0.015825		-0.664715	0.08768		-0.665294	1.15353		-0.69743	0.104553
-0.664663	-0.630998		-0.664278	0.116328		-0.664363	0.059002		-0.664113	0.015713		-0.66405	0.086258		-0.664628	1.15506		-0.696825	0.103399
-0.663998	-0.632523		-0.663612	0.11671		-0.663697	0.058932		-0.663447	0.014628		-0.663385	0.084787		-0.663962	1.15628		-0.696219	0.102303
-0.663332	-0.633728		-0.662947	0.116096		-0.663031	0.058015		-0.662781	0.013844		-0.66272	0.083355		-0.663296	1.15794		-0.695614	0.101744
-0.662667	-0.635095		-0.662281	0.115985		-0.662365	0.05751		-0.662115	0.01374		-0.662055	0.082644		-0.66263	1.15925		-0.695008	0.100556
-0.662001	-0.637019		-0.661616	0.114356		-0.661699	0.05643		-0.661449	0.013867		-0.66139	0.082191		-0.661964	1.16137		-0.694403	0.100707
-0.661336	-0.638198		-0.66095	0.114117		-0.661033	0.055479		-0.660783	0.014485		-0.660724	0.081984		-0.661298	1.16357		-0.693797	0.100077
-0.66067	-0.638941		-0.660284	0.11242		-0.660367	0.054762		-0.660117	0.013773		-0.660059	0.080816		-0.660632	1.16538		-0.693192	0.099678
-0.660005	-0.640536		-0.659619	0.113606		-0.659701	0.054284		-0.659451	0.013757		-0.659394	0.078671		-0.659966	1.16754		-0.692586	0.099618
-0.659339	-0.641754		-0.658953	0.114494		-0.659035	0.053157		-0.658785	0.012659		-0.658729	0.077481		-0.6593	1.17029		-0.69198	0.099287
-0.658674	-0.642934		-0.658288	0.113943		-0.658369	0.053229		-0.658119	0.01175		-0.658064	0.076359		-0.658634	1.17305		-0.691375	0.098885
-0.658008	-0.644074		-0.657622	0.113326		-0.657703	0.052406		-0.657453	0.010453		-0.657398	0.075346		-0.657968	1.1742		-0.69077	0.097923
-0.657343	-0.645244		-0.656957	0.112603		-0.657037	0.05141		-0.656787	0.01029		-0.656733	0.075357		-0.657302	1.17467		-0.690164	0.096144
-0.656677	-0.64695		-0.656291	0.113699		-0.656371	0.051275		-0.656121	0.009804		-0.656068	0.074666		-0.656636	1.17629		-0.689559	0.094799
-0.656012	-0.648403		-0.655626	0.114517		-0.655705	0.051488		-0.655455	0.00986		-0.655403	0.073294		-0.65597	1.17818		-0.688953	0.093748
-0.655346	-0.648838		-0.65496	0.113654		-0.655039	0.051761		-0.654789	0.009119		-0.654738	0.072274		-0.655304	1.17983		-0.688347	0.093711
-0.65468	-0.648871		-0.654294	0.11284		-0.654373	0.05149		-0.654123	0.008318		-0.654072	0.071937		-0.654638	1.18111		-0.687742	0.093089
-0.654015	-0.649433		-0.653629	0.113029		-0.653707	0.051322		-0.653457	0.007751		-0.653407	0.071377		-0.653972	1.18301		-0.687137	0.093038
-0.653349	-0.650875		-0.652963	0.113375		-0.653041	0.050259		-0.652791	0.007464		-0.652742	0.071037		-0.653306	1.18512		-0.686531	0.092579
-0.652684	-0.652142		-0.652298	0.114129		-0.652375	0.050008		-0.652125	0.00803		-0.652077	0.069809		-0.65264	1.18649		-0.685925	0.091847
-0.652018	-0.653066		-0.651632	0.113519		-0.651709	0.049681		-0.651459	0.007774		-0.651412	0.069032		-0.651974	1.18795		-0.68532	0.091127
-0.651353	-0.654119		-0.650967	0.113233		-0.651043	0.049762		-0.650793	0.006861		-0.650746	0.068494		-0.651308	1.18989		-0.684714	0.090167
-0.650687	-0.655144		-0.650301	0.112967		-0.650377	0.049757		-0.650127	0.007169		-0.650081	0.067553		-0.650642	1.19232		-0.684109	0.089339
-0.650022	-0.655928		-0.649636	0.112738		-0.649711	0.049968		-0.649461	0.007825		-0.649416	0.06627		-0.649976	1.19437		-0.683504	0.088587
-0.649356	-0.656281		-0.64897	0.112295		-0.649045	0.050155		-0.648795	0.007297		-0.648751	0.064607		-0.64931	1.19628		-0.682898	0.087544
-0.648691	-0.656715		-0.648305	0.111128		-0.648379	0.050746		-0.648129	0.006543		-0.648086	0.063294		-0.648644	1.19866		-0.682292	0.087397
-0.648025	-0.65813		-0.647639	0.111009		-0.647713	0.050582		-0.647463	0.006019		-0.647421	0.062477		-0.647978	1.20026		-0.681687	0.087184
-0.64736	-0.659656		-0.646973	0.110908		-0.647047	0.051345		-0.646797	0.004558		-0.646755	0.061324		-0.647312	1.2021		-0.681081	0.08637
-0.646694	-0.660704		-0.646308	0.111032		-0.646381	0.051022		-0.646131	0.003486		-0.64609	0.060632		-0.646646	1.20419		-0.680476	0.085676
-0.646029	-0.661006		-0.645642	0.110616		-0.645715	0.050343		-0.645465	0.002576		-0.645425	0.060454		-0.64598	1.20488		-0.67987	0.085652
-0.645363	-0.662176		-0.644977	0.110072		-0.645049	0.049293		-0.644799	0.001965		-0.64476	0.060341		-0.645314	1.20578		-0.679265	0.085124
-0.644698	-0.663544		-0.644311	0.109675		-0.644383	0.047851		-0.644133	0.002128		-0.644095	0.059203		-0.644648	1.2077		-0.678659	0.084673
-0.644032	-0.663903		-0.643646	0.109424		-0.643717	0.047812		-0.643467	0.001431		-0.643429	0.057927		-0.643982	1.20897		-0.678054	0.083482
-0.643366	-0.664457		-0.64298	0.109046		-0.643051	0.047495		-0.642801	0.001285		-0.642764	0.056874		-0.643316	1.20936		-0.677448	0.082242
-0.642701	-0.665456		-0.642315	0.108874		-0.642385	0.046407		-0.642135	0.000499		-0.642099	0.056001		-0.64265	1.21027		-0.676843	0.081702
-0.642035	-0.667057		-0.641649	0.10871		-0.641719	0.046		-0.641469	-0.000449		-0.641434	0.0557		-0.641984	1.21213		-0.676237	0.081386
-0.64137	-0.668269		-0.640984	0.10847		-0.641053	0.045991		-0.640803	-0.000524		-0.640769	0.055071		-0.641318	1.21353		-0.675632	0.081675
-0.640704	-0.669031		-0.640318	0.108684		-0.640387	0.046112		-0.640137	-0.00063		-0.640103	0.053863		-0.640652	1.21465		-0.675026	0.081123
-0.640039	-0.670249		-0.639652	0.109197		-0.639721	0.045958		-0.639471	0.000299		-0.639438	0.052749		-0.639986	1.21585		-0.674421	0.080477
-0.639373	-0.671876		-0.638987	0.109938		-0.639055	0.046452		-0.638805	0.000238		-0.638773	0.051789		-0.63932	1.21774		-0.673815	0.080216
-0.638708	-0.673598		-0.638321	0.109909		-0.638389	0.046314		-0.638139	0.000607		-0.638108	0.050607		-0.638654	1.22021		-0.67321	0.080359
-0.638042	-0.675051		-0.637656	0.11006		-0.637723	0.045199		-0.637473	0.000702		-0.637443	0.049372		-0.637988	1.22195		-0.672604	0.079738
-0.637377	-0.676238		-0.63699	0.108795		-0.637057	0.044212		-0.636808	0.000357		-0.636778	0.048047		-0.637322	1.22392		-0.671999	0.078334
-0.636711	-0.677299		-0.636325	0.10798		-0.636391	0.044563		-0.636142	0.000838		-0.636112	0.046829		-0.636656	1.22569		-0.671393	0.07778
-0.636046	-0.677954		-0.635659	0.108928		-0.635725	0.044332		-0.635476	0.001044		-0.635447	0.045958		-0.63599	1.22703		-0.670788	0.077452
-0.63538	-0.679106		-0.634994	0.108216		-0.635059	0.043374		-0.63481	0.000819		-0.634782	0.045272		-0.635324	1.22944		-0.670182	0.076756
-0.634715	-0.679922		-0.634328	0.108714		-0.634393	0.04388		-0.634144	0.000682		-0.634117	0.044374		-0.634658	1.2308		-0.669577	0.076213
-0.634049	-0.680398		-0.633662	0.108578		-0.633727	0.044299		-0.633478	0.000523		-0.633452	0.04334		-0.633992	1.2324		-0.668971	0.075457
-0.633384	-0.68066		-0.632997	0.107704		-0.633061	0.043795		-0.632812	-0.000238		-0.632786	0.042487		-0.633326	1.23436		-0.668366	0.075471
-0.632718	-0.68071		-0.632331	0.107094		-0.632395	0.044051		-0.632146	-0.000177		-0.632121	0.041888		-0.63266	1.23565		-0.66776	0.07541
-0.632052	-0.680957		-0.631666	0.106706		-0.631729	0.044005		-0.63148	-0.001118		-0.631456	0.041335		-0.631994	1.23726		-0.667155	0.075238
-0.631387	-0.681834		-0.631	0.106266		-0.631063	0.043988		-0.630814	-0.002013		-0.630791	0.040952		-0.631328	1.23912		-0.666549	0.074991
-0.630721	-0.682627		-0.630335	0.104783		-0.630397	0.043825		-0.630148	-0.002116		-0.630126	0.040897		-0.630662	1.24057		-0.665944	0.074486
-0.630056	-0.683081		-0.629669	0.104773		-0.629731	0.043935		-0.629482	-0.002505		-0.62946	0.040387		-0.629996	1.24201		-0.665338	0.073915
-0.62939	-0.683777		-0.629004	0.104294		-0.629065	0.044084		-0.628816	-0.002253		-0.628795	0.039704		-0.62933	1.24346		-0.664733	0.073503
-0.628725	-0.684523		-0.628338	0.104528		-0.628399	0.043929		-0.62815	-0.002687		-0.62813	0.038928		-0.628664	1.24503		-0.664127	0.072946
-0.628059	-0.685155		-0.627673	0.103481		-0.627733	0.044806		-0.627484	-0.004455		-0.627465	0.037649		-0.627998	1.24672		-0.663522	0.073261
-0.627394	-0.686011		-0.627007	0.103261		-0.627067	0.045218		-0.626818	-0.004476		-0.6268	0.036921		-0.627332	1.24805		-0.662916	0.073684
-0.626728	-0.686386		-0.626341	0.101892		-0.626401	0.045267		-0.626152	-0.005325		-0.626135	0.037026		-0.626666	1.24985		-0.662311	0.073491
-0.626063	-0.686812		-0.625676	0.100471		-0.625735	0.045818		-0.625486	-0.004717		-0.625469	0.036595		-0.626	1.25216		-0.661705	0.073323
-0.625397	-0.687439		-0.62501	0.100034		-0.625069	0.045525		-0.62482	-0.00535		-0.624804	0.036055		-0.625334	1.25364		-0.6611	0.072722
-0.624732	-0.687895		-0.624345	0.100127		-0.624403	0.046151		-0.624154	-0.005364		-0.624139	0.035542		-0.624668	1.25512		-0.660494	0.072425
-0.624066	-0.688702		-0.623679	0.099488		-0.623737	0.046213		-0.623488	-0.005682		-0.623474	0.034509		-0.624002	1.2578		-0.659889	0.071618
-0.623401	-0.688857		-0.623014	0.098827		-0.623071	0.045112		-0.622822	-0.005638		-0.622809	0.033875		-0.623336	1.25978		-0.659283	0.070642
-0.622735	-0.688717		-0.622348	0.098762		-0.622406	0.044562		-0.622156	-0.005615		-0.622143	0.033636		-0.62267	1.2613		-0.658678	0.070265
-0.622069	-0.689851		-0.621683	0.098174		-0.62174	0.043986		-0.62149	-0.005872		-0.621478	0.033029		-0.622004	1.26346		-0.658072	0.070329
-0.621404	-0.691245		-0.621017	0.097585		-0.621074	0.043553		-0.620824	-0.006681		-0.620813	0.032076		-0.621338	1.2656		-0.657467	0.07054
-0.620738	-0.69177		-0.620351	0.097176		-0.620408	0.043277		-0.620158	-0.006544		-0.620148	0.03118		-0.620672	1.26772		-0.656861	0.071607
-0.620073	-0.692727		-0.619686	0.097099		-0.619742	0.044094		-0.619492	-0.006963		-0.619483	0.030432		-0.620006	1.26944		-0.656256	0.072009
-0.619407	-0.693949		-0.61902	0.095864		-0.619076	0.043459		-0.618826	-0.008422		-0.618817	0.030052		-0.61934	1.27143		-0.65565	0.071975
-0.618742	-0.694783		-0.618355	0.096296		-0.61841	0.042438		-0.61816	-0.008349		-0.618152	0.029888		-0.618674	1.27374		-0.655045	0.070957
-0.618076	-0.695311		-0.617689	0.095938		-0.617744	0.041294		-0.617494	-0.008166		-0.617487	0.02944		-0.618008	1.27545		-0.654439	0.070205
-0.617411	-0.696378		-0.617024	0.094433		-0.617078	0.041552		-0.616828	-0.008934		-0.616822	0.028974		-0.617342	1.27628		-0.653834	0.069923
-0.616745	-0.698019		-0.616358	0.09407		-0.616412	0.041125		-0.616162	-0.010082		-0.616157	0.028424		-0.616676	1.27769		-0.653228	0.069805
-0.61608	-0.699426		-0.615693	0.094753		-0.615746	0.041486		-0.615496	-0.010636		-0.615492	0.027995		-0.61601	1.27962		-0.652623	0.069945
-0.615414	-0.701098		-0.615027	0.094959		-0.61508	0.040212		-0.61483	-0.011338		-0.614826	0.02761		-0.615344	1.28086		-0.652017	0.070038
-0.614749	-0.702307		-0.614362	0.095105		-0.614414	0.039258		-0.614164	-0.011846		-0.614161	0.027836		-0.614678	1.28208		-0.651412	0.070033
-0.614083	-0.703574		-0.613696	0.094991		-0.613748	0.038885		-0.613498	-0.012119		-0.613496	0.028092		-0.614012	1.2841		-0.650806	0.070153
-0.613418	-0.704538		-0.61303	0.095089		-0.613082	0.03894		-0.612832	-0.012689		-0.612831	0.027909		-0.613346	1.28563		-0.650201	0.069761
-0.612752	-0.70566		-0.612365	0.095124		-0.612416	0.039552		-0.612166	-0.012299		-0.612166	0.027098		-0.61268	1.28799		-0.649595	0.070142
-0.612086	-0.70538		-0.611699	0.096152		-0.61175	0.040567		-0.6115	-0.011638		-0.6115	0.026473		-0.612014	1.29041		-0.64899	0.069409
-0.611421	-0.706037		-0.611034	0.096108		-0.611084	0.040926		-0.610834	-0.012167		-0.610835	0.02604		-0.611348	1.29169		-0.648384	0.069263
-0.610755	-0.706894		-0.610368	0.095766		-0.610418	0.040432		-0.610168	-0.01238		-0.61017	0.025108		-0.610682	1.29323		-0.647779	0.069578
-0.61009	-0.707921		-0.609703	0.095144		-0.609752	0.041497		-0.609502	-0.011822		-0.609505	0.024284		-0.610016	1.2955		-0.647173	0.06961
-0.609424	-0.70833		-0.609037	0.094396		-0.609086	0.041088		-0.608836	-0.011785		-0.60884	0.02387		-0.60935	1.29716		-0.646568	0.069691
-0.608759	-0.708409		-0.608372	0.094394		-0.60842	0.040776		-0.60817	-0.01091		-0.608174	0.023029		-0.608684	1.29832		-0.645962	0.069306
-0.608093	-0.709093		-0.607706	0.094293		-0.607754	0.041198		-0.607504	-0.011172		-0.607509	0.022249		-0.608018	1.30028		-0.645357	0.068881
-0.607428	-0.709159		-0.60704	0.09384		-0.607088	0.041421		-0.606838	-0.010882		-0.606844	0.021732		-0.607352	1.30255		-0.644751	0.068825
-0.606762	-0.708655		-0.606375	0.093325		-0.606422	0.04171		-0.606172	-0.011418		-0.606179	0.021145		-0.606686	1.30439		-0.644146	0.068622
-0.606097	-0.708636		-0.605709	0.092442		-0.605756	0.041133		-0.605507	-0.011104		-0.605514	0.021032		-0.60602	1.30614		-0.64354	0.068077
-0.605431	-0.708932		-0.605044	0.092751		-0.60509	0.041045		-0.604841	-0.011194		-0.604849	0.021719		-0.605354	1.3076		-0.642935	0.067782
-0.604766	-0.709524		-0.604378	0.092496		-0.604424	0.041377		-0.604174	-0.011475		-0.604183	0.022558		-0.604688	1.30916		-0.642329	0.067079
-0.6041	-0.710569		-0.603713	0.092176		-0.603758	0.041655		-0.603509	-0.010665		-0.603518	0.022581		-0.604022	1.3108		-0.641724	0.0672
-0.603435	-0.711556		-0.603047	0.092114		-0.603092	0.041556		-0.602843	-0.010994		-0.602853	0.022062		-0.603356	1.31263		-0.641118	0.067174
-0.602769	-0.712515		-0.602382	0.091147		-0.602426	0.041526		-0.602177	-0.011593		-0.602188	0.021633		-0.60269	1.31487		-0.640513	0.066867
-0.602104	-0.712808		-0.601716	0.091465		-0.60176	0.041949		-0.601511	-0.011723		-0.601523	0.021439		-0.602024	1.31703		-0.639907	0.066481
-0.601438	-0.712676		-0.60105	0.091334		-0.601094	0.041268		-0.600845	-0.011146		-0.600857	0.021376		-0.601358	1.31904		-0.639302	0.066693
-0.600773	-0.713556		-0.600385	0.091045		-0.600428	0.041014		-0.600179	-0.011413		-0.600192	0.021125		-0.600692	1.32114		-0.638696	0.06707
-0.600107	-0.714668		-0.599719	0.090897		-0.599762	0.041007		-0.599513	-0.010726		-0.599527	0.020695		-0.600026	1.32234		-0.638091	0.067147
-0.599441	-0.715962		-0.599054	0.091867		-0.599096	0.040086		-0.598847	-0.011475		-0.598862	0.019881		-0.59936	1.32419		-0.637485	0.066866
-0.598776	-0.71727		-0.598388	0.09169		-0.59843	0.040013		-0.598181	-0.011496		-0.598197	0.018824		-0.598694	1.32571		-0.63688	0.066323
-0.59811	-0.718368		-0.597723	0.09196		-0.597764	0.040506		-0.597515	-0.010995		-0.597531	0.018143		-0.598028	1.32693		-0.636274	0.066339
-0.597445	-0.71966		-0.597057	0.091867		-0.597098	0.039906		-0.596849	-0.011805		-0.596866	0.017882		-0.597362	1.32839		-0.635669	0.067201
-0.596779	-0.720964		-0.596392	0.092532		-0.596432	0.039536		-0.596183	-0.01202		-0.596201	0.017702		-0.596696	1.32994		-0.635063	0.067574
-0.596114	-0.722643		-0.595726	0.09291		-0.595766	0.039359		-0.595517	-0.01306		-0.595536	0.017335		-0.59603	1.33263		-0.634458	0.067495
-0.595448	-0.723381		-0.595061	0.093167		-0.5951	0.039503		-0.594851	-0.013057		-0.594871	0.016823		-0.595364	1.33474		-0.633852	0.066584
-0.594783	-0.723792		-0.594395	0.093131		-0.594434	0.038771		-0.594185	-0.013114		-0.594205	0.016548		-0.594698	1.33638		-0.633247	0.066079
-0.594117	-0.724846		-0.593729	0.093313		-0.593768	0.038165		-0.593519	-0.012105		-0.59354	0.016387		-0.594032	1.33875		-0.632641	0.066199
-0.593452	-0.726337		-0.593064	0.09301		-0.593102	0.038688		-0.592853	-0.011585		-0.592875	0.015844		-0.593366	1.34047		-0.632036	0.06625
-0.592786	-0.727657		-0.592398	0.092583		-0.592436	0.039141		-0.592187	-0.012049		-0.59221	0.015434		-0.5927	1.34157		-0.63143	0.065977
-0.592121	-0.728718		-0.591733	0.091737		-0.59177	0.039286		-0.591521	-0.012642		-0.591545	0.014855		-0.592034	1.34395		-0.630825	0.065762
-0.591455	-0.729687		-0.591067	0.092074		-0.591104	0.038843		-0.590855	-0.013234		-0.590879	0.014183		-0.591368	1.34638		-0.630219	0.065507
-0.590789	-0.730367		-0.590402	0.092002		-0.590438	0.038954		-0.590189	-0.013508		-0.590214	0.013481		-0.590702	1.34824		-0.629614	0.064627
-0.590124	-0.731377		-0.589736	0.092259		-0.589772	0.039298		-0.589523	-0.014031		-0.589549	0.012927		-0.590036	1.34943		-0.629008	0.064594
-0.589458	-0.732635		-0.589071	0.09269		-0.589106	0.040198		-0.588857	-0.014361		-0.588884	0.01212		-0.58937	1.35047		-0.628403	0.064991
-0.588793	-0.73351		-0.588405	0.092252		-0.58844	0.039944		-0.588191	-0.014708		-0.588219	0.011645		-0.588704	1.35179		-0.627797	0.063718
-0.588127	-0.73351		-0.58774	0.092645		-0.587774	0.039998		-0.587525	-0.014762		-0.587554	0.011138		-0.588038	1.35356		-0.627192	0.063534
-0.587462	-0.734093		-0.587074	0.091851		-0.587108	0.039534		-0.586859	-0.014876		-0.586888	0.011793		-0.587372	1.35492		-0.626586	0.063682
-0.586796	-0.734808		-0.586408	0.091287		-0.586442	0.038808		-0.586193	-0.014293		-0.586223	0.011243		-0.586706	1.35637		-0.625981	0.063759
-0.586131	-0.735044		-0.585743	0.09177		-0.585776	0.039163		-0.585527	-0.014099		-0.585558	0.01075		-0.58604	1.35788		-0.625375	0.063461
-0.585465	-0.73591		-0.585077	0.091507		-0.58511	0.0395		-0.584861	-0.014647		-0.584893	0.010397		-0.585374	1.35916		-0.62477	0.063005
-0.5848	-0.736511		-0.584412	0.091458		-0.584444	0.04051		-0.584195	-0.015327		-0.584228	0.008658		-0.584708	1.36025		-0.624164	0.062334
-0.584134	-0.736366		-0.583746	0.092098		-0.583778	0.039796		-0.583529	-0.015395		-0.583562	0.008157		-0.584042	1.36151		-0.623559	0.061442
-0.583469	-0.7361		-0.583081	0.091811		-0.583112	0.039589		-0.582863	-0.014733		-0.582897	0.007409		-0.583376	1.36261		-0.622953	0.061656
-0.582803	-0.736629		-0.582415	0.091147		-0.582446	0.038869		-0.582197	-0.014703		-0.582232	0.006261		-0.58271	1.36373		-0.622348	0.061442
-0.582138	-0.737707		-0.58175	0.090174		-0.58178	0.039468		-0.581531	-0.014151		-0.581567	0.006184		-0.582044	1.36533		-0.621742	0.061613
-0.581472	-0.73801		-0.581084	0.089723		-0.581114	0.03992		-0.580865	-0.014073		-0.580902	0.006032		-0.581378	1.36686		-0.621137	0.061645
-0.580806	-0.73738		-0.580418	0.090177		-0.580448	0.040126		-0.580199	-0.014193		-0.580236	0.005346		-0.580712	1.36779		-0.620531	0.060738
-0.580141	-0.737032		-0.579753	0.090126		-0.579782	0.0394		-0.579533	-0.013603		-0.579571	0.004529		-0.580046	1.36882		-0.619926	0.060001
-0.579475	-0.737597		-0.579087	0.090783		-0.579116	0.038534		-0.578867	-0.014446		-0.578906	0.003867		-0.57938	1.37019		-0.61932	0.059962
-0.57881	-0.738624		-0.578422	0.0908		-0.57845	0.03716		-0.578201	-0.014823		-0.578241	0.004173		-0.578714	1.37211		-0.618715	0.059664
-0.578144	-0.739364		-0.577756	0.090584		-0.577784	0.036165		-0.577535	-0.015253		-0.577576	0.004189		-0.578048	1.37433		-0.618109	0.059615
-0.577479	-0.740034		-0.577091	0.089539		-0.577118	0.03624		-0.576869	-0.015121		-0.576911	0.004441		-0.577382	1.37621		-0.617504	0.058898
-0.576813	-0.740481		-0.576425	0.090253		-0.576452	0.035561		-0.576203	-0.01565		-0.576245	0.00481		-0.576716	1.37826		-0.616898	0.059203
-0.576148	-0.740877		-0.57576	0.089973		-0.575786	0.036208		-0.575537	-0.016078		-0.57558	0.005094		-0.57605	1.38041		-0.616293	0.05869
-0.575482	-0.741696		-0.575094	0.089253		-0.57512	0.036305		-0.574871	-0.016561		-0.574915	0.005608		-0.575384	1.3824		-0.615687	0.059205
-0.574817	-0.742387		-0.574429	0.089514		-0.574454	0.035436		-0.574205	-0.016521		-0.57425	0.005527		-0.574718	1.38404		-0.615082	0.059488
-0.574151	-0.743289		-0.573763	0.090127		-0.573788	0.035528		-0.573539	-0.016276		-0.573585	0.004728		-0.574052	1.38558		-0.614476	0.0591
-0.573486	-0.744694		-0.573097	0.089822		-0.573122	0.035105		-0.572873	-0.017824		-0.572919	0.004203		-0.573386	1.38775		-0.613871	0.05841
-0.57282	-0.745842		-0.572432	0.090414		-0.572456	0.03494		-0.572208	-0.018865		-0.572254	0.004313		-0.57272	1.3897		-0.613265	0.057612
-0.572155	-0.746405		-0.571766	0.089566		-0.57179	0.034429		-0.571542	-0.019399		-0.571589	0.00469		-0.572054	1.39061		-0.61266	0.057226
-0.571489	-0.747133		-0.571101	0.088809		-0.571124	0.034597		-0.570876	-0.019891		-0.570924	0.00362		-0.571388	1.39196		-0.612054	0.057479
-0.570824	-0.747632		-0.570435	0.088893		-0.570458	0.033722		-0.57021	-0.01972		-0.570259	0.002918		-0.570722	1.39438		-0.611449	0.05758
-0.570158	-0.747834		-0.56977	0.088975		-0.569792	0.034028		-0.569544	-0.020881		-0.569593	0.003135		-0.570056	1.39616		-0.610843	0.057905
-0.569492	-0.747862		-0.569104	0.088926		-0.569126	0.033883		-0.568878	-0.021408		-0.568928	0.003686		-0.56939	1.39795		-0.610238	0.058171
-0.568827	-0.748449		-0.568439	0.088213		-0.56846	0.032092		-0.568212	-0.021259		-0.568263	0.004244		-0.568724	1.3993		-0.609632	0.059126
-0.568161	-0.750117		-0.567773	0.087767		-0.567794	0.033094		-0.567546	-0.021359		-0.567598	0.004442		-0.568058	1.40087		-0.609027	0.059009
-0.567496	-0.750879		-0.567107	0.087704		-0.567128	0.03348		-0.56688	-0.021067		-0.566933	0.004285		-0.567392	1.40257		-0.608421	0.059673
-0.56683	-0.751475		-0.566442	0.087885		-0.566462	0.034181		-0.566214	-0.021953		-0.566267	0.004209		-0.566726	1.40495		-0.607816	0.060202
-0.566165	-0.752319		-0.565776	0.086167		-0.565796	0.034291		-0.565548	-0.022735		-0.565602	0.003608		-0.56606	1.40677		-0.60721	0.060453
-0.565499	-0.752157		-0.565111	0.086207		-0.56513	0.033379		-0.564882	-0.022531		-0.564937	0.003594		-0.565394	1.40856		-0.606605	0.060583
-0.564834	-0.75156		-0.564445	0.086398		-0.564464	0.032452		-0.564216	-0.02385		-0.564272	0.003941		-0.564728	1.41113		-0.605999	0.060758
-0.564168	-0.751563		-0.56378	0.087316		-0.563798	0.033679		-0.56355	-0.024177		-0.563607	0.003251		-0.564062	1.41286		-0.605394	0.060756
-0.563503	-0.751764		-0.563114	0.085581		-0.563132	0.03403		-0.562884	-0.024215		-0.562942	0.002157		-0.563396	1.41497		-0.604788	0.060129
-0.562837	-0.751756		-0.562449	0.085027		-0.562466	0.034106		-0.562218	-0.024703		-0.562276	0.001468		-0.56273	1.41563		-0.604183	0.059325
-0.562172	-0.752237		-0.561783	0.084623		-0.5618	0.033441		-0.561552	-0.025333		-0.561611	0.00102		-0.562064	1.41617		-0.603577	0.059052
-0.561506	-0.75253		-0.561118	0.085165		-0.561134	0.034039		-0.560886	-0.025444		-0.560946	0.000282		-0.561398	1.41754		-0.602972	0.058869
-0.560841	-0.752162		-0.560452	0.084149		-0.560468	0.033451		-0.56022	-0.027244		-0.560281	-0.000753		-0.560732	1.41889		-0.602366	0.058347
-0.560175	-0.751818		-0.559786	0.083946		-0.559802	0.033211		-0.559554	-0.028006		-0.559616	-0.001355		-0.560066	1.42011		-0.601761	0.058341
-0.55951	-0.752264		-0.559121	0.083981		-0.559137	0.033295		-0.558888	-0.028624		-0.55895	-0.001616		-0.5594	1.4217		-0.601155	0.058376
-0.558844	-0.753013		-0.558455	0.084126		-0.55847	0.033245		-0.558222	-0.028553		-0.558285	-0.002043		-0.558734	1.42226		-0.60055	0.05801
-0.558178	-0.753306		-0.55779	0.083401		-0.557804	0.032155		-0.557556	-0.02802		-0.55762	-0.002683		-0.558068	1.42341		-0.599944	0.057753
-0.557513	-0.753127		-0.557124	0.083274		-0.557139	0.032886		-0.55689	-0.028725		-0.556955	-0.002772		-0.557402	1.42451		-0.599339	0.057549
-0.556847	-0.752846		-0.556459	0.082647		-0.556473	0.033237		-0.556224	-0.028601		-0.55629	-0.002428		-0.556736	1.42657		-0.598733	0.057323
-0.556182	-0.75282		-0.555793	0.081816		-0.555807	0.031196		-0.555558	-0.028583		-0.555624	-0.002431		-0.55607	1.42924		-0.598128	0.057318
-0.555516	-0.753389		-0.555128	0.082079		-0.55514	0.032005		-0.554892	-0.029042		-0.554959	-0.003266		-0.555404	1.43162		-0.597522	0.057042
-0.554851	-0.754662		-0.554462	0.082328		-0.554475	0.031964		-0.554226	-0.029795		-0.554294	-0.003672		-0.554738	1.43262		-0.596917	0.056271
-0.554185	-0.755646		-0.553797	0.082989		-0.553809	0.032222		-0.55356	-0.029831		-0.553629	-0.004548		-0.554072	1.43458		-0.596311	0.055829
-0.55352	-0.756253		-0.553131	0.084276		-0.553143	0.032355		-0.552894	-0.03039		-0.552964	-0.005499		-0.553406	1.43642		-0.595706	0.056117
-0.552854	-0.756721		-0.552465	0.084422		-0.552477	0.032128		-0.552228	-0.030286		-0.552299	-0.006588		-0.55274	1.43799		-0.5951	0.055371
-0.552189	-0.75721		-0.5518	0.084584		-0.551811	0.031909		-0.551562	-0.031068		-0.551633	-0.006706		-0.552074	1.43928		-0.594495	0.055825
-0.551523	-0.758019		-0.551134	0.085154		-0.551145	0.032021		-0.550896	-0.031207		-0.550968	-0.006389		-0.551408	1.44149		-0.593889	0.055544
-0.550858	-0.758889		-0.550469	0.085124		-0.550479	0.03224		-0.55023	-0.030214		-0.550303	-0.00669		-0.550742	1.44328		-0.593284	0.054822
-0.550192	-0.760157		-0.549803	0.085383		-0.549813	0.03273		-0.549564	-0.030069		-0.549638	-0.006307		-0.550076	1.44509		-0.592678	0.054542
-0.549527	-0.76111		-0.549138	0.084888		-0.549147	0.032688		-0.548898	-0.030728		-0.548973	-0.005749		-0.54941	1.44751		-0.592073	0.054756
-0.548861	-0.761956		-0.548472	0.084219		-0.548481	0.031874		-0.548232	-0.031207		-0.548307	-0.006298		-0.548744	1.44895		-0.591467	0.054861
-0.548195	-0.762199		-0.547807	0.083794		-0.547815	0.032145		-0.547566	-0.031475		-0.547642	-0.006303		-0.548078	1.45062		-0.590862	0.054569
-0.54753	-0.762967		-0.547141	0.083347		-0.547149	0.031927		-0.5469	-0.030925		-0.546977	-0.006514		-0.547412	1.45268		-0.590256	0.054239
-0.546864	-0.764007		-0.546475	0.082833		-0.546483	0.032285		-0.546234	-0.031122		-0.546312	-0.006675		-0.546746	1.45521		-0.589651	0.053592
-0.546199	-0.764131		-0.54581	0.081955		-0.545817	0.032736		-0.545568	-0.031014		-0.545647	-0.006568		-0.54608	1.45654		-0.589045	0.053531
-0.545533	-0.764155		-0.545144	0.080886		-0.545151	0.032806		-0.544902	-0.030852		-0.544981	-0.007317		-0.545414	1.45771		-0.58844	0.053235
-0.544868	-0.76557		-0.544479	0.0806		-0.544485	0.03343		-0.544236	-0.030444		-0.544316	-0.008045		-0.544748	1.45825		-0.587834	0.05312
-0.544202	-0.766043		-0.543813	0.081697		-0.543819	0.033509		-0.54357	-0.030386		-0.543651	-0.008604		-0.544082	1.45941		-0.587229	0.054469
-0.543537	-0.766383		-0.543148	0.082528		-0.543153	0.033712		-0.542904	-0.030717		-0.542986	-0.009709		-0.543416	1.46029		-0.586623	0.055216
-0.542871	-0.767204		-0.542482	0.082628		-0.542487	0.034274		-0.542238	-0.031233		-0.542321	-0.010531		-0.54275	1.4613		-0.586018	0.054961
-0.542206	-0.767683		-0.541817	0.082601		-0.541821	0.035147		-0.541572	-0.031504		-0.541656	-0.012214		-0.542084	1.4624		-0.585412	0.054924
-0.54154	-0.767974		-0.541151	0.081894		-0.541155	0.035369		-0.540907	-0.032763		-0.54099	-0.01333		-0.541418	1.46412		-0.584807	0.055579
-0.540875	-0.768265		-0.540486	0.081297		-0.540489	0.03429		-0.540241	-0.034218		-0.540325	-0.013599		-0.540752	1.46586		-0.584201	0.056285
-0.540209	-0.768667		-0.53982	0.080598		-0.539823	0.033017		-0.539575	-0.034107		-0.53966	-0.013712		-0.540086	1.46702		-0.583596	0.056739
-0.539544	-0.768795		-0.539154	0.079516		-0.539157	0.032958		-0.538909	-0.033346		-0.538995	-0.013201		-0.53942	1.46895		-0.58299	0.056855
-0.538878	-0.76956		-0.538489	0.080063		-0.538491	0.033459		-0.538243	-0.033488		-0.53833	-0.013811		-0.538754	1.47151		-0.582385	0.056848
-0.538213	-0.76985		-0.537823	0.080522		-0.537825	0.033298		-0.537577	-0.033231		-0.537664	-0.013281		-0.538088	1.47333		-0.581779	0.056372
-0.537547	-0.769034		-0.537158	0.080556		-0.537159	0.033545		-0.536911	-0.033385		-0.536999	-0.013879		-0.537422	1.47466		-0.581174	0.056802
-0.536881	-0.769575		-0.536492	0.079708		-0.536493	0.033591		-0.536245	-0.032904		-0.536334	-0.013947		-0.536756	1.47637		-0.580568	0.056842
-0.536216	-0.770378		-0.535827	0.079469		-0.535827	0.033419		-0.535579	-0.032003		-0.535669	-0.014145		-0.53609	1.47732		-0.579963	0.057468
-0.53555	-0.771834		-0.535161	0.079191		-0.535161	0.034136		-0.534913	-0.03322		-0.535004	-0.014837		-0.535424	1.47858		-0.579357	0.057836
-0.534885	-0.772345		-0.534496	0.079527		-0.534495	0.033353		-0.534247	-0.033841		-0.534338	-0.015627		-0.534758	1.48		-0.578752	0.057617
-0.534219	-0.773297		-0.53383	0.079614		-0.533829	0.031911		-0.533581	-0.034328		-0.533673	-0.017083		-0.534092	1.48167		-0.578146	0.057132
-0.533554	-0.773695		-0.533165	0.079062		-0.533163	0.030663		-0.532915	-0.034434		-0.533008	-0.01855		-0.533426	1.48325		-0.577541	0.056399
-0.532888	-0.77352		-0.532499	0.079835		-0.532497	0.030376		-0.532249	-0.033579		-0.532343	-0.01856		-0.53276	1.48516		-0.576935	0.05562
-0.532223	-0.773668		-0.531833	0.079685		-0.531831	0.03157		-0.531583	-0.034168		-0.531678	-0.018995		-0.532094	1.4864		-0.57633	0.054276
-0.531557	-0.7745		-0.531168	0.079401		-0.531165	0.032059		-0.530917	-0.033656		-0.531013	-0.021024		-0.531428	1.48735		-0.575724	0.053997
-0.530892	-0.775551		-0.530502	0.078838		-0.530499	0.031921		-0.530251	-0.033148		-0.530347	-0.021422		-0.530762	1.48917		-0.575119	0.053531
-0.530226	-0.775644		-0.529837	0.079187		-0.529833	0.031219		-0.529585	-0.033344		-0.529682	-0.020626		-0.530096	1.49063		-0.574513	0.052983
-0.529561	-0.776097		-0.529171	0.079858		-0.529167	0.030595		-0.528919	-0.032149		-0.529017	-0.020602		-0.52943	1.49193		-0.573908	0.052896
-0.528895	-0.77696		-0.528506	0.079564		-0.528501	0.03142		-0.528253	-0.03233		-0.528352	-0.021153		-0.528764	1.494		-0.573302	0.053467
-0.52823	-0.777422		-0.52784	0.07929		-0.527835	0.031649		-0.527587	-0.03195		-0.527687	-0.021726		-0.528098	1.49583		-0.572697	0.053518
-0.527564	-0.778394		-0.527174	0.079764		-0.527169	0.031939		-0.526921	-0.031602		-0.527021	-0.022332		-0.527432	1.49725		-0.572091	0.053781
-0.526899	-0.779322		-0.526509	0.08099		-0.526503	0.032039		-0.526255	-0.032241		-0.526356	-0.022256		-0.526766	1.49856		-0.571486	0.054309
-0.526233	-0.779349		-0.525843	0.081601		-0.525837	0.031604		-0.525589	-0.03173		-0.525691	-0.022521		-0.5261	1.50022		-0.57088	0.054583
-0.525567	-0.779423		-0.525178	0.081003		-0.525171	0.031524		-0.524923	-0.030822		-0.525026	-0.021477		-0.525434	1.50168		-0.570275	0.055591
-0.524902	-0.779972		-0.524512	0.081206		-0.524505	0.032635		-0.524257	-0.031224		-0.524361	-0.021757		-0.524768	1.50252		-0.569669	0.055627
-0.524236	-0.780488		-0.523847	0.081446		-0.523839	0.032207		-0.523591	-0.03125		-0.523695	-0.021877		-0.524102	1.50356		-0.569064	0.056346
-0.523571	-0.780874		-0.523181	0.081599		-0.523173	0.031947		-0.522925	-0.03132		-0.52303	-0.022613		-0.523436	1.50493		-0.568458	0.056464
-0.522905	-0.781774		-0.522516	0.08103		-0.522507	0.032568		-0.522259	-0.032072		-0.522365	-0.022674		-0.52277	1.50578		-0.567853	0.056761
-0.52224	-0.782168		-0.52185	0.081193		-0.521841	0.032168		-0.521593	-0.032095		-0.5217	-0.021877		-0.522104	1.50679		-0.567247	0.057852
-0.521574	-0.782319		-0.521185	0.08114		-0.521175	0.032627		-0.520927	-0.03141		-0.521035	-0.021251		-0.521438	1.50784		-0.566642	0.058956
-0.520909	-0.7827		-0.520519	0.080117		-0.520509	0.03256		-0.520261	-0.031787		-0.520369	-0.021222		-0.520772	1.5084		-0.566036	0.059197
-0.520243	-0.783412		-0.519853	0.078869		-0.519843	0.033094		-0.519595	-0.031696		-0.519704	-0.020811		-0.520106	1.50896		-0.565431	0.058932
-0.519578	-0.783796		-0.519188	0.078352		-0.519177	0.033475		-0.518929	-0.031697		-0.519039	-0.019801		-0.51944	1.50963		-0.564825	0.059153
-0.518912	-0.78486		-0.518522	0.077498		-0.518511	0.033083		-0.518263	-0.031095		-0.518374	-0.019592		-0.518774	1.51182		-0.56422	0.059535
-0.518247	-0.786038		-0.517857	0.07747		-0.517845	0.032477		-0.517597	-0.03043		-0.517709	-0.019411		-0.518108	1.51281		-0.563614	0.060706
-0.517581	-0.786938		-0.517191	0.07838		-0.517179	0.032399		-0.516931	-0.031275		-0.517044	-0.019235		-0.517442	1.5139		-0.563009	0.060711
-0.516916	-0.787066		-0.516526	0.078625		-0.516513	0.032073		-0.516265	-0.032317		-0.516378	-0.019716		-0.516776	1.51531		-0.562403	0.059993
-0.51625	-0.786916		-0.51586	0.079439		-0.515847	0.031102		-0.515599	-0.032122		-0.515713	-0.020784		-0.51611	1.51458		-0.561797	0.060413
-0.515584	-0.786413		-0.515195	0.080886		-0.515181	0.031373		-0.514933	-0.032225		-0.515048	-0.020724		-0.515444	1.51671		-0.561192	0.061324
-0.514919	-0.786516		-0.514529	0.081247		-0.514515	0.029653		-0.514267	-0.032397		-0.514383	-0.021795		-0.514778	1.51798		-0.560587	0.062072
-0.514253	-0.786915		-0.513864	0.080883		-0.513849	0.029411		-0.513601	-0.033247		-0.513718	-0.022014		-0.514112	1.51898		-0.559981	0.063171
-0.513588	-0.787097		-0.513198	0.080594		-0.513183	0.028734		-0.512935	-0.032777		-0.513052	-0.021331		-0.513446	1.51925		-0.559376	0.064156
-0.512922	-0.787965		-0.512532	0.081103		-0.512517	0.027243		-0.512269	-0.031999		-0.512387	-0.021085		-0.51278	1.52043		-0.55877	0.063357
-0.512257	-0.788533		-0.511867	0.081385		-0.511851	0.02765		-0.511603	-0.031599		-0.511722	-0.021303		-0.512114	1.52243		-0.558164	0.062839
-0.511591	-0.788758		-0.511201	0.080929		-0.511185	0.027203		-0.510937	-0.030983		-0.511057	-0.02143		-0.511448	1.52347		-0.557559	0.062509
-0.510926	-0.789394		-0.510536	0.080172		-0.510519	0.026774		-0.510271	-0.031585		-0.510392	-0.021732		-0.510782	1.52513		-0.556954	0.063783
-0.51026	-0.789778		-0.50987	0.079533		-0.509853	0.026186		-0.509605	-0.032241		-0.509726	-0.021307		-0.510116	1.52667		-0.556348	0.063952
-0.509595	-0.789908		-0.509205	0.079468		-0.509187	0.025331		-0.50894	-0.031678		-0.509061	-0.020852		-0.50945	1.52823		-0.555743	0.064634
-0.508929	-0.789963		-0.508539	0.079414		-0.508521	0.023945		-0.508274	-0.031483		-0.508396	-0.020256		-0.508784	1.52955		-0.555137	0.064704
-0.508264	-0.789932		-0.507874	0.079753		-0.507855	0.023576		-0.507608	-0.030142		-0.507731	-0.018817		-0.508118	1.52993		-0.554531	0.064311
-0.507598	-0.79031		-0.507208	0.080715		-0.507189	0.024171		-0.506942	-0.028711		-0.507066	-0.017906		-0.507452	1.53047		-0.553926	0.063389
-0.506933	-0.790708		-0.506542	0.080785		-0.506523	0.024278		-0.506276	-0.027625		-0.506401	-0.017195		-0.506786	1.53164		-0.553321	0.06237
-0.506267	-0.791267		-0.505877	0.080596		-0.505857	0.024112		-0.50561	-0.028163		-0.505735	-0.018082		-0.50612	1.53237		-0.552715	0.062191
-0.505602	-0.791712		-0.505211	0.079857		-0.505191	0.02398		-0.504944	-0.028161		-0.50507	-0.018752		-0.505454	1.53282		-0.552109	0.062544
-0.504936	-0.7921		-0.504546	0.079579		-0.504525	0.023866		-0.504278	-0.028383		-0.504405	-0.018882		-0.504788	1.53367		-0.551504	0.061786
-0.50427	-0.792777		-0.50388	0.079224		-0.503859	0.024075		-0.503612	-0.029035		-0.50374	-0.019087		-0.504122	1.53434		-0.550898	0.060787
-0.503605	-0.793234		-0.503215	0.079483		-0.503193	0.022913		-0.502946	-0.028656		-0.503075	-0.019358		-0.503456	1.53461		-0.550293	0.059934
-0.502939	-0.793481		-0.502549	0.079597		-0.502527	0.022053		-0.50228	-0.030015		-0.502409	-0.020414		-0.50279	1.536		-0.549688	0.060127
-0.502274	-0.793556		-0.501884	0.079293		-0.501861	0.021201		-0.501614	-0.028742		-0.501744	-0.02196		-0.502124	1.53763		-0.549082	0.060134
-0.501608	-0.793		-0.501218	0.079058		-0.501195	0.020861		-0.500948	-0.028196		-0.501079	-0.022941		-0.501458	1.53867		-0.548476	0.060178
-0.500943	-0.792905		-0.500553	0.078715		-0.500529	0.021494		-0.500282	-0.027797		-0.500414	-0.022466		-0.500792	1.53899		-0.547871	0.059859
-0.500277	-0.793921		-0.499887	0.079002		-0.499863	0.02213		-0.499616	-0.028315		-0.499749	-0.022657		-0.500126	1.53961		-0.547265	0.06006
-0.499612	-0.794396		-0.499221	0.078706		-0.499197	0.022672		-0.49895	-0.029067		-0.499083	-0.023242		-0.49946	1.54062		-0.54666	0.060229
-0.498946	-0.794853		-0.498556	0.078942		-0.498531	0.022314		-0.498284	-0.028729		-0.498418	-0.02254		-0.498794	1.54129		-0.546054	0.059948
-0.498281	-0.795815		-0.49789	0.078996		-0.497865	0.022158		-0.497618	-0.028049		-0.497753	-0.022109		-0.498128	1.54259		-0.545449	0.060216
-0.497615	-0.796227		-0.497225	0.079114		-0.497199	0.021901		-0.496952	-0.027661		-0.497088	-0.022569		-0.497462	1.54339		-0.544843	0.061082
-0.49695	-0.797471		-0.496559	0.079545		-0.496533	0.021659		-0.496286	-0.028231		-0.496423	-0.023505		-0.496796	1.54419		-0.544238	0.062347
-0.496284	-0.798178		-0.495894	0.0793		-0.495867	0.021871		-0.49562	-0.028788		-0.495758	-0.023236		-0.49613	1.546		-0.543632	0.062765
-0.495619	-0.798607		-0.495228	0.078953		-0.495201	0.021297		-0.494954	-0.028447		-0.495092	-0.023291		-0.495464	1.54696		-0.543027	0.063971
-0.494953	-0.799057		-0.494563	0.079465		-0.494535	0.020802		-0.494288	-0.028402		-0.494427	-0.023668		-0.494798	1.54776		-0.542421	0.064606
-0.494287	-0.799528		-0.493897	0.079989		-0.493869	0.020695		-0.493622	-0.028125		-0.493762	-0.023201		-0.494132	1.54948		-0.541816	0.064545
-0.493622	-0.800083		-0.493231	0.079518		-0.493203	0.01965		-0.492956	-0.028265		-0.493097	-0.023446		-0.493466	1.55065		-0.54121	0.06526
-0.492956	-0.801253		-0.492566	0.078892		-0.492537	0.01863		-0.49229	-0.028628		-0.492432	-0.023667		-0.4928	1.5516		-0.540605	0.065609
-0.492291	-0.800894		-0.4919	0.078978		-0.491871	0.018145		-0.491624	-0.028662		-0.491766	-0.02463		-0.492134	1.55308		-0.539999	0.065077
-0.491625	-0.800388		-0.491235	0.079304		-0.491206	0.017804		-0.490958	-0.028544		-0.491101	-0.024749		-0.491468	1.55485		-0.539394	0.064869
-0.49096	-0.801972		-0.490569	0.07919		-0.49054	0.017612		-0.490292	-0.028395		-0.490436	-0.024572		-0.490802	1.55669		-0.538788	0.065207
-0.490294	-0.802904		-0.489904	0.079446		-0.489874	0.017196		-0.489626	-0.02729		-0.489771	-0.023981		-0.490136	1.55788		-0.538183	0.06475
-0.489629	-0.803095		-0.489238	0.080232		-0.489208	0.016978		-0.48896	-0.027753		-0.489106	-0.024849		-0.48947	1.55953		-0.537577	0.065127
-0.488963	-0.803271		-0.488573	0.079739		-0.488542	0.016934		-0.488294	-0.027291		-0.48844	-0.025551		-0.488804	1.56061		-0.536972	0.064859
-0.488298	-0.803261		-0.487907	0.079314		-0.487876	0.016768		-0.487628	-0.027864		-0.487775	-0.026238		-0.488138	1.56253		-0.536366	0.065296
-0.487632	-0.803412		-0.487242	0.079656		-0.48721	0.017373		-0.486962	-0.028339		-0.48711	-0.026192		-0.487472	1.56464		-0.535761	0.064746
-0.486967	-0.803189		-0.486576	0.079551		-0.486544	0.017336		-0.486296	-0.028174		-0.486445	-0.026808		-0.486806	1.56681		-0.535155	0.064988
-0.486301	-0.803343		-0.48591	0.079705		-0.485878	0.016808		-0.48563	-0.028741		-0.48578	-0.026649		-0.48614	1.56859		-0.53455	0.064619
-0.485636	-0.803245		-0.485245	0.080443		-0.485212	0.016911		-0.484964	-0.029234		-0.485115	-0.027595		-0.485474	1.56975		-0.533944	0.064527
-0.48497	-0.80266		-0.484579	0.079891		-0.484546	0.016873		-0.484298	-0.02961		-0.484449	-0.028385		-0.484808	1.57077		-0.533339	0.064892
-0.484304	-0.802546		-0.483914	0.078702		-0.48388	0.016474		-0.483632	-0.029213		-0.483784	-0.028796		-0.484142	1.57223		-0.532733	0.065289
-0.483639	-0.802121		-0.483248	0.078182		-0.483214	0.015801		-0.482966	-0.029182		-0.483119	-0.029198		-0.483476	1.57337		-0.532128	0.065536
-0.482973	-0.802232		-0.482583	0.07837		-0.482548	0.016432		-0.4823	-0.02911		-0.482454	-0.028347		-0.48281	1.57538		-0.531522	0.065762
-0.482308	-0.802309		-0.481917	0.07748		-0.481882	0.016484		-0.481634	-0.029102		-0.481789	-0.027737		-0.482144	1.57626		-0.530917	0.066014
-0.481642	-0.803033		-0.481252	0.077423		-0.481216	0.017209		-0.480968	-0.028544		-0.481123	-0.027355		-0.481478	1.57743		-0.530311	0.065689
-0.480977	-0.80304		-0.480586	0.078032		-0.48055	0.017913		-0.480302	-0.028742		-0.480458	-0.027009		-0.480812	1.57859		-0.529706	0.066145
-0.480311	-0.803651		-0.479921	0.078434		-0.479884	0.017853		-0.479636	-0.028754		-0.479793	-0.028245		-0.480146	1.57994		-0.5291	0.066925
-0.479646	-0.803382		-0.479255	0.078658		-0.479218	0.018566		-0.47897	-0.029546		-0.479128	-0.029036		-0.47948	1.58091		-0.528495	0.066675
-0.47898	-0.802935		-0.478589	0.078335		-0.478552	0.018801		-0.478304	-0.030192		-0.478463	-0.028704		-0.478814	1.58187		-0.527889	0.066192
-0.478315	-0.802781		-0.477924	0.077633		-0.477886	0.018819		-0.477638	-0.030959		-0.477797	-0.029095		-0.478148	1.584		-0.527284	0.065889
-0.477649	-0.80293		-0.477258	0.076949		-0.47722	0.018887		-0.476973	-0.03087		-0.477132	-0.029244		-0.477482	1.58521		-0.526678	0.066042
-0.476984	-0.802926		-0.476593	0.077259		-0.476554	0.018897		-0.476306	-0.030709		-0.476467	-0.029735		-0.476816	1.58637		-0.526073	0.066778
-0.476318	-0.803332		-0.475927	0.077283		-0.475888	0.0189		-0.475641	-0.030703		-0.475802	-0.030497		-0.47615	1.58733		-0.525467	0.067559
-0.475653	-0.803199		-0.475262	0.077564		-0.475222	0.019734		-0.474975	-0.031017		-0.475137	-0.031088		-0.475484	1.58861		-0.524862	0.067857
-0.474987	-0.804213		-0.474596	0.077903		-0.474556	0.02057		-0.474309	-0.030498		-0.474471	-0.032192		-0.474818	1.59049		-0.524256	0.068069
-0.474322	-0.804526		-0.473931	0.077844		-0.47389	0.021013		-0.473643	-0.030768		-0.473806	-0.032894		-0.474152	1.5924		-0.523651	0.068251
-0.473656	-0.80424		-0.473265	0.078662		-0.473224	0.022152		-0.472977	-0.030715		-0.473141	-0.033971		-0.473486	1.59356		-0.523045	0.069391
-0.47299	-0.804752		-0.472599	0.079242		-0.472558	0.02222		-0.472311	-0.031029		-0.472476	-0.035254		-0.47282	1.59467		-0.52244	0.06825
-0.472325	-0.804315		-0.471934	0.07914		-0.471892	0.022269		-0.471645	-0.030985		-0.471811	-0.035287		-0.472154	1.59574		-0.521834	0.068723
-0.471659	-0.80438		-0.471268	0.078451		-0.471226	0.023211		-0.470979	-0.030793		-0.471146	-0.036628		-0.471488	1.59724		-0.521229	0.069977
-0.470994	-0.805442		-0.470603	0.079503		-0.47056	0.023216		-0.470313	-0.030483		-0.47048	-0.035899		-0.470822	1.59869		-0.520623	0.07137
-0.470328	-0.805924		-0.469937	0.080333		-0.469894	0.023609		-0.469647	-0.030099		-0.469815	-0.035932		-0.470156	1.59989		-0.520018	0.072074
-0.469663	-0.806342		-0.469272	0.08096		-0.469228	0.023767		-0.468981	-0.029981		-0.46915	-0.036584		-0.46949	1.60108		-0.519412	0.072514
-0.468997	-0.80586		-0.468606	0.080607		-0.468562	0.024095		-0.468315	-0.030048		-0.468485	-0.034869		-0.468824	1.60223		-0.518807	0.073156
-0.468332	-0.806128		-0.467941	0.080272		-0.467896	0.024779		-0.467649	-0.030334		-0.46782	-0.034175		-0.468158	1.60363		-0.518201	0.074141
-0.467666	-0.806385		-0.467275	0.079917		-0.46723	0.02435		-0.466983	-0.030719		-0.467154	-0.033759		-0.467492	1.6044		-0.517596	0.075386
-0.467001	-0.806091		-0.466609	0.07907		-0.466564	0.023938		-0.466317	-0.030733		-0.466489	-0.033729		-0.466826	1.60571		-0.51699	0.075545
-0.466335	-0.806405		-0.465944	0.079259		-0.465898	0.023211		-0.465651	-0.030642		-0.465824	-0.033526		-0.46616	1.60653		-0.516385	0.075892
-0.46567	-0.806886		-0.465278	0.078695		-0.465232	0.02322		-0.464985	-0.030558		-0.465159	-0.033571		-0.465494	1.60765		-0.515779	0.076017
-0.465004	-0.807569		-0.464613	0.078183		-0.464566	0.023223		-0.464319	-0.031183		-0.464494	-0.034245		-0.464828	1.60905		-0.515174	0.076478
-0.464339	-0.807492		-0.463947	0.077623		-0.4639	0.023805		-0.463653	-0.031342		-0.463828	-0.034396		-0.464162	1.60978		-0.514568	0.077346
-0.463673	-0.807099		-0.463282	0.077778		-0.463234	0.023568		-0.462987	-0.031177		-0.463163	-0.033828		-0.463496	1.61139		-0.513963	0.078053
-0.463008	-0.806822		-0.462616	0.077703		-0.462568	0.023515		-0.462321	-0.031261		-0.462498	-0.034229		-0.46283	1.61281		-0.513357	0.078326
-0.462342	-0.806103		-0.461951	0.07796		-0.461902	0.024105		-0.461655	-0.031596		-0.461833	-0.034631		-0.462164	1.61375		-0.512752	0.078732
-0.461676	-0.806407		-0.461285	0.078524		-0.461236	0.024454		-0.460989	-0.032519		-0.461168	-0.033524		-0.461498	1.61548		-0.512146	0.079644
-0.461011	-0.807		-0.46062	0.078639		-0.46057	0.024845		-0.460323	-0.032635		-0.460503	-0.033402		-0.460832	1.61582		-0.511541	0.079032
-0.460345	-0.807416		-0.459954	0.078207		-0.459904	0.025218		-0.459657	-0.032683		-0.459837	-0.034126		-0.460166	1.61667		-0.510935	0.078442
-0.45968	-0.807799		-0.459288	0.078574		-0.459238	0.025167		-0.458991	-0.032246		-0.459172	-0.034441		-0.4595	1.61764		-0.51033	0.078435
-0.459014	-0.808716		-0.458623	0.079109		-0.458572	0.024572		-0.458325	-0.032837		-0.458507	-0.035135		-0.458834	1.61793		-0.509724	0.078017
-0.458349	-0.80954		-0.457957	0.079072		-0.457906	0.024202		-0.457659	-0.032669		-0.457842	-0.035189		-0.458168	1.6191		-0.509119	0.078375
-0.457683	-0.809602		-0.457292	0.078641		-0.45724	0.02381		-0.456993	-0.03187		-0.457177	-0.035724		-0.457502	1.61989		-0.508513	0.079301
-0.457018	-0.810084		-0.456626	0.078019		-0.456574	0.023781		-0.456327	-0.032668		-0.456511	-0.03668		-0.456836	1.62046		-0.507908	0.079671
-0.456352	-0.810438		-0.455961	0.077631		-0.455908	0.022846		-0.455661	-0.0327		-0.455846	-0.036757		-0.45617	1.62038		-0.507302	0.079856
-0.455687	-0.811252		-0.455295	0.078318		-0.455242	0.022501		-0.454995	-0.033159		-0.455181	-0.036326		-0.455504	1.62084		-0.506697	0.080673
-0.455021	-0.812011		-0.45463	0.078516		-0.454576	0.021949		-0.454329	-0.033061		-0.454516	-0.037397		-0.454838	1.62152		-0.506091	0.081187
-0.454356	-0.812621		-0.453964	0.078287		-0.45391	0.020791		-0.453663	-0.032377		-0.453851	-0.03862		-0.454172	1.62154		-0.505486	0.080905
-0.45369	-0.812927		-0.453299	0.078348		-0.453244	0.020862		-0.452997	-0.033014		-0.453185	-0.038244		-0.453506	1.62224		-0.50488	0.081763
-0.453025	-0.814163		-0.452633	0.078772		-0.452578	0.020989		-0.452331	-0.033537		-0.45252	-0.039002		-0.45284	1.62282		-0.504275	0.081266
-0.452359	-0.814417		-0.451967	0.078493		-0.451912	0.021814		-0.451665	-0.033176		-0.451855	-0.038465		-0.452174	1.62335		-0.503669	0.081113
-0.451693	-0.814644		-0.451302	0.07806		-0.451246	0.021881		-0.450999	-0.033716		-0.45119	-0.037682		-0.451508	1.62465		-0.503064	0.081409
-0.451028	-0.815034		-0.450636	0.078619		-0.45058	0.022463		-0.450333	-0.034307		-0.450525	-0.038414		-0.450842	1.6254		-0.502458	0.081871
-0.450362	-0.815998		-0.449971	0.079039		-0.449914	0.023265		-0.449667	-0.034683		-0.449859	-0.038646		-0.450176	1.62682		-0.501853	0.082098
-0.449697	-0.81691		-0.449305	0.079211		-0.449248	0.022667		-0.449001	-0.035308		-0.449194	-0.039491		-0.44951	1.62778		-0.501247	0.082235
-0.449031	-0.817621		-0.44864	0.07928		-0.448582	0.022675		-0.448335	-0.03439		-0.448529	-0.040661		-0.448844	1.62909		-0.500642	0.082272
-0.448366	-0.817772		-0.447974	0.078914		-0.447916	0.022463		-0.447669	-0.034293		-0.447864	-0.041646		-0.448178	1.62984		-0.500036	0.082151
-0.4477	-0.818417		-0.447309	0.077861		-0.44725	0.022004		-0.447003	-0.03387		-0.447199	-0.04305		-0.447512	1.63076		-0.499431	0.082234
-0.447035	-0.81842		-0.446643	0.077293		-0.446584	0.02166		-0.446337	-0.034822		-0.446534	-0.041816		-0.446846	1.63199		-0.498825	0.082707
-0.446369	-0.818584		-0.445977	0.076436		-0.445918	0.020886		-0.445671	-0.035409		-0.445868	-0.042312		-0.44618	1.6331		-0.49822	0.082796
-0.445704	-0.819547		-0.445312	0.075596		-0.445252	0.020517		-0.445005	-0.035388		-0.445203	-0.043379		-0.445514	1.63369		-0.497614	0.083639
-0.445038	-0.820291		-0.444646	0.076026		-0.444586	0.020724		-0.44434	-0.034962		-0.444538	-0.043828		-0.444848	1.63421		-0.497009	0.084025
-0.444373	-0.819864		-0.443981	0.076837		-0.44392	0.020817		-0.443674	-0.034523		-0.443873	-0.044544		-0.444182	1.635		-0.496403	0.085643
-0.443707	-0.820669		-0.443315	0.076666		-0.443254	0.021234		-0.443008	-0.034205		-0.443208	-0.0453		-0.443516	1.6358		-0.495798	0.086376
-0.443042	-0.820797		-0.44265	0.076398		-0.442588	0.021098		-0.442342	-0.034989		-0.442542	-0.046057		-0.44285	1.63642		-0.495192	0.086352
-0.442376	-0.821414		-0.441984	0.075859		-0.441922	0.020441		-0.441676	-0.034885		-0.441877	-0.045505		-0.442184	1.63705		-0.494587	0.086517
-0.441711	-0.821839		-0.441319	0.07544		-0.441256	0.019675		-0.44101	-0.035961		-0.441212	-0.04535		-0.441518	1.63746		-0.493981	0.087341
-0.441045	-0.822091		-0.440653	0.075262		-0.44059	0.018786		-0.440344	-0.036225		-0.440547	-0.04569		-0.440852	1.63779		-0.493376	0.088044
-0.440379	-0.822599		-0.439987	0.074803		-0.439924	0.018103		-0.439678	-0.037028		-0.439882	-0.045679		-0.440186	1.63868		-0.49277	0.088029
-0.439714	-0.822618		-0.439322	0.075334		-0.439258	0.018233		-0.439012	-0.036303		-0.439216	-0.044877		-0.43952	1.63978		-0.492165	0.088357
-0.439048	-0.823227		-0.438656	0.076108		-0.438592	0.017775		-0.438346	-0.036488		-0.438551	-0.04529		-0.438854	1.64045		-0.491559	0.089084
-0.438383	-0.823252		-0.437991	0.076332		-0.437926	0.01679		-0.43768	-0.036834		-0.437886	-0.044225		-0.438188	1.6406		-0.490954	0.089997
-0.437717	-0.822258		-0.437325	0.07576		-0.43726	0.016813		-0.437014	-0.037352		-0.437221	-0.045129		-0.437522	1.64182		-0.490348	0.090233
-0.437052	-0.822217		-0.43666	0.074852		-0.436594	0.016997		-0.436348	-0.038087		-0.436556	-0.045227		-0.436856	1.64307		-0.489743	0.090048
-0.436386	-0.821565		-0.435994	0.074358		-0.435928	0.017088		-0.435682	-0.038399		-0.43589	-0.04481		-0.43619	1.64366		-0.489137	0.090859
-0.435721	-0.821494		-0.435329	0.074408		-0.435262	0.017765		-0.435016	-0.038824		-0.435225	-0.045469		-0.435524	1.64387		-0.488532	0.091061
-0.435055	-0.821256		-0.434663	0.074834		-0.434596	0.018574		-0.43435	-0.038473		-0.43456	-0.045419		-0.434858	1.64434		-0.487926	0.090777
-0.43439	-0.821389		-0.433998	0.075226		-0.43393	0.019047		-0.433684	-0.03836		-0.433895	-0.045699		-0.434192	1.64568		-0.487321	0.09073
-0.433724	-0.821307		-0.433332	0.075181		-0.433264	0.018821		-0.433018	-0.037648		-0.43323	-0.045926		-0.433526	1.64676		-0.486715	0.091187
-0.433059	-0.821278		-0.432666	0.074891		-0.432598	0.01889		-0.432352	-0.037181		-0.432565	-0.04681		-0.43286	1.64755		-0.48611	0.091688
-0.432393	-0.821493		-0.432001	0.074812		-0.431932	0.018831		-0.431686	-0.036961		-0.431899	-0.047581		-0.432194	1.64865		-0.485504	0.091909
-0.431728	-0.821355		-0.431335	0.075187		-0.431266	0.017968		-0.43102	-0.036846		-0.431234	-0.046844		-0.431528	1.64938		-0.484899	0.092432
-0.431062	-0.821937		-0.43067	0.075913		-0.4306	0.01682		-0.430354	-0.036937		-0.430569	-0.046392		-0.430862	1.64974		-0.484293	0.092832
-0.430396	-0.82242		-0.430004	0.075722		-0.429934	0.01601		-0.429688	-0.036904		-0.429904	-0.046868		-0.430196	1.64983		-0.483688	0.093709
-0.429731	-0.823088		-0.429339	0.075209		-0.429268	0.015817		-0.429022	-0.037201		-0.429239	-0.047065		-0.42953	1.64984		-0.483082	0.094569
-0.429065	-0.823715		-0.428673	0.075151		-0.428602	0.015729		-0.428356	-0.03693		-0.428573	-0.046641		-0.428864	1.65006		-0.482477	0.094994
-0.4284	-0.824722		-0.428008	0.074522		-0.427936	0.015855		-0.42769	-0.036991		-0.427908	-0.047199		-0.428198	1.64942		-0.481871	0.095187
-0.427734	-0.824803		-0.427342	0.073557		-0.42727	0.015776		-0.427024	-0.037936		-0.427243	-0.048415		-0.427532	1.65016		-0.481266	0.095261
-0.427069	-0.824096		-0.426677	0.073453		-0.426605	0.016359		-0.426358	-0.0365		-0.426578	-0.048265		-0.426866	1.6505		-0.48066	0.095191
-0.426403	-0.823237		-0.426011	0.073257		-0.425938	0.017125		-0.425692	-0.037598		-0.425913	-0.048571		-0.4262	1.65164		-0.480055	0.095154
-0.425738	-0.822286		-0.425345	0.073174		-0.425273	0.017257		-0.425026	-0.037164		-0.425247	-0.048678		-0.425534	1.65287		-0.479449	0.094914
-0.425072	-0.822377		-0.42468	0.07374		-0.424607	0.017054		-0.42436	-0.037331		-0.424582	-0.048906		-0.424868	1.65313		-0.478844	0.094736
-0.424407	-0.822484		-0.424014	0.07436		-0.423941	0.01734		-0.423694	-0.038652		-0.423917	-0.048582		-0.424202	1.65404		-0.478238	0.095754
-0.423741	-0.821765		-0.423349	0.074629		-0.423275	0.017409		-0.423028	-0.039289		-0.423252	-0.048596		-0.423536	1.65554		-0.477633	0.096387
-0.423076	-0.821878		-0.422683	0.074586		-0.422609	0.01783		-0.422362	-0.038911		-0.422587	-0.048896		-0.42287	1.65721		-0.477027	0.09769
-0.42241	-0.82234		-0.422018	0.074008		-0.421943	0.018393		-0.421696	-0.038704		-0.421922	-0.049249		-0.422204	1.65866		-0.476422	0.098806
-0.421745	-0.823052		-0.421352	0.073433		-0.421277	0.018265		-0.42103	-0.040037		-0.421256	-0.048661		-0.421538	1.65987		-0.475816	0.098777
-0.421079	-0.822356		-0.420687	0.073989		-0.420611	0.017835		-0.420364	-0.040887		-0.420591	-0.047928		-0.420872	1.66157		-0.475211	0.098821
-0.420413	-0.822945		-0.420021	0.074187		-0.419945	0.017137		-0.419698	-0.040869		-0.419926	-0.047379		-0.420206	1.6623		-0.474605	0.098973
-0.419748	-0.822916		-0.419355	0.073315		-0.419279	0.016153		-0.419032	-0.041098		-0.419261	-0.047824		-0.41954	1.66279		-0.474	0.099514
-0.419082	-0.823086		-0.41869	0.072994		-0.418613	0.014858		-0.418366	-0.042214		-0.418596	-0.048486		-0.418874	1.663		-0.473394	0.100196
-0.418417	-0.824029		-0.418024	0.073321		-0.417947	0.014129		-0.4177	-0.042848		-0.41793	-0.048764		-0.418208	1.6638		-0.472789	0.10085
-0.417751	-0.824551		-0.417359	0.073128		-0.417281	0.01381		-0.417034	-0.04284		-0.417265	-0.048801		-0.417542	1.66431		-0.472183	0.101292
-0.417086	-0.824968		-0.416693	0.072159		-0.416615	0.013711		-0.416368	-0.042396		-0.4166	-0.048643		-0.416876	1.66412		-0.471578	0.101535
-0.41642	-0.825233		-0.416028	0.071584		-0.415949	0.014322		-0.415702	-0.042389		-0.415935	-0.048282		-0.41621	1.66429		-0.470972	0.102867
-0.415755	-0.825581		-0.415362	0.071742		-0.415283	0.014306		-0.415036	-0.043041		-0.41527	-0.047552		-0.415544	1.66454		-0.470367	0.103806
-0.415089	-0.82597		-0.414697	0.072366		-0.414617	0.014082		-0.41437	-0.043509		-0.414604	-0.045818		-0.414878	1.66494		-0.469761	0.104079
-0.414424	-0.826297		-0.414031	0.072403		-0.413951	0.013634		-0.413704	-0.043105		-0.413939	-0.045351		-0.414212	1.66538		-0.469156	0.104389
-0.413758	-0.827134		-0.413365	0.072525		-0.413285	0.013299		-0.413038	-0.042779		-0.413274	-0.046066		-0.413546	1.66614		-0.46855	0.105043
-0.413093	-0.827043		-0.4127	0.073077		-0.412619	0.013965		-0.412373	-0.042132		-0.412609	-0.045927		-0.41288	1.66602		-0.467945	0.105754
-0.412427	-0.826906		-0.412034	0.073418		-0.411953	0.013722		-0.411707	-0.042558		-0.411944	-0.045897		-0.412214	1.66695		-0.467339	0.106487
-0.411762	-0.826499		-0.411369	0.073226		-0.411287	0.01298		-0.411041	-0.043173		-0.411279	-0.046138		-0.411548	1.66709		-0.466734	0.107318
-0.411096	-0.826306		-0.410703	0.07318		-0.410621	0.012549		-0.410375	-0.043783		-0.410613	-0.045786		-0.410882	1.66713		-0.466128	0.108169
-0.410431	-0.82714		-0.410038	0.073196		-0.409955	0.011958		-0.409709	-0.043958		-0.409948	-0.04636		-0.410216	1.66795		-0.465523	0.108848
-0.409765	-0.827296		-0.409372	0.073604		-0.409289	0.012204		-0.409043	-0.043904		-0.409283	-0.045227		-0.40955	1.669		-0.464917	0.109373
-0.409099	-0.828224		-0.408707	0.074311		-0.408623	0.012663		-0.408377	-0.044059		-0.408618	-0.04504		-0.408884	1.67029		-0.464312	0.109958
-0.408434	-0.829096		-0.408041	0.074052		-0.407957	0.013279		-0.407711	-0.043858		-0.407953	-0.045402		-0.408218	1.67061		-0.463706	0.110227
-0.407768	-0.828921		-0.407376	0.073657		-0.407291	0.013635		-0.407045	-0.043637		-0.407287	-0.045216		-0.407552	1.67071		-0.463101	0.110147
-0.407103	-0.829046		-0.40671	0.07287		-0.406625	0.013018		-0.406379	-0.043098		-0.406622	-0.045331		-0.406886	1.67185		-0.462495	0.110697
-0.406437	-0.829628		-0.406044	0.071992		-0.405959	0.011724		-0.405713	-0.043464		-0.405957	-0.045715		-0.40622	1.67134		-0.46189	0.111927
-0.405772	-0.82976		-0.405379	0.071871		-0.405293	0.01119		-0.405047	-0.043957		-0.405292	-0.045213		-0.405554	1.67226		-0.461284	0.113175
-0.405106	-0.830495		-0.404713	0.072369		-0.404627	0.010951		-0.404381	-0.043905		-0.404627	-0.045641		-0.404888	1.67314		-0.460679	0.114033
-0.404441	-0.830533		-0.404048	0.072551		-0.403961	0.010152		-0.403715	-0.043928		-0.403961	-0.045398		-0.404222	1.67247		-0.460073	0.114788
-0.403775	-0.830445		-0.403382	0.073004		-0.403295	0.009872		-0.403049	-0.04394		-0.403296	-0.045133		-0.403556	1.67292		-0.459468	0.114722
-0.40311	-0.831319		-0.402717	0.072685		-0.402629	0.010276		-0.402383	-0.043748		-0.402631	-0.045351		-0.40289	1.6735		-0.458862	0.115246
-0.402444	-0.831135		-0.402051	0.072319		-0.401963	0.009851		-0.401717	-0.04334		-0.401966	-0.045563		-0.402224	1.67408		-0.458257	0.116026
-0.401779	-0.831885		-0.401386	0.071678		-0.401297	0.008752		-0.401051	-0.043796		-0.401301	-0.046331		-0.401558	1.67447		-0.457651	0.118137
-0.401113	-0.831971		-0.40072	0.071396		-0.400631	0.008494		-0.400385	-0.043935		-0.400635	-0.046791		-0.400892	1.67448		-0.457046	0.118466
-0.400448	-0.83204		-0.400055	0.072101		-0.399965	0.00894		-0.399719	-0.04401		-0.39997	-0.047081		-0.400226	1.67464		-0.45644	0.119058
-0.399782	-0.832494		-0.399389	0.072623		-0.399299	0.008955		-0.399053	-0.043342		-0.399305	-0.045005		-0.39956	1.67455		-0.455835	0.119689
-0.399117	-0.832891		-0.398723	0.072373		-0.398633	0.009301		-0.398387	-0.043865		-0.39864	-0.045032		-0.398894	1.67448		-0.455229	0.120506
-0.398451	-0.832018		-0.398058	0.072415		-0.397967	0.009556		-0.397721	-0.044502		-0.397975	-0.045179		-0.398228	1.67501		-0.454624	0.121111
-0.397785	-0.831231		-0.397392	0.072239		-0.397301	0.009562		-0.397055	-0.045224		-0.39731	-0.044886		-0.397562	1.67599		-0.454018	0.120898
-0.39712	-0.830931		-0.396727	0.072298		-0.396635	0.009861		-0.396389	-0.044883		-0.396644	-0.045181		-0.396896	1.67684		-0.453413	0.120559
-0.396454	-0.830827		-0.396061	0.073156		-0.395969	0.009576		-0.395723	-0.044774		-0.395979	-0.045385		-0.39623	1.67835		-0.452807	0.121334
-0.395789	-0.831207		-0.395396	0.073766		-0.395303	0.009663		-0.395057	-0.045089		-0.395314	-0.045498		-0.395564	1.67829		-0.452202	0.122336
-0.395123	-0.830679		-0.39473	0.074075		-0.394637	0.008492		-0.394391	-0.044602		-0.394649	-0.044717		-0.394898	1.68009		-0.451596	0.122652
-0.394458	-0.829947		-0.394065	0.074241		-0.393971	0.007383		-0.393725	-0.043943		-0.393984	-0.044274		-0.394232	1.68004		-0.450991	0.12302
-0.393792	-0.830099		-0.393399	0.074092		-0.393305	0.007215		-0.393059	-0.044149		-0.393318	-0.044584		-0.393566	1.68121		-0.450385	0.123069
-0.393127	-0.829999		-0.392733	0.074234		-0.392639	0.007302		-0.392393	-0.043736		-0.392653	-0.044279		-0.3929	1.68151		-0.44978	0.122708
-0.392461	-0.830514		-0.392068	0.074424		-0.391973	0.007307		-0.391727	-0.043429		-0.391988	-0.043363		-0.392234	1.68177		-0.449174	0.123199
-0.391796	-0.831291		-0.391402	0.073972		-0.391307	0.007623		-0.391061	-0.044026		-0.391323	-0.043442		-0.391568	1.68193		-0.448569	0.124286
-0.39113	-0.831438		-0.390737	0.074076		-0.390641	0.007652		-0.390395	-0.044289		-0.390658	-0.043437		-0.390902	1.68117		-0.447963	0.125221
-0.390465	-0.832562		-0.390071	0.074208		-0.389975	0.007417		-0.389729	-0.044422		-0.389992	-0.043519		-0.390236	1.68079		-0.447358	0.126051
-0.389799	-0.833141		-0.389406	0.074128		-0.389309	0.007858		-0.389063	-0.044473		-0.389327	-0.04298		-0.38957	1.68155		-0.446752	0.127123
-0.389134	-0.832521		-0.38874	0.074005		-0.388643	0.008051		-0.388397	-0.044785		-0.388662	-0.043428		-0.388904	1.682		-0.446147	0.128166
-0.388468	-0.831925		-0.388075	0.074369		-0.387977	0.00774		-0.387731	-0.043455		-0.387997	-0.043577		-0.388238	1.68135		-0.445541	0.129398
-0.387802	-0.832066		-0.387409	0.07418		-0.387311	0.007677		-0.387065	-0.043127		-0.387332	-0.044738		-0.387572	1.68053		-0.444936	0.129752
-0.387137	-0.832086		-0.386744	0.073349		-0.386645	0.008239		-0.386399	-0.042037		-0.386667	-0.045242		-0.386906	1.68047		-0.44433	0.129909
-0.386471	-0.831283		-0.386078	0.073516		-0.385979	0.009202		-0.385733	-0.040954		-0.386001	-0.044683		-0.38624	1.68117		-0.443725	0.130047
-0.385806	-0.831046		-0.385412	0.073556		-0.385313	0.009536		-0.385067	-0.039966		-0.385336	-0.044754		-0.385574	1.68176		-0.443119	0.13061
-0.38514	-0.831056		-0.384747	0.072945		-0.384647	0.009936		-0.384401	-0.039252		-0.384671	-0.04485		-0.384908	1.68178		-0.442514	0.131213
-0.384475	-0.830883		-0.384081	0.072985		-0.383981	0.010621		-0.383735	-0.039185		-0.384006	-0.045166		-0.384242	1.68197		-0.441908	0.131878
-0.383809	-0.830744		-0.383416	0.073935		-0.383315	0.010625		-0.383069	-0.039458		-0.383341	-0.045715		-0.383576	1.68286		-0.441303	0.132793
-0.383144	-0.830693		-0.38275	0.073966		-0.382649	0.010049		-0.382403	-0.039086		-0.382675	-0.045784		-0.38291	1.68287		-0.440697	0.133203
-0.382478	-0.831362		-0.382085	0.073678		-0.381983	0.00993		-0.381737	-0.039609		-0.38201	-0.046122		-0.382244	1.68347		-0.440092	0.132841
-0.381813	-0.831197		-0.381419	0.07409		-0.381317	0.010043		-0.381072	-0.040502		-0.381345	-0.047029		-0.381578	1.68341		-0.439486	0.132898
-0.381147	-0.831304		-0.380754	0.07397		-0.380651	0.010207		-0.380406	-0.041912		-0.38068	-0.047753		-0.380912	1.68338		-0.438881	0.133578
-0.380482	-0.83118		-0.380088	0.073586		-0.379985	0.010436		-0.37974	-0.041973		-0.380015	-0.047645		-0.380246	1.68272		-0.438275	0.135419
-0.379816	-0.831596		-0.379422	0.073491		-0.379319	0.010421		-0.379074	-0.042723		-0.379349	-0.04752		-0.37958	1.68285		-0.43767	0.135365
-0.379151	-0.831792		-0.378757	0.074026		-0.378653	0.010841		-0.378408	-0.042061		-0.378684	-0.047663		-0.378914	1.68341		-0.437064	0.135646
-0.378485	-0.832587		-0.378091	0.074656		-0.377987	0.011705		-0.377742	-0.042859		-0.378019	-0.047366		-0.378248	1.68405		-0.436459	0.136268
-0.37782	-0.83305		-0.377426	0.074627		-0.377321	0.012167		-0.377076	-0.042032		-0.377354	-0.046952		-0.377582	1.68515		-0.435853	0.137293
-0.377154	-0.833394		-0.37676	0.074317		-0.376655	0.012387		-0.37641	-0.041162		-0.376689	-0.046188		-0.376916	1.68461		-0.435248	0.137866
-0.376488	-0.83413		-0.376095	0.073745		-0.375989	0.01196		-0.375744	-0.040586		-0.376024	-0.046276		-0.37625	1.6852		-0.434642	0.138524
-0.375823	-0.833776		-0.375429	0.073025		-0.375323	0.01083		-0.375078	-0.040329		-0.375358	-0.047274		-0.375584	1.68592		-0.434037	0.139162
-0.375157	-0.832122		-0.374764	0.073281		-0.374657	0.010006		-0.374412	-0.041094		-0.374693	-0.04742		-0.374918	1.68741		-0.433431	0.139656
-0.374492	-0.831733		-0.374098	0.073753		-0.373991	0.009433		-0.373746	-0.040937		-0.374028	-0.047078		-0.374252	1.68741		-0.432826	0.1402
-0.373826	-0.831926		-0.373433	0.074648		-0.373325	0.008998		-0.37308	-0.04167		-0.373363	-0.04727		-0.373586	1.68698		-0.43222	0.140144
-0.373161	-0.831948		-0.372767	0.075131		-0.372659	0.008935		-0.372414	-0.041909		-0.372698	-0.047358		-0.37292	1.68707		-0.431615	0.141233
-0.372495	-0.832954		-0.372101	0.075101		-0.371993	0.008952		-0.371748	-0.041398		-0.372032	-0.04769		-0.372254	1.68749		-0.431009	0.141511
-0.37183	-0.832999		-0.371436	0.074994		-0.371327	0.008618		-0.371082	-0.041028		-0.371367	-0.048165		-0.371588	1.68818		-0.430404	0.141975
-0.371164	-0.83392		-0.37077	0.074658		-0.370661	0.008503		-0.370416	-0.041007		-0.370702	-0.04873		-0.370922	1.68857		-0.429798	0.142847
-0.370499	-0.83498		-0.370105	0.073746		-0.369995	0.008593		-0.36975	-0.04145		-0.370037	-0.049336		-0.370256	1.68826		-0.429193	0.143367
-0.369833	-0.835138		-0.369439	0.073057		-0.369329	0.008275		-0.369084	-0.041025		-0.369372	-0.049388		-0.36959	1.6886		-0.428587	0.143602
-0.369168	-0.836103		-0.368774	0.073212		-0.368663	0.007426		-0.368418	-0.041168		-0.368706	-0.049495		-0.368924	1.68907		-0.427981	0.143814
-0.368502	-0.836566		-0.368108	0.073749		-0.367997	0.007022		-0.367752	-0.040942		-0.368041	-0.04936		-0.368258	1.68921		-0.427376	0.144066
-0.367837	-0.837176		-0.367443	0.074214		-0.367331	0.006964		-0.367086	-0.039984		-0.367376	-0.049204		-0.367592	1.68969		-0.426771	0.144692
-0.367171	-0.837934		-0.366777	0.073901		-0.366665	0.006542		-0.36642	-0.040384		-0.366711	-0.049222		-0.366926	1.68939		-0.426165	0.145728
-0.366506	-0.837621		-0.366111	0.073142		-0.365999	0.005754		-0.365754	-0.041106		-0.366046	-0.050252		-0.36626	1.69003		-0.42556	0.146457
-0.36584	-0.838102		-0.365446	0.073085		-0.365333	0.005206		-0.365088	-0.041389		-0.365381	-0.051411		-0.365594	1.69062		-0.424954	0.146812
-0.365174	-0.839157		-0.36478	0.073303		-0.364667	0.005076		-0.364422	-0.041265		-0.364715	-0.051607		-0.364928	1.69029		-0.424349	0.145785
-0.364509	-0.840334		-0.364115	0.07348		-0.364001	0.005102		-0.363756	-0.041445		-0.36405	-0.052057		-0.364262	1.69057		-0.423743	0.147417
-0.363843	-0.841132		-0.363449	0.073494		-0.363335	0.005752		-0.36309	-0.042039		-0.363385	-0.052651		-0.363596	1.69024		-0.423137	0.147805
-0.363178	-0.84247		-0.362784	0.0728		-0.362669	0.006088		-0.362424	-0.042148		-0.36272	-0.053223		-0.36293	1.6896		-0.422532	0.14771
-0.362512	-0.842536		-0.362118	0.07214		-0.362004	0.005349		-0.361758	-0.042102		-0.362055	-0.053644		-0.362264	1.6905		-0.421926	0.148621
-0.361847	-0.842897		-0.361453	0.071565		-0.361337	0.005665		-0.361092	-0.04245		-0.361389	-0.05409		-0.361598	1.69083		-0.421321	0.149542
-0.361181	-0.844273		-0.360787	0.071906		-0.360672	0.006225		-0.360426	-0.042804		-0.360724	-0.054142		-0.360932	1.6904		-0.420716	0.151127
-0.360516	-0.84509		-0.360122	0.072753		-0.360005	0.005506		-0.35976	-0.043373		-0.360059	-0.054258		-0.360266	1.69027		-0.42011	0.152477
-0.35985	-0.845815		-0.359456	0.073028		-0.35934	0.005428		-0.359094	-0.043688		-0.359394	-0.054607		-0.3596	1.69059		-0.419504	0.152566
-0.359185	-0.846702		-0.35879	0.073404		-0.358674	0.005158		-0.358428	-0.044055		-0.358729	-0.055314		-0.358934	1.69041		-0.418899	0.152601
-0.358519	-0.846049		-0.358125	0.07356		-0.358008	0.004678		-0.357762	-0.043621		-0.358063	-0.055123		-0.358268	1.69051		-0.418293	0.152897
-0.357854	-0.84573		-0.357459	0.072999		-0.357342	0.004358		-0.357096	-0.042897		-0.357398	-0.055251		-0.357602	1.69137		-0.417688	0.153947
-0.357188	-0.84615		-0.356794	0.072814		-0.356676	0.003921		-0.35643	-0.042106		-0.356733	-0.055519		-0.356936	1.69148		-0.417082	0.154254
-0.356523	-0.845585		-0.356128	0.073009		-0.35601	0.002872		-0.355764	-0.042335		-0.356068	-0.055941		-0.35627	1.69108		-0.416477	0.155097
-0.355857	-0.846127		-0.355463	0.073396		-0.355344	0.002528		-0.355098	-0.042347		-0.355403	-0.056206		-0.355604	1.6913		-0.415872	0.156005
-0.355191	-0.846652		-0.354797	0.073575		-0.354678	0.002523		-0.354432	-0.042625		-0.354737	-0.05622		-0.354938	1.69244		-0.415266	0.156319
-0.354526	-0.846864		-0.354132	0.073617		-0.354012	0.002553		-0.353766	-0.043243		-0.354072	-0.055601		-0.354272	1.69228		-0.41466	0.156457
-0.35386	-0.846654		-0.353466	0.073866		-0.353346	0.001868		-0.3531	-0.044146		-0.353407	-0.055258		-0.353606	1.69195		-0.414055	0.156833
-0.353195	-0.847362		-0.3528	0.073465		-0.35268	0.001422		-0.352434	-0.044537		-0.352742	-0.055745		-0.35294	1.69207		-0.413449	0.157121
-0.352529	-0.847905		-0.352135	0.073963		-0.352014	0.001682		-0.351768	-0.044539		-0.352077	-0.055937		-0.352274	1.69175		-0.412844	0.157326
-0.351864	-0.848124		-0.351469	0.074728		-0.351348	0.001715		-0.351102	-0.044532		-0.351412	-0.055849		-0.351608	1.69136		-0.412238	0.157823
-0.351198	-0.8491		-0.350804	0.074359		-0.350682	0.001078		-0.350436	-0.044633		-0.350746	-0.05552		-0.350942	1.69092		-0.411633	0.15843
-0.350533	-0.84904		-0.350138	0.074682		-0.350016	0.000999		-0.34977	-0.045149		-0.350081	-0.056243		-0.350276	1.69169		-0.411027	0.159624
-0.349867	-0.849237		-0.349473	0.075176		-0.34935	0.001274		-0.349104	-0.045361		-0.349416	-0.057206		-0.34961	1.6927		-0.410422	0.160677
-0.349202	-0.848544		-0.348807	0.074886		-0.348684	0.001506		-0.348439	-0.0452		-0.348751	-0.05794		-0.348944	1.69169		-0.409816	0.160396
-0.348536	-0.848391		-0.348142	0.074379		-0.348018	0.001705		-0.347773	-0.044554		-0.348086	-0.058321		-0.348278	1.69094		-0.409211	0.160299
-0.347871	-0.847761		-0.347476	0.074168		-0.347352	0.002288		-0.347107	-0.043897		-0.34742	-0.058133		-0.347612	1.69163		-0.408605	0.160442
-0.347205	-0.84806		-0.346811	0.074046		-0.346686	0.002605		-0.346441	-0.043803		-0.346755	-0.058435		-0.346946	1.69216		-0.408	0.160616
-0.34654	-0.848301		-0.346145	0.073715		-0.34602	0.002402		-0.345775	-0.043281		-0.34609	-0.058269		-0.34628	1.69313		-0.407394	0.161181
-0.345874	-0.847237		-0.345479	0.073499		-0.345354	0.001483		-0.345109	-0.043539		-0.345425	-0.05811		-0.345614	1.69327		-0.406789	0.16233
-0.345209	-0.847649		-0.344814	0.07312		-0.344688	0.001024		-0.344443	-0.042457		-0.34476	-0.058149		-0.344948	1.69314		-0.406183	0.162728
-0.344543	-0.846922		-0.344148	0.072771		-0.344022	0.000598		-0.343777	-0.042147		-0.344094	-0.057614		-0.344282	1.69237		-0.405578	0.163333
-0.343877	-0.84628		-0.343483	0.072993		-0.343356	-0.000171		-0.343111	-0.042939		-0.343429	-0.057539		-0.343616	1.69353		-0.404972	0.163186
-0.343212	-0.846123		-0.342817	0.073345		-0.34269	8.2e-05		-0.342445	-0.043012		-0.342764	-0.057461		-0.34295	1.69222		-0.404367	0.164568
-0.342546	-0.846533		-0.342152	0.074056		-0.342024	0.000815		-0.341779	-0.042528		-0.342099	-0.056992		-0.342284	1.69156		-0.403761	0.165797
-0.341881	-0.84563		-0.341486	0.074259		-0.341358	0.000878		-0.341113	-0.042221		-0.341434	-0.057671		-0.341618	1.69036		-0.403156	0.166728
-0.341215	-0.847002		-0.340821	0.074479		-0.340692	0.000912		-0.340447	-0.041758		-0.340769	-0.058761		-0.340952	1.68979		-0.40255	0.167237
-0.34055	-0.848341		-0.340155	0.073866		-0.340026	0.001212		-0.339781	-0.041789		-0.340103	-0.058783		-0.340286	1.68957		-0.401945	0.16759
-0.339884	-0.847654		-0.33949	0.07354		-0.33936	0.001485		-0.339115	-0.041475		-0.339438	-0.0584		-0.33962	1.69024		-0.401339	0.167935
-0.339219	-0.847466		-0.338824	0.072283		-0.338694	0.001789		-0.338449	-0.041696		-0.338773	-0.057899		-0.338954	1.68905		-0.400734	0.168215
-0.338553	-0.847652		-0.338158	0.071716		-0.338028	0.001867		-0.337783	-0.04234		-0.338108	-0.05766		-0.338288	1.6887		-0.400128	0.1687
-0.337888	-0.84767		-0.337493	0.072415		-0.337362	0.002133		-0.337117	-0.042939		-0.337443	-0.057476		-0.337622	1.68958		-0.399523	0.168544
-0.337222	-0.847766		-0.336827	0.073141		-0.336696	0.001991		-0.336451	-0.042732		-0.336777	-0.057793		-0.336956	1.69065		-0.398917	0.169598
-0.336557	-0.846868		-0.336162	0.073259		-0.33603	0.001928		-0.335785	-0.0429		-0.336112	-0.058061		-0.33629	1.69023		-0.398312	0.169801
-0.335891	-0.846723		-0.335496	0.073639		-0.335364	0.002145		-0.335119	-0.043204		-0.335447	-0.057688		-0.335624	1.68921		-0.397706	0.169615
-0.335226	-0.846622		-0.334831	0.073599		-0.334698	0.001759		-0.334453	-0.04374		-0.334782	-0.057745		-0.334958	1.68955		-0.397101	0.17012
-0.33456	-0.846543		-0.334165	0.073174		-0.334032	0.001517		-0.333787	-0.045267		-0.334117	-0.0578		-0.334292	1.68871		-0.396495	0.170342
-0.333894	-0.846046		-0.3335	0.073246		-0.333366	0.00166		-0.333121	-0.045755		-0.333451	-0.05791		-0.333626	1.68827		-0.39589	0.170786
-0.333229	-0.845819		-0.332834	0.073643		-0.3327	0.002477		-0.332455	-0.045985		-0.332786	-0.057224		-0.33296	1.68758		-0.395284	0.171823
-0.332563	-0.845325		-0.332168	0.074562		-0.332034	0.002803		-0.331789	-0.04591		-0.332121	-0.055898		-0.332294	1.68701		-0.394679	0.173539
-0.331898	-0.845531		-0.331503	0.074354		-0.331368	0.002737		-0.331123	-0.045643		-0.331456	-0.05618		-0.331628	1.68715		-0.394073	0.174925
-0.331232	-0.845473		-0.330837	0.073789		-0.330702	0.002732		-0.330457	-0.045378		-0.330791	-0.056814		-0.330962	1.68725		-0.393468	0.174474
-0.330567	-0.845569		-0.330172	0.073248		-0.330036	0.002383		-0.329791	-0.04557		-0.330126	-0.056542		-0.330296	1.68704		-0.392862	0.174235
-0.329901	-0.845443		-0.329506	0.073256		-0.32937	0.002183		-0.329125	-0.046539		-0.32946	-0.055955		-0.32963	1.68701		-0.392257	0.174385
-0.329236	-0.845511		-0.328841	0.07303		-0.328704	0.002132		-0.328459	-0.046943		-0.328795	-0.055765		-0.328964	1.68691		-0.391651	0.174576
-0.32857	-0.845669		-0.328175	0.073802		-0.328038	0.002226		-0.327793	-0.046532		-0.32813	-0.055897		-0.328298	1.68629		-0.391046	0.175493
-0.327905	-0.845838		-0.32751	0.074301		-0.327372	0.002087		-0.327127	-0.046682		-0.327465	-0.055778		-0.327632	1.68729		-0.39044	0.175915
-0.327239	-0.845258		-0.326844	0.074605		-0.326706	0.002218		-0.326461	-0.04616		-0.3268	-0.055391		-0.326966	1.68648		-0.389835	0.177127
-0.326574	-0.845638		-0.326178	0.074323		-0.32604	0.001641		-0.325795	-0.045818		-0.326134	-0.054822		-0.3263	1.68575		-0.389229	0.178612
-0.325908	-0.845403		-0.325513	0.072791		-0.325374	0.000891		-0.325129	-0.04565		-0.325469	-0.054786		-0.325634	1.68556		-0.388624	0.179559
-0.325243	-0.84564		-0.324847	0.07161		-0.324708	0.000751		-0.324463	-0.045662		-0.324804	-0.055107		-0.324968	1.68444		-0.388018	0.180426
-0.324577	-0.845948		-0.324182	0.071017		-0.324042	0.000362		-0.323797	-0.046385		-0.324139	-0.055466		-0.324302	1.68407		-0.387413	0.181066
-0.323911	-0.845572		-0.323516	0.070929		-0.323376	0.00039		-0.323131	-0.047084		-0.323474	-0.055619		-0.323636	1.68369		-0.386807	0.180876
-0.323246	-0.846193		-0.322851	0.070637		-0.32271	0.001082		-0.322465	-0.047098		-0.322808	-0.055473		-0.32297	1.68297		-0.386202	0.181964
-0.32258	-0.846903		-0.322185	0.07016		-0.322044	0.001542		-0.321799	-0.047705		-0.322143	-0.055197		-0.322304	1.68142		-0.385596	0.183183
-0.321915	-0.847135		-0.32152	0.069801		-0.321378	0.001406		-0.321133	-0.047561		-0.321478	-0.055484		-0.321638	1.68169		-0.384991	0.184612
-0.321249	-0.847369		-0.320854	0.069961		-0.320712	0.001295		-0.320467	-0.046621		-0.320813	-0.055925		-0.320972	1.68267		-0.384385	0.184769
-0.320584	-0.848396		-0.320189	0.069794		-0.320046	0.001188		-0.319801	-0.046681		-0.320148	-0.056229		-0.320306	1.68231		-0.38378	0.186187
-0.319918	-0.849227		-0.319523	0.069617		-0.31938	0.000788		-0.319135	-0.046947		-0.319482	-0.05676		-0.31964	1.68168		-0.383174	0.187287
-0.319253	-0.849447		-0.318857	0.069071		-0.318714	0.000234		-0.318469	-0.048552		-0.318817	-0.05715		-0.318974	1.68088		-0.382569	0.188003
-0.318587	-0.849117		-0.318192	0.068014		-0.318048	-0.000134		-0.317803	-0.048974		-0.318152	-0.057759		-0.318308	1.67984		-0.381963	0.188783
-0.317922	-0.848079		-0.317526	0.0676		-0.317382	-0.000619		-0.317137	-0.049265		-0.317487	-0.058506		-0.317642	1.68016		-0.381358	0.189885
-0.317256	-0.848667		-0.316861	0.066808		-0.316716	-0.001205		-0.316472	-0.048641		-0.316822	-0.058057		-0.316976	1.67893		-0.380752	0.191126
-0.316591	-0.849354		-0.316195	0.066157		-0.31605	-0.001234		-0.315806	-0.048391		-0.316157	-0.05715		-0.31631	1.67793		-0.380147	0.192459
-0.315925	-0.849409		-0.31553	0.066872		-0.315384	-0.001243		-0.31514	-0.048509		-0.315491	-0.057067		-0.315644	1.67808		-0.379541	0.194056
-0.31526	-0.849331		-0.314864	0.066621		-0.314718	-0.001505		-0.314474	-0.049454		-0.314826	-0.05713		-0.314978	1.67905		-0.378936	0.194632
-0.314594	-0.849291		-0.314199	0.067543		-0.314052	-0.001706		-0.313808	-0.049663		-0.314161	-0.057854		-0.314312	1.6779		-0.37833	0.195025
-0.313929	-0.84893		-0.313533	0.068341		-0.313386	-0.001531		-0.313142	-0.049714		-0.313496	-0.058531		-0.313646	1.67718		-0.377725	0.195777
-0.313263	-0.84908		-0.312868	0.068184		-0.31272	-0.001101		-0.312476	-0.049941		-0.312831	-0.059644		-0.31298	1.67611		-0.377119	0.195716
-0.312597	-0.850622		-0.312202	0.068116		-0.312054	-0.000386		-0.31181	-0.050053		-0.312165	-0.060372		-0.312314	1.6752		-0.376514	0.19697
-0.311932	-0.850998		-0.311536	0.06784		-0.311388	5.2e-05		-0.311144	-0.050549		-0.3115	-0.060607		-0.311648	1.67498		-0.375908	0.198487
-0.311266	-0.851207		-0.310871	0.068028		-0.310722	0.000301		-0.310478	-0.051294		-0.310835	-0.061744		-0.310982	1.67486		-0.375303	0.19972
-0.310601	-0.851054		-0.310205	0.068079		-0.310056	0.00126		-0.309812	-0.051689		-0.31017	-0.062262		-0.310316	1.67495		-0.374697	0.200718
-0.309935	-0.850671		-0.30954	0.06731		-0.30939	0.001805		-0.309146	-0.052032		-0.309505	-0.061923		-0.30965	1.67507		-0.374092	0.201402
-0.30927	-0.851205		-0.308874	0.066766		-0.308724	0.001499		-0.30848	-0.052654		-0.308839	-0.062485		-0.308984	1.67456		-0.373486	0.2018
-0.308604	-0.852931		-0.308209	0.066359		-0.308058	0.001458		-0.307814	-0.053039		-0.308174	-0.062783		-0.308318	1.67497		-0.372881	0.202481
-0.307939	-0.853773		-0.307543	0.065985		-0.307392	0.00123		-0.307148	-0.053874		-0.307509	-0.062538		-0.307652	1.67461		-0.372275	0.203772
-0.307273	-0.853268		-0.306878	0.066213		-0.306726	0.001279		-0.306482	-0.054198		-0.306844	-0.062482		-0.306986	1.67444		-0.37167	0.205097
-0.306608	-0.854052		-0.306212	0.06663		-0.30606	0.001355		-0.305816	-0.053888		-0.306179	-0.063139		-0.30632	1.67417		-0.371064	0.205382
-0.305942	-0.854168		-0.305546	0.067261		-0.305394	0.000898		-0.30515	-0.053538		-0.305514	-0.063919		-0.305654	1.67447		-0.370459	0.205789
-0.305277	-0.853137		-0.304881	0.067573		-0.304728	0.000349		-0.304484	-0.053205		-0.304848	-0.064378		-0.304988	1.67408		-0.369853	0.206458
-0.304611	-0.852444		-0.304215	0.067092		-0.304062	-0.000369		-0.303818	-0.052798		-0.304183	-0.064705		-0.304322	1.67248		-0.369248	0.207276
-0.303946	-0.851742		-0.30355	0.067791		-0.303396	-0.000669		-0.303152	-0.052327		-0.303518	-0.064542		-0.303656	1.67065		-0.368642	0.207675
-0.30328	-0.853309		-0.302884	0.068267		-0.30273	-0.001193		-0.302486	-0.052198		-0.302853	-0.064629		-0.30299	1.66956		-0.368037	0.208153
-0.302615	-0.853265		-0.302219	0.067924		-0.302064	-0.001265		-0.30182	-0.05194		-0.302188	-0.064969		-0.302324	1.66854		-0.367431	0.208855
-0.301949	-0.853167		-0.301553	0.067878		-0.301398	-0.001207		-0.301154	-0.051519		-0.301522	-0.064959		-0.301658	1.66748		-0.366826	0.20997
-0.301283	-0.852611		-0.300888	0.067839		-0.300732	-0.00143		-0.300488	-0.050622		-0.300857	-0.064877		-0.300992	1.6674		-0.36622	0.211589
-0.300618	-0.852832		-0.300222	0.067644		-0.300066	-0.001949		-0.299822	-0.050008		-0.300192	-0.064734		-0.300326	1.6677		-0.365615	0.212463
-0.299952	-0.853378		-0.299556	0.067768		-0.2994	-0.002631		-0.299156	-0.050329		-0.299527	-0.064858		-0.29966	1.66743		-0.365009	0.213216
-0.299287	-0.853584		-0.298891	0.067774		-0.298734	-0.003041		-0.29849	-0.050339		-0.298862	-0.065761		-0.298994	1.66699		-0.364404	0.213543
-0.298621	-0.852775		-0.298225	0.067685		-0.298068	-0.003445		-0.297824	-0.050056		-0.298196	-0.065935		-0.298328	1.66631		-0.363798	0.21474
-0.297956	-0.853079		-0.29756	0.067905		-0.297403	-0.002924		-0.297158	-0.049575		-0.297531	-0.065882		-0.297662	1.66495		-0.363193	0.215709
-0.29729	-0.852795		-0.296894	0.067336		-0.296736	-0.002949		-0.296492	-0.04935		-0.296866	-0.066054		-0.296996	1.66405		-0.362587	0.216
-0.296625	-0.852139		-0.296229	0.067427		-0.296071	-0.002778		-0.295826	-0.049041		-0.296201	-0.066067		-0.29633	1.66299		-0.361982	0.216254
-0.295959	-0.852382		-0.295563	0.067476		-0.295404	-0.002384		-0.29516	-0.048679		-0.295536	-0.066465		-0.295664	1.66193		-0.361376	0.215534
-0.295294	-0.85245		-0.294898	0.067229		-0.294739	-0.002246		-0.294494	-0.047949		-0.29487	-0.067321		-0.294998	1.66105		-0.360771	0.215889
-0.294628	-0.852099		-0.294232	0.066331		-0.294073	-0.002662		-0.293828	-0.047535		-0.294205	-0.06821		-0.294332	1.65982		-0.360165	0.217929
-0.293963	-0.852865		-0.293567	0.065541		-0.293407	-0.003483		-0.293162	-0.047746		-0.29354	-0.068576		-0.293666	1.65837		-0.35956	0.219654
-0.293297	-0.852353		-0.292901	0.064892		-0.292741	-0.003994		-0.292496	-0.047964		-0.292875	-0.068972		-0.293	1.65745		-0.358954	0.220934
-0.292632	-0.852694		-0.292235	0.06491		-0.292075	-0.003838		-0.29183	-0.047553		-0.29221	-0.069724		-0.292334	1.65702		-0.358349	0.222281
-0.291966	-0.851902		-0.29157	0.065407		-0.291409	-0.003402		-0.291164	-0.047229		-0.291545	-0.069976		-0.291668	1.65756		-0.357743	0.22259
-0.2913	-0.851968		-0.290904	0.066559		-0.290743	-0.002483		-0.290498	-0.046693		-0.290879	-0.069738		-0.291002	1.65649		-0.357138	0.223096
-0.290635	-0.851885		-0.290239	0.066454		-0.290077	-0.002506		-0.289832	-0.046106		-0.290214	-0.069681		-0.290336	1.65599		-0.356532	0.223401
-0.289969	-0.851373		-0.289573	0.066652		-0.289411	-0.002835		-0.289166	-0.045795		-0.289549	-0.070318		-0.28967	1.65534		-0.355927	0.223594
-0.289304	-0.850836		-0.288908	0.066507		-0.288745	-0.003156		-0.2885	-0.045558		-0.288884	-0.070739		-0.289004	1.65514		-0.355321	0.223773
-0.288638	-0.85129		-0.288242	0.066667		-0.288079	-0.003433		-0.287834	-0.045551		-0.288219	-0.07025		-0.288338	1.65407		-0.354716	0.224194
-0.287973	-0.851302		-0.287577	0.066283		-0.287413	-0.003402		-0.287168	-0.04534		-0.287553	-0.070077		-0.287672	1.6523		-0.35411	0.22521
-0.287307	-0.850254		-0.286911	0.066351		-0.286747	-0.003103		-0.286502	-0.045007		-0.286888	-0.070449		-0.287006	1.65176		-0.353505	0.226529
-0.286642	-0.849489		-0.286246	0.066745		-0.286081	-0.002657		-0.285836	-0.044419		-0.286223	-0.070464		-0.28634	1.65088		-0.352899	0.2273
-0.285976	-0.849954		-0.28558	0.066681		-0.285415	-0.002329		-0.28517	-0.042933		-0.285558	-0.070718		-0.285674	1.65002		-0.352294	0.227904
-0.285311	-0.850149		-0.284914	0.066945		-0.284749	-0.002534		-0.284505	-0.042164		-0.284893	-0.07094		-0.285008	1.64932		-0.351688	0.228217
-0.284645	-0.850654		-0.284249	0.067942		-0.284083	-0.003119		-0.283839	-0.042162		-0.284227	-0.070678		-0.284342	1.64848		-0.351083	0.228878
-0.28398	-0.85111		-0.283583	0.069004		-0.283417	-0.003019		-0.283173	-0.042153		-0.283562	-0.070717		-0.283676	1.64744		-0.350477	0.229552
-0.283314	-0.850733		-0.282918	0.068816		-0.282751	-0.004112		-0.282507	-0.042198		-0.282897	-0.0712		-0.28301	1.64709		-0.349872	0.230102
-0.282649	-0.850866		-0.282252	0.068174		-0.282085	-0.004771		-0.281841	-0.041681		-0.282232	-0.071334		-0.282344	1.64629		-0.349266	0.230526
-0.281983	-0.851809		-0.281587	0.067965		-0.281419	-0.004954		-0.281175	-0.041049		-0.281567	-0.071151		-0.281678	1.64476		-0.348661	0.231047
-0.281318	-0.852247		-0.280921	0.067436		-0.280753	-0.005868		-0.280509	-0.040294		-0.280901	-0.071392		-0.281012	1.64352		-0.348055	0.232071
-0.280652	-0.852559		-0.280256	0.066891		-0.280087	-0.006889		-0.279843	-0.040012		-0.280236	-0.070667		-0.280346	1.64369		-0.34745	0.233494
-0.279986	-0.853134		-0.27959	0.067048		-0.279421	-0.006774		-0.279177	-0.0403		-0.279571	-0.06965		-0.27968	1.6435		-0.346844	0.23419
-0.279321	-0.853151		-0.278924	0.06616		-0.278755	-0.007146		-0.278511	-0.040017		-0.278906	-0.068792		-0.279014	1.6426		-0.346239	0.234645
-0.278655	-0.852901		-0.278259	0.066646		-0.278089	-0.007685		-0.277845	-0.039919		-0.278241	-0.068025		-0.278348	1.64094		-0.345633	0.23536
-0.27799	-0.85359		-0.277593	0.06721		-0.277423	-0.008159		-0.277179	-0.039639		-0.277576	-0.068105		-0.277682	1.63993		-0.345028	0.236755
-0.277324	-0.854227		-0.276928	0.067459		-0.276757	-0.008627		-0.276513	-0.039084		-0.27691	-0.068513		-0.277016	1.63791		-0.344422	0.237866
-0.276659	-0.853803		-0.276262	0.067385		-0.276091	-0.009046		-0.275847	-0.039098		-0.276245	-0.068676		-0.27635	1.63703		-0.343817	0.239194
-0.275993	-0.852777		-0.275597	0.067157		-0.275425	-0.009478		-0.275181	-0.039235		-0.27558	-0.068319		-0.275684	1.63643		-0.343211	0.240402
-0.275328	-0.852091		-0.274931	0.06683		-0.274759	-0.009883		-0.274515	-0.039664		-0.274915	-0.067831		-0.275018	1.63498		-0.342606	0.241053
-0.274662	-0.851113		-0.274266	0.067037		-0.274093	-0.009893		-0.273849	-0.039937		-0.27425	-0.067647		-0.274352	1.63408		-0.342	0.241342
-0.273997	-0.850385		-0.2736	0.066606		-0.273427	-0.010397		-0.273183	-0.040688		-0.273584	-0.067365		-0.273686	1.63285		-0.341395	0.241688
-0.273331	-0.849935		-0.272934	0.065442		-0.272761	-0.010879		-0.272517	-0.041334		-0.272919	-0.067246		-0.27302	1.63092		-0.340789	0.24219
-0.272666	-0.849184		-0.272269	0.065856		-0.272095	-0.010318		-0.271851	-0.042329		-0.272254	-0.066888		-0.272354	1.62976		-0.340184	0.24311
-0.272	-0.849735		-0.271603	0.066187		-0.271429	-0.009558		-0.271185	-0.042765		-0.271589	-0.066492		-0.271688	1.62828		-0.339578	0.244453
-0.271335	-0.850858		-0.270938	0.066003		-0.270763	-0.008722		-0.270519	-0.042608		-0.270924	-0.065946		-0.271022	1.62742		-0.338973	0.244609
-0.270669	-0.851732		-0.270272	0.064814		-0.270097	-0.008684		-0.269853	-0.043279		-0.270258	-0.06629		-0.270356	1.62687		-0.338367	0.244848
-0.270003	-0.851519		-0.269607	0.064529		-0.269431	-0.009397		-0.269187	-0.042927		-0.269593	-0.066868		-0.26969	1.6254		-0.337762	0.245271
-0.269338	-0.851519		-0.268941	0.063889		-0.268765	-0.009729		-0.268521	-0.043918		-0.268928	-0.067104		-0.269024	1.62522		-0.337156	0.245883
-0.268672	-0.851207		-0.268276	0.063057		-0.268099	-0.0098		-0.267855	-0.045275		-0.268263	-0.067599		-0.268358	1.62413		-0.336551	0.246284
-0.268007	-0.851694		-0.26761	0.063285		-0.267433	-0.010039		-0.267189	-0.04633		-0.267598	-0.067894		-0.267692	1.62261		-0.335945	0.2468
-0.267341	-0.852613		-0.266945	0.064005		-0.266767	-0.00971		-0.266523	-0.046326		-0.266933	-0.067554		-0.267026	1.62168		-0.33534	0.248001
-0.266676	-0.853013		-0.266279	0.064013		-0.266101	-0.009415		-0.265857	-0.046042		-0.266267	-0.06772		-0.26636	1.62079		-0.334734	0.249415
-0.26601	-0.852929		-0.265613	0.063713		-0.265435	-0.009376		-0.265191	-0.045955		-0.265602	-0.06755		-0.265694	1.61869		-0.334129	0.250204
-0.265345	-0.852978		-0.264948	0.064429		-0.264769	-0.009682		-0.264525	-0.046641		-0.264937	-0.067319		-0.265028	1.61675		-0.333523	0.25076
-0.264679	-0.85306		-0.264282	0.063942		-0.264103	-0.010149		-0.263859	-0.047006		-0.264272	-0.067056		-0.264362	1.61541		-0.332918	0.250515
-0.264014	-0.853548		-0.263617	0.064071		-0.263437	-0.010568		-0.263193	-0.046662		-0.263607	-0.066998		-0.263696	1.61472		-0.332312	0.251213
-0.263348	-0.853208		-0.262951	0.063304		-0.262771	-0.011108		-0.262527	-0.04639		-0.262941	-0.067295		-0.26303	1.61354		-0.331707	0.252401
-0.262683	-0.852619		-0.262286	0.063198		-0.262105	-0.011512		-0.261861	-0.045886		-0.262276	-0.066939		-0.262364	1.6124		-0.331101	0.253546
-0.262017	-0.852721		-0.26162	0.062286		-0.261439	-0.011825		-0.261195	-0.046816		-0.261611	-0.066249		-0.261698	1.6107		-0.330496	0.254277
-0.261352	-0.852839		-0.260955	0.062276		-0.260773	-0.011921		-0.260529	-0.047578		-0.260946	-0.065979		-0.261032	1.61013		-0.32989	0.255149
-0.260686	-0.853292		-0.260289	0.061829		-0.260107	-0.011216		-0.259863	-0.047977		-0.260281	-0.065202		-0.260366	1.60986		-0.329285	0.25615
-0.26002	-0.85328		-0.259624	0.061999		-0.259441	-0.010903		-0.259197	-0.047917		-0.259615	-0.064964		-0.2597	1.60855		-0.328679	0.256688
-0.259355	-0.853335		-0.258958	0.062641		-0.258775	-0.010717		-0.258531	-0.048324		-0.25895	-0.064472		-0.259034	1.60668		-0.328074	0.257425
-0.258689	-0.854012		-0.258292	0.061831		-0.258109	-0.010724		-0.257865	-0.048978		-0.258285	-0.064925		-0.258368	1.60488		-0.327468	0.258801
-0.258024	-0.854643		-0.257627	0.061236		-0.257443	-0.011175		-0.257199	-0.049231		-0.25762	-0.065548		-0.257702	1.60436		-0.326863	0.259234
-0.257358	-0.854416		-0.256961	0.061715		-0.256777	-0.011365		-0.256533	-0.049654		-0.256955	-0.065599		-0.257036	1.6027		-0.326257	0.259001
-0.256693	-0.853953		-0.256296	0.061274		-0.256111	-0.011271		-0.255867	-0.049788		-0.25629	-0.06529		-0.25637	1.60108		-0.325652	0.259301
-0.256027	-0.853061		-0.25563	0.061245		-0.255445	-0.011656		-0.255201	-0.049149		-0.255624	-0.065637		-0.255704	1.59959		-0.325046	0.259821
-0.255362	-0.852344		-0.254965	0.060911		-0.254779	-0.011937		-0.254535	-0.048672		-0.254959	-0.065428		-0.255038	1.59795		-0.324441	0.260112
-0.254696	-0.852225		-0.254299	0.060843		-0.254113	-0.012361		-0.253869	-0.049124		-0.254294	-0.065473		-0.254372	1.59651		-0.323835	0.260743
-0.254031	-0.852549		-0.253634	0.061239		-0.253447	-0.013075		-0.253204	-0.049665		-0.253629	-0.064678		-0.253706	1.59566		-0.32323	0.26177
-0.253365	-0.852398		-0.252968	0.061608		-0.252781	-0.013385		-0.252537	-0.049926		-0.252964	-0.063665		-0.25304	1.59424		-0.322624	0.262839
-0.2527	-0.851605		-0.252302	0.06256		-0.252115	-0.013172		-0.251872	-0.050441		-0.252298	-0.063514		-0.252374	1.59397		-0.322019	0.26365
-0.252034	-0.851675		-0.251637	0.062766		-0.251449	-0.01313		-0.251206	-0.050702		-0.251633	-0.063612		-0.251708	1.59398		-0.321413	0.264587
-0.251369	-0.851746		-0.250971	0.062014		-0.250783	-0.013345		-0.25054	-0.050664		-0.250968	-0.063941		-0.251042	1.59234		-0.320808	0.265795
-0.250703	-0.850998		-0.250306	0.062409		-0.250117	-0.012992		-0.249874	-0.051006		-0.250303	-0.064125		-0.250376	1.59125		-0.320202	0.266942
-0.250038	-0.850959		-0.24964	0.062571		-0.249451	-0.011941		-0.249208	-0.051363		-0.249638	-0.064373		-0.24971	1.59019		-0.319597	0.268463
-0.249372	-0.850643		-0.248975	0.062363		-0.248785	-0.011034		-0.248542	-0.051581		-0.248972	-0.064044		-0.249044	1.5892		-0.318991	0.268866
-0.248706	-0.850341		-0.248309	0.061814		-0.248119	-0.010581		-0.247876	-0.05226		-0.248307	-0.064578		-0.248378	1.58835		-0.318386	0.269878
-0.248041	-0.850303		-0.247644	0.061113		-0.247453	-0.010073		-0.24721	-0.052642		-0.247642	-0.06435		-0.247712	1.58724		-0.31778	0.270772
-0.247375	-0.849792		-0.246978	0.061057		-0.246787	-0.009974		-0.246544	-0.052825		-0.246977	-0.063953		-0.247046	1.58545		-0.317175	0.271241
-0.24671	-0.849024		-0.246313	0.061376		-0.246121	-0.010354		-0.245878	-0.053072		-0.246312	-0.063894		-0.24638	1.58342		-0.316569	0.272216
-0.246044	-0.848436		-0.245647	0.062202		-0.245455	-0.010627		-0.245212	-0.053693		-0.245647	-0.064069		-0.245714	1.58229		-0.315964	0.273105
-0.245379	-0.848071		-0.244981	0.061758		-0.244789	-0.01112		-0.244546	-0.054253		-0.244981	-0.065198		-0.245048	1.5809		-0.315358	0.273328
-0.244713	-0.848012		-0.244316	0.061411		-0.244123	-0.011515		-0.24388	-0.054798		-0.244316	-0.064986		-0.244382	1.5788		-0.314753	0.273187
-0.244048	-0.848262		-0.24365	0.061338		-0.243457	-0.012058		-0.243214	-0.055173		-0.243651	-0.065142		-0.243716	1.57701		-0.314147	0.273417
-0.243382	-0.849132		-0.242985	0.06113		-0.242791	-0.012037		-0.242548	-0.054954		-0.242986	-0.065337		-0.24305	1.5749		-0.313542	0.27428
-0.242717	-0.849602		-0.242319	0.061281		-0.242125	-0.011016		-0.241882	-0.05453		-0.242321	-0.065689		-0.242384	1.57347		-0.312936	0.275279
-0.242051	-0.850028		-0.241654	0.060832		-0.241459	-0.010773		-0.241216	-0.053531		-0.241655	-0.06685		-0.241718	1.57197		-0.312331	0.275882
-0.241386	-0.850753		-0.240988	0.060023		-0.240793	-0.01099		-0.24055	-0.052592		-0.24099	-0.06749		-0.241052	1.57092		-0.311725	0.275828
-0.24072	-0.85147		-0.240323	0.060063		-0.240127	-0.010252		-0.239884	-0.051795		-0.240325	-0.068041		-0.240386	1.57005		-0.31112	0.276295
-0.240055	-0.851807		-0.239657	0.060114		-0.239461	-0.009593		-0.239218	-0.051413		-0.23966	-0.067956		-0.23972	1.56952		-0.310514	0.276385
-0.239389	-0.852057		-0.238991	0.060021		-0.238795	-0.009828		-0.238552	-0.050704		-0.238995	-0.06759		-0.239054	1.56752		-0.309909	0.276498
-0.238724	-0.850968		-0.238326	0.059403		-0.238129	-0.01004		-0.237886	-0.049942		-0.238329	-0.067971		-0.238388	1.56641		-0.309303	0.277354
-0.238058	-0.850439		-0.23766	0.059927		-0.237463	-0.009581		-0.23722	-0.050061		-0.237664	-0.068108		-0.237722	1.56576		-0.308698	0.278352
-0.237392	-0.850006		-0.236995	0.060453		-0.236797	-0.008807		-0.236554	-0.04967		-0.236999	-0.067926		-0.237056	1.56343		-0.308092	0.279173
-0.236727	-0.849566		-0.236329	0.060158		-0.236131	-0.008343		-0.235888	-0.049825		-0.236334	-0.067234		-0.23639	1.56246		-0.307487	0.280185
-0.236061	-0.849141		-0.235664	0.061217		-0.235465	-0.007893		-0.235222	-0.049745		-0.235669	-0.066272		-0.235724	1.56079		-0.306881	0.281453
-0.235396	-0.850297		-0.234998	0.062229		-0.234799	-0.007026		-0.234556	-0.048797		-0.235003	-0.065729		-0.235058	1.55897		-0.306276	0.282759
-0.23473	-0.850262		-0.234333	0.06233		-0.234133	-0.006215		-0.23389	-0.048217		-0.234338	-0.065843		-0.234392	1.55741		-0.30567	0.284708
-0.234065	-0.849404		-0.233667	0.06133		-0.233467	-0.006269		-0.233224	-0.048697		-0.233673	-0.066204		-0.233726	1.55563		-0.305065	0.28526
-0.233399	-0.848408		-0.233002	0.061603		-0.232801	-0.006557		-0.232558	-0.049271		-0.233008	-0.066593		-0.23306	1.55378		-0.304459	0.286424
-0.232734	-0.848417		-0.232336	0.061238		-0.232135	-0.005456		-0.231892	-0.049415		-0.232343	-0.066922		-0.232394	1.55308		-0.303854	0.287083
-0.232068	-0.848871		-0.23167	0.060346		-0.23147	-0.00489		-0.231226	-0.049412		-0.231678	-0.0677		-0.231728	1.55264		-0.303248	0.287971
-0.231403	-0.849051		-0.231005	0.060548		-0.230803	-0.004783		-0.23056	-0.049617		-0.231012	-0.06787		-0.231062	1.55148		-0.302643	0.288564
-0.230737	-0.848698		-0.230339	0.060984		-0.230138	-0.004675		-0.229894	-0.050052		-0.230347	-0.067698		-0.230396	1.54874		-0.302037	0.288918
-0.230072	-0.848885		-0.229674	0.061288		-0.229472	-0.004246		-0.229228	-0.050074		-0.229682	-0.06799		-0.22973	1.54661		-0.301432	0.289934
-0.229406	-0.849403		-0.229008	0.061916		-0.228806	-0.004779		-0.228562	-0.049538		-0.229017	-0.06814		-0.229064	1.54434		-0.300826	0.290531
-0.228741	-0.849071		-0.228343	0.062983		-0.22814	-0.004981		-0.227896	-0.049313		-0.228352	-0.067773		-0.228398	1.54267		-0.300221	0.292094
-0.228075	-0.848659		-0.227677	0.063167		-0.227474	-0.004115		-0.22723	-0.049047		-0.227686	-0.067421		-0.227732	1.54073		-0.299615	0.292931
-0.227409	-0.847592		-0.227012	0.064457		-0.226808	-0.004032		-0.226564	-0.048685		-0.227021	-0.067459		-0.227066	1.53871		-0.29901	0.293986
-0.226744	-0.847051		-0.226346	0.064388		-0.226142	-0.003631		-0.225898	-0.048678		-0.226356	-0.066953		-0.2264	1.53792		-0.298404	0.294758
-0.226078	-0.847334		-0.22568	0.063833		-0.225476	-0.003878		-0.225232	-0.047503		-0.225691	-0.066146		-0.225734	1.53708		-0.297799	0.295936
-0.225413	-0.847182		-0.225015	0.064411		-0.22481	-0.00352		-0.224566	-0.047058		-0.225026	-0.06524		-0.225068	1.53523		-0.297193	0.297041
-0.224747	-0.846903		-0.224349	0.064735		-0.224144	-0.003517		-0.2239	-0.047707		-0.22436	-0.064666		-0.224402	1.53234		-0.296588	0.297804
-0.224082	-0.846827		-0.223684	0.064248		-0.223478	-0.003898		-0.223234	-0.047887		-0.223695	-0.064712		-0.223736	1.52979		-0.295982	0.298769
-0.223416	-0.846794		-0.223018	0.064246		-0.222812	-0.004429		-0.222568	-0.048354		-0.22303	-0.0643		-0.22307	1.52811		-0.295377	0.300153
-0.222751	-0.847413		-0.222353	0.064427		-0.222146	-0.004507		-0.221902	-0.048734		-0.222365	-0.063544		-0.222404	1.52701		-0.294771	0.301207
-0.222085	-0.847991		-0.221687	0.065125		-0.22148	-0.004332		-0.221236	-0.048773		-0.2217	-0.063847		-0.221738	1.52547		-0.294165	0.301757
-0.22142	-0.84781		-0.221022	0.065133		-0.220814	-0.004093		-0.220571	-0.048314		-0.221035	-0.06343		-0.221072	1.52439		-0.29356	0.302539
-0.220754	-0.847866		-0.220356	0.064028		-0.220148	-0.003242		-0.219905	-0.048261		-0.220369	-0.06355		-0.220406	1.52229		-0.292955	0.304361
-0.220089	-0.84816		-0.219691	0.063234		-0.219482	-0.002672		-0.219239	-0.048308		-0.219704	-0.064294		-0.21974	1.52002		-0.292349	0.305262
-0.219423	-0.848588		-0.219025	0.062822		-0.218816	-0.003384		-0.218573	-0.047724		-0.219039	-0.06416		-0.219074	1.51697		-0.291744	0.306366
-0.218758	-0.848563		-0.218359	0.063073		-0.21815	-0.003799		-0.217907	-0.046602		-0.218374	-0.064024		-0.218408	1.51444		-0.291138	0.308075
-0.218092	-0.847574		-0.217694	0.063845		-0.217484	-0.003466		-0.217241	-0.045744		-0.217709	-0.06368		-0.217742	1.51424		-0.290533	0.309255
-0.217427	-0.846889		-0.217028	0.062931		-0.216818	-0.003398		-0.216575	-0.04534		-0.217043	-0.063934		-0.217076	1.51293		-0.289927	0.309627
-0.216761	-0.846777		-0.216363	0.063222		-0.216152	-0.004412		-0.215909	-0.045463		-0.216378	-0.061974		-0.21641	1.51151		-0.289321	0.310227
-0.216095	-0.846268		-0.215697	0.063107		-0.215486	-0.00642		-0.215243	-0.045583		-0.215713	-0.061809		-0.215744	1.50909		-0.288716	0.311492
-0.21543	-0.845677		-0.215032	0.064034		-0.21482	-0.007661		-0.214577	-0.045456		-0.215048	-0.06163		-0.215078	1.50661		-0.28811	0.312299
-0.214764	-0.845502		-0.214366	0.065331		-0.214154	-0.00776		-0.213911	-0.045654		-0.214383	-0.061132		-0.214412	1.50487		-0.287505	0.312034
-0.214099	-0.845874		-0.213701	0.065003		-0.213488	-0.007		-0.213245	-0.045413		-0.213717	-0.06032		-0.213746	1.50242		-0.2869	0.3121
-0.213433	-0.846344		-0.213035	0.06578		-0.212822	-0.007141		-0.212579	-0.044666		-0.213052	-0.060339		-0.21308	1.50027		-0.286294	0.31214
-0.212768	-0.847063		-0.21237	0.06504		-0.212156	-0.007869		-0.211913	-0.043592		-0.212387	-0.06076		-0.212414	1.4979		-0.285688	0.313049
-0.212102	-0.847799		-0.211704	0.065427		-0.21149	-0.007871		-0.211247	-0.042604		-0.211722	-0.060076		-0.211748	1.49644		-0.285083	0.314486
-0.211437	-0.847982		-0.211038	0.065232		-0.210824	-0.008185		-0.210581	-0.042043		-0.211057	-0.059952		-0.211082	1.49485		-0.284477	0.315834
-0.210771	-0.847625		-0.210373	0.064387		-0.210158	-0.008538		-0.209915	-0.042054		-0.210392	-0.059353		-0.210416	1.49323		-0.283872	0.317259
-0.210106	-0.847566		-0.209707	0.065022		-0.209492	-0.008228		-0.209249	-0.042346		-0.209726	-0.059233		-0.20975	1.49166		-0.283266	0.318336
-0.20944	-0.847904		-0.209042	0.064681		-0.208826	-0.008654		-0.208583	-0.042594		-0.209061	-0.058722		-0.209084	1.48981		-0.282661	0.31917
-0.208775	-0.847942		-0.208376	0.064868		-0.20816	-0.009343		-0.207917	-0.04296		-0.208396	-0.057107		-0.208418	1.4883		-0.282055	0.32037
-0.208109	-0.847847		-0.207711	0.065343		-0.207494	-0.009373		-0.207251	-0.042996		-0.207731	-0.055924		-0.207752	1.48677		-0.28145	0.321836
-0.207444	-0.847762		-0.207045	0.064674		-0.206828	-0.010222		-0.206585	-0.042601		-0.207066	-0.05577		-0.207086	1.4837		-0.280844	0.322792
-0.206778	-0.847367		-0.20638	0.064799		-0.206162	-0.011686		-0.205919	-0.042336		-0.2064	-0.055166		-0.20642	1.48053		-0.280239	0.323889
-0.206113	-0.847067		-0.205714	0.065857		-0.205496	-0.011892		-0.205253	-0.042402		-0.205735	-0.055528		-0.205754	1.47857		-0.279633	0.324604
-0.205447	-0.84785		-0.205048	0.065666		-0.20483	-0.01153		-0.204587	-0.042498		-0.20507	-0.055193		-0.205088	1.47577		-0.279028	0.324961
-0.204781	-0.848683		-0.204383	0.065135		-0.204164	-0.012339		-0.203921	-0.042307		-0.204405	-0.054499		-0.204422	1.47379		-0.278422	0.325808
-0.204116	-0.848577		-0.203717	0.064524		-0.203498	-0.013362		-0.203255	-0.042205		-0.20374	-0.053757		-0.203756	1.47331		-0.277817	0.326562
-0.20345	-0.848572		-0.203052	0.065402		-0.202832	-0.013284		-0.202589	-0.042003		-0.203074	-0.052636		-0.20309	1.47097		-0.277211	0.327794
-0.202785	-0.848521		-0.202386	0.065431		-0.202166	-0.012866		-0.201923	-0.041544		-0.202409	-0.052476		-0.202424	1.46941		-0.276606	0.329486
-0.202119	-0.848143		-0.201721	0.065385		-0.2015	-0.01393		-0.201257	-0.041302		-0.201744	-0.052779		-0.201758	1.46797		-0.276	0.331072
-0.201454	-0.848069		-0.201055	0.064707		-0.200834	-0.015367		-0.200591	-0.04096		-0.201079	-0.052433		-0.201092	1.46595		-0.275395	0.332371
-0.200788	-0.848981		-0.20039	0.06504		-0.200168	-0.016166		-0.199925	-0.040276		-0.200414	-0.051137		-0.200426	1.46373		-0.274789	0.333631
-0.200123	-0.850171		-0.199724	0.064552		-0.199502	-0.01614		-0.199259	-0.039662		-0.199748	-0.049615		-0.19976	1.46179		-0.274184	0.334783
-0.199457	-0.851042		-0.199059	0.064634		-0.198836	-0.016951		-0.198593	-0.039831		-0.199083	-0.048632		-0.199094	1.45954		-0.273578	0.335532
-0.198792	-0.851373		-0.198393	0.063941		-0.19817	-0.017388		-0.197927	-0.039304		-0.198418	-0.047509		-0.198428	1.45685		-0.272973	0.336153
-0.198126	-0.850783		-0.197727	0.063977		-0.197504	-0.018222		-0.197261	-0.038522		-0.197753	-0.047385		-0.197762	1.45419		-0.272367	0.336052
-0.197461	-0.850163		-0.197062	0.064467		-0.196838	-0.019078		-0.196595	-0.038809		-0.197088	-0.046915		-0.197096	1.45247		-0.271762	0.337385
-0.196795	-0.849837		-0.196396	0.064223		-0.196172	-0.019148		-0.195929	-0.039145		-0.196423	-0.045053		-0.19643	1.45119		-0.271156	0.338498
-0.19613	-0.849897		-0.195731	0.06272		-0.195506	-0.018383		-0.195263	-0.040029		-0.195757	-0.044346		-0.195764	1.45006		-0.270551	0.33922
-0.195464	-0.849578		-0.195065	0.062393		-0.19484	-0.018105		-0.194597	-0.04119		-0.195092	-0.043662		-0.195098	1.44854		-0.269945	0.33984
-0.194798	-0.849853		-0.1944	0.062305		-0.194174	-0.018491		-0.193931	-0.041159		-0.194427	-0.043105		-0.194432	1.44637		-0.26934	0.341156
-0.194133	-0.850994		-0.193734	0.061148		-0.193508	-0.019196		-0.193265	-0.04158		-0.193762	-0.042545		-0.193766	1.44461		-0.268734	0.342571
-0.193467	-0.851314		-0.193069	0.06205		-0.192842	-0.019299		-0.192599	-0.042044		-0.193097	-0.0425		-0.1931	1.44254		-0.268129	0.343667
-0.192802	-0.851383		-0.192403	0.062307		-0.192176	-0.019507		-0.191933	-0.042506		-0.192431	-0.042304		-0.192434	1.44		-0.267523	0.345
-0.192136	-0.851786		-0.191737	0.062335		-0.19151	-0.020884		-0.191267	-0.043315		-0.191766	-0.041026		-0.191768	1.43759		-0.266918	0.345252
-0.191471	-0.852092		-0.191072	0.062802		-0.190844	-0.021745		-0.190601	-0.043074		-0.191101	-0.040515		-0.191102	1.43627		-0.266312	0.346714
-0.190805	-0.852004		-0.190406	0.062858		-0.190178	-0.021418		-0.189935	-0.042567		-0.190436	-0.039348		-0.190436	1.43482		-0.265707	0.348291
-0.19014	-0.852603		-0.189741	0.0632		-0.189512	-0.02122		-0.189269	-0.041585		-0.189771	-0.0388		-0.18977	1.4326		-0.265101	0.349651
-0.189474	-0.852947		-0.189075	0.062134		-0.188846	-0.02147		-0.188604	-0.040769		-0.189105	-0.037496		-0.189104	1.43008		-0.264496	0.350826
-0.188809	-0.852667		-0.18841	0.060768		-0.18818	-0.021514		-0.187937	-0.040875		-0.18844	-0.036919		-0.188438	1.42748		-0.26389	0.351385
-0.188143	-0.851834		-0.187744	0.060452		-0.187514	-0.022239		-0.187272	-0.041474		-0.187775	-0.03645		-0.187772	1.425		-0.263285	0.352445
-0.187478	-0.851713		-0.187079	0.060368		-0.186848	-0.02339		-0.186606	-0.04151		-0.18711	-0.036176		-0.187106	1.42305		-0.262679	0.352953
-0.186812	-0.852003		-0.186413	0.061404		-0.186182	-0.023693		-0.18594	-0.041355		-0.186445	-0.035868		-0.18644	1.42162		-0.262074	0.353251
-0.186147	-0.852032		-0.185748	0.061093		-0.185516	-0.023686		-0.185274	-0.041885		-0.18578	-0.03513		-0.185774	1.41982		-0.261468	0.354126
-0.185481	-0.852394		-0.185082	0.060844		-0.18485	-0.023904		-0.184608	-0.042796		-0.185114	-0.033681		-0.185108	1.418		-0.260863	0.355031
-0.184815	-0.853421		-0.184416	0.060322		-0.184184	-0.023621		-0.183942	-0.043254		-0.184449	-0.032164		-0.184442	1.41516		-0.260257	0.355742
-0.18415	-0.853517		-0.183751	0.060366		-0.183518	-0.023602		-0.183276	-0.04305		-0.183784	-0.031757		-0.183776	1.41246		-0.259652	0.356768
-0.183484	-0.853231		-0.183085	0.060137		-0.182852	-0.022957		-0.18261	-0.042672		-0.183119	-0.032532		-0.18311	1.40935		-0.259046	0.357996
-0.182819	-0.853153		-0.18242	0.059521		-0.182186	-0.021678		-0.181944	-0.042444		-0.182454	-0.032835		-0.182444	1.4071		-0.258441	0.35823
-0.182153	-0.853845		-0.181754	0.059744		-0.18152	-0.02113		-0.181278	-0.041876		-0.181788	-0.032159		-0.181778	1.40547		-0.257835	0.358622
-0.181488	-0.853863		-0.181089	0.059814		-0.180854	-0.021479		-0.180612	-0.041803		-0.181123	-0.031081		-0.181112	1.40404		-0.25723	0.359875
-0.180822	-0.853034		-0.180423	0.060302		-0.180188	-0.022126		-0.179946	-0.042534		-0.180458	-0.030392		-0.180446	1.40193		-0.256624	0.360835
-0.180157	-0.852729		-0.179758	0.06013		-0.179522	-0.022631		-0.17928	-0.043201		-0.179793	-0.030085		-0.17978	1.40001		-0.256019	0.361799
-0.179491	-0.852669		-0.179092	0.059932		-0.178856	-0.02217		-0.178614	-0.043301		-0.179128	-0.028954		-0.179114	1.39762		-0.255413	0.363018
-0.178826	-0.852397		-0.178426	0.060424		-0.17819	-0.022055		-0.177948	-0.043805		-0.178462	-0.028294		-0.178448	1.39527		-0.254808	0.364573
-0.17816	-0.851899		-0.177761	0.05985		-0.177524	-0.021658		-0.177282	-0.043976		-0.177797	-0.027435		-0.177782	1.39379		-0.254202	0.366475
-0.177495	-0.851444		-0.177095	0.05954		-0.176858	-0.021262		-0.176616	-0.044231		-0.177132	-0.026912		-0.177116	1.39119		-0.253597	0.368231
-0.176829	-0.851324		-0.17643	0.059641		-0.176192	-0.022159		-0.17595	-0.044769		-0.176467	-0.025926		-0.17645	1.38855		-0.252991	0.36925
-0.176164	-0.850967		-0.175764	0.060138		-0.175526	-0.022573		-0.175284	-0.044703		-0.175802	-0.024938		-0.175784	1.38589		-0.252386	0.370267
-0.175498	-0.850987		-0.175099	0.059918		-0.17486	-0.02196		-0.174618	-0.044282		-0.175137	-0.024842		-0.175118	1.38309		-0.25178	0.370131
-0.174833	-0.85105		-0.174433	0.060044		-0.174194	-0.02108		-0.173952	-0.044265		-0.174471	-0.024801		-0.174452	1.38097		-0.251175	0.371329
-0.174167	-0.850523		-0.173768	0.060645		-0.173528	-0.020579		-0.173286	-0.045483		-0.173806	-0.023645		-0.173786	1.37881		-0.250569	0.37211
-0.173501	-0.850141		-0.173102	0.060944		-0.172862	-0.019596		-0.17262	-0.04601		-0.173141	-0.02343		-0.17312	1.37745		-0.249964	0.372971
-0.172836	-0.850531		-0.172437	0.060349		-0.172196	-0.019821		-0.171954	-0.046329		-0.172476	-0.022471		-0.172454	1.3756		-0.249358	0.374075
-0.17217	-0.850347		-0.171771	0.060721		-0.17153	-0.020644		-0.171288	-0.046712		-0.171811	-0.022087		-0.171788	1.37406		-0.248753	0.375322
-0.171505	-0.849778		-0.171105	0.060864		-0.170864	-0.020437		-0.170622	-0.046228		-0.171145	-0.021734		-0.171122	1.37184		-0.248147	0.376342
-0.170839	-0.849626		-0.17044	0.061636		-0.170198	-0.020402		-0.169956	-0.046748		-0.17048	-0.02133		-0.170456	1.36902		-0.247542	0.378153
-0.170174	-0.849433		-0.169774	0.06053		-0.169532	-0.019871		-0.16929	-0.047944		-0.169815	-0.022058		-0.16979	1.36704		-0.246936	0.378331
-0.169508	-0.849408		-0.169109	0.060283		-0.168866	-0.019642		-0.168624	-0.047912		-0.16915	-0.021559		-0.169124	1.36491		-0.246331	0.379531
-0.168843	-0.849119		-0.168443	0.059883		-0.1682	-0.019772		-0.167958	-0.047526		-0.168485	-0.020639		-0.168458	1.36307		-0.245725	0.380832
-0.168177	-0.848555		-0.167778	0.060094		-0.167534	-0.018845		-0.167292	-0.047718		-0.167819	-0.020014		-0.167792	1.3618		-0.24512	0.381809
-0.167512	-0.848276		-0.167112	0.060349		-0.166868	-0.01821		-0.166626	-0.047947		-0.167154	-0.020484		-0.167126	1.36008		-0.244514	0.38304
-0.166846	-0.847952		-0.166447	0.059782		-0.166202	-0.019309		-0.16596	-0.047564		-0.166489	-0.020904		-0.16646	1.35882		-0.243909	0.384562
-0.166181	-0.847059		-0.165781	0.060526		-0.165536	-0.019972		-0.165294	-0.047084		-0.165824	-0.021099		-0.165794	1.35631		-0.243303	0.385248
-0.165515	-0.846721		-0.165115	0.061187		-0.164871	-0.019745		-0.164628	-0.047664		-0.165159	-0.020448		-0.165128	1.35424		-0.242698	0.385021
-0.16485	-0.847455		-0.16445	0.060931		-0.164205	-0.018777		-0.163962	-0.048271		-0.164494	-0.019422		-0.164462	1.35235		-0.242092	0.385657
-0.164184	-0.848379		-0.163784	0.060629		-0.163539	-0.017455		-0.163296	-0.048039		-0.163828	-0.018774		-0.163796	1.35039		-0.241487	0.386434
-0.163518	-0.848873		-0.163119	0.060473		-0.162873	-0.01625		-0.16263	-0.048331		-0.163163	-0.019585		-0.16313	1.34837		-0.240881	0.387335
-0.162853	-0.849307		-0.162453	0.060959		-0.162207	-0.016339		-0.161964	-0.047843		-0.162498	-0.01943		-0.162464	1.34557		-0.240276	0.387451
-0.162187	-0.849982		-0.161788	0.060269		-0.161541	-0.016988		-0.161298	-0.047416		-0.161833	-0.019821		-0.161798	1.34303		-0.23967	0.388185
-0.161522	-0.850056		-0.161122	0.06022		-0.160875	-0.018143		-0.160632	-0.047818		-0.161168	-0.020199		-0.161132	1.3404		-0.239065	0.388861
-0.160856	-0.849304		-0.160457	0.06014		-0.160209	-0.018046		-0.159966	-0.04741		-0.160502	-0.019838		-0.160466	1.33777		-0.238459	0.389847
-0.160191	-0.849256		-0.159791	0.059349		-0.159543	-0.017416		-0.1593	-0.047403		-0.159837	-0.019781		-0.1598	1.33494		-0.237854	0.390795
-0.159525	-0.849116		-0.159126	0.05894		-0.158877	-0.016735		-0.158634	-0.047675		-0.159172	-0.019807		-0.159134	1.33191		-0.237248	0.391994
-0.15886	-0.848916		-0.15846	0.058655		-0.158211	-0.016387		-0.157968	-0.047493		-0.158507	-0.020035		-0.158468	1.32989		-0.236643	0.393498
-0.158194	-0.849229		-0.157794	0.057549		-0.157545	-0.015448		-0.157302	-0.04737		-0.157842	-0.021405		-0.157802	1.32673		-0.236037	0.394987
-0.157529	-0.84893		-0.157129	0.057583		-0.156879	-0.015514		-0.156636	-0.047389		-0.157176	-0.022158		-0.157136	1.32426		-0.235432	0.396388
-0.156863	-0.848949		-0.156463	0.057151		-0.156213	-0.015951		-0.155971	-0.047649		-0.156511	-0.022292		-0.15647	1.32196		-0.234826	0.397472
-0.156198	-0.848186		-0.155798	0.057457		-0.155547	-0.015779		-0.155305	-0.047994		-0.155846	-0.022888		-0.155804	1.31913		-0.234221	0.397937
-0.155532	-0.848173		-0.155132	0.05848		-0.154881	-0.015528		-0.154639	-0.04772		-0.155181	-0.023043		-0.155138	1.31725		-0.233615	0.39957
-0.154867	-0.848376		-0.154467	0.059236		-0.154215	-0.015276		-0.153973	-0.047608		-0.154516	-0.023305		-0.154472	1.31476		-0.23301	0.400094
-0.154201	-0.848333		-0.153801	0.059294		-0.153549	-0.014806		-0.153307	-0.04758		-0.15385	-0.022908		-0.153806	1.31159		-0.232404	0.400839
-0.153536	-0.847765		-0.153136	0.058505		-0.152883	-0.015095		-0.152641	-0.047468		-0.153185	-0.022036		-0.15314	1.30918		-0.231799	0.401254
-0.15287	-0.847857		-0.15247	0.058507		-0.152217	-0.01512		-0.151975	-0.047338		-0.15252	-0.022311		-0.152474	1.30682		-0.231193	0.401405
-0.152204	-0.847576		-0.151804	0.057628		-0.151551	-0.01462		-0.151309	-0.047607		-0.151855	-0.022747		-0.151808	1.30411		-0.230588	0.401949
-0.151539	-0.847355		-0.151139	0.057838		-0.150885	-0.014709		-0.150643	-0.049065		-0.15119	-0.023403		-0.151142	1.30118		-0.229982	0.402822
-0.150873	-0.847418		-0.150473	0.057271		-0.150219	-0.014995		-0.149977	-0.049715		-0.150524	-0.022919		-0.150476	1.29837		-0.229377	0.404323
-0.150208	-0.847734		-0.149808	0.057213		-0.149553	-0.015177		-0.149311	-0.050348		-0.149859	-0.022629		-0.14981	1.29629		-0.228771	0.406601
-0.149542	-0.848372		-0.149142	0.058168		-0.148887	-0.015599		-0.148645	-0.050149		-0.149194	-0.020869		-0.149144	1.29341		-0.228166	0.408022
-0.148877	-0.84856		-0.148477	0.05753		-0.148221	-0.016452		-0.147979	-0.050229		-0.148529	-0.020759		-0.148478	1.29086		-0.22756	0.408836
-0.148211	-0.848207		-0.147811	0.057109		-0.147555	-0.016346		-0.147313	-0.049849		-0.147864	-0.020703		-0.147812	1.28809		-0.226955	0.409666
-0.147546	-0.848815		-0.147146	0.056321		-0.146889	-0.016654		-0.146647	-0.049335		-0.147199	-0.021326		-0.147146	1.28603		-0.226349	0.410537
-0.14688	-0.848887		-0.14648	0.056232		-0.146223	-0.016359		-0.145981	-0.049162		-0.146533	-0.02182		-0.14648	1.2838		-0.225744	0.411686
-0.146215	-0.847922		-0.145815	0.057091		-0.145557	-0.016227		-0.145315	-0.049759		-0.145868	-0.02225		-0.145814	1.28132		-0.225138	0.413279
-0.145549	-0.847006		-0.145149	0.056208		-0.144891	-0.016754		-0.144649	-0.049748		-0.145203	-0.021678		-0.145148	1.27852		-0.224533	0.414509
-0.144884	-0.846514		-0.144483	0.057119		-0.144225	-0.01652		-0.143983	-0.049333		-0.144538	-0.022037		-0.144482	1.27545		-0.223927	0.41521
-0.144218	-0.846687		-0.143818	0.056861		-0.143559	-0.016676		-0.143317	-0.04955		-0.143873	-0.021943		-0.143816	1.27333		-0.223322	0.416148
-0.143553	-0.846704		-0.143152	0.056526		-0.142893	-0.016904		-0.142651	-0.04899		-0.143207	-0.022753		-0.14315	1.27134		-0.222716	0.416979
-0.142887	-0.846349		-0.142487	0.056153		-0.142227	-0.017354		-0.141985	-0.049032		-0.142542	-0.02339		-0.142484	1.26825		-0.222111	0.417247
-0.142222	-0.845589		-0.141821	0.05643		-0.141561	-0.017591		-0.141319	-0.050213		-0.141877	-0.022516		-0.141818	1.26442		-0.221505	0.417861
-0.141556	-0.844765		-0.141156	0.056925		-0.140895	-0.018055		-0.140653	-0.051174		-0.141212	-0.021239		-0.141152	1.26067		-0.2209	0.418422
-0.14089	-0.844767		-0.14049	0.056563		-0.140229	-0.018504		-0.139987	-0.050054		-0.140547	-0.020616		-0.140486	1.25843		-0.220294	0.419486
-0.140225	-0.844879		-0.139825	0.056472		-0.139563	-0.018776		-0.139321	-0.049786		-0.139881	-0.020564		-0.13982	1.25631		-0.219689	0.420182
-0.139559	-0.844947		-0.139159	0.055561		-0.138897	-0.018276		-0.138655	-0.049921		-0.139216	-0.020366		-0.139154	1.25406		-0.219083	0.421147
-0.138894	-0.845645		-0.138493	0.055158		-0.138231	-0.018682		-0.137989	-0.049193		-0.138551	-0.020801		-0.138488	1.25152		-0.218478	0.422466
-0.138228	-0.846451		-0.137828	0.055048		-0.137565	-0.019476		-0.137323	-0.049513		-0.137886	-0.020186		-0.137822	1.24832		-0.217872	0.423423
-0.137563	-0.84697		-0.137162	0.054324		-0.136899	-0.018709		-0.136657	-0.049499		-0.137221	-0.020055		-0.137156	1.2456		-0.217267	0.424344
-0.136897	-0.847616		-0.136497	0.055151		-0.136233	-0.018879		-0.135991	-0.048486		-0.136556	-0.019569		-0.13649	1.24257		-0.216661	0.425268
-0.136232	-0.848112		-0.135831	0.054446		-0.135567	-0.019443		-0.135325	-0.048531		-0.13589	-0.020269		-0.135824	1.23927		-0.216056	0.426102
-0.135566	-0.848432		-0.135166	0.054739		-0.134901	-0.019201		-0.134659	-0.049457		-0.135225	-0.021466		-0.135158	1.23624		-0.21545	0.427049
-0.134901	-0.84867		-0.1345	0.055046		-0.134235	-0.018963		-0.133993	-0.049967		-0.13456	-0.021809		-0.134492	1.23362		-0.214845	0.428108
-0.134235	-0.848446		-0.133835	0.053987		-0.133569	-0.018504		-0.133327	-0.050399		-0.133895	-0.020754		-0.133826	1.23073		-0.214239	0.428742
-0.13357	-0.848571		-0.133169	0.054318		-0.132903	-0.018395		-0.132661	-0.050592		-0.13323	-0.020741		-0.13316	1.22681		-0.213634	0.429687
-0.132904	-0.849372		-0.132504	0.053502		-0.132237	-0.018755		-0.131995	-0.051033		-0.132564	-0.019762		-0.132494	1.22363		-0.213028	0.430531
-0.132239	-0.849212		-0.131838	0.05291		-0.131571	-0.019277		-0.131329	-0.051893		-0.131899	-0.020469		-0.131828	1.22059		-0.212423	0.431838
-0.131573	-0.848699		-0.131172	0.052917		-0.130905	-0.020039		-0.130663	-0.051998		-0.131234	-0.021054		-0.131162	1.21765		-0.211817	0.432524
-0.130907	-0.848635		-0.130507	0.052772		-0.130239	-0.021412		-0.129997	-0.051721		-0.130569	-0.020547		-0.130496	1.21485		-0.211212	0.433651
-0.130242	-0.848665		-0.129841	0.052929		-0.129573	-0.023011		-0.129331	-0.051186		-0.129904	-0.01988		-0.12983	1.21164		-0.210606	0.434469
-0.129576	-0.848477		-0.129176	0.053301		-0.128907	-0.023141		-0.128665	-0.051391		-0.129238	-0.020044		-0.129164	1.20894		-0.210001	0.43562
-0.128911	-0.84804		-0.12851	0.05364		-0.128241	-0.022589		-0.127999	-0.051364		-0.128573	-0.020225		-0.128498	1.20702		-0.209395	0.437036
-0.128245	-0.848186		-0.127845	0.053436		-0.127575	-0.022368		-0.127333	-0.050114		-0.127908	-0.019536		-0.127832	1.20546		-0.20879	0.438526
-0.12758	-0.848076		-0.127179	0.05341		-0.126909	-0.021603		-0.126667	-0.049173		-0.127243	-0.020944		-0.127166	1.20322		-0.208184	0.439772
-0.126914	-0.847984		-0.126514	0.053133		-0.126243	-0.022283		-0.126001	-0.048611		-0.126578	-0.022178		-0.1265	1.2007		-0.207579	0.440143
-0.126249	-0.848444		-0.125848	0.053252		-0.125577	-0.023567		-0.125335	-0.048897		-0.125913	-0.022151		-0.125834	1.19772		-0.206973	0.442117
-0.125583	-0.848191		-0.125183	0.053294		-0.124911	-0.023366		-0.124669	-0.048718		-0.125247	-0.022363		-0.125168	1.19504		-0.206368	0.444443
-0.124918	-0.847204		-0.124517	0.053535		-0.124245	-0.023892		-0.124004	-0.048002		-0.124582	-0.021342		-0.124502	1.19262		-0.205762	0.445573
-0.124252	-0.84746		-0.123851	0.053406		-0.123579	-0.024417		-0.123338	-0.047941		-0.123917	-0.020709		-0.123836	1.19056		-0.205157	0.44647
-0.123587	-0.848116		-0.123186	0.053026		-0.122913	-0.024558		-0.122672	-0.047856		-0.123252	-0.02072		-0.12317	1.18854		-0.204551	0.447811
-0.122921	-0.848501		-0.12252	0.054025		-0.122247	-0.02345		-0.122006	-0.04783		-0.122587	-0.01982		-0.122504	1.18571		-0.203946	0.448907
-0.122256	-0.848752		-0.121855	0.054157		-0.121581	-0.02348		-0.12134	-0.048203		-0.121921	-0.019819		-0.121838	1.1822		-0.20334	0.449751
-0.12159	-0.848986		-0.121189	0.054565		-0.120915	-0.02339		-0.120674	-0.047893		-0.121256	-0.02034		-0.121172	1.1792		-0.202735	0.450241
-0.120924	-0.849737		-0.120524	0.055448		-0.120249	-0.022875		-0.120008	-0.047782		-0.120591	-0.020896		-0.120506	1.17619		-0.202129	0.450281
-0.120259	-0.849977		-0.119858	0.05592		-0.119583	-0.022639		-0.119342	-0.048163		-0.119926	-0.022158		-0.11984	1.17281		-0.201524	0.450705
-0.119593	-0.849907		-0.119193	0.055769		-0.118917	-0.023566		-0.118676	-0.04833		-0.119261	-0.021585		-0.119174	1.16992		-0.200918	0.452148
-0.118928	-0.849972		-0.118527	0.055947		-0.118251	-0.023738		-0.11801	-0.047608		-0.118595	-0.02167		-0.118508	1.16669		-0.200313	0.452912
-0.118262	-0.850245		-0.117861	0.056367		-0.117585	-0.02473		-0.117344	-0.046748		-0.11793	-0.022001		-0.117842	1.16365		-0.199707	0.454048
-0.117597	-0.850518		-0.117196	0.056508		-0.116919	-0.025199		-0.116678	-0.046737		-0.117265	-0.021506		-0.117176	1.15965		-0.199102	0.454486
-0.116931	-0.850465		-0.11653	0.056872		-0.116253	-0.024988		-0.116012	-0.046916		-0.1166	-0.021266		-0.11651	1.15569		-0.198496	0.455133
-0.116266	-0.849541		-0.115865	0.056954		-0.115587	-0.025388		-0.115346	-0.047489		-0.115935	-0.022089		-0.115844	1.1527		-0.197891	0.456228
-0.1156	-0.849654		-0.115199	0.056875		-0.114921	-0.025466		-0.11468	-0.047854		-0.115269	-0.022144		-0.115178	1.14996		-0.197285	0.457597
-0.114935	-0.849964		-0.114534	0.05705		-0.114255	-0.025219		-0.114014	-0.048618		-0.114604	-0.022591		-0.114512	1.14732		-0.19668	0.458649
-0.114269	-0.850066		-0.113868	0.05783		-0.113589	-0.024712		-0.113348	-0.049599		-0.113939	-0.022717		-0.113846	1.14383		-0.196074	0.45904
-0.113604	-0.850175		-0.113203	0.057815		-0.112923	-0.025036		-0.112682	-0.049903		-0.113274	-0.022772		-0.11318	1.14013		-0.195469	0.458819
-0.112938	-0.851535		-0.112537	0.056912		-0.112257	-0.025209		-0.112016	-0.049873		-0.112609	-0.022661		-0.112514	1.13697		-0.194863	0.460256
-0.112273	-0.852441		-0.111871	0.057021		-0.111591	-0.023921		-0.11135	-0.049624		-0.111944	-0.022793		-0.111848	1.1342		-0.194258	0.462078
-0.111607	-0.852673		-0.111206	0.057655		-0.110925	-0.024071		-0.110684	-0.049632		-0.111278	-0.022837		-0.111182	1.1308		-0.193652	0.462974
-0.110942	-0.853046		-0.11054	0.05833		-0.110259	-0.023397		-0.110018	-0.050322		-0.110613	-0.022767		-0.110516	1.12774		-0.193047	0.464152
-0.110276	-0.852632		-0.109875	0.059003		-0.109593	-0.022957		-0.109352	-0.050787		-0.109948	-0.022141		-0.10985	1.12485		-0.192441	0.464651
-0.10961	-0.852347		-0.109209	0.058933		-0.108927	-0.022623		-0.108686	-0.050541		-0.109283	-0.022481		-0.109184	1.12284		-0.191836	0.465407
-0.108945	-0.851791		-0.108544	0.058897		-0.108261	-0.023354		-0.10802	-0.050184		-0.108618	-0.023679		-0.108518	1.121		-0.19123	0.466489
-0.108279	-0.852659		-0.107878	0.058496		-0.107595	-0.024117		-0.107354	-0.050038		-0.107952	-0.024815		-0.107852	1.11801		-0.190625	0.467421
-0.107614	-0.852863		-0.107213	0.059278		-0.106929	-0.023429		-0.106688	-0.050008		-0.107287	-0.025946		-0.107186	1.11375		-0.190019	0.468084
-0.106948	-0.853666		-0.106547	0.059579		-0.106263	-0.023089		-0.106022	-0.049577		-0.106622	-0.027341		-0.10652	1.10982		-0.189414	0.468738
-0.106283	-0.85364		-0.105882	0.059855		-0.105597	-0.022973		-0.105356	-0.049254		-0.105957	-0.028482		-0.105854	1.10701		-0.188808	0.470113
-0.105617	-0.854063		-0.105216	0.059552		-0.104931	-0.02275		-0.10469	-0.049319		-0.105292	-0.028948		-0.105188	1.10438		-0.188203	0.471463
-0.104952	-0.853693		-0.10455	0.058999		-0.104265	-0.021616		-0.104024	-0.049355		-0.104626	-0.029374		-0.104522	1.1014		-0.187597	0.472558
-0.104286	-0.853226		-0.103885	0.05881		-0.103599	-0.022644		-0.103358	-0.049573		-0.103961	-0.029847		-0.103856	1.09797		-0.186992	0.473613
-0.103621	-0.853448		-0.103219	0.05815		-0.102933	-0.02293		-0.102692	-0.050199		-0.103296	-0.03037		-0.10319	1.09513		-0.186386	0.474566
-0.102955	-0.85277		-0.102554	0.058175		-0.102267	-0.023026		-0.102026	-0.050417		-0.102631	-0.030573		-0.102524	1.09198		-0.185781	0.475702
-0.10229	-0.85267		-0.101888	0.057834		-0.101601	-0.023435		-0.10136	-0.049664		-0.101966	-0.030458		-0.101858	1.08851		-0.185175	0.476814
-0.101624	-0.852846		-0.101223	0.057693		-0.100935	-0.023744		-0.100694	-0.04921		-0.101301	-0.030169		-0.101192	1.08485		-0.18457	0.477288
-0.100959	-0.853582		-0.100557	0.058502		-0.100269	-0.023647		-0.100028	-0.049203		-0.100635	-0.030973		-0.100526	1.08175		-0.183964	0.477482
-0.100293	-0.854515		-0.099892	0.059172		-0.099603	-0.023435		-0.099362	-0.049388		-0.09997	-0.031215		-0.09986	1.07909		-0.183359	0.477829
-0.099627	-0.855188		-0.099226	0.060121		-0.098938	-0.023047		-0.098696	-0.04937		-0.099305	-0.031852		-0.099194	1.07647		-0.182753	0.47828
-0.098962	-0.854621		-0.098561	0.061177		-0.098272	-0.023348		-0.09803	-0.048568		-0.09864	-0.031911		-0.098528	1.07374		-0.182148	0.479261
-0.098296	-0.855027		-0.097895	0.06065		-0.097606	-0.023168		-0.097364	-0.048438		-0.097975	-0.03182		-0.097862	1.07121		-0.181542	0.479325
-0.097631	-0.854795		-0.097229	0.060564		-0.09694	-0.023305		-0.096698	-0.04905		-0.097309	-0.032168		-0.097196	1.0679		-0.180937	0.479427
-0.096965	-0.854574		-0.096564	0.060377		-0.096274	-0.022155		-0.096032	-0.049926		-0.096644	-0.032843		-0.09653	1.06528		-0.180331	0.480459
-0.0963	-0.854792		-0.095898	0.060021		-0.095608	-0.022888		-0.095366	-0.049128		-0.095979	-0.033169		-0.095864	1.06248		-0.179726	0.480597
-0.095634	-0.855663		-0.095233	0.059957		-0.094942	-0.023859		-0.0947	-0.049647		-0.095314	-0.033286		-0.095198	1.05863		-0.17912	0.481307
-0.094969	-0.855881		-0.094567	0.060121		-0.094276	-0.023909		-0.094034	-0.050718		-0.094649	-0.033366		-0.094532	1.05464		-0.178515	0.482452
-0.094303	-0.855701		-0.093902	0.059869		-0.09361	-0.024446		-0.093368	-0.051275		-0.093983	-0.033254		-0.093866	1.05117		-0.177909	0.483139
-0.093638	-0.855753		-0.093236	0.060541		-0.092944	-0.024168		-0.092703	-0.052238		-0.093318	-0.032986		-0.0932	1.04772		-0.177304	0.483468
-0.092972	-0.855369		-0.092571	0.061022		-0.092278	-0.023795		-0.092036	-0.052155		-0.092653	-0.033407		-0.092534	1.04453		-0.176698	0.484279
-0.092307	-0.855027		-0.091905	0.061293		-0.091612	-0.023346		-0.091371	-0.052342		-0.091988	-0.033781		-0.091868	1.04129		-0.176093	0.48565
-0.091641	-0.855832		-0.091239	0.060534		-0.090946	-0.024152		-0.090705	-0.052928		-0.091323	-0.034672		-0.091202	1.0378		-0.175487	0.486659
-0.090976	-0.855988		-0.090574	0.060136		-0.09028	-0.024202		-0.090039	-0.053314		-0.090658	-0.035666		-0.090536	1.035		-0.174882	0.487413
-0.09031	-0.855869		-0.089908	0.059836		-0.089614	-0.024206		-0.089373	-0.05401		-0.089992	-0.036011		-0.08987	1.03189		-0.174276	0.488709
-0.089645	-0.855696		-0.089243	0.058328		-0.088948	-0.02544		-0.088707	-0.054638		-0.089327	-0.036829		-0.089204	1.0285		-0.173671	0.491053
-0.088979	-0.855938		-0.088577	0.058196		-0.088282	-0.025218		-0.088041	-0.055278		-0.088662	-0.036879		-0.088538	1.02558		-0.173065	0.490734
-0.088313	-0.856329		-0.087912	0.056986		-0.087616	-0.025445		-0.087375	-0.055546		-0.087997	-0.036246		-0.087872	1.02252		-0.17246	0.491875
-0.087648	-0.855916		-0.087246	0.056889		-0.08695	-0.025616		-0.086709	-0.055301		-0.087332	-0.036663		-0.087206	1.01942		-0.171854	0.492148
-0.086982	-0.855311		-0.086581	0.056147		-0.086284	-0.025367		-0.086043	-0.05479		-0.086666	-0.036777		-0.08654	1.01639		-0.171249	0.492454
-0.086317	-0.85481		-0.085915	0.056416		-0.085618	-0.025017		-0.085377	-0.054851		-0.086001	-0.036759		-0.085874	1.01321		-0.170643	0.493033
-0.085651	-0.854571		-0.085249	0.056223		-0.084952	-0.024796		-0.084711	-0.055063		-0.085336	-0.036647		-0.085208	1.01023		-0.170038	0.493525
-0.084986	-0.854737		-0.084584	0.055206		-0.084286	-0.024064		-0.084045	-0.055121		-0.084671	-0.036669		-0.084542	1.00711		-0.169432	0.494182
-0.08432	-0.854857		-0.083918	0.054447		-0.08362	-0.023945		-0.083379	-0.054421		-0.084006	-0.037334		-0.083876	1.00426		-0.168827	0.495408
-0.083655	-0.855011		-0.083253	0.05347		-0.082954	-0.024751		-0.082713	-0.053819		-0.08334	-0.037983		-0.08321	1.00144		-0.168221	0.496859
-0.082989	-0.855242		-0.082587	0.053364		-0.082288	-0.024984		-0.082047	-0.053593		-0.082675	-0.038297		-0.082544	0.998382		-0.167616	0.497522
-0.082324	-0.854889		-0.081922	0.054474		-0.081622	-0.024278		-0.081381	-0.054055		-0.08201	-0.038599		-0.081878	0.994994		-0.16701	0.499068
-0.081658	-0.854616		-0.081256	0.054124		-0.080956	-0.02448		-0.080715	-0.054134		-0.081345	-0.038285		-0.081212	0.991594		-0.166405	0.499938
-0.080993	-0.854479		-0.080591	0.053745		-0.08029	-0.024869		-0.080049	-0.053642		-0.08068	-0.03802		-0.080546	0.988455		-0.165799	0.500838
-0.080327	-0.85417		-0.079925	0.054124		-0.079624	-0.024659		-0.079383	-0.052889		-0.080014	-0.037811		-0.07988	0.986099		-0.165194	0.502015
-0.079662	-0.853365		-0.07926	0.054606		-0.078958	-0.025289		-0.078717	-0.052553		-0.079349	-0.038112		-0.079214	0.983355		-0.164588	0.503386
-0.078996	-0.852758		-0.078594	0.054668		-0.078292	-0.026485		-0.078051	-0.053515		-0.078684	-0.039316		-0.078548	0.980557		-0.163983	0.504293
-0.078331	-0.852762		-0.077928	0.054351		-0.077626	-0.026664		-0.077385	-0.05436		-0.078019	-0.039473		-0.077882	0.978293		-0.163377	0.504965
-0.077665	-0.852766		-0.077263	0.054093		-0.07696	-0.026799		-0.076719	-0.054033		-0.077354	-0.040222		-0.077216	0.975203		-0.162772	0.505735
-0.076999	-0.853356		-0.076597	0.053496		-0.076294	-0.026298		-0.076053	-0.053648		-0.076689	-0.040647		-0.07655	0.971716		-0.162166	0.506533
-0.076334	-0.854465		-0.075932	0.053181		-0.075628	-0.026253		-0.075387	-0.053986		-0.076023	-0.040625		-0.075884	0.968101		-0.161561	0.507457
-0.075668	-0.855626		-0.075266	0.053323		-0.074962	-0.026106		-0.074721	-0.05428		-0.075358	-0.04103		-0.075218	0.964233		-0.160955	0.50815
-0.075003	-0.855317		-0.074601	0.053419		-0.074296	-0.026164		-0.074055	-0.054364		-0.074693	-0.040627		-0.074552	0.961111		-0.160349	0.509856
-0.074337	-0.855096		-0.073935	0.052814		-0.07363	-0.026962		-0.073389	-0.054945		-0.074028	-0.040257		-0.073886	0.959024		-0.159744	0.510665
-0.073672	-0.855024		-0.07327	0.052343		-0.072964	-0.027769		-0.072723	-0.05553		-0.073363	-0.039334		-0.07322	0.956845		-0.159139	0.512031
-0.073006	-0.855481		-0.072604	0.05266		-0.072298	-0.028163		-0.072057	-0.055823		-0.072697	-0.039499		-0.072554	0.953948		-0.158533	0.512573
-0.072341	-0.854896		-0.071939	0.05299		-0.071632	-0.027438		-0.071391	-0.056317		-0.072032	-0.039361		-0.071888	0.950276		-0.157928	0.513757
-0.071675	-0.854714		-0.071273	0.053173		-0.070966	-0.027859		-0.070725	-0.05697		-0.071367	-0.039887		-0.071222	0.946583		-0.157322	0.5158
-0.07101	-0.854904		-0.070607	0.052818		-0.0703	-0.027364		-0.070059	-0.057556		-0.070702	-0.040726		-0.070556	0.943068		-0.156717	0.517763
-0.070344	-0.854319		-0.069942	0.052937		-0.069634	-0.027994		-0.069393	-0.057985		-0.070037	-0.040759		-0.06989	0.939595		-0.156111	0.519073
-0.069679	-0.853817		-0.069276	0.053545		-0.068968	-0.028459		-0.068727	-0.057539		-0.069371	-0.040493		-0.069224	0.936813		-0.155505	0.519919
-0.069013	-0.853582		-0.068611	0.053729		-0.068302	-0.027191		-0.068061	-0.057826		-0.068706	-0.039625		-0.068558	0.933667		-0.1549	0.520801
-0.068348	-0.854432		-0.067945	0.053496		-0.067636	-0.027705		-0.067395	-0.057892		-0.068041	-0.040238		-0.067892	0.930115		-0.154294	0.522148
-0.067682	-0.853064		-0.06728	0.052823		-0.06697	-0.028844		-0.066729	-0.057176		-0.067376	-0.040731		-0.067226	0.926536		-0.153689	0.522953
-0.067016	-0.852269		-0.066614	0.05223		-0.066304	-0.02803		-0.066063	-0.056408		-0.066711	-0.040806		-0.06656	0.923005		-0.153084	0.523899
-0.066351	-0.850641		-0.065949	0.051268		-0.065638	-0.028079		-0.065397	-0.056632		-0.066046	-0.04044		-0.065894	0.919673		-0.152478	0.524516
-0.065685	-0.851497		-0.065283	0.049918		-0.064972	-0.027916		-0.064731	-0.056861		-0.06538	-0.040648		-0.065228	0.916128		-0.151872	0.525603
-0.06502	-0.850578		-0.064617	0.049974		-0.064306	-0.027833		-0.064065	-0.056739		-0.064715	-0.041664		-0.064562	0.91269		-0.151267	0.527349
-0.064354	-0.850717		-0.063952	0.050215		-0.06364	-0.026977		-0.063399	-0.055879		-0.06405	-0.042154		-0.063896	0.909639		-0.150661	0.528854
-0.063689	-0.850951		-0.063286	0.050254		-0.062974	-0.027715		-0.062733	-0.055808		-0.063385	-0.042423		-0.06323	0.906074		-0.150056	0.530863
-0.063023	-0.850842		-0.062621	0.050997		-0.062308	-0.028029		-0.062067	-0.05637		-0.06272	-0.042787		-0.062564	0.902549		-0.14945	0.53268
-0.062358	-0.84989		-0.061955	0.051467		-0.061642	-0.028515		-0.061401	-0.055812		-0.062054	-0.042986		-0.061898	0.899115		-0.148845	0.533747
-0.061692	-0.849681		-0.06129	0.05198		-0.060976	-0.028085		-0.060735	-0.055219		-0.061389	-0.043083		-0.061232	0.895678		-0.148239	0.535024
-0.061027	-0.850743		-0.060624	0.052096		-0.06031	-0.028495		-0.06007	-0.054762		-0.060724	-0.043015		-0.060566	0.892039		-0.147634	0.536539
-0.060361	-0.851163		-0.059959	0.051923		-0.059644	-0.030118		-0.059404	-0.054456		-0.060059	-0.0426		-0.0599	0.888772		-0.147028	0.537766
-0.059696	-0.851333		-0.059293	0.051599		-0.058978	-0.030235		-0.058738	-0.054088		-0.059394	-0.042345		-0.059234	0.885973		-0.146423	0.538661
-0.05903	-0.851593		-0.058627	0.051478		-0.058312	-0.031161		-0.058072	-0.053643		-0.058728	-0.04216		-0.058568	0.882477		-0.145817	0.539596
-0.058365	-0.851715		-0.057962	0.052013		-0.057646	-0.030047		-0.057406	-0.053835		-0.058063	-0.041486		-0.057902	0.878662		-0.145212	0.541147
-0.057699	-0.851801		-0.057296	0.052245		-0.05698	-0.029993		-0.05674	-0.053674		-0.057398	-0.040871		-0.057236	0.874472		-0.144606	0.54274
-0.057034	-0.852753		-0.056631	0.052697		-0.056314	-0.029429		-0.056074	-0.053367		-0.056733	-0.04159		-0.05657	0.871419		-0.144001	0.543957
-0.056368	-0.853959		-0.055965	0.054078		-0.055648	-0.028033		-0.055408	-0.052699		-0.056068	-0.042733		-0.055904	0.868993		-0.143395	0.544854
-0.055702	-0.853802		-0.0553	0.054674		-0.054982	-0.028842		-0.054742	-0.051797		-0.055403	-0.043583		-0.055238	0.865477		-0.14279	0.545543
-0.055037	-0.853731		-0.054634	0.055046		-0.054316	-0.028562		-0.054076	-0.051466		-0.054737	-0.044566		-0.054572	0.861404		-0.142184	0.546083
-0.054371	-0.853723		-0.053969	0.054934		-0.05365	-0.029178		-0.05341	-0.051765		-0.054072	-0.044205		-0.053906	0.858145		-0.141579	0.546097
-0.053706	-0.854915		-0.053303	0.055096		-0.052984	-0.029185		-0.052744	-0.051638		-0.053407	-0.043188		-0.05324	0.855886		-0.140973	0.547587
-0.05304	-0.854827		-0.052638	0.055354		-0.052318	-0.029045		-0.052078	-0.051232		-0.052742	-0.043447		-0.052574	0.853081		-0.140368	0.547598
-0.052375	-0.854955		-0.051972	0.055639		-0.051652	-0.029575		-0.051412	-0.051325		-0.052077	-0.04406		-0.051908	0.85001		-0.139762	0.548982
-0.051709	-0.854618		-0.051306	0.056117		-0.050986	-0.029679		-0.050746	-0.051164		-0.051411	-0.043967		-0.051242	0.847151		-0.139157	0.550202
-0.051044	-0.855131		-0.050641	0.056936		-0.05032	-0.029306		-0.05008	-0.05079		-0.050746	-0.043999		-0.050576	0.844352		-0.138551	0.551402
-0.050378	-0.854993		-0.049975	0.057251		-0.049654	-0.028512		-0.049414	-0.050756		-0.050081	-0.044172		-0.04991	0.84111		-0.137946	0.552742
-0.049713	-0.855235		-0.04931	0.05649		-0.048988	-0.028403		-0.048748	-0.050909		-0.049416	-0.044356		-0.049244	0.837935		-0.13734	0.553987
-0.049047	-0.856027		-0.048644	0.055333		-0.048322	-0.028333		-0.048082	-0.050829		-0.048751	-0.044511		-0.048578	0.834698		-0.136735	0.555394
-0.048382	-0.856943		-0.047979	0.055113		-0.047656	-0.028239		-0.047416	-0.050484		-0.048085	-0.0448		-0.047912	0.83119		-0.136129	0.556809
-0.047716	-0.857252		-0.047313	0.055256		-0.04699	-0.028203		-0.04675	-0.049799		-0.04742	-0.045565		-0.047246	0.827783		-0.135524	0.557946
-0.047051	-0.857816		-0.046648	0.054772		-0.046324	-0.028407		-0.046084	-0.049232		-0.046755	-0.045719		-0.04658	0.823471		-0.134918	0.558968
-0.046385	-0.858696		-0.045982	0.054554		-0.045658	-0.028746		-0.045418	-0.049125		-0.04609	-0.045721		-0.045914	0.819983		-0.134313	0.559147
-0.04572	-0.858984		-0.045317	0.054454		-0.044992	-0.027859		-0.044752	-0.048625		-0.045425	-0.046014		-0.045248	0.816268		-0.133707	0.559244
-0.045054	-0.859661		-0.044651	0.054019		-0.044326	-0.027493		-0.044086	-0.048352		-0.04476	-0.045823		-0.044582	0.811914		-0.133102	0.56023
-0.044388	-0.859261		-0.043985	0.054076		-0.04366	-0.027963		-0.04342	-0.048088		-0.044094	-0.04518		-0.043916	0.807739		-0.132496	0.561793
-0.043723	-0.858615		-0.04332	0.054613		-0.042994	-0.02843		-0.042754	-0.04786		-0.043429	-0.044799		-0.04325	0.803795		-0.131891	0.563456
-0.043057	-0.858875		-0.042654	0.054789		-0.042328	-0.028568		-0.042088	-0.048213		-0.042764	-0.04525		-0.042584	0.799703		-0.131285	0.564756
-0.042392	-0.858308		-0.041989	0.054984		-0.041662	-0.028391		-0.041422	-0.048051		-0.042099	-0.045365		-0.041918	0.796765		-0.13068	0.565846
-0.041726	-0.859063		-0.041323	0.054837		-0.040996	-0.028013		-0.040756	-0.047632		-0.041434	-0.045755		-0.041252	0.793791		-0.130074	0.567007
-0.041061	-0.85902		-0.040658	0.054765		-0.04033	-0.026926		-0.04009	-0.047712		-0.040768	-0.046716		-0.040586	0.790223		-0.129469	0.568235
-0.040395	-0.858444		-0.039992	0.054414		-0.039664	-0.026624		-0.039424	-0.047266		-0.040103	-0.046524		-0.03992	0.786351		-0.128863	0.570559
-0.03973	-0.857611		-0.039327	0.05369		-0.038998	-0.027262		-0.038758	-0.048325		-0.039438	-0.045926		-0.039254	0.782438		-0.128258	0.571069
-0.039064	-0.857802		-0.038661	0.052557		-0.038332	-0.027495		-0.038092	-0.048662		-0.038773	-0.045385		-0.038588	0.778783		-0.127652	0.573002
-0.038399	-0.857925		-0.037995	0.052022		-0.037666	-0.027664		-0.037426	-0.048599		-0.038108	-0.044713		-0.037922	0.776032		-0.127047	0.574699
-0.037733	-0.858123		-0.03733	0.052962		-0.037	-0.028494		-0.03676	-0.047847		-0.037442	-0.044279		-0.037256	0.773477		-0.126441	0.575779
-0.037068	-0.858773		-0.036664	0.053287		-0.036334	-0.028121		-0.036094	-0.045987		-0.036777	-0.044497		-0.03659	0.770042		-0.125836	0.577107
-0.036402	-0.859955		-0.035999	0.052614		-0.035668	-0.028268		-0.035428	-0.045631		-0.036112	-0.045219		-0.035924	0.766539		-0.12523	0.578548
-0.035737	-0.860193		-0.035333	0.052683		-0.035002	-0.028908		-0.034762	-0.045337		-0.035447	-0.04632		-0.035258	0.763378		-0.124625	0.57945
-0.035071	-0.860414		-0.034668	0.053033		-0.034337	-0.028236		-0.034096	-0.045444		-0.034782	-0.047093		-0.034592	0.759951		-0.124019	0.579632
-0.034405	-0.860988		-0.034002	0.053696		-0.03367	-0.027599		-0.03343	-0.045723		-0.034116	-0.04745		-0.033926	0.75616		-0.123414	0.579822
-0.03374	-0.861309		-0.033337	0.05345		-0.033005	-0.028949		-0.032764	-0.0469		-0.033451	-0.04771		-0.03326	0.752384		-0.122808	0.580777
-0.033074	-0.861254		-0.032671	0.053222		-0.032339	-0.028927		-0.032098	-0.046635		-0.032786	-0.048395		-0.032594	0.749251		-0.122203	0.582071
-0.032409	-0.861157		-0.032006	0.053595		-0.031673	-0.028207		-0.031432	-0.046134		-0.032121	-0.048855		-0.031928	0.746933		-0.121597	0.58385
-0.031743	-0.86184		-0.03134	0.053708		-0.031007	-0.028008		-0.030766	-0.045801		-0.031456	-0.048655		-0.031262	0.744077		-0.120992	0.584812
-0.031078	-0.860738		-0.030674	0.053489		-0.030341	-0.028187		-0.0301	-0.045883		-0.030791	-0.048634		-0.030596	0.739926		-0.120386	0.585894
-0.030412	-0.860872		-0.030009	0.052632		-0.029675	-0.02873		-0.029434	-0.045558		-0.030125	-0.048669		-0.02993	0.735627		-0.119781	0.587516
-0.029747	-0.861082		-0.029343	0.051901		-0.029009	-0.028129		-0.028768	-0.044626		-0.02946	-0.0482		-0.029264	0.731536		-0.119175	0.589121
-0.029081	-0.860993		-0.028678	0.051662		-0.028343	-0.027304		-0.028103	-0.045086		-0.028795	-0.04733		-0.028598	0.727325		-0.11857	0.590435
-0.028416	-0.860812		-0.028012	0.051452		-0.027677	-0.027437		-0.027437	-0.045545		-0.02813	-0.047476		-0.027932	0.724492		-0.117964	0.59117
-0.02775	-0.859821		-0.027347	0.051822		-0.027011	-0.026429		-0.026771	-0.044815		-0.027465	-0.048287		-0.027266	0.721858		-0.117359	0.591727
-0.027085	-0.858797		-0.026681	0.052029		-0.026345	-0.025606		-0.026105	-0.044983		-0.026799	-0.048624		-0.0266	0.718571		-0.116753	0.592626
-0.026419	-0.859014		-0.026016	0.051885		-0.025679	-0.025888		-0.025439	-0.045391		-0.026134	-0.048324		-0.025934	0.714953		-0.116148	0.593912
-0.025754	-0.859869		-0.02535	0.051737		-0.025013	-0.025733		-0.024773	-0.046508		-0.025469	-0.047932		-0.025268	0.711925		-0.115542	0.595587
-0.025088	-0.859983		-0.024684	0.051638		-0.024347	-0.025811		-0.024107	-0.046491		-0.024804	-0.047915		-0.024602	0.709296		-0.114937	0.597705
-0.024423	-0.859837		-0.024019	0.051353		-0.023681	-0.025523		-0.023441	-0.04639		-0.024139	-0.0474		-0.023936	0.705525		-0.114331	0.599446
-0.023757	-0.858986		-0.023353	0.051174		-0.023015	-0.026052		-0.022775	-0.046464		-0.023473	-0.045921		-0.02327	0.700895		-0.113726	0.600586
-0.023091	-0.857974		-0.022688	0.051034		-0.022349	-0.02663		-0.022109	-0.047018		-0.022808	-0.044503		-0.022604	0.696085		-0.11312	0.601355
-0.022426	-0.858121		-0.022022	0.050775		-0.021683	-0.026875		-0.021443	-0.047353		-0.022143	-0.04382		-0.021938	0.692292		-0.112515	0.602897
-0.02176	-0.857671		-0.021357	0.050745		-0.021017	-0.027132		-0.020777	-0.047869		-0.021478	-0.043329		-0.021272	0.689019		-0.111909	0.604087
-0.021095	-0.858088		-0.020691	0.050589		-0.020351	-0.027079		-0.020111	-0.048323		-0.020813	-0.04349		-0.020606	0.685445		-0.111304	0.605099
-0.020429	-0.857722		-0.020026	0.050156		-0.019685	-0.027445		-0.019445	-0.048648		-0.020147	-0.043771		-0.01994	0.68177		-0.110698	0.606334
-0.019764	-0.858584		-0.01936	0.049685		-0.019019	-0.027244		-0.018779	-0.049336		-0.019482	-0.043053		-0.019274	0.678055		-0.110093	0.607935
-0.019098	-0.858074		-0.018695	0.049666		-0.018353	-0.026216		-0.018113	-0.049234		-0.018817	-0.042699		-0.018608	0.674869		-0.109487	0.609948
-0.018433	-0.858255		-0.018029	0.049518		-0.017687	-0.025629		-0.017447	-0.049546		-0.018152	-0.043476		-0.017942	0.671158		-0.108882	0.612294
-0.017767	-0.856932		-0.017363	0.049687		-0.017021	-0.025254		-0.016781	-0.049946		-0.017487	-0.043987		-0.017276	0.667152		-0.108276	0.61456
-0.017102	-0.85727		-0.016698	0.049903		-0.016355	-0.025742		-0.016115	-0.050172		-0.016822	-0.044102		-0.01661	0.663932		-0.107671	0.615763
-0.016436	-0.858286		-0.016032	0.050198		-0.015689	-0.02576		-0.015449	-0.049864		-0.016156	-0.043746		-0.015944	0.660582		-0.107065	0.616479
-0.015771	-0.857802		-0.015367	0.050646		-0.015023	-0.026638		-0.014783	-0.049408		-0.015491	-0.043367		-0.015278	0.656952		-0.10646	0.616154
-0.015105	-0.856847		-0.014701	0.050422		-0.014357	-0.027889		-0.014117	-0.049294		-0.014826	-0.043048		-0.014612	0.653121		-0.105854	0.616931
-0.014439	-0.857483		-0.014036	0.049761		-0.013691	-0.027924		-0.013451	-0.049356		-0.014161	-0.04285		-0.013946	0.649785		-0.105249	0.617754
-0.013774	-0.858252		-0.01337	0.049703		-0.013025	-0.028374		-0.012785	-0.050068		-0.013496	-0.042549		-0.01328	0.646912		-0.104643	0.618458
-0.013108	-0.857424		-0.012705	0.049986		-0.012359	-0.027625		-0.012119	-0.049984		-0.01283	-0.041915		-0.012614	0.643549		-0.104038	0.61964
-0.012443	-0.857841		-0.012039	0.049873		-0.011693	-0.02747		-0.011453	-0.049863		-0.012165	-0.041355		-0.011948	0.639445		-0.103432	0.621525
-0.011777	-0.8575		-0.011374	0.050172		-0.011027	-0.02777		-0.010787	-0.049923		-0.0115	-0.041921		-0.011282	0.636097		-0.102827	0.623578
-0.011112	-0.858207		-0.010708	0.050838		-0.010361	-0.027909		-0.010121	-0.050158		-0.010835	-0.042275		-0.010616	0.632981		-0.102221	0.625155
-0.010446	-0.85901		-0.010042	0.05096		-0.009695	-0.027573		-0.009455	-0.050252		-0.01017	-0.042668		-0.00995	0.62937		-0.101616	0.6264
-0.009781	-0.858131		-0.009377	0.051303		-0.009029	-0.027946		-0.008789	-0.049861		-0.009504	-0.042624		-0.009284	0.626256		-0.10101	0.628361
-0.009115	-0.857963		-0.008711	0.051628		-0.008363	-0.028371		-0.008123	-0.049386		-0.008839	-0.041755		-0.008618	0.623036		-0.100405	0.629637
-0.00845	-0.857505		-0.008046	0.051662		-0.007697	-0.028501		-0.007457	-0.049688		-0.008174	-0.040863		-0.007952	0.619155		-0.099799	0.630759
-0.007784	-0.858281		-0.00738	0.051603		-0.007031	-0.029288		-0.006791	-0.049855		-0.007509	-0.040101		-0.007286	0.614946		-0.099194	0.631037
-0.007119	-0.858475		-0.006715	0.051519		-0.006365	-0.029095		-0.006125	-0.049807		-0.006844	-0.039974		-0.00662	0.611304		-0.098588	0.631294
-0.006453	-0.858817		-0.006049	0.052156		-0.005699	-0.028744		-0.005459	-0.049054		-0.006178	-0.041192		-0.005954	0.607775		-0.097983	0.63164
-0.005788	-0.858988		-0.005383	0.053071		-0.005033	-0.029563		-0.004793	-0.049286		-0.005513	-0.041709		-0.005288	0.603644		-0.097377	0.632763
-0.005122	-0.858473		-0.004718	0.053899		-0.004367	-0.029709		-0.004127	-0.049064		-0.004848	-0.042987		-0.004622	0.599252		-0.096772	0.634485
-0.004457	-0.858607		-0.004052	0.054352		-0.003701	-0.029583		-0.003461	-0.049189		-0.004183	-0.043529		-0.003956	0.595427		-0.096166	0.635714
-0.003791	-0.858585		-0.003387	0.05441		-0.003035	-0.028952		-0.002795	-0.033178		-0.003518	-0.042608		-0.00329	0.591524		-0.095561	0.636424
-0.003125	-0.858909		-0.002721	0.030506		-0.002369	-0.000494		-0.002129	0.000109		-0.002853	-0.041597		-0.002624	0.243099		-0.094955	0.63768
-0.00246	-0.051803		-0.002056	7.2e-05		-0.001703	0.00055		-0.001463	3.6e-05		-0.002187	-0.026472		-0.001958	-0.002654		-0.09435	0.637564
-0.001794	0.000112		-0.00139	0.000213		-0.001037	0.000735		-0.000797	-0.000486		-0.001522	-1.8e-05		-0.001292	-0.006689		-0.093744	0.638116
[truncated: 39,786 more rows]

## Sheet: Supplementary_fig10
Supplementary Fig. 10
Supplementary Fig. 10b
Volume(ml)	PANX1_WT	PANX1_R217H
0	4	50
0.00333	4	50
0.00667	4	-24
0.01	-2	-52
[truncated: 7,197 more rows]

[truncated: 2 more sheets: Supplementary_fig11, Supplementary_fig12]
